# Supplementary material for: Synergistic and Dose-Controlled Regulation of Cellulase Gene Expression in Penicillium oxalicum
Source: PLoS Genet. 2015 Sep 11;11(9):e1005509. doi: 10.1371/journal.pgen.1005509 (PMC4567317; doi:10.1371/journal.pgen.1005509)
Supplement: S5 Table — (XLSX) [file pgen.1005509.s016.xlsx]

## Sheet: 117 genes
GeneID	Means (Wild-type on No Carbon)	Means (Wild-type on Glucose)	Means (Wild-type on Cellulose)	log2Ratio(Wild-type Cellulose/No carbon)	Probability (Wild-type Cellulose/No carbon)	P-value (Wild-type Cellulose/No carbon)	FDR (Wild-type Cellulose/No carbon)	log2Ratio(Wild-type Cellulose/Glucose)	Probability (Wild-type Cellulose/Glucose)	P-value (Wild-type Cellulose/Glucose)	FDR (Wild-type Cellulose/Glucose)	Means (ΔclrB on Cellulose)	Means (ΔcreA on Cellulose)	Means (ΔcreA-ΔclrB on Cellulose)	Means (ΔcreA-gpdA(p)::clrB on Cellulose)	Means (ΔamyR on Cellulose)	Description	KEGG Orthology	GO Component	GO Function	GO Process
PDE_00131	28.4472	49.5167	12.0065	-1.24447	0.825984	1.90687e-07	3.27424e-06	2.0441	0.922337	4.36364e-20	1.91523e-19	11.4738	10.8133	33.3207	9.83498	7.42026	hypothetical protein	-	-	-	-
PDE_00179	22.8459	17.3905	3.98037	-2.52096	0.8629	2.53882e-05	0.000265108	2.12732	0.850506	0.000413942	0.000754054	2.64716	4.10315	2.56158	2.11012	2.77152	hypothetical protein	-	-	-	-
PDE_00237	41.7914	69.1316	19.1802	-1.12358	0.853466	0.00159988	0.00909832	1.84973	0.929182	4.92249e-21	2.24365e-20	17.8786	13.7483	37.2959	10.835	13.1812	hypothetical protein	-	GO:0016021//integral component of membrane	-	-
PDE_00249	25.7991	46.3797	11.7262	-1.13759	0.802434	0.0024362	0.0127743	1.98376	0.917773	7.46921e-29	4.52015e-28	33.5437	8.56276	76.3698	29.9397	19.6864	hypothetical protein	-	-	GO:0016491//oxidoreductase activity	GO:0008152//metabolic process
PDE_00338	31.9391	38.919	15.7763	-1.01757	0.811013	1.13597e-05	0.000130036	1.30272	0.881352	1.66618e-13	5.60375e-13	17.2374	14.5284	20.0308	9.14347	10.1062	hypothetical protein	K14796|1|8e-85|259|pcs:Pc16g14040|nucleolar protein TMA23 (A)	-	-	-
PDE_00422	133.935	284.998	47.4736	-1.49633	0.93251	0.000140454	0.00117081	2.58575	0.961829	1.04873e-83	2.31507e-82	96.5798	33.5763	116.727	26.2819	177.056	hypothetical protein	-	-	-	-
PDE_00446	50.8745	57.1742	23.8119	-1.09526	0.867292	2.06682e-09	5.2626e-08	1.26368	0.900652	8.61715e-19	3.61392e-18	21.3799	22.5676	24.8247	18.1952	19.7653	hypothetical protein	K14376|1|0.0|1010|act:ACLA_019990|poly(A) polymerase [EC:2.7.7.19] (A)	GO:0005634//nucleus	GO:0004652//polynucleotide adenylyltransferase activity;GO:0003723//RNA binding;GO:0004652//polynucleotide adenylyltransferase activity;GO:0016779//nucleotidyltransferase activity	GO:0043631//RNA polyadenylation;GO:0043631//RNA polyadenylation
PDE_00519	51.9075	65.2843	19.2496	-1.43112	0.89233	3.66476e-13	1.67021e-11	1.76191	0.925648	7.23529e-38	5.87104e-37	14.077	18.8343	16.5512	12.9131	11.8635	hypothetical protein	-	-	-	-
PDE_00526	111.517	87.3794	41.3382	-1.43172	0.9254	7.98595e-18	6.08492e-16	1.07982	0.903397	1.4944e-15	5.45065e-15	37.014	35.8381	43.0594	32.316	29.157	hypothetical protein	K13091|1|0.0|848|nfi:NFIA_009510|RNA-binding protein 39 (A)	GO:0005634//nucleus	GO:0003676//nucleic acid binding;GO:0003676//nucleic acid binding;GO:0003676//nucleic acid binding;GO:0003723//RNA binding;GO:0003676//nucleic acid binding;GO:0003676//nucleic acid binding;GO:0003676//nucleic acid binding;GO:0003676//nucleic acid binding;GO:0003676//nucleic acid binding	GO:0006397//mRNA processing
PDE_00612	25.4357	46.5625	10.9436	-1.21678	0.80927	0.00156428	0.00892315	2.08909	0.920655	3.75533e-11	1.11478e-10	13.5512	5.05388	6.13564	3.45234	15.2393	hypothetical protein	-	-	-	-
PDE_00710	334.955	1411.75	144.774	-1.21016	0.936355	2.77107e-06	3.67704e-05	3.28561	0.971093	4.04654e-35	3.03272e-34	242.914	59.3998	860.834	75.3176	61.1848	hypothetical protein	-	-	-	-
PDE_01001	90.8422	96.9484	44.7499	-1.02148	0.889664	6.94039e-08	1.32465e-06	1.11533	0.910825	5.27353e-14	1.80295e-13	40.2966	21.8953	23.8809	17.0303	35.4817	hypothetical protein	-	-	-	-
PDE_01028	39.9815	40.4128	17.1727	-1.21922	0.859089	1.91512e-05	0.000207304	1.2347	0.879945	2.02453e-07	4.79968e-07	10.0767	12.0617	6.83907	6.83863	12.5039	hypothetical protein	K12161|1|4e-53|166|aor:AOR_1_52114|ubiquitin related modifier 1 (A)	GO:0005737//cytoplasm	-	GO:0034227//tRNA thio-modification
PDE_01110	23.7251	21.9371	6.6065	-1.84446	0.845997	0.000351255	0.00256613	1.73142	0.85953	7.87449e-17	3.02791e-16	5.82046	3.82936	10.41	7.80809	4.97345	hypothetical protein	-	-	-	-
PDE_01135	118.684	133.239	49.8076	-1.25268	0.918803	7.29221e-14	3.64723e-12	1.41958	0.932476	5.84293e-27	3.34034e-26	43.0548	42.9121	61.6294	21.8412	42.4164	hypothetical protein	-	-	-	-
PDE_01147	45.2653	102.446	18.8218	-1.266	0.872676	0.025243	0.0804822	2.44438	0.948379	1.53318e-35	1.16574e-34	21.2309	18.9683	57.1992	17.2101	13.2537	hypothetical protein	-	-	-	-
PDE_01199	126.643	125.471	58.267	-1.12002	0.912548	6.99616e-05	0.000645972	1.1066	0.918099	0.000712637	0.00126671	47.922	17.0978	39.0507	38.0019	41.9768	hypothetical protein	-	-	-	-
PDE_01206	87.0398	540.395	40.2644	-1.11217	0.89826	0.00047219	0.00325922	3.74644	0.971213	1.23672e-118	5.58708e-117	37.5013	48.7797	102.782	47.4426	19.8033	hypothetical protein	-	-	-	-
PDE_01230	42.8867	69.5419	19.8904	-1.10846	0.85456	3.2946e-06	4.3015e-05	1.80581	0.928633	1.23094e-20	5.53779e-20	18.7324	6.10177	13.6622	3.25906	13.7681	hypothetical protein	-	GO:0016021//integral component of membrane	-	GO:0055085//transmembrane transport
PDE_01308	32.3538	66.8326	15.3611	-1.07465	0.822139	0.000209398	0.00165231	2.12127	0.933436	3.48233e-26	1.93169e-25	10.892	13.4588	9.82251	10.0518	8.81287	hypothetical protein	-	-	-	GO:0016192//vesicle-mediated transport
PDE_01479	47.2417	2469.77	19.5778	-1.27084	0.875701	0.00107956	0.00660124	6.97901	0.997564	1.27585e-117	5.68455e-116	22.5053	25.1133	26.7337	46.9704	32.5854	hypothetical protein	-	-	-	-
PDE_01573	39.9282	48.3506	12.462	-1.67988	0.887408	0.0031403	0.0156421	1.956	0.918957	3.3838e-34	2.46748e-33	21.6812	51.4412	138.248	146.926	24.3223	putative chitinase	K01183|1|3e-179|509|nfi:NFIA_055480|chitinase [EC:3.2.1.14] (A)	-	GO:0004553//hydrolase activity, hydrolyzing O-glycosyl compounds;GO:0004553//hydrolase activity, hydrolyzing O-glycosyl compounds;GO:0004568//chitinase activity	GO:0005975//carbohydrate metabolic process;GO:0005975//carbohydrate metabolic process;GO:0006032//chitin catabolic process
PDE_01586	27.4645	56.2008	11.0684	-1.31113	0.828292	1.55943e-05	0.00017362	2.34415	0.931395	2.94107e-38	2.4209e-37	11.7967	15.7474	22.002	13.5095	6.55823	hypothetical protein	K12592|1|3e-79|243|act:ACLA_034330|exosome complex protein LRP1 (A)	-	-	-
PDE_01710	57.2633	67.1012	12.2205	-2.2283	0.922871	1.71091e-23	1.91799e-21	2.45703	0.937948	1.34868e-39	1.15213e-38	10.0628	13.5854	14.1786	13.6819	10.4677	hypothetical protein	K07560|1|1e-108|313|pcs:Pc20g04800|D-tyrosyl-tRNA(Tyr) deacylase [EC:3.1.-.-] (A)	GO:0005737//cytoplasm;GO:0005737//cytoplasm;GO:0005737//cytoplasm	GO:0016788//hydrolase activity, acting on ester bonds;GO:0016788//hydrolase activity, acting on ester bonds;GO:0016788//hydrolase activity, acting on ester bonds	GO:0019478//D-amino acid catabolic process;GO:0019478//D-amino acid catabolic process;GO:0019478//D-amino acid catabolic process
PDE_01720	85.4274	130.513	40.7245	-1.0688	0.894124	1.26323e-06	1.81447e-05	1.68023	0.94198	2.10686e-24	1.09609e-23	26.3681	42.1947	38.0212	35.2387	29.9389	hypothetical protein	K03104|1|4e-54|169|pcs:Pc20g04850|signal recognition particle subunit SRP14 (A)	GO:0005786//signal recognition particle, endoplasmic reticulum targeting	GO:0008312//7S RNA binding;GO:0030942//endoplasmic reticulum signal peptide binding	GO:0006614//SRP-dependent cotranslational protein targeting to membrane
PDE_01766	33.0569	107.3	10.8695	-1.60466	0.868335	1.33392e-12	5.70603e-11	3.30328	0.954846	9.31684e-65	1.42287e-63	11.9449	5.64157	10.2379	10.3034	11.9781	hypothetical protein	-	-	-	-
PDE_01956	65.1786	94.9476	27.3263	-1.25411	0.894791	4.05526e-10	1.17015e-08	1.79684	0.937279	4.6541e-27	2.66383e-26	23.9394	20.5632	26.0386	16.631	18.8178	hypothetical protein	-	-	-	-
PDE_01960	39.8892	51.3753	14.9509	-1.41576	0.873342	4.88247e-10	1.3883e-08	1.78084	0.917447	1.14743e-22	5.58645e-22	13.7637	8.24575	12.5769	5.67291	8.95509	hypothetical protein	K11344|1|2e-93|277|pcs:Pc20g06770|chromatin modification-related protein EAF6 (A)	-	-	-
PDE_02025	21.0246	14.29	3.24173	-2.69724	0.85714	3.77331e-15	2.17758e-13	2.14016	0.828118	8.844e-11	2.56807e-10	1.75893	2.78743	3.24942	1.54917	1.83352	hypothetical protein	-	-	GO:0005506//iron ion binding;GO:0009055//electron carrier activity;GO:0016705//oxidoreductase activity, acting on paired donors, with incorporation or reduction of molecular oxygen;GO:0020037//heme binding	GO:0055114//oxidation-reduction process
PDE_02070	86.8606	241.485	41.3783	-1.06983	0.894688	5.4173e-06	6.68796e-05	2.54499	0.959822	7.49076e-31	4.86674e-30	37.7064	33.1815	686.926	202.805	75.9272	hypothetical protein	-	-	-	-
PDE_02206	34.5673	61.3743	11.9423	-1.53332	0.867019	4.02536e-07	6.45713e-06	2.36155	0.934363	3.60634e-25	1.92675e-24	5.72397	4.88706	8.30475	9.14889	8.75171	hypothetical protein	-	-	-	-
PDE_02260	45.5641	47.4089	20.3518	-1.16274	0.865053	0.00047501	0.00327636	1.22	0.888231	1.65022e-05	3.39444e-05	15.5477	18.9232	18.3576	16.1013	13.3423	hypothetical protein	-	-	-	-
PDE_02283	24.5568	23.6369	10.8553	-1.17773	0.800178	0.00284588	0.0145015	1.12264	0.822903	1.94448e-05	3.9728e-05	15.246	4.5964	22.5049	1.8423	3.53464	hypothetical protein	-	-	-	-
PDE_02311	105.007	116.102	32.7348	-1.68159	0.933244	0.0153011	0.0547679	1.82649	0.942203	8.17657e-41	7.18724e-40	64.4385	40.7506	125.456	27.4482	143.302	hypothetical protein	K00928|1|0.0|934|pcs:Pc20g00640|aspartate kinase [EC:2.7.2.4] (A)	-	-	-
PDE_02398	111.067	214.299	44.7169	-1.31254	0.920307	9.64424e-15	5.31414e-13	2.26073	0.955979	3.37184e-65	5.20679e-64	55.4182	15.2806	49.3146	45.0745	84.7277	hypothetical protein	-	-	-	-
PDE_02399	135.581	242.197	21.3815	-2.66472	0.953873	7.89463e-14	3.92838e-12	3.50175	0.96538	3.34967e-29	2.0605e-28	29.5314	9.1189	25.6526	22.3433	39.5833	hypothetical protein	-	-	-	-
PDE_02435	34.422	26.5908	10.2758	-1.74407	0.878914	6.43359e-17	4.41879e-15	1.37167	0.855962	1.32365e-12	4.25154e-12	7.95163	6.77285	6.05778	4.63269	7.29024	hypothetical protein	K15564|1|1e-177|503|pcs:Pc22g11660|CTD kinase subunit beta (A)	-	-	-
PDE_02469	115.036	246.385	49.2611	-1.22357	0.916667	1.22616e-10	3.93379e-09	2.32239	0.958415	5.7678e-34	4.16835e-33	20.3293	25.514	27.8281	30.7316	21.4319	hypothetical protein	-	-	-	-
PDE_02482	69.2127	68.079	19.59	-1.82092	0.922272	4.1748e-16	2.71446e-14	1.79709	0.927964	1.50784e-34	1.11289e-33	16.5423	13.1609	17.9735	6.24831	11.7879	hypothetical protein	-	-	-	-
PDE_02513	36.514	36.0104	5.84752	-2.64255	0.904532	3.92687e-10	1.13646e-08	2.62252	0.916641	6.78431e-15	2.41024e-14	3.60633	4.3021	24.7579	2.09012	2.41649	hypothetical protein	-	-	-	-
PDE_02597	26.3672	26.999	12.3001	-1.10008	0.800075	1.31653e-06	1.87721e-05	1.13424	0.837948	4.71933e-10	1.31231e-09	8.11974	11.1668	10.1953	10.4062	5.47133	hypothetical protein	-	-	-	-
PDE_02598	83.3165	129.641	37.6837	-1.14466	0.899337	0.000880695	0.00558843	1.78251	0.943215	3.00434e-25	1.61311e-24	30.1955	33.3419	108.024	27.0289	21.9543	hypothetical protein	-	-	-	-
PDE_02846	52.1923	62.8799	18.6759	-1.48266	0.895662	3.41713e-15	1.98377e-13	1.75142	0.924464	6.76083e-31	4.4102e-30	15.5073	18.7138	13.2459	12.305	15.9533	hypothetical protein	-	-	GO:0005097//Rab GTPase activator activity;GO:0005097//Rab GTPase activator activity;GO:0005097//Rab GTPase activator activity	GO:0032313//regulation of Rab GTPase activity;GO:0032313//regulation of Rab GTPase activity;GO:0032313//regulation of Rab GTPase activity
PDE_02857	119.526	185.246	28.5232	-2.06711	0.944763	1.68277e-35	2.93072e-33	2.69923	0.957883	6.62929e-87	1.56667e-85	20.4308	45.9282	38.3707	20.9181	18.9096	hypothetical protein	K01265|1|0.0|671|pcs:Pc14g00010|methionyl aminopeptidase [EC:3.4.11.18] (A)	-	GO:0004177//aminopeptidase activity;GO:0008235//metalloexopeptidase activity;GO:0004177//aminopeptidase activity;GO:0008235//metalloexopeptidase activity;GO:0004177//aminopeptidase activity;GO:0008235//metalloexopeptidase activity;GO:0004177//aminopeptidase activity;GO:0008235//metalloexopeptidase activity	GO:0009987//cellular process;GO:0006508//proteolysis;GO:0006508//proteolysis;GO:0006508//proteolysis;GO:0006508//proteolysis
PDE_03209	51.4568	52.1388	24.8341	-1.05104	0.863088	1.32057e-05	0.000148724	1.07003	0.881335	3.6623e-10	1.02572e-09	16.5874	20.6205	22.0545	15.4712	16.1895	hypothetical protein	K15565|1|1e-117|339|nfi:NFIA_087310|CTD kinase subunit gamma (A)	-	-	-
PDE_03369	35.9971	56.6514	12.9416	-1.47586	0.868164	4.61178e-05	0.000452047	2.13009	0.928718	3.27145e-14	1.12719e-13	16.0741	14.6447	26.6859	11.029	13.7186	hypothetical protein	K00100|4|0.0|593|afm:AFUA_2G11250|[EC:1.1.1.-] (A)	-	-	-
PDE_03496	47.9626	93.8872	19.6027	-1.29086	0.878572	1.94585e-11	7.13453e-10	2.25987	0.944296	4.54813e-53	5.42037e-52	28.7791	8.72328	18.5567	7.99014	9.82342	hypothetical protein	K00652|1|0.0|641|pcs:Pc20g13410|8-amino-7-oxononanoate synthase [EC:2.3.1.47] (A)	-	GO:0030170//pyridoxal phosphate binding;GO:0016740//transferase activity	GO:0009058//biosynthetic process;GO:0008152//metabolic process
PDE_03508	43.7174	232.529	16.964	-1.36573	0.877358	0.000208468	0.00164898	3.77686	0.966324	1.11428e-30	7.20091e-30	14.7913	13.6307	57.8819	22.1894	9.71814	hypothetical protein	-	-	-	-
PDE_03553	65.0776	32.2645	15.7577	-2.04611	0.925144	4.42125e-07	7.03432e-06	1.0339	0.842529	2.1201e-10	6.01416e-10	12.728	8.49062	35.3787	7.4304	6.99817	hypothetical protein	-	-	-	-
PDE_03558	83.0035	416.749	41.0857	-1.01454	0.885425	1.83204e-05	0.000200088	3.34247	0.968296	4.23769e-62	6.10692e-61	33.4042	26.3715	44.1084	40.0881	27.5936	hypothetical protein	K18187|1|2e-49|155|ani:AN6593.2|protein PET100, fungi type (A)	-	-	-
PDE_03591	32.4638	65.8642	15.8555	-1.03385	0.816482	1.93576e-07	3.31218e-06	2.05451	0.931978	1.86159e-45	1.84318e-44	16.6791	7.23494	13.2602	5.97214	11.7921	hypothetical protein	-	GO:0016020//membrane;GO:0016021//integral component of membrane	GO:0005215//transporter activity	GO:0006810//transport;GO:0055085//transmembrane transport;GO:0055085//transmembrane transport
PDE_03633	43.4406	58.5623	15.5854	-1.47885	0.882964	0.145579	0.30293	1.90978	0.92539	1.47705e-12	4.72703e-12	17.6917	8.52709	16.1658	8.12293	9.4947	hypothetical protein	-	-	-	-
PDE_03688	103.137	189.188	46.9604	-1.13504	0.90778	1.37641e-07	2.4452e-06	2.01031	0.952204	1.03158e-36	8.0804e-36	39.2216	44.7904	61.786	32.6195	29.2627	hypothetical protein	K02952|1|8e-73|216|aor:AOR_1_1408144|small subunit ribosomal protein S13 (A)	GO:0005840//ribosome;GO:0005622//intracellular;GO:0005840//ribosome;GO:0005622//intracellular;GO:0005840//ribosome;GO:0005622//intracellular;GO:0005840//ribosome	GO:0003723//RNA binding;GO:0003735//structural constituent of ribosome;GO:0003723//RNA binding;GO:0003735//structural constituent of ribosome;GO:0003723//RNA binding;GO:0003735//structural constituent of ribosome;GO:0003723//RNA binding;GO:0003735//structural constituent of ribosome	GO:0006412//translation;GO:0006412//translation;GO:0006412//translation;GO:0006412//translation
PDE_04036	39.3498	180.892	18.4858	-1.08994	0.844391	2.36718e-06	3.18883e-05	3.29064	0.961091	1.47881e-75	2.89008e-74	13.5613	19.5489	15.2944	28.0374	10.5095	hypothetical protein	K18156|1|1e-162|452|pcs:Pc13g05360|mitochondrial inner membrane protease ATP23 [EC:3.4.24.-] (A)	-	GO:0004222//metalloendopeptidase activity	-
PDE_04204	37.3793	86.6454	11.1787	-1.74148	0.885613	6.67212e-11	2.27529e-09	2.95436	0.948602	3.93068e-57	5.16627e-56	13.8868	7.17946	14.0656	6.43518	6.93324	hypothetical protein	K08681|1|1e-154|435|pcs:Pc13g04060|5'-phosphate synthase pdxT subunit [EC:4.3.3.6] (A)	-	-	-
PDE_04368	32.5482	30.7947	13.8084	-1.23703	0.840768	3.96384e-05	0.000395694	1.15714	0.852976	4.70366e-06	1.00987e-05	10.8124	11.3895	8.41541	8.55667	9.84124	hypothetical protein	-	GO:0016592//mediator complex	GO:0001104//RNA polymerase II transcription cofactor activity	GO:0006357//regulation of transcription from RNA polymerase II promoter
PDE_04667	32.2975	363.315	15.4606	-1.06282	0.820618	0.000129363	0.0010899	4.55455	0.974249	9.26075e-171	8.99497e-169	12.8248	15.459	24.8142	25.5633	19.5297	hypothetical protein	-	GO:0016020//membrane	-	-
PDE_04794	47.8677	41.6359	7.26319	-2.72038	0.921025	1.67113e-15	1.01233e-13	2.51915	0.922148	2.21529e-18	9.12127e-18	4.26868	7.69896	7.53371	5.74767	2.81032	hypothetical protein	-	-	-	-
PDE_04812	96.2992	177.053	42.8718	-1.1675	0.906515	0.0539127	0.144772	2.04608	0.952204	8.89312e-26	4.84458e-25	58.7033	7.35183	76.8125	3.05238	36.8947	hypothetical protein	-	GO:0016021//integral component of membrane	-	GO:0055085//transmembrane transport
PDE_05041	25.4692	45.7245	3.99902	-2.67104	0.876367	3.65573e-16	2.39291e-14	3.51525	0.934122	1.52443e-42	1.40482e-41	4.74656	2.15374	3.1911	1.07334	3.72091	hypothetical protein	-	-	-	-
PDE_05119	28.2071	26.8205	12.8999	-1.1287	0.813457	0.000235876	0.00182869	1.05598	0.827775	1.56232e-06	3.47887e-06	14.2543	6.63396	18.724	4.5927	4.43064	hypothetical protein	-	-	GO:0008080//N-acetyltransferase activity;GO:0008080//N-acetyltransferase activity	-
PDE_05173	23.5692	20.3654	9.22132	-1.35386	0.812739	3.03396e-09	7.47227e-08	1.14307	0.80772	2.97762e-09	7.91506e-09	9.66635	6.96875	4.23809	3.34073	7.61255	hypothetical protein	-	-	-	-
PDE_05336	32.0659	35.6682	13.1344	-1.2877	0.844066	6.81494e-08	1.30582e-06	1.44129	0.883102	2.06698e-20	9.18836e-20	11.3804	3.32825	5.2998	1.94369	6.79391	hypothetical protein	-	GO:0005634//nucleus;GO:0005634//nucleus;GO:0005634//nucleus;GO:0005634//nucleus	GO:0000981//sequence-specific DNA binding RNA polymerase II transcription factor activity;GO:0008270//zinc ion binding;GO:0000981//sequence-specific DNA binding RNA polymerase II transcription factor activity;GO:0008270//zinc ion binding;GO:0000981//sequence-specific DNA binding RNA polymerase II transcription factor activity;GO:0008270//zinc ion binding;GO:0000981//sequence-specific DNA binding …	GO:0006355//regulation of transcription, DNA-templated;GO:0006355//regulation of transcription, DNA-templated;GO:0006355//regulation of transcription, DNA-templated;GO:0006355//regulation of transcription, DNA-templated
PDE_05588	32.033	54.5709	13.3166	-1.26633	0.841622	7.6459e-08	1.43732e-06	2.03491	0.925493	1.81458e-30	1.16414e-29	11.3221	10.0456	15.6978	8.18825	12.3106	hypothetical protein	-	-	-	-
PDE_05704	128.977	119.245	57.4053	-1.16786	0.916291	3.20295e-12	1.3016e-10	1.05468	0.911288	3.34194e-15	1.20446e-14	55.251	45.8263	33.8999	31.791	32.4462	hypothetical protein	-	-	-	-
PDE_05750	312.281	413.426	132.527	-1.23656	0.936919	6.76339e-05	0.000628222	1.64134	0.95332	4.74152e-32	3.22058e-31	227.512	52.2697	94.2862	63.5182	176.054	hypothetical protein	-	-	-	-
PDE_05800	26.705	30.9203	9.36148	-1.5123	0.840033	2.28024e-10	6.88518e-09	1.72375	0.88806	1.1594e-18	4.84148e-18	7.47056	12.116	14.684	11.8033	5.89966	hypothetical protein	K10998|1|2e-88|269|pcs:Pc13g05650|replication fork protection complex subunit Csm3/Swi3 (A)	GO:0005634//nucleus	-	GO:0006974//cellular response to DNA damage stimulus;GO:0007049//cell cycle;GO:0048478//replication fork protection
PDE_05836	206.672	262.388	80.952	-1.3522	0.936509	5.79033e-08	1.12946e-06	1.69657	0.950798	4.48285e-36	3.46121e-35	49.3002	58.0037	105.436	82.6123	47.9137	putative hyaluronan synthase	-	-	-	-
PDE_05905	44.5719	41.1901	18.2475	-1.28844	0.873496	4.05907e-12	1.62914e-10	1.1746	0.876205	7.44321e-15	2.63661e-14	10.9963	14.0478	12.7892	12.5244	10.7497	hypothetical protein	-	-	-	-
PDE_06072	70.5664	213.195	30.3509	-1.21724	0.896859	0.0157348	0.0558828	2.81236	0.960079	1.53381e-43	1.4478e-42	26.1801	19.1971	202.255	31.4583	22.5159	hypothetical protein	-	-	-	-
PDE_06126	217.141	65.7252	11.673	-4.21739	0.968656	1.65097e-10	5.12799e-09	2.49328	0.937451	4.54038e-08	1.11902e-07	49.4599	4.74381	66.1039	2.10446	22.9429	hypothetical protein	-	-	-	-
PDE_06134	36.0363	40.1185	17.9709	-1.00379	0.822105	0.00279371	0.0142804	1.1586	0.873769	1.12923e-05	2.35521e-05	17.2429	17.5643	18.6734	14.2184	13.874	hypothetical protein	-	-	-	-
PDE_06195	122.005	102.852	49.1799	-1.3108	0.922683	2.59794e-10	7.72491e-09	1.06442	0.907205	8.67718e-10	2.38016e-09	43.1777	44.3657	44.621	34.0707	33.37	hypothetical protein	K14411|5|3e-09|57.0|ang:ANI_1_2030024|RNA-binding protein Musashi (A)	-	-	-
PDE_06200	41.1655	38.2387	15.9263	-1.37002	0.87312	4.70003e-11	1.63129e-09	1.26362	0.877938	5.7043e-13	1.87056e-12	15.6266	10.1171	14.6914	7.19623	12.332	hypothetical protein	-	-	-	-
PDE_06225	200.107	108.102	47.609	-2.07147	0.954693	5.47882e-08	1.07732e-06	1.18309	0.917413	4.50585e-12	1.40725e-11	40.8307	40.9791	48.8534	25.7915	45.6276	hypothetical protein	-	-	-	-
PDE_06229	19.072	20.5443	6.10649	-1.64304	0.807715	3.06908e-09	7.53973e-08	1.75033	0.853594	4.78895e-14	1.64017e-13	5.44047	3.8435	3.6205	3.16363	2.9058	hypothetical protein	K15508|1|1e-145|412|pcs:Pc21g11390|21S rRNA (uridine2791-2'-O)-methyltransferase [EC:2.1.1.168] (A)	-	-	-
PDE_06289	56.2583	63.9383	25.5664	-1.13781	0.878401	2.03005e-08	4.38032e-07	1.32243	0.908029	1.94986e-16	7.39515e-16	27.2153	10.7651	16.7906	7.8139	9.93316	hypothetical protein	K04082|1|4e-120|348|pcs:Pc20g09290|molecular chaperone HscB (A)	-	-	-
PDE_06299	93.6504	79.3591	30.7048	-1.60882	0.928117	1.09639e-12	4.75249e-11	1.36993	0.917499	5.86245e-12	1.82098e-11	27.9605	20.4654	22.0263	13.9738	19.3663	hypothetical protein	-	-	-	-
PDE_06397	39.59	463.032	10.0981	-1.97105	0.896295	6.15843e-09	1.4508e-07	5.51895	0.984406	3.63337e-209	4.97055e-207	3.00773	7.38095	4.25569	8.01282	7.90948	hypothetical protein	-	-	-	-
PDE_06435	51.2392	221.726	5.92781	-3.11168	0.927656	1.19911e-12	5.15194e-11	5.22514	0.976274	9.67747e-230	1.70904e-227	7.21448	1.85544	51.4203	4.62084	1.43428	hypothetical protein	-	-	-	-
PDE_06802	271.355	4188.07	128.612	-1.07716	0.925485	2.08679e-07	3.54572e-06	5.02519	0.982484	3.05279e-275	8.98537e-273	53.2531	220.259	146.628	110.666	40.7254	hypothetical protein	-	-	-	-
PDE_06838	35.964	34.7167	15.4068	-1.22299	0.849655	8.55654e-11	2.8385e-09	1.17206	0.864042	1.70365e-14	5.93101e-14	10.0076	13.6723	10.6261	16.1061	11.0016	hypothetical protein	-	GO:0000775//chromosome, centromeric region;GO:0005634//nucleus	-	GO:0045132//meiotic chromosome segregation
PDE_06884	89.1272	367.848	25.6394	-1.79751	0.931723	5.2639e-16	3.35548e-14	3.84268	0.970029	2.02696e-169	1.9493e-167	13.448	9.3294	22.2726	35.6618	14.0413	hypothetical protein	-	GO:0016021//integral component of membrane	-	GO:0055085//transmembrane transport
PDE_06885	81.9807	449.204	16.7509	-2.29105	0.938013	2.90747e-36	5.3503e-34	4.74506	0.9766	5.65621e-225	9.31166e-223	11.8396	5.91491	16.4728	18.5181	12.5562	hypothetical protein	-	-	-	-
PDE_06887	83.2481	347.914	31.3768	-1.40772	0.914274	1.62492e-15	9.90492e-14	3.47096	0.967816	9.32763e-141	5.77065e-139	20.605	14.3273	23.3004	26.504	21.0985	hypothetical protein	-	-	GO:0016491//oxidoreductase activity;GO:0016491//oxidoreductase activity;GO:0016491//oxidoreductase activity;GO:0016491//oxidoreductase activity	GO:0008152//metabolic process;GO:0008152//metabolic process;GO:0008152//metabolic process;GO:0008152//metabolic process
PDE_07066	76.2382	212.958	34.5568	-1.14154	0.895338	1.39778e-06	1.98147e-05	2.62353	0.959084	1.72804e-56	2.22017e-55	29.081	26.5907	33.3113	19.8648	16.4149	hypothetical protein	K18183|1|1e-55|171|pcs:Pc16g06310|cytochrome c oxidase assembly protein subunit 19 (A)	-	-	-
PDE_07327	110.615	156.845	54.5241	-1.02058	0.897559	8.61923e-09	1.97332e-07	1.52437	0.938326	5.61968e-30	3.54211e-29	46.336	45.7516	63.6185	41.9163	32.4712	hypothetical protein	K11093|1|4e-134|393|nfi:NFIA_073580|U1 small nuclear ribonucleoprotein 70kDa (A)	-	-	-
PDE_07397	51.3673	78.1602	21.2343	-1.27445	0.881836	6.31875e-06	7.60824e-05	1.88004	0.93311	2.79137e-26	1.55462e-25	18.766	19.9409	19.5125	15.5116	16.6547	hypothetical protein	K09647|1|3e-85|252|afm:AFUA_5G12820|mitochondrial inner membrane protease subunit 1 [EC:3.4.21.-] (A)	-	-	-
PDE_07465	56.2622	65.5456	24.3926	-1.20572	0.883357	2.23325e-05	0.000237006	1.42606	0.91309	1.22984e-10	3.54254e-10	21.7251	19.4451	18.3866	15.5872	11.9076	hypothetical protein	-	-	-	-
PDE_07645	57.4643	47.7489	8.87711	-2.6945	0.928681	5.2443e-21	4.96579e-19	2.4273	0.926677	5.85509e-20	2.56173e-19	5.98409	8.54959	7.59911	3.954	7.64129	hypothetical protein	-	-	-	-
PDE_07687	27.5622	32.9776	12.1798	-1.1782	0.815422	0.00446213	0.0207927	1.437	0.87732	1.31501e-06	2.94573e-06	10.2163	5.39149	10.6148	3.47722	8.72062	hypothetical protein	-	-	-	-
PDE_07736	29.9598	38.4445	14.3987	-1.05709	0.810928	2.65599e-06	3.53878e-05	1.41684	0.887253	2.98887e-08	7.44001e-08	15.0884	13.2427	27.1659	17.5455	8.93014	hypothetical protein	-	-	-	-
PDE_07850	32.9221	31.0289	15.3143	-1.10418	0.82783	4.21113e-07	6.72196e-06	1.01873	0.836336	1.78907e-08	4.52061e-08	10.9724	9.83105	14.9498	8.25335	8.60599	hypothetical protein	-	-	-	-
PDE_07868	68.0426	219.213	23.2815	-1.54725	0.912121	7.32948e-07	1.1222e-05	3.23508	0.962944	2.89211e-93	8.02601e-92	8.10726	1.60979	1.4961	0.440726	8.98874	hypothetical protein	K00706|1|4e-06|50.8|mtm:MYCTH_140260|1,3-beta-glucan synthase [EC:2.4.1.34] (A)	-	-	-
PDE_08001	79.0434	109.504	35.9457	-1.13683	0.897115	0.00685375	0.0293379	1.60709	0.935598	1.02691e-24	5.38862e-24	24.9604	42.5186	40.5466	29.7792	18.0279	hypothetical protein	-	-	-	-
PDE_08110	96.0084	103.737	41.4429	-1.21204	0.909403	5.02798e-13	2.25981e-11	1.32374	0.923246	8.04904e-24	4.09965e-23	64.9359	14.0948	25.6154	13.3421	40.8555	hypothetical protein	K01907|1|0.0|1144|pcs:Pc22g00960|acetoacetyl-CoA synthetase [EC:6.2.1.16] (A)	-	GO:0003824//catalytic activity;GO:0030729//acetoacetate-CoA ligase activity	GO:0008152//metabolic process;GO:0006629//lipid metabolic process
PDE_08180	93.0664	129.261	46.4587	-1.00231	0.888416	1.105e-08	2.50049e-07	1.47627	0.933025	4.81327e-24	2.47361e-23	67.1677	34.0074	68.9286	12.7383	80.735	hypothetical protein	-	-	GO:0008762//UDP-N-acetylmuramate dehydrogenase activity;GO:0016491//oxidoreductase activity;GO:0050660//flavin adenine dinucleotide binding;GO:0016491//oxidoreductase activity;GO:0050660//flavin adenine dinucleotide binding;GO:0003824//catalytic activity;GO:0016614//oxidoreductase activity, acting on CH-OH group of donors;GO:0050660//flavin adenine dinucleotide binding	GO:0055114//oxidation-reduction process;GO:0055114//oxidation-reduction process;GO:0055114//oxidation-reduction process
PDE_08267	82.4243	263.511	40.6237	-1.02075	0.885528	5.86818e-06	7.15405e-05	2.69747	0.961657	1.52211e-69	2.59372e-68	37.0243	32.7161	60.9371	28.3495	24.9154	hypothetical protein	-	-	-	-
PDE_08341	42.4912	147.31	20.8447	-1.02748	0.843981	0.000255766	0.00195646	2.8211	0.956253	1.94215e-34	1.42586e-33	14.4704	17.5236	20.0172	11.7425	9.28073	hypothetical protein	-	-	-	-
PDE_08379	37.8295	16.1102	4.78995	-2.98143	0.910907	3.85709e-35	6.37597e-33	1.74989	0.826523	4.88962e-12	1.52416e-11	2.40259	3.64396	2.29128	1.64999	3.78634	hypothetical protein	-	-	-	-
PDE_08591	40.1837	39.1581	18.8304	-1.09354	0.846476	3.71843e-07	5.99436e-06	1.05624	0.861829	2.77574e-09	7.39056e-09	20.9519	17.6622	13.485	21.1539	24.0047	hypothetical protein	-	-	-	-
PDE_08592	25.5176	23.9562	11.6286	-1.13381	0.800827	0.000113089	0.000970389	1.04272	0.814119	2.19289e-05	4.46343e-05	13.9258	10.9832	8.87641	13.1965	16.8561	hypothetical protein	-	-	-	-
PDE_08597	30.6668	32.3333	13.0041	-1.23771	0.834273	5.10328e-05	0.000495128	1.31405	0.86888	3.38931e-09	8.97258e-09	9.43703	13.1382	10.0695	12.6282	8.23835	hypothetical protein	K10734|1|2e-120|341|afv:AFLA_027620|GINS complex subunit 3 (A)	-	-	-
PDE_08777	60.223	82.4586	25.5476	-1.23712	0.889578	1.04317e-07	1.90883e-06	1.69048	0.931412	6.95464e-28	4.09397e-27	18.8963	20.4802	38.5165	17.6463	15.1007	hypothetical protein	-	-	-	-
PDE_08780	38.197	38.3581	14.6212	-1.3854	0.867429	5.70938e-10	1.6001e-08	1.39147	0.885435	2.01959e-13	6.76889e-13	12.1813	12.6413	14.6342	8.43924	10.3682	hypothetical protein	-	-	-	-
PDE_08785	26.2312	73.2535	11.5992	-1.17726	0.808774	7.47917e-05	0.000684513	2.65887	0.942289	1.79891e-27	1.04191e-26	7.96539	10.7263	35.1214	14.2891	6.4445	hypothetical protein	-	-	-	-
PDE_08852	37.029	42.032	11.6343	-1.67027	0.881631	3.70549e-09	9.01239e-08	1.8531	0.910311	5.79004e-22	2.73934e-21	12.1385	6.19867	8.9627	2.88077	5.24556	hypothetical protein	-	-	GO:0008080//N-acetyltransferase activity;GO:0008080//N-acetyltransferase activity	-
PDE_09072	60.6145	167.547	24.1871	-1.32542	0.895714	1.47173e-07	2.57693e-06	2.79225	0.95742	2.77685e-76	5.48202e-75	21.2373	19.9911	34.7124	12.7399	13.7783	hypothetical protein	-	-	-	-
PDE_09084	244.208	1040.96	103.544	-1.23787	0.933979	0.0164334	0.0576464	3.3296	0.970973	1.62184e-34	1.1934e-33	70.6243	66.8343	804.49	278.92	72.9584	hypothetical protein	-	-	-	-
PDE_09162	45.6475	60.6767	21.2242	-1.10483	0.859448	1.78288e-06	2.45253e-05	1.51543	0.913896	7.58331e-18	3.05883e-17	16.6864	16.5196	20.5684	12.0105	17.4498	hypothetical protein	-	-	-	-
PDE_09169	80.4566	76.5494	32.8722	-1.29134	0.907096	2.63253e-09	6.58335e-08	1.21952	0.908972	1.0002e-11	3.07142e-11	19.802	24.5272	21.81	25.5259	23.2067	hypothetical protein	-	-	-	-
PDE_09225	79.6114	59.9084	17.1044	-2.2186	0.935962	0.000209257	0.00165231	1.80839	0.923949	3.06472e-08	7.62294e-08	7.09687	2.65724	8.57518	3.0184	8.0164	hypothetical protein	-	-	-	-
PDE_09307	53.8438	70.7868	26.518	-1.02181	0.860576	6.9266e-08	1.32461e-06	1.41651	0.915732	7.79599e-23	3.81666e-22	19.7765	17.8813	21.2719	16.5485	18.4576	hypothetical protein	-	-	GO:0003676//nucleic acid binding;GO:0046872//metal ion binding;GO:0003676//nucleic acid binding	-
PDE_09481	82.5811	446.265	40.5873	-1.02478	0.885767	3.32372e-06	4.32793e-05	3.4588	0.969034	1.2323e-117	5.51581e-116	29.5023	29.4221	49.8966	63.4639	24.5503	hypothetical protein	-	-	-	-
PDE_09496	48.2726	200.241	23.969	-1.01004	0.851518	0.00012922	0.0010899	3.0625	0.960988	1.77527e-33	1.26047e-32	30.5649	7.48881	18.7123	6.0248	22.509	hypothetical protein	-	-	GO:0016491//oxidoreductase activity	GO:0008152//metabolic process
PDE_09800	93.3239	95.666	45.7974	-1.02698	0.893424	7.61735e-08	1.43698e-06	1.06274	0.905318	6.6293e-13	2.1673e-12	34.5066	30.7062	31.2027	26.7969	23.229	hypothetical protein	K12870|1|4e-152|427|afv:AFLA_099860|pre-mRNA-splicing factor ISY1 (A)	-	-	-
PDE_09805	58.7905	46.8869	11.9094	-2.30349	0.925092	1.13367e-15	6.95386e-14	1.97709	0.918133	1.33217e-27	7.76674e-27	3.92373	1.93286	36.2849	2.85916	3.24651	hypothetical protein	-	-	-	-
