# Supplementary material for: Synergistic and Dose-Controlled Regulation of Cellulase Gene Expression in Penicillium oxalicum
Source: PLoS Genet. 2015 Sep 11;11(9):e1005509. doi: 10.1371/journal.pgen.1005509 (PMC4567317; doi:10.1371/journal.pgen.1005509)
Supplement: S8 Table — (XLSX) [file pgen.1005509.s019.xlsx]

## Sheet: 579 genes
GeneID	Means (Wild-type on Cellulose)	Means (ΔclrB on Cellulose)	Means (ΔcreA on Cellulose)	Means (ΔcreA-ΔclrB on Cellulose)	Means (ΔamyR on Cellulose)	log2Ratio(ΔamyR/Wild-type)	Probability (ΔamyR/Wild-type)	P-value (ΔamyR/Wild-type)	FDR (ΔamyR/Wild-type)	Description	KEGG Orthology	GO Component	GO Function	GO Process
PDE_00008	183.845	69.4866	329.994	296.742	26.9244	-2.7715	0.955126	4.96966e-08	1.18133e-06	hypothetical protein	K01735|1|0.0|767|act:ACLA_055850|3-dehydroquinate synthase [EC:4.2.3.4] (A)	-	-	-
PDE_00009	124.298	55.0116	97.5749	137.073	33.9932	-1.87049	0.939535	1.55412e-10	6.0724e-09	hypothetical protein	K00545|1|1e-157|444|act:ACLA_055840|catechol O-methyltransferase [EC:2.1.1.6] (A)	-	GO:0016206//catechol O-methyltransferase activity;GO:0008171//O-methyltransferase activity	-
PDE_00021	3297.4	2460.9	4854.75	1592.5	1024.37	-1.68659	0.957302	2.97991e-15	2.33814e-13	hypothetical protein	-	GO:0009277//fungal-type cell wall;GO:0009277//fungal-type cell wall	GO:0005199//structural constituent of cell wall;GO:0005199//structural constituent of cell wall	-
PDE_00080	37.716	32.3805	60.0235	25.0641	14.9882	-1.33135	0.865931	1.78282e-05	0.000247568	hypothetical protein	-	-	-	-
PDE_00081	50.8009	47.2658	89.4533	33.7342	16.8625	-1.59104	0.900722	5.41949e-11	2.35601e-09	hypothetical protein	-	-	GO:0003824//catalytic activity	GO:0008152//metabolic process
PDE_00082	104.892	135.934	175.289	61.8756	48.7383	-1.10577	0.902638	5.24258e-05	0.000629936	hypothetical protein	-	-	GO:0008146//sulfotransferase activity	-
PDE_00095	59.9606	45.8376	54.5398	19.8605	29.589	-1.01896	0.867658	0.0116952	0.0563286	hypothetical protein	-	-	-	-
PDE_00121	12.847	2.70451	3.45074	5.74552	1.81726	-2.82159	0.80652	1.20731e-05	0.000176274	hypothetical protein	-	-	GO:0016791//phosphatase activity;GO:0016791//phosphatase activity	GO:0008152//metabolic process
PDE_00155	126.769	88.0839	137.133	122.773	63.1045	-1.00638	0.898218	0.00246183	0.0161079	hypothetical protein	K17784|1|3e-55|169|pcs:Pc13g12160|mitochondrial inner membrane organizing system protein 1 (A)	-	-	-
PDE_00206	76.3776	51.9138	111.639	121.349	29.8449	-1.35566	0.909009	6.05766e-07	1.17868e-05	hypothetical protein	K11129|1|5e-106|308|pcs:Pc13g12610|H/ACA ribonucleoprotein complex subunit 2 (A)	GO:0030529//ribonucleoprotein complex	-	GO:0042254//ribosome biogenesis
PDE_00223	109.806	143.089	98.5104	78.2871	25.929	-2.08232	0.941141	0.0633393	0.195988	hypothetical protein	K13830|1|0.0|2877|pcs:Pc16g12160|pentafunctional AROM polypeptide [EC:4.2.3.4 4.2.1.10 1.1.1.25 2.7.1.71 2.5.1.19] (A)	GO:0005737//cytoplasm;GO:0005737//cytoplasm;GO:0005737//cytoplasm	GO:0003856//3-dehydroquinate synthase activity;GO:0003866//3-phosphoshikimate 1-carboxyvinyltransferase activity;GO:0003855//3-dehydroquinate dehydratase activity;GO:0003855//3-dehydroquinate dehydratase activity;GO:0003856//3-dehydroquinate synthase activity;GO:0003866//3-phosphoshikimate 1-carboxyvinyltransferase activity;GO:0004764//shikimate 3-dehydrogenase (NADP+) activity;GO:0004765//shikim…	GO:0009073//aromatic amino acid family biosynthetic process;GO:0009073//aromatic amino acid family biosynthetic process;GO:0055114//oxidation-reduction process;GO:0009073//aromatic amino acid family biosynthetic process;GO:0055114//oxidation-reduction process;GO:0055114//oxidation-reduction process
PDE_00224	88.0966	71.1707	47.7086	73.5287	32.34	-1.44577	0.917211	1.72611e-09	5.44403e-08	hypothetical protein	-	-	GO:0016705//oxidoreductase activity, acting on paired donors, with incorporation or reduction of molecular oxygen;GO:0005506//iron ion binding;GO:0009055//electron carrier activity;GO:0016705//oxidoreductase activity, acting on paired donors, with incorporation or reduction of molecular oxygen;GO:0020037//heme binding;GO:0005506//iron ion binding;GO:0016705//oxidoreductase activity, acting on pai…	GO:0055114//oxidation-reduction process;GO:0055114//oxidation-reduction process;GO:0055114//oxidation-reduction process;GO:0055114//oxidation-reduction process;GO:0055114//oxidation-reduction process;GO:0055114//oxidation-reduction process;GO:0055114//oxidation-reduction process;GO:0055114//oxidation-reduction process;GO:0055114//oxidation-reduction process;GO:0055114//oxidation-reduction process…
PDE_00226	164.454	112.546	97.6963	129.861	54.6554	-1.58925	0.937463	6.78915e-12	3.48522e-10	hypothetical protein	-	-	-	-
PDE_00232	2193.27	1609.64	1914.43	2357.72	975.724	-1.16854	0.936842	3.27872e-06	5.37232e-05	hypothetical protein	K11254|1|5e-67|200|afv:AFLA_017620|histone H4 (A)	GO:0000786//nucleosome;GO:0005634//nucleus;GO:0000786//nucleosome;GO:0005634//nucleus;GO:0005634//nucleus;GO:0000786//nucleosome;GO:0005634//nucleus;GO:0000786//nucleosome;GO:0005634//nucleus;GO:0000786//nucleosome;GO:0005634//nucleus;GO:0000786//nucleosome;GO:0005634//nucleus;GO:0000786//nucleosome;GO:0005634//nucleus;GO:0000786//nucleosome;GO:0005634//nucleus	GO:0003677//DNA binding;GO:0003677//DNA binding;GO:0003677//DNA binding;GO:0003677//DNA binding;GO:0003677//DNA binding;GO:0003677//DNA binding;GO:0003677//DNA binding;GO:0003677//DNA binding;GO:0003677//DNA binding	GO:0006334//nucleosome assembly;GO:0006334//nucleosome assembly;GO:0006352//DNA-templated transcription, initiation;GO:0006334//nucleosome assembly;GO:0006334//nucleosome assembly;GO:0006334//nucleosome assembly;GO:0006334//nucleosome assembly;GO:0006334//nucleosome assembly;GO:0006334//nucleosome assembly
PDE_00248	79.183	31.3558	41.8967	12.3165	20.5868	-1.94347	0.92959	1.64918e-09	5.2356e-08	SUN domain-containing protein	K01238|4|2e-162|472|afm:AFUA_1G13940|[EC:3.2.1.-] (A)	-	-	-
PDE_00253	36.4527	37.1398	25.8428	36.9899	16.6115	-1.13384	0.845644	0.000862666	0.00679086	hypothetical protein	-	-	-	-
PDE_00266	44.0537	32.5863	46.1946	58.9588	21.1241	-1.06037	0.85274	0.000290769	0.00273311	hypothetical protein	K17807|1|0.0|722|pcs:Pc16g12620|mitochondrial translocator assembly and maintenance protein 41 (A)	-	-	-
PDE_00272	35.8863	30.9551	21.1724	28.1835	16.3213	-1.13668	0.844815	0.00434082	0.025876	hypothetical protein	-	-	-	-
PDE_00274	23.2056	14.9378	18.6653	17.1982	8.35267	-1.47416	0.828844	2.54116e-05	0.000336878	hypothetical protein	-	-	-	-
PDE_00286	70.4372	54.9375	103.773	131.202	33.1493	-1.08736	0.886132	0.000430689	0.00382039	hypothetical protein	K14563|1|2e-162|459|ang:ANI_1_1646014|rRNA 2'-O-methyltransferase fibrillarin [EC:2.1.1.-] (A)	-	GO:0003723//RNA binding;GO:0008168//methyltransferase activity;GO:0003723//RNA binding;GO:0008168//methyltransferase activity;GO:0003723//RNA binding;GO:0008168//methyltransferase activity;GO:0003723//RNA binding;GO:0008168//methyltransferase activity;GO:0003723//RNA binding;GO:0008168//methyltransferase activity;GO:0003723//RNA binding;GO:0008168//methyltransferase activity;GO:0003723//RNA bindi…	GO:0006364//rRNA processing;GO:0008033//tRNA processing;GO:0006364//rRNA processing;GO:0008033//tRNA processing;GO:0006364//rRNA processing;GO:0008033//tRNA processing;GO:0006364//rRNA processing;GO:0008033//tRNA processing;GO:0006364//rRNA processing;GO:0008033//tRNA processing;GO:0006364//rRNA processing;GO:0008033//tRNA processing;GO:0006364//rRNA processing;GO:0008033//tRNA processing;GO:0006…
PDE_00304	266.4	149.907	502.102	335.839	105.125	-1.34149	0.934476	4.89862e-08	1.17021e-06	hypothetical protein	K02880|1|1e-116|332|pcs:Pc16g12990|large subunit ribosomal protein L17e (A)	GO:0005622//intracellular;GO:0005840//ribosome;GO:0015934//large ribosomal subunit;GO:0005840//ribosome	GO:0003735//structural constituent of ribosome;GO:0003735//structural constituent of ribosome;GO:0003735//structural constituent of ribosome	GO:0006412//translation;GO:0006412//translation;GO:0006412//translation
PDE_00305	25.4892	17.9596	39.9446	21.1855	6.04989	-2.07491	0.868107	4.49397e-06	7.19259e-05	hypothetical protein	-	-	-	-
PDE_00374	231.216	126.384	470.533	290.415	91.5658	-1.33636	0.933216	3.04262e-08	7.66693e-07	hypothetical protein	K02932|1|0.0|549|act:ACLA_022570|large subunit ribosomal protein L5e (A)	GO:0005622//intracellular;GO:0005840//ribosome;GO:0005622//intracellular;GO:0005840//ribosome;GO:0005622//intracellular;GO:0005840//ribosome;GO:0005622//intracellular;GO:0005840//ribosome;GO:0005622//intracellular;GO:0005840//ribosome;GO:0005622//intracellular;GO:0005840//ribosome;GO:0005622//intracellular;GO:0005840//ribosome	GO:0003735//structural constituent of ribosome;GO:0003735//structural constituent of ribosome;GO:0008097//5S rRNA binding;GO:0003735//structural constituent of ribosome;GO:0008097//5S rRNA binding;GO:0003735//structural constituent of ribosome;GO:0008097//5S rRNA binding;GO:0003735//structural constituent of ribosome;GO:0008097//5S rRNA binding;GO:0003735//structural constituent of ribosome;GO:00…	GO:0006412//translation;GO:0006412//translation;GO:0006412//translation;GO:0006412//translation;GO:0006412//translation;GO:0006412//translation;GO:0006412//translation
PDE_00400	798.024	287.445	690.317	314.561	246.017	-1.69768	0.954246	1.77356e-15	1.4146e-13	putative alpha-glucosidase	K01187|1|0.0|1297|afm:AFUA_1G16250|alpha-glucosidase [EC:3.2.1.20] (A)	-	GO:0004553//hydrolase activity, hydrolyzing O-glycosyl compounds;GO:0004553//hydrolase activity, hydrolyzing O-glycosyl compounds	GO:0005975//carbohydrate metabolic process;GO:0005975//carbohydrate metabolic process
PDE_00404	38.7927	36.7716	55.6267	64.193	14.4387	-1.42585	0.874771	3.55165e-08	8.78896e-07	hypothetical protein	K01649|1|0.0|1139|pcs:Pc21g23240|2-isopropylmalate synthase [EC:2.3.3.13] (A)	-	GO:0003852//2-isopropylmalate synthase activity;GO:0046912//transferase activity, transferring acyl groups, acyl groups converted into alkyl on transfer;GO:0046912//transferase activity, transferring acyl groups, acyl groups converted into alkyl on transfer;GO:0003824//catalytic activity;GO:0003852//2-isopropylmalate synthase activity;GO:0003824//catalytic activity;GO:0003852//2-isopropylmalate s…	GO:0009098//leucine biosynthetic process;GO:0019752//carboxylic acid metabolic process;GO:0019752//carboxylic acid metabolic process;GO:0009098//leucine biosynthetic process;GO:0009098//leucine biosynthetic process;GO:0009098//leucine biosynthetic process
PDE_00406	451.422	260.138	958.478	548.086	178.655	-1.3373	0.939363	2.19774e-08	5.59642e-07	hypothetical protein	K02989|1|5e-124|353|cim:CIMG_03305|small subunit ribosomal protein S5e (A)	GO:0015935//small ribosomal subunit	GO:0003723//RNA binding;GO:0003735//structural constituent of ribosome;GO:0003735//structural constituent of ribosome	GO:0006412//translation;GO:0006412//translation
PDE_00444	216.525	202.927	232.352	465.649	82.6141	-1.39008	0.935115	0.000799606	0.00637242	hypothetical protein	K15102|1|0.0|523|pcs:Pc06g01110|solute carrier family 25 (mitochondrial phosphate transporter), member 3 (A)	-	-	GO:0055085//transmembrane transport;GO:0055085//transmembrane transport;GO:0055085//transmembrane transport;GO:0055085//transmembrane transport;GO:0055085//transmembrane transport
PDE_00454	33.0181	48.4206	15.434	8.89051	7.73815	-2.0932	0.89019	0.093529	0.25849	hypothetical protein	-	-	GO:0046872//metal ion binding;GO:0046872//metal ion binding;GO:0003700//sequence-specific DNA binding transcription factor activity;GO:0043565//sequence-specific DNA binding;GO:0046872//metal ion binding;GO:0003677//DNA binding;GO:0003700//sequence-specific DNA binding transcription factor activity;GO:0043565//sequence-specific DNA binding	GO:0006355//regulation of transcription, DNA-templated;GO:0006355//regulation of transcription, DNA-templated;GO:0006355//regulation of transcription, DNA-templated
PDE_00455	511.343	734.083	192.408	120.93	82.7776	-2.62698	0.963017	0.137907	0.335673	hypothetical protein	K01866|1|0.0|600|ani:AN0057.2|tyrosyl-tRNA synthetase [EC:6.1.1.1] (A)	GO:0005737//cytoplasm;GO:0005737//cytoplasm;GO:0005737//cytoplasm;GO:0005737//cytoplasm;GO:0005737//cytoplasm	GO:0000166//nucleotide binding;GO:0004831//tyrosine-tRNA ligase activity;GO:0005524//ATP binding;GO:0000166//nucleotide binding;GO:0004812//aminoacyl-tRNA ligase activity;GO:0005524//ATP binding;GO:0000166//nucleotide binding;GO:0004831//tyrosine-tRNA ligase activity;GO:0005524//ATP binding;GO:0000166//nucleotide binding;GO:0004831//tyrosine-tRNA ligase activity;GO:0005524//ATP binding;GO:0000166…	GO:0006437//tyrosyl-tRNA aminoacylation;GO:0006418//tRNA aminoacylation for protein translation;GO:0006437//tyrosyl-tRNA aminoacylation;GO:0006437//tyrosyl-tRNA aminoacylation;GO:0006437//tyrosyl-tRNA aminoacylation;GO:0006437//tyrosyl-tRNA aminoacylation
PDE_00487	22.8263	17.051	15.1237	14.7563	9.50802	-1.26348	0.809282	0.000107153	0.00118404	hypothetical protein	-	-	-	-
PDE_00491	348.909	198.791	753.956	416.423	121.397	-1.52312	0.943696	6.85769e-11	2.92848e-09	hypothetical protein	K02957|1|6e-93|268|pcs:Pc16g14740|small subunit ribosomal protein S15Ae (A)	GO:0005840//ribosome;GO:0005840//ribosome	GO:0003735//structural constituent of ribosome;GO:0003735//structural constituent of ribosome	GO:0006412//translation;GO:0006412//translation
PDE_00537	269.253	426.08	32.1098	119.391	108.292	-1.31403	0.93344	0.00186616	0.0128553	hypothetical protein	K00257|1|0.0|800|pcs:Pc16g13490|[EC:1.3.99.-] (A)	-	GO:0003995//acyl-CoA dehydrogenase activity;GO:0003995//acyl-CoA dehydrogenase activity;GO:0016627//oxidoreductase activity, acting on the CH-CH group of donors;GO:0003995//acyl-CoA dehydrogenase activity;GO:0003995//acyl-CoA dehydrogenase activity	GO:0055114//oxidation-reduction process;GO:0055114//oxidation-reduction process;GO:0055114//oxidation-reduction process;GO:0055114//oxidation-reduction process;GO:0055114//oxidation-reduction process
PDE_00538	34.32	13.9893	10.5096	7.22201	9.8027	-1.8078	0.884526	4.09231e-08	9.94834e-07	hypothetical protein	-	-	GO:0003700//sequence-specific DNA binding transcription factor activity;GO:0043565//sequence-specific DNA binding	GO:0006355//regulation of transcription, DNA-templated
PDE_00542	26.1587	15.1155	110.749	33.8339	11.4406	-1.19313	0.817984	0.000200542	0.00199735	hypothetical protein	K00052|1|0.0|679|afv:AFLA_083640|3-isopropylmalate dehydrogenase [EC:1.1.1.85] (A)	GO:0005737//cytoplasm	GO:0003862//3-isopropylmalate dehydrogenase activity;GO:0000287//magnesium ion binding;GO:0016616//oxidoreductase activity, acting on the CH-OH group of donors, NAD or NADP as acceptor;GO:0051287//NAD binding;GO:0016616//oxidoreductase activity, acting on the CH-OH group of donors, NAD or NADP as acceptor	GO:0009098//leucine biosynthetic process;GO:0055114//oxidation-reduction process;GO:0055114//oxidation-reduction process;GO:0055114//oxidation-reduction process
PDE_00552	108.497	47.2079	533.591	75.7936	29.2532	-1.89099	0.93736	1.63977e-12	9.04311e-11	hypothetical protein	-	-	-	-
PDE_00592	27.9519	23.4527	11.9073	46.3204	10.8951	-1.35927	0.840792	0.00209231	0.0141622	hypothetical protein	-	GO:0016021//integral component of membrane	-	GO:0055085//transmembrane transport
PDE_00599	49.1578	9.14401	19.1033	13.3602	15.9798	-1.62117	0.900601	1.01645e-10	4.17435e-09	hypothetical protein	-	GO:0016020//membrane	GO:0004888//transmembrane signaling receptor activity	GO:0007166//cell surface receptor signaling pathway
PDE_00608	30.5384	17.9395	27.1464	16.1703	14.6815	-1.05663	0.818416	0.0013012	0.00965993	hypothetical protein	-	-	-	-
PDE_00629	476.417	253.689	912.132	574.85	174.791	-1.44659	0.943714	3.80761e-10	1.39864e-08	hypothetical protein	K02934|1|1e-125|356|pcs:Pc13g08880|large subunit ribosomal protein L6e (A)	GO:0005622//intracellular;GO:0005840//ribosome	GO:0003735//structural constituent of ribosome	GO:0006412//translation
PDE_00710	144.774	242.914	59.3998	860.834	61.1848	-1.24256	0.920923	0.0178623	0.0778983	hypothetical protein	-	-	-	-
PDE_00723	87.5255	67.517	115.126	110.926	39.3755	-1.15241	0.900601	1.77209e-05	0.000246779	hypothetical protein	K02358|1|0.0|813|pcs:Pc12g15010|elongation factor Tu (A)	GO:0005622//intracellular	GO:0003924//GTPase activity;GO:0005525//GTP binding;GO:0003924//GTPase activity;GO:0005525//GTP binding;GO:0003924//GTPase activity;GO:0005525//GTP binding;GO:0003924//GTPase activity;GO:0005525//GTP binding;GO:0003924//GTPase activity;GO:0005525//GTP binding;GO:0003746//translation elongation factor activity;GO:0005525//GTP binding;GO:0005525//GTP binding;GO:0003924//GTPase activity;GO:0005525//…	GO:0006414//translational elongation
PDE_00734	35.0012	23.937	34.7165	61.3965	13.0619	-1.42204	0.866225	0.000122208	0.00132366	hypothetical protein	K02990|3|4e-76|224|nfi:NFIA_013450|small subunit ribosomal protein S6 (A)	GO:0005840//ribosome;GO:0005840//ribosome	GO:0003735//structural constituent of ribosome;GO:0019843//rRNA binding;GO:0003735//structural constituent of ribosome;GO:0019843//rRNA binding	GO:0006412//translation;GO:0006412//translation
PDE_00748	37.3538	30.3396	42.6664	38.5843	17.6966	-1.07778	0.841673	0.000525329	0.00454001	hypothetical protein	K07008|1|0.0|659|pcs:Pc12g15200|glutamine amidotransferase (A)	-	-	-
PDE_00768	107.604	91.5662	110.271	128.217	53.6703	-1.00354	0.891191	0.00221431	0.0148405	hypothetical protein	K17769|1|5e-78|231|pcs:Pc13g10830|mitochondrial import receptor subunit TOM22 (A)	GO:0005741//mitochondrial outer membrane	-	GO:0006886//intracellular protein transport
PDE_00789	29.2276	19.3347	64.6137	13.4804	7.58776	-1.94559	0.876066	4.33628e-13	2.6124e-11	hypothetical protein	K01932|1|0.0|674|afm:AFUA_6G12080|[EC:6.3.2.-] (A)	-	GO:0003824//catalytic activity	GO:0008152//metabolic process
PDE_00790	76.9297	43.6914	157.45	53.9538	14.759	-2.38194	0.935633	4.2983e-24	7.40765e-22	hypothetical protein	-	-	-	-
PDE_00792	62.7055	30.7868	132.536	25.0142	9.23416	-2.76354	0.932473	3.29191e-24	5.7764e-22	hypothetical protein	-	-	-	-
PDE_00794	80.929	41.8272	373.534	63.2889	11.4527	-2.82097	0.941417	6.77484e-35	2.61536e-32	hypothetical protein	-	-	-	-
PDE_00795	19.7546	10.3878	62.779	10.8646	3.34035	-2.56412	0.854139	4.72766e-21	6.33703e-19	hypothetical protein	-	-	-	-
PDE_00796	24.0306	12.1325	97.704	19.6049	2.95677	-3.02278	0.880642	3.31563e-18	3.44077e-16	hypothetical protein	-	-	-	-
PDE_00797	115.49	71.1906	211.604	70.7701	28.4638	-2.02057	0.940934	8.32908e-21	1.08627e-18	hypothetical protein	-	-	GO:0050364;GO:0050364	GO:0009820//alkaloid metabolic process;GO:0009820//alkaloid metabolic process
PDE_00798	96.6865	52.0881	155.45	55.7066	19.255	-2.32808	0.941158	2.82368e-18	2.9621e-16	hypothetical protein	-	-	-	-
PDE_00799	56.2838	39.294	132.638	42.8457	20.562	-1.45274	0.899461	4.96647e-08	1.18133e-06	hypothetical protein	-	-	-	-
PDE_00800	18.8735	16.4026	48.2646	15.2872	6.81031	-1.47057	0.803861	0.000109965	0.00121011	hypothetical protein	-	-	GO:0016491//oxidoreductase activity;GO:0016491//oxidoreductase activity;GO:0016491//oxidoreductase activity;GO:0016491//oxidoreductase activity	GO:0008152//metabolic process;GO:0008152//metabolic process;GO:0008152//metabolic process;GO:0008152//metabolic process
PDE_00803	22.1567	14.2967	57.808	10.3105	3.28311	-2.75461	0.869661	1.55128e-11	7.52333e-10	hypothetical protein	-	-	-	-
PDE_00804	24.533	13.0327	61.9882	11.5816	2.3837	-3.36345	0.88627	1.35799e-28	3.36051e-26	hypothetical protein	-	-	-	-
PDE_00805	40.13	20.6855	101.4	19.4741	4.10915	-3.28777	0.918799	3.13234e-30	8.6372e-28	hypothetical protein	-	-	-	-
PDE_00806	51.3934	30.7441	170.807	28.0148	6.11527	-3.0711	0.92852	9.22655e-32	2.78267e-29	hypothetical protein	-	-	-	-
PDE_00807	25.9765	10.924	64.7445	12.1404	2.72727	-3.25168	0.889792	2.07484e-31	6.06796e-29	hypothetical protein	-	-	GO:0050364;GO:0050364	GO:0009820//alkaloid metabolic process;GO:0009820//alkaloid metabolic process
PDE_00808	26.2006	13.9542	66.6801	10.7489	4.46901	-2.55158	0.88128	3.3071e-23	5.14787e-21	hypothetical protein	-	-	GO:0005506//iron ion binding;GO:0016705//oxidoreductase activity, acting on paired donors, with incorporation or reduction of molecular oxygen;GO:0020037//heme binding;GO:0005506//iron ion binding;GO:0016705//oxidoreductase activity, acting on paired donors, with incorporation or reduction of molecular oxygen;GO:0020037//heme binding;GO:0005506//iron ion binding;GO:0016705//oxidoreductase activit…	GO:0055114//oxidation-reduction process;GO:0055114//oxidation-reduction process;GO:0055114//oxidation-reduction process;GO:0055114//oxidation-reduction process;GO:0055114//oxidation-reduction process;GO:0055114//oxidation-reduction process;GO:0055114//oxidation-reduction process;GO:0055114//oxidation-reduction process;GO:0055114//oxidation-reduction process;GO:0055114//oxidation-reduction process
PDE_00811	37.5275	21.9563	64.5524	16.5387	10.6849	-1.81237	0.890811	1.60845e-13	1.06323e-11	hypothetical protein	K18389|1|4e-134|401|afv:AFLA_045500|cytochrome P450 monooxygenase [EC:1.14.13.-] (A)	-	GO:0005506//iron ion binding;GO:0016705//oxidoreductase activity, acting on paired donors, with incorporation or reduction of molecular oxygen;GO:0020037//heme binding;GO:0005506//iron ion binding;GO:0016705//oxidoreductase activity, acting on paired donors, with incorporation or reduction of molecular oxygen;GO:0020037//heme binding;GO:0005506//iron ion binding;GO:0016705//oxidoreductase activit…	GO:0055114//oxidation-reduction process;GO:0055114//oxidation-reduction process;GO:0055114//oxidation-reduction process;GO:0055114//oxidation-reduction process;GO:0055114//oxidation-reduction process;GO:0055114//oxidation-reduction process;GO:0055114//oxidation-reduction process
PDE_00817	301.989	184.694	583.284	307.887	103.084	-1.55067	0.943731	4.6244e-10	1.6653e-08	hypothetical protein	K02979|1|2e-41|133|pcs:Pc21g08830|small subunit ribosomal protein S28e (A)	GO:0005622//intracellular;GO:0005840//ribosome;GO:0005622//intracellular;GO:0005840//ribosome	GO:0003735//structural constituent of ribosome;GO:0003735//structural constituent of ribosome	GO:0006412//translation;GO:0006412//translation
PDE_00836	26.5395	2.5788	2.47002	1.10826	3.14174	-3.07851	0.889516	5.30072e-05	0.000635494	hypothetical protein	-	-	GO:0008270//zinc ion binding	-
PDE_00857	78.6694	48.1669	81.8466	41.4613	35.9407	-1.13018	0.895162	2.78705e-05	0.000364469	hypothetical protein	-	-	-	GO:0008610//lipid biosynthetic process
PDE_00860	39.9353	34.1472	40.5311	66.972	17.5954	-1.18247	0.857782	0.0221001	0.0909545	hypothetical protein	K17805|1|5e-80|237|afm:AFUA_7G04150|mitochondrial import inner membrane translocase subunit TIM16 (A)	-	-	-
PDE_00873	328.557	513.749	228.856	262.279	127.627	-1.36421	0.937895	0.334739	0.59095	hypothetical protein	K01626|1|0.0|676|pcs:Pc21g04710|3-deoxy-7-phosphoheptulonate synthase [EC:2.5.1.54] (A)	-	GO:0003849//3-deoxy-7-phosphoheptulonate synthase activity	GO:0009073//aromatic amino acid family biosynthetic process;GO:0009058//biosynthetic process
PDE_00913	49.5184	40.7303	21.2822	24.3893	18.6362	-1.40985	0.890138	0.0329185	0.123041	hypothetical protein	-	GO:0016021//integral component of membrane	-	GO:0055085//transmembrane transport
PDE_00917	41.423	27.8789	69.8149	24.0075	19.3758	-1.09618	0.852636	6.62448e-05	0.000775885	putative Dol-PP-alpha-oligosaccharide: protein beta-oligosaccharyltransferase	K07151|1|0.0|1387|pcs:Pc21g05240|dolichyl-diphosphooligosaccharide--protein glycosyltransferase [EC:2.4.99.18] (A)	GO:0016020//membrane	GO:0004576//oligosaccharyl transferase activity	GO:0006486//protein glycosylation
PDE_00924	65.6485	72.9886	158.856	61.3177	32.2826	-1.02401	0.87339	0.000473031	0.00415398	hypothetical protein	-	-	-	-
PDE_00961	391.392	197.673	73.6998	148.476	180.426	-1.11721	0.926845	1.34026e-05	0.000193346	hypothetical protein	-	-	-	-
PDE_00963	27.7004	11.4026	15.5621	13.7187	4.98304	-2.47481	0.884406	3.66346e-11	1.63686e-09	hypothetical protein	K01288|5|0.0|825|afm:AFUA_8G04120|carboxypeptidase D [EC:3.4.16.6] (A)	-	GO:0004185//serine-type carboxypeptidase activity;GO:0004185//serine-type carboxypeptidase activity;GO:0004185//serine-type carboxypeptidase activity;GO:0004185//serine-type carboxypeptidase activity;GO:0004185//serine-type carboxypeptidase activity;GO:0004185//serine-type carboxypeptidase activity	GO:0006508//proteolysis;GO:0006508//proteolysis;GO:0006508//proteolysis;GO:0006508//proteolysis;GO:0006508//proteolysis;GO:0006508//proteolysis
PDE_00965	30.291	33.8943	3.94596	8.03075	15.0209	-1.01192	0.809507	0.0298006	0.114084	putative N-acetyl-glucosamine-6-phosphate deacetylase	K01443|1|0.0|729|pcs:Pc22g10010|N-acetylglucosamine-6-phosphate deacetylase [EC:3.5.1.25] (A)	-	GO:0008448//N-acetylglucosamine-6-phosphate deacetylase activity	GO:0006044//N-acetylglucosamine metabolic process
PDE_00968	61.6822	59.9056	28.8727	52.5535	28.4889	-1.11445	0.880987	0.000146372	0.00153048	hypothetical protein	K00130|1|0.0|894|pcs:Pc22g10030|betaine-aldehyde dehydrogenase [EC:1.2.1.8] (A)	-	GO:0016491//oxidoreductase activity;GO:0016491//oxidoreductase activity;GO:0016491//oxidoreductase activity	GO:0008152//metabolic process;GO:0055114//oxidation-reduction process;GO:0008152//metabolic process;GO:0055114//oxidation-reduction process;GO:0008152//metabolic process;GO:0055114//oxidation-reduction process
PDE_00987	174.142	109.969	397.634	470.245	83.3357	-1.06325	0.911323	7.24723e-05	0.000838645	hypothetical protein	K03283|1|0.0|1177|afv:AFLA_012200|heat shock 70kDa protein 1/8 (A)	-	-	-
PDE_01007	187.138	104.57	330.451	194.252	73.7823	-1.34276	0.930263	1.17009e-07	2.59003e-06	hypothetical protein	K02903|1|4e-81|239|pcs:Pc12g04760|large subunit ribosomal protein L28e (A)	-	-	-
PDE_01018	129.917	124.08	103.806	126.095	59.8719	-1.11764	0.910719	0.000692119	0.00566072	hypothetical protein	K03783|1|5e-174|487|pcs:Pc12g04650|purine-nucleoside phosphorylase [EC:2.4.2.1] (A)	-	GO:0004731//purine-nucleoside phosphorylase activity;GO:0004731//purine-nucleoside phosphorylase activity;GO:0016763//transferase activity, transferring pentosyl groups;GO:0003824//catalytic activity	GO:0006139//nucleobase-containing compound metabolic process;GO:0006139//nucleobase-containing compound metabolic process;GO:0009116//nucleoside metabolic process
PDE_01023	55.6965	43.4807	55.3307	37.2793	27.3854	-1.02418	0.863238	0.000940085	0.00729969	hypothetical protein	K00227|1|0.0|630|pcs:Pc12g04600|lathosterol oxidase [EC:1.14.21.6] (A)	-	GO:0005506//iron ion binding;GO:0016491//oxidoreductase activity	GO:0006633//fatty acid biosynthetic process;GO:0055114//oxidation-reduction process
PDE_01065	81.3708	41.9704	369.326	102.982	12.2152	-2.73583	0.940744	4.26761e-32	1.37289e-29	hypothetical protein	-	-	GO:0008168//methyltransferase activity	GO:0008152//metabolic process
PDE_01066	128.578	74.8873	304.163	115.368	25.1122	-2.35618	0.947201	2.70703e-28	6.37209e-26	hypothetical protein	K14133|1|0.0|613|pcs:Pc21g15430|cyclic dipeptide N-dimethylallyltransferase [EC:2.5.1.-] (A)	-	GO:0050364;GO:0050364	GO:0009820//alkaloid metabolic process;GO:0009820//alkaloid metabolic process
PDE_01068	37.3001	20.6407	177.205	64.1583	5.95998	-2.6458	0.907732	7.58514e-27	1.66373e-24	hypothetical protein	-	-	GO:0016491//oxidoreductase activity;GO:0016491//oxidoreductase activity;GO:0016491//oxidoreductase activity;GO:0016491//oxidoreductase activity	GO:0008152//metabolic process;GO:0008152//metabolic process;GO:0008152//metabolic process;GO:0008152//metabolic process
PDE_01069	30.7237	13.8033	180.043	45.9408	5.83621	-2.39625	0.891485	2.73451e-12	1.48262e-10	hypothetical protein	-	-	GO:0008171//O-methyltransferase activity	-
PDE_01073	40.8026	24.3132	138.306	41.686	11.2578	-1.85774	0.897355	5.14608e-07	1.00945e-05	hypothetical protein	-	-	-	-
PDE_01100	206.23	142.105	199.541	99.4769	94.9093	-1.11963	0.919697	0.000277751	0.00262545	hypothetical protein	-	-	-	-
PDE_01105	28.3318	20.6028	20.6363	25.1421	12.0314	-1.23561	0.831261	0.00167193	0.0118211	hypothetical protein	K11495|1|2e-87|256|pcs:Pc20g11740|histone H3-like centromeric protein A (A)	GO:0000786//nucleosome;GO:0000786//nucleosome;GO:0000786//nucleosome;GO:0000786//nucleosome;GO:0000786//nucleosome;GO:0000786//nucleosome	GO:0003677//DNA binding;GO:0003677//DNA binding;GO:0003677//DNA binding;GO:0003677//DNA binding;GO:0003677//DNA binding;GO:0003677//DNA binding;GO:0003677//DNA binding	GO:0006334//nucleosome assembly;GO:0006334//nucleosome assembly;GO:0006334//nucleosome assembly;GO:0006334//nucleosome assembly;GO:0006334//nucleosome assembly;GO:0006334//nucleosome assembly
PDE_01118	384.394	274.457	310.783	147.327	183.685	-1.06535	0.923081	0.000744509	0.00599771	hypothetical protein	-	-	-	-
PDE_01119	25.5471	14.5413	31.3861	11.3044	10.9673	-1.21995	0.818312	0.000429689	0.00381854	hypothetical protein	K17623|2|7e-68|225|ure:UREG_02228|pseudouridine-5'-monophosphatase [EC:3.1.3.-] (A)	-	-	-
PDE_01156	35.5939	24.4727	36.2148	39.853	16.1421	-1.1408	0.844401	0.0001962	0.00196628	hypothetical protein	K02996|2|3e-153|435|act:ACLA_096200|small subunit ribosomal protein S9 (A)	GO:0005840//ribosome;GO:0005840//ribosome	GO:0003735//structural constituent of ribosome;GO:0003735//structural constituent of ribosome	GO:0006412//translation;GO:0006412//translation
PDE_01180	140.094	38.6159	26.4967	18.2907	56.1478	-1.31909	0.924169	1.57297e-07	3.37349e-06	hypothetical protein	-	-	-	-
PDE_01187	958.517	1670.1	331.308	113.115	111.207	-3.10756	0.968058	0.146362	0.348567	hypothetical protein	-	GO:0016021//integral component of membrane	-	GO:0055085//transmembrane transport
PDE_01188	608.633	1167.52	162.955	78.6293	27.5924	-4.46323	0.973618	0.0937408	0.258954	hypothetical protein	-	-	GO:0016491//oxidoreductase activity	GO:0055114//oxidation-reduction process
PDE_01189	362.38	747.281	101.535	47.9858	13.0131	-4.79947	0.973756	0.0660833	0.202467	hypothetical protein	K01101|1|0.0|580|nfi:NFIA_043770|4-nitrophenyl phosphatase [EC:3.1.3.41] (A)	-	GO:0016791//phosphatase activity	GO:0008152//metabolic process
PDE_01191	672.631	1348.6	373.933	103.387	85.2008	-2.98088	0.966349	0.181684	0.401242	hypothetical protein	-	-	-	-
PDE_01192	132.141	230.756	60.4196	86.8665	39.3389	-1.74805	0.938258	0.306926	0.558368	hypothetical protein	-	-	-	-
PDE_01193	236.413	589.457	54.9493	14.7161	6.74047	-5.13231	0.972996	0.0884107	0.248183	hypothetical protein	-	-	-	-
PDE_01194	3263.29	7164.04	704.307	227.852	131.26	-4.63583	0.97828	0.117166	0.301458	hypothetical protein	K00799|1|2e-162|451|nfi:NFIA_043710|glutathione S-transferase [EC:2.5.1.18] (A)	-	GO:0005515//protein binding;GO:0005515//protein binding	-
PDE_01195	1348.55	2836.44	270.572	135.657	44.2048	-4.93106	0.979885	0.0946884	0.260674	hypothetical protein	-	-	-	-
PDE_01201	291.081	118.652	1329.54	355.304	1.62425	-7.4855	0.991264	2.25092e-84	4.34473e-81	alpha-amylase Amy13A	K01176|1|0.0|965|pcs:Pc16g00630|alpha-amylase [EC:3.2.1.1] (A)	-	GO:0003824//catalytic activity;GO:0043169//cation binding;GO:2001070//starch binding;GO:0003824//catalytic activity;GO:0043169//cation binding;GO:2001070//starch binding;GO:0004556//alpha-amylase activity;GO:0005509//calcium ion binding;GO:2001070//starch binding	GO:0005975//carbohydrate metabolic process;GO:0005975//carbohydrate metabolic process;GO:0016052//carbohydrate catabolic process
PDE_01206	40.2644	37.5013	48.7797	102.782	19.8033	-1.02376	0.838945	0.0188561	0.0808799	hypothetical protein	-	-	-	-
PDE_01232	31.9611	22.0752	4.65206	26.9003	14.8104	-1.1097	0.829794	0.0673664	0.205031	hypothetical protein	-	-	-	-
PDE_01238	34.3633	21.2359	18.2662	12.881	14.9122	-1.20437	0.847647	8.21514e-05	0.000938276	hypothetical protein	K15385|1|7e-127|372|aor:AOR_1_492164|aspyridone synthetase trans-acting enoyl reductase (A)	-	GO:0016491//oxidoreductase activity;GO:0016747//transferase activity, transferring acyl groups other than amino-acyl groups;GO:0016491//oxidoreductase activity	GO:0055114//oxidation-reduction process
PDE_01265	275.408	704.563	116.654	165.627	132.916	-1.05105	0.917521	0.377854	0.630585	hypothetical protein	-	GO:0016021//integral component of membrane	GO:0015299//solute:proton antiporter activity	GO:0006812//cation transport;GO:0055085//transmembrane transport
PDE_01331	1455.14	1064.49	712.09	847.471	532.321	-1.45079	0.948876	1.30491e-10	5.18261e-09	hypothetical protein	-	-	GO:0005515//protein binding	-
PDE_01353	380.302	124.997	204.649	109.936	58.2237	-2.70747	0.961376	1.78716e-42	1.07799e-39	hypothetical protein	K01279|1|0.0|894|pcs:Pc12g14680|tripeptidyl-peptidase I [EC:3.4.14.9] (A)	-	GO:0008236//serine-type peptidase activity;GO:0008236//serine-type peptidase activity;GO:0004252//serine-type endopeptidase activity	GO:0006508//proteolysis
PDE_01354	1102.01	171.274	4893.05	1130.97	17.3218	-5.9914	0.989606	1.66591e-101	4.01943e-98	starch binding domain- and chitin binding domain-containing protein	-	GO:0019028//viral capsid	GO:2001070//starch binding;GO:2001070//starch binding;GO:2001070//starch binding	-
PDE_01358	362.545	253.551	990.996	545.078	148.699	-1.28577	0.935892	1.57155e-07	3.37349e-06	hypothetical protein	-	-	-	-
PDE_01365	82.0361	67.376	122.175	128.344	35.8495	-1.19431	0.901499	6.22897e-06	9.58784e-05	hypothetical protein	K09522|1|0.0|682|act:ACLA_054750|DnaJ homolog subfamily C member 2 (A)	-	-	-
PDE_01368	107.459	60.0254	120.985	62.2599	36.5465	-1.55598	0.92795	5.09616e-11	2.22548e-09	hypothetical protein	K00559|1|0.0|712|pcs:Pc12g14840|sterol 24-C-methyltransferase [EC:2.1.1.41] (A)	-	GO:0008168//methyltransferase activity;GO:0008168//methyltransferase activity;GO:0003838//sterol 24-C-methyltransferase activity	GO:0006694//steroid biosynthetic process;GO:0008152//metabolic process
PDE_01370	17.8211	50.1228	19.7732	5.45964	4.48428	-1.99064	0.826289	0.237465	0.476262	hypothetical protein	K06001|1|0.0|635|aor:AOR_1_1380024|tryptophan synthase beta chain [EC:4.2.1.20] (A)	-	GO:0004834//tryptophan synthase activity;GO:0004834//tryptophan synthase activity	GO:0000162//tryptophan biosynthetic process;GO:0006568//tryptophan metabolic process
PDE_01375	70.9192	68.9024	24.3386	37.6218	34.0314	-1.05931	0.883093	0.000553737	0.0047335	hypothetical protein	K01951|1|1e-107|315|afm:AFUA_4G03700|GMP synthase (glutamine-hydrolysing) [EC:6.3.5.2] (A)	-	-	-
PDE_01380	297.439	208.727	91.0346	214.49	133.928	-1.15113	0.925654	1.1105e-05	0.000163375	hypothetical protein	-	-	GO:0008080//N-acetyltransferase activity;GO:0008080//N-acetyltransferase activity	-
PDE_01384	65.1332	84.8311	7.17101	169.767	7.6134	-3.09678	0.936755	1.05287e-45	6.77415e-43	hypothetical protein	K00281|1|0.0|1888|pcs:Pc14g00390|glycine dehydrogenase [EC:1.4.4.2] (A)	-	GO:0004375//glycine dehydrogenase (decarboxylating) activity;GO:0004375//glycine dehydrogenase (decarboxylating) activity;GO:0004375//glycine dehydrogenase (decarboxylating) activity;GO:0004375//glycine dehydrogenase (decarboxylating) activity	GO:0006546//glycine catabolic process;GO:0055114//oxidation-reduction process;GO:0006546//glycine catabolic process;GO:0055114//oxidation-reduction process;GO:0006544//glycine metabolic process;GO:0055114//oxidation-reduction process;GO:0006544//glycine metabolic process;GO:0055114//oxidation-reduction process
PDE_01390	28.821	21.2048	7.55584	6.81275	12.0044	-1.26356	0.835543	0.000191707	0.00192927	hypothetical protein	-	-	GO:0016491//oxidoreductase activity	GO:0008152//metabolic process
PDE_01405	105.978	84.8032	144.77	77.8243	37.3485	-1.50464	0.925049	2.56536e-09	7.83677e-08	hypothetical protein	-	-	GO:0008080//N-acetyltransferase activity;GO:0008080//N-acetyltransferase activity	-
PDE_01489	1710.31	1346.63	1474.4	1990.74	829.888	-1.04327	0.927984	9.41979e-05	0.00105956	hypothetical protein	K11252|1|1e-91|265|ang:ANI_1_1488094|histone H2B (A)	GO:0000786//nucleosome;GO:0005634//nucleus;GO:0000786//nucleosome;GO:0005634//nucleus;GO:0000786//nucleosome;GO:0005634//nucleus;GO:0000786//nucleosome;GO:0005634//nucleus;GO:0000786//nucleosome;GO:0005634//nucleus;GO:0000786//nucleosome;GO:0005634//nucleus;GO:0000786//nucleosome;GO:0005634//nucleus	GO:0003677//DNA binding;GO:0003677//DNA binding;GO:0003677//DNA binding;GO:0003677//DNA binding;GO:0003677//DNA binding;GO:0003677//DNA binding;GO:0003677//DNA binding;GO:0003677//DNA binding	GO:0006334//nucleosome assembly;GO:0006334//nucleosome assembly;GO:0006334//nucleosome assembly;GO:0006334//nucleosome assembly;GO:0006334//nucleosome assembly;GO:0006334//nucleosome assembly;GO:0006334//nucleosome assembly
PDE_01490	1222.47	850.76	1258.47	1538.59	482.801	-1.3403	0.944456	1.35215e-08	3.59492e-07	hypothetical protein	K11251|1|6e-88|255|ang:ANI_1_1484094|histone H2A (A)	GO:0000786//nucleosome;GO:0005634//nucleus;GO:0000786//nucleosome;GO:0005634//nucleus;GO:0000786//nucleosome;GO:0005634//nucleus;GO:0000786//nucleosome;GO:0005634//nucleus;GO:0000786//nucleosome;GO:0005634//nucleus;GO:0000786//nucleosome;GO:0005634//nucleus;GO:0000786//nucleosome;GO:0005634//nucleus	GO:0003677//DNA binding;GO:0003677//DNA binding;GO:0003677//DNA binding;GO:0003677//DNA binding;GO:0003677//DNA binding;GO:0003677//DNA binding;GO:0003677//DNA binding;GO:0003677//DNA binding	GO:0006334//nucleosome assembly;GO:0006334//nucleosome assembly;GO:0006334//nucleosome assembly;GO:0006334//nucleosome assembly;GO:0006334//nucleosome assembly;GO:0006334//nucleosome assembly;GO:0006334//nucleosome assembly
PDE_01495	38.6073	28.7808	79.707	34.1594	16.6572	-1.21273	0.858749	1.1735e-05	0.00017212	hypothetical protein	K09523|1|0.0|779|pcs:Pc20g08540|DnaJ homolog subfamily C member 3 (A)	-	GO:0005515//protein binding;GO:0005515//protein binding;GO:0005515//protein binding;GO:0005515//protein binding;GO:0005515//protein binding;GO:0005515//protein binding;GO:0005515//protein binding;GO:0005515//protein binding;GO:0005515//protein binding;GO:0005515//protein binding;GO:0005515//protein binding;GO:0005515//protein binding;GO:0005515//protein binding	-
PDE_01517	336.892	192.079	656.425	362.313	126.323	-1.41517	0.940312	2.56597e-09	7.83677e-08	hypothetical protein	K02900|1|1e-100|288|ang:ANI_1_1440094|large subunit ribosomal protein L27Ae (A)	GO:0005622//intracellular;GO:0005840//ribosome	GO:0003735//structural constituent of ribosome	GO:0006412//translation
PDE_01556	60.4524	28.5262	217.645	28.93	15.0848	-2.0027	0.921665	1.71407e-19	1.99308e-17	hypothetical protein	-	GO:0005737//cytoplasm	GO:0016841//ammonia-lyase activity;GO:0016841//ammonia-lyase activity;GO:0016841//ammonia-lyase activity	GO:0009058//biosynthetic process;GO:0006559//L-phenylalanine catabolic process
PDE_01576	109.031	72.5313	233.138	124.082	50.6791	-1.10528	0.903968	0.000233762	0.00226965	hypothetical protein	K00958|1|0.0|1076|pcs:Pc20g07710|sulfate adenylyltransferase [EC:2.7.7.4] (A)	-	GO:0004781//sulfate adenylyltransferase (ATP) activity;GO:0004020//adenylylsulfate kinase activity;GO:0005524//ATP binding;GO:0004781//sulfate adenylyltransferase (ATP) activity;GO:0004020//adenylylsulfate kinase activity;GO:0005524//ATP binding	GO:0000103//sulfate assimilation;GO:0000103//sulfate assimilation;GO:0000103//sulfate assimilation;GO:0000096//sulfur amino acid metabolic process
PDE_01627	191.045	136.059	116.515	260.224	87.9453	-1.11924	0.918402	8.20997e-05	0.000938276	hypothetical protein	-	-	-	-
PDE_01650	26.4605	17.6618	68.8603	41.9037	9.52602	-1.47389	0.843278	1.49918e-07	3.24409e-06	hypothetical protein	K01755|1|0.0|886|act:ACLA_035720|argininosuccinate lyase [EC:4.3.2.1] (A)	-	GO:0003824//catalytic activity;GO:0004056//argininosuccinate lyase activity;GO:0004056//argininosuccinate lyase activity	GO:0042450//arginine biosynthetic process via ornithine;GO:0042450//arginine biosynthetic process via ornithine
PDE_01658	29.0128	21.5283	29.1926	27.2465	14.3611	-1.01452	0.804914	0.00129744	0.00964686	putative Dol-P-Glc: alpha-1,3-glucosyltransferase	K03848|1|0.0|915|nfi:NFIA_069450|alpha-1,3-glucosyltransferase [EC:2.4.1.267] (A)	GO:0005789//endoplasmic reticulum membrane;GO:0005789//endoplasmic reticulum membrane	GO:0016758//transferase activity, transferring hexosyl groups;GO:0016758//transferase activity, transferring hexosyl groups	-
PDE_01674	874.916	916.717	1188.69	2435.07	432.576	-1.01619	0.921682	0.0323958	0.121466	hypothetical protein	K01535|1|0.0|1776|pcs:Pc15g01800|H+-transporting ATPase [EC:3.6.3.6] (A)	GO:0016021//integral component of membrane;GO:0016021//integral component of membrane;GO:0016021//integral component of membrane;GO:0016021//integral component of membrane;GO:0016021//integral component of membrane;GO:0016021//integral component of membrane;GO:0016021//integral component of membrane;GO:0016021//integral component of membrane;GO:0016021//integral component of membrane;GO:0016021//…	GO:0000166//nucleotide binding;GO:0046872//metal ion binding;GO:0016887//ATPase activity;GO:0019829//cation-transporting ATPase activity;GO:0019829//cation-transporting ATPase activity;GO:0019829//cation-transporting ATPase activity;GO:0019829//cation-transporting ATPase activity;GO:0019829//cation-transporting ATPase activity;GO:0019829//cation-transporting ATPase activity;GO:0019829//cation-tra…	GO:0006200//ATP catabolic process;GO:0006754//ATP biosynthetic process;GO:0006812//cation transport;GO:0006812//cation transport;GO:0006812//cation transport;GO:0006812//cation transport;GO:0006812//cation transport;GO:0006812//cation transport;GO:0006812//cation transport;GO:0006812//cation transport;GO:0006812//cation transport;GO:0006812//cation transport;GO:0006812//cation transport;GO:000681…
PDE_01695	357.688	211.861	846.666	448.711	136.863	-1.38597	0.940226	1.17074e-08	3.13857e-07	hypothetical protein	K02969|1|7e-79|231|pcs:Pc20g04380|small subunit ribosomal protein S20e (A)	GO:0005622//intracellular;GO:0005840//ribosome;GO:0015935//small ribosomal subunit;GO:0005840//ribosome;GO:0005840//ribosome;GO:0005840//ribosome;GO:0005840//ribosome	GO:0003723//RNA binding;GO:0003735//structural constituent of ribosome;GO:0003735//structural constituent of ribosome;GO:0003735//structural constituent of ribosome;GO:0003735//structural constituent of ribosome;GO:0003735//structural constituent of ribosome;GO:0003735//structural constituent of ribosome	GO:0006412//translation;GO:0006412//translation;GO:0006412//translation;GO:0006412//translation;GO:0006412//translation;GO:0006412//translation
PDE_01705	26.1646	20.1227	15.5886	14.6107	8.58958	-1.60696	0.851083	1.77458e-05	0.000246779	hypothetical protein	K00567|1|2e-59|185|afm:AFUA_2G02090|methylated-DNA-[protein]-cysteine S-methyltransferase [EC:2.1.1.63] (A)	-	GO:0003908//methylated-DNA-[protein]-cysteine S-methyltransferase activity;GO:0003824//catalytic activity;GO:0003824//catalytic activity	GO:0006281//DNA repair;GO:0006281//DNA repair;GO:0006281//DNA repair
PDE_01716	19.082	20.0366	21.6605	14.0548	4.10373	-2.2172	0.841863	6.57583e-10	2.26655e-08	hypothetical protein	K01895|1|0.0|775|pfj:MYCFIDRAFT_55238|acetyl-CoA synthetase [EC:6.2.1.1] (A)	-	GO:0003824//catalytic activity;GO:0016747//transferase activity, transferring acyl groups other than amino-acyl groups;GO:0003987//acetate-CoA ligase activity;GO:0016208//AMP binding	GO:0008152//metabolic process;GO:0019427//acetyl-CoA biosynthetic process from acetate
PDE_01717	61.9165	57.9996	56.3185	52.6015	13.5235	-2.19485	0.925999	1.25827e-09	4.10257e-08	hypothetical protein	-	-	GO:0045482//trichodiene synthase activity	GO:0016106//sesquiterpenoid biosynthetic process
PDE_01718	25.8396	30.4	28.8959	9.86106	5.07132	-2.34915	0.87598	1.36666e-10	5.38352e-09	hypothetical protein	K00787|1|2e-105|316|ang:ANI_1_1456024|farnesyl diphosphate synthase [EC:2.5.1.1 2.5.1.10] (A)	-	-	GO:0008299//isoprenoid biosynthetic process;GO:0008299//isoprenoid biosynthetic process;GO:0008299//isoprenoid biosynthetic process
PDE_01742	97.1083	53.5676	74.1987	66.9198	46.6586	-1.05745	0.895956	0.0369587	0.132913	hypothetical protein	-	-	-	-
PDE_01752	70.6527	33.4223	8.26393	27.6274	18.9854	-1.89586	0.924894	0.000464256	0.00408436	hypothetical protein	K06911|1|0.0|511|pcs:Pc13g13510|(A)	-	-	-
PDE_01762	29.0323	16.0006	25.8121	23.5092	11.0385	-1.39511	0.848027	7.49373e-08	1.71379e-06	hypothetical protein	-	-	-	-
PDE_01763	56.1542	34.5299	106.652	34.4421	18.9129	-1.57002	0.905245	1.05251e-10	4.30416e-09	hypothetical protein	-	-	-	-
PDE_01793	194.743	238.525	67.7473	39.9632	51.9947	-1.90514	0.947357	0.121862	0.30897	hypothetical protein	-	GO:0016021//integral component of membrane	-	GO:0055085//transmembrane transport
PDE_01806	498.396	273.345	906.943	523.139	156.82	-1.66818	0.951483	3.35991e-14	2.40196e-12	hypothetical protein	K02997|1|2e-130|367|afv:AFLA_101160|small subunit ribosomal protein S9e (A)	GO:0005622//intracellular;GO:0005622//intracellular;GO:0015935//small ribosomal subunit	GO:0019843//rRNA binding;GO:0003723//RNA binding;GO:0019843//rRNA binding;GO:0003723//RNA binding;GO:0003735//structural constituent of ribosome;GO:0003723//RNA binding	GO:0006412//translation
PDE_01807	502.056	284.448	1015.91	597.011	191.57	-1.38998	0.942833	3.3859e-09	1.01576e-07	hypothetical protein	K02889|1|3e-105|301|pcs:Pc20g02750|large subunit ribosomal protein L21e (A)	GO:0005622//intracellular;GO:0005840//ribosome;GO:0005622//intracellular;GO:0005840//ribosome	GO:0003735//structural constituent of ribosome;GO:0003735//structural constituent of ribosome	GO:0006412//translation;GO:0006412//translation
PDE_01810	231.763	172.864	386.168	172.223	107.946	-1.10235	0.919265	0.000217393	0.00213217	hypothetical protein	K07342|1|2e-43|138|pcs:Pc20g02810|protein transport protein SEC61 subunit gamma and related proteins (A)	GO:0016020//membrane;GO:0016020//membrane	GO:0015450//P-P-bond-hydrolysis-driven protein transmembrane transporter activity	GO:0006605//protein targeting;GO:0006886//intracellular protein transport;GO:0015031//protein transport
PDE_01817	349.224	185.11	736.919	395.592	131.396	-1.41023	0.940329	1.06042e-09	3.52899e-08	hypothetical protein	K02987|1|0.0|502|afm:AFUA_3G06840|small subunit ribosomal protein S4e (A)	GO:0005622//intracellular;GO:0005840//ribosome	GO:0003723//RNA binding;GO:0003723//RNA binding;GO:0003723//RNA binding;GO:0003735//structural constituent of ribosome	GO:0006412//translation
PDE_01824	291.562	170.303	552.979	351.663	124.132	-1.23193	0.930384	3.14105e-06	5.1908e-05	hypothetical protein	K02922|1|1e-57|176|pcs:Pc20g02980|large subunit ribosomal protein L37e (A)	GO:0005622//intracellular;GO:0005840//ribosome;GO:0005622//intracellular;GO:0005840//ribosome;GO:0005622//intracellular;GO:0005840//ribosome	GO:0003735//structural constituent of ribosome;GO:0003735//structural constituent of ribosome;GO:0003735//structural constituent of ribosome	GO:0006412//translation;GO:0006412//translation;GO:0006412//translation
PDE_01832	474.023	303.569	862.17	547.841	231.132	-1.03624	0.921803	0.000238525	0.00230431	hypothetical protein	K02978|1|2e-54|167|pcs:Pc20g03120|small subunit ribosomal protein S27e (A)	GO:0005622//intracellular;GO:0005840//ribosome;GO:0005622//intracellular;GO:0005840//ribosome	GO:0003735//structural constituent of ribosome;GO:0003735//structural constituent of ribosome	GO:0006412//translation;GO:0006412//translation
PDE_01833	46.4692	41.6116	37.2079	22.1764	10.2096	-2.18635	0.913395	7.04967e-09	1.9607e-07	hypothetical protein	-	-	-	-
PDE_01834	60.4025	47.3488	48.4665	36.598	21.6836	-1.478	0.904296	4.19509e-09	1.22317e-07	hypothetical protein	K00993|1|0.0|679|pcs:Pc20g03110|ethanolaminephosphotransferase [EC:2.7.8.1] (A)	GO:0016020//membrane;GO:0016020//membrane	GO:0016780//phosphotransferase activity, for other substituted phosphate groups;GO:0016780//phosphotransferase activity, for other substituted phosphate groups	GO:0008654//phospholipid biosynthetic process;GO:0008654//phospholipid biosynthetic process
PDE_01855	34.3892	31.5323	28.1534	25.1686	13.3376	-1.36646	0.860751	5.03653e-06	7.92945e-05	hypothetical protein	-	-	-	-
PDE_01906	54.2726	52.8594	43.305	33.9337	21.4945	-1.33626	0.891226	2.955e-08	7.46564e-07	hypothetical protein	-	-	GO:0005515//protein binding;GO:0005515//protein binding;GO:0005515//protein binding;GO:0005515//protein binding;GO:0005515//protein binding;GO:0005515//protein binding;GO:0005515//protein binding;GO:0005515//protein binding;GO:0005515//protein binding;GO:0005515//protein binding	-
PDE_01913	46.3539	20.8783	7.43744	16.2071	12.7475	-1.86247	0.905383	0.00136608	0.0100565	hypothetical protein	-	GO:0016021//integral component of membrane	-	GO:0055085//transmembrane transport
PDE_01916	362.098	152.625	186.394	191.058	75.6535	-2.2589	0.957716	4.21384e-12	2.21021e-10	hypothetical protein	-	-	-	GO:0055085//transmembrane transport;GO:0055085//transmembrane transport
PDE_01917	28.2457	23.5732	8.00723	7.17329	11.577	-1.28676	0.835992	1.19012e-05	0.000174027	hypothetical protein	-	-	GO:0003824//catalytic activity;GO:0030170//pyridoxal phosphate binding;GO:0030170//pyridoxal phosphate binding	GO:0009058//biosynthetic process;GO:0009058//biosynthetic process
PDE_01918	5433.87	4408.91	1499.87	2032.66	2236.92	-1.28047	0.944042	1.45094e-06	2.59797e-05	hypothetical protein	-	-	GO:0016846//carbon-sulfur lyase activity	GO:0008152//metabolic process
PDE_01925	417.813	221.988	822.804	426.546	139.899	-1.57848	0.947391	1.90754e-11	9.06881e-10	hypothetical protein	K02917|1|2e-67|201|pcs:Pc20g03340|large subunit ribosomal protein L35Ae (A)	GO:0005622//intracellular;GO:0005840//ribosome;GO:0005622//intracellular;GO:0005840//ribosome	GO:0003735//structural constituent of ribosome;GO:0003735//structural constituent of ribosome	GO:0006412//translation;GO:0006412//translation
PDE_01936	32.0621	26.4405	32.9606	36.1168	15.0958	-1.08672	0.827981	0.0060238	0.0335093	hypothetical protein	-	-	-	-
PDE_01951	82.0925	56.4248	128.734	60.0038	30.8214	-1.41332	0.913878	8.41812e-09	2.30151e-07	hypothetical protein	-	-	-	-
PDE_01971	55.7506	30.9426	20.7863	23.3366	22.3595	-1.3181	0.891467	0.000110931	0.00121521	hypothetical protein	-	-	-	-
PDE_02003	84.3279	72.6082	338.567	164.723	32.9635	-1.35514	0.91229	0.0012813	0.00956965	hypothetical protein	K00390|1|0.0|562|nfi:NFIA_070720|phosphoadenosine phosphosulfate reductase [EC:1.8.4.8] (A);K00397|2|0.0|562|afm:AFUA_3G06540|anaerobic dimethyl sulfoxide reductase [EC:1.8.99.-] (A)	-	GO:0003824//catalytic activity;GO:0004604//phosphoadenylyl-sulfate reductase (thioredoxin) activity;GO:0004604//phosphoadenylyl-sulfate reductase (thioredoxin) activity	GO:0008152//metabolic process;GO:0009086//methionine biosynthetic process;GO:0019344//cysteine biosynthetic process;GO:0055114//oxidation-reduction process;GO:0019379//sulfate assimilation, phosphoadenylyl sulfate reduction by phosphoadenylyl-sulfate reductase (thioredoxin);GO:0055114//oxidation-reduction process
PDE_02091	78.7538	38.6257	263.757	108.722	21.7964	-1.85326	0.927242	1.23545e-15	1.01908e-13	hypothetical protein	K00053|1|0.0|754|ani:AN2526.2|ketol-acid reductoisomerase [EC:1.1.1.86] (A)	-	-	-
PDE_02128	208.576	130.91	463.172	98.9017	43.967	-2.24608	0.952536	1.03358e-24	1.95589e-22	hypothetical protein	-	-	-	-
PDE_02138	26.8933	15.1999	57.7	14.2962	6.52792	-2.04255	0.871819	2.86627e-12	1.54538e-10	hypothetical protein	K00507|1|6e-99|302|tve:TRV_02235|stearoyl-CoA desaturase (delta-9 desaturase) [EC:1.14.19.1] (A)	-	-	-
PDE_02139	34.9381	19.6024	77.0131	18.7301	12.1672	-1.5218	0.87175	2.63786e-07	5.42814e-06	hypothetical protein	K07750|1|5e-67|213|aor:AOR_1_348074|methylsterol monooxygenase [EC:1.14.13.72] (A);K00540|2|2e-65|207|afm:AFUA_2G01160|[EC:1.-.-.-] (A)	-	-	-
PDE_02140	47.5846	26.2814	154.857	32.6422	8.84548	-2.42748	0.918229	1.08621e-17	1.10347e-15	hypothetical protein	-	-	-	-
PDE_02145	638.881	210.013	169.995	143.652	185.312	-1.78559	0.955109	1.43313e-12	7.99489e-11	hypothetical protein	-	-	-	-
PDE_02146	693.849	664.44	332.468	552.725	302.394	-1.19819	0.93603	1.20208e-06	2.19305e-05	hypothetical protein	K01269|2|0.0|655|afm:AFUA_3G00650|aminopeptidase [EC:3.4.11.-] (A)	-	-	-
PDE_02152	142.429	84.5066	87.5505	304.461	57.6453	-1.30497	0.923858	6.37733e-07	1.23342e-05	hypothetical protein	K00627|4|4e-57|193|pcs:Pc20g01630|pyruvate dehydrogenase E2 component (dihydrolipoamide acetyltransferase) [EC:2.3.1.12] (A)	-	-	-
PDE_02156	39.9181	34.1413	52.0056	56.4845	18.9787	-1.07266	0.847042	0.000402344	0.00360541	hypothetical protein	K00948|1|0.0|757|pcs:Pc20g01660|ribose-phosphate pyrophosphokinase [EC:2.7.6.1] (A)	-	-	-
PDE_02182	300.515	169.552	293.349	218.205	138.815	-1.11427	0.922632	4.33894e-05	0.000538241	hypothetical protein	-	-	-	-
PDE_02183	64.1779	36.6108	63.3913	42.6826	26.9481	-1.25189	0.894679	0.000781892	0.0062519	hypothetical protein	-	-	-	-
PDE_02215	313.281	1098.87	194.776	110.57	126.204	-1.3117	0.935012	0.372311	0.625117	hypothetical protein	K14333|1|0.0|648|pcs:Pc20g01500|2,3-dihydroxybenzoate decarboxylase [EC:4.1.1.46] (A)	-	-	-
PDE_02248	706.149	418.979	1106.02	615.875	258.392	-1.45041	0.946252	2.35044e-09	7.31744e-08	hypothetical protein	K02924|1|5e-30|102|pan:PODANSg5137|large subunit ribosomal protein L39e (A)	-	-	-
PDE_02288	95.7831	98.7507	93.2391	31.0381	42.2884	-1.17951	0.904848	0.000203936	0.00202905	hypothetical protein	-	-	-	-
PDE_02298	56.4752	38.6504	82.1149	112.4	23.3786	-1.27243	0.889136	2.5271e-06	4.24896e-05	hypothetical protein	K11131|1|0.0|805|afm:AFUA_5G05710|H/ACA ribonucleoprotein complex subunit 4 [EC:5.4.99.-] (A)	-	-	-
PDE_02305	357.889	212.984	629.946	380.906	136.031	-1.39557	0.94045	7.86131e-09	2.16152e-07	hypothetical protein	K02893|1|1e-85|251|nfi:NFIA_037430|large subunit ribosomal protein L23Ae (A)	-	-	-
PDE_02315	25.3963	17.7262	20.3127	17.9238	11.0372	-1.20225	0.81586	0.00143251	0.0104499	hypothetical protein	K18532|1|9e-112|319|ani:AN8860.2|adenylate kinase [EC:2.7.4.3] (A)	-	-	-
PDE_02379	523.38	473.068	699.969	2095.31	180.689	-1.53435	0.947063	3.78232e-12	1.99471e-10	hypothetical protein	K03283|1|0.0|1213|pcs:Pc22g11240|heat shock 70kDa protein 1/8 (A)	-	-	-
PDE_02384	40.5765	25.4306	34.1024	63.5588	19.5919	-1.05039	0.845195	0.00945202	0.0478853	carbohydrate binding domain-containing protein	-	-	-	-
PDE_02426	35.196	22.6106	36.6833	17.2787	14.76	-1.25372	0.854035	5.95208e-06	9.20569e-05	hypothetical protein	K00223|1|0.0|948|pcs:Pc22g11560|delta24(24(1))-sterol reductase [EC:1.3.1.71] (A)	-	-	-
PDE_02440	125.778	84.9878	141.307	133.745	57.5732	-1.12741	0.910546	3.10186e-05	0.000398086	hypothetical protein	K00161|1|0.0|777|ang:ANI_1_1206064|pyruvate dehydrogenase E1 component alpha subunit [EC:1.2.4.1] (A)	-	-	-
PDE_02466	185.739	147.289	43.8325	179.804	69.099	-1.42654	0.93382	4.77223e-09	1.37074e-07	hypothetical protein	-	-	-	-
PDE_02469	49.2611	20.3293	25.514	27.8281	21.4319	-1.20069	0.875462	0.000118276	0.00128545	hypothetical protein	-	-	-	-
PDE_02475	28.2917	23.1421	18.4567	16.295	12.5664	-1.1708	0.823923	0.000197859	0.0019788	hypothetical protein	-	-	-	-
PDE_02512	32.2556	29.7966	32.9517	91.252	12.2076	-1.40177	0.858075	0.0959866	0.262956	hypothetical protein	-	-	-	-
PDE_02525	33.6959	18.4432	23.3003	31.8363	15.3305	-1.13616	0.83929	0.00225804	0.01505	hypothetical protein	-	-	-	-
PDE_02527	95.4964	63.8088	101.326	75.9603	39.3518	-1.27901	0.911547	3.18228e-07	6.47937e-06	hypothetical protein	-	-	-	-
PDE_02535	53.8454	40.2177	42.2665	24.8133	25.4611	-1.08053	0.869954	0.00012234	0.00132366	hypothetical protein	-	-	-	-
PDE_02536	295.168	177.494	483.973	207.921	137.429	-1.10285	0.92189	0.000503348	0.00438431	hypothetical protein	-	-	-	-
PDE_02566	23.7562	9.79012	11.2677	5.93819	7.40014	-1.68268	0.844901	0.00243441	0.0159551	hypothetical protein	-	-	-	-
PDE_02578	133.723	127.967	109.661	79.0092	57.9151	-1.20724	0.917677	0.133047	0.327194	hypothetical protein	K01736|1|0.0|725|aor:AOR_1_144154|chorismate synthase [EC:4.2.3.5] (A)	-	-	-
PDE_02590	484.054	263.058	897.699	450.308	150.542	-1.685	0.951345	1.05284e-13	7.05623e-12	hypothetical protein	K02942|1|2e-39|131|aor:AOR_1_848164|large subunit ribosomal protein LP1 (A)	GO:0005622//intracellular;GO:0005840//ribosome;GO:0005622//intracellular;GO:0005840//ribosome	GO:0003735//structural constituent of ribosome;GO:0003735//structural constituent of ribosome	GO:0006414//translational elongation;GO:0006414//translational elongation
PDE_02593	36.7942	73.1994	12.4784	22.83	18.0014	-1.03137	0.833299	0.00415679	0.0250263	hypothetical protein	K17989|1|1e-168|479|nfi:NFIA_018580|L-serine/L-threonine ammonia-lyase [EC:4.3.1.17 4.3.1.19] (A)	-	GO:0030170//pyridoxal phosphate binding	GO:0006520//cellular amino acid metabolic process
PDE_02595	56.2293	38.8165	32.8534	40.2281	19.2725	-1.54478	0.903864	1.34596e-06	2.42801e-05	hypothetical protein	K03019|1|4e-72|214|afv:AFLA_090770|DNA-directed RNA polymerase III subunit RPC10 (A)	-	GO:0003676//nucleic acid binding;GO:0008270//zinc ion binding;GO:0003677//DNA binding;GO:0003899//DNA-directed RNA polymerase activity;GO:0003676//nucleic acid binding;GO:0008270//zinc ion binding;GO:0003676//nucleic acid binding;GO:0008270//zinc ion binding;GO:0003677//DNA binding;GO:0003899//DNA-directed RNA polymerase activity	GO:0006351//transcription, DNA-templated;GO:0006351//transcription, DNA-templated;GO:0006351//transcription, DNA-templated;GO:0006351//transcription, DNA-templated;GO:0006351//transcription, DNA-templated
PDE_02599	408.445	226	808.571	466.235	149.692	-1.44814	0.942609	6.13324e-10	2.1292e-08	hypothetical protein	K02901|1|3e-90|263|nfi:NFIA_018370|large subunit ribosomal protein L27e (A)	GO:0005622//intracellular;GO:0005840//ribosome	GO:0003735//structural constituent of ribosome	GO:0006412//translation
PDE_02621	37.0774	22.6192	60.8841	49.8615	15.4479	-1.26313	0.859526	1.2943e-05	0.000187187	hypothetical protein	K11434|1|0.0|637|pcs:Pc13g02720|protein arginine N-methyltransferase 1 [EC:2.1.1.-] (A)	-	-	-
PDE_02687	496.586	268.914	975.258	546.909	206.859	-1.2634	0.936738	2.72613e-07	5.59785e-06	hypothetical protein	K02898|1|2e-72|216|ani:AN0570.2|large subunit ribosomal protein L26e (A)	GO:0005622//intracellular;GO:0005840//ribosome;GO:0015934//large ribosomal subunit	GO:0003735//structural constituent of ribosome;GO:0003735//structural constituent of ribosome	GO:0006412//translation;GO:0006412//translation
PDE_02693	411.172	242.497	893.594	433.979	143.986	-1.51382	0.944111	1.06367e-10	4.32993e-09	hypothetical protein	K02976|1|4e-81|237|ang:ANI_1_772164|small subunit ribosomal protein S26e (A)	GO:0005622//intracellular;GO:0005840//ribosome;GO:0005622//intracellular;GO:0005840//ribosome	GO:0003735//structural constituent of ribosome;GO:0003735//structural constituent of ribosome	GO:0006412//translation;GO:0006412//translation
PDE_02707	655.215	351.336	1230.34	727.704	234.724	-1.481	0.946925	7.9504e-11	3.36532e-09	hypothetical protein	K02872|1|1e-141|396|pcs:Pc13g01870|large subunit ribosomal protein L13Ae (A)	GO:0005840//ribosome;GO:0005840//ribosome;GO:0015934//large ribosomal subunit	GO:0003735//structural constituent of ribosome;GO:0003735//structural constituent of ribosome;GO:0003735//structural constituent of ribosome	GO:0006412//translation;GO:0006412//translation;GO:0006412//translation
PDE_02743	41.7903	30.9123	42.4554	50.6496	19.907	-1.0699	0.851048	0.0004048	0.00362092	hypothetical protein	K00222|1|0.0|891|pcs:Pc18g02000|delta14-sterol reductase [EC:1.3.1.70] (A)	GO:0016020//membrane	GO:0016628//oxidoreductase activity, acting on the CH-CH group of donors, NAD or NADP as acceptor;GO:0016628//oxidoreductase activity, acting on the CH-CH group of donors, NAD or NADP as acceptor	GO:0055114//oxidation-reduction process;GO:0055114//oxidation-reduction process
PDE_02754	229.217	116.006	478.389	256.63	74.9132	-1.61342	0.942643	1.29116e-12	7.28712e-11	hypothetical protein	K02985|1|3e-180|499|nfi:NFIA_019120|small subunit ribosomal protein S3e (A)	GO:0005622//intracellular;GO:0005840//ribosome;GO:0005840//ribosome;GO:0015935//small ribosomal subunit	GO:0003723//RNA binding;GO:0003723//RNA binding;GO:0003735//structural constituent of ribosome;GO:0003735//structural constituent of ribosome;GO:0003723//RNA binding;GO:0003735//structural constituent of ribosome	GO:0006412//translation;GO:0006412//translation;GO:0006412//translation
PDE_02775	484.865	246.328	954.436	529.544	165.759	-1.54849	0.947598	1.36449e-11	6.65086e-10	hypothetical protein	K02951|1|2e-98|283|ang:ANI_1_574164|small subunit ribosomal protein S12e (A)	GO:0005622//intracellular;GO:0005840//ribosome;GO:0005622//intracellular;GO:0005840//ribosome;GO:0005622//intracellular;GO:0005840//ribosome;GO:0005622//intracellular;GO:0005840//ribosome;GO:0005622//intracellular;GO:0005840//ribosome	GO:0003735//structural constituent of ribosome;GO:0003735//structural constituent of ribosome;GO:0003735//structural constituent of ribosome;GO:0003735//structural constituent of ribosome;GO:0003735//structural constituent of ribosome	GO:0006412//translation;GO:0006412//translation;GO:0006412//translation;GO:0006412//translation;GO:0006412//translation
PDE_02785	1172.61	973.211	1524.63	2973.56	525.127	-1.15898	0.935184	8.26647e-06	0.000123689	hypothetical protein	K05863|1|0.0|598|nfi:NFIA_019360|solute carrier family 25 (mitochondrial adenine nucleotide translocator), member 4/5/6/31 (A)	GO:0005743//mitochondrial inner membrane;GO:0005743//mitochondrial inner membrane;GO:0005743//mitochondrial inner membrane;GO:0005743//mitochondrial inner membrane;GO:0005743//mitochondrial inner membrane	GO:0005215//transporter activity;GO:0005215//transporter activity;GO:0005215//transporter activity;GO:0005215//transporter activity;GO:0005215//transporter activity	GO:0055085//transmembrane transport;GO:0055085//transmembrane transport;GO:0055085//transmembrane transport;GO:0055085//transmembrane transport;GO:0055085//transmembrane transport;GO:0055085//transmembrane transport;GO:0006810//transport;GO:0055085//transmembrane transport;GO:0006810//transport;GO:0055085//transmembrane transport;GO:0006810//transport;GO:0055085//transmembrane transport;GO:000681…
PDE_02793	296.33	154.921	569.914	341.94	107.223	-1.46658	0.940709	9.26416e-10	3.12617e-08	hypothetical protein	K02966|1|3e-96|278|pcs:Pc18g02490|small subunit ribosomal protein S19e (A)	GO:0005622//intracellular;GO:0005840//ribosome;GO:0005622//intracellular;GO:0005840//ribosome	GO:0003735//structural constituent of ribosome;GO:0003735//structural constituent of ribosome	GO:0006412//translation;GO:0006412//translation
PDE_02816	125.614	129.24	47.3856	67.8826	45.2689	-1.4724	0.928502	0.0345571	0.126644	hypothetical protein	-	GO:0016021//integral component of membrane	-	GO:0055085//transmembrane transport
PDE_02823	64.3056	40.2116	67.0068	43.1705	22.2486	-1.53123	0.909096	3.82593e-10	1.39864e-08	hypothetical protein	-	-	-	-
PDE_02829	52.607	30.4798	77.9674	40.2428	24.5204	-1.10127	0.870127	0.00106887	0.0081611	hypothetical protein	K12668|1|4e-75|225|act:ACLA_030760|oligosaccharyltransferase complex subunit epsilon (A)	GO:0008250//oligosaccharyltransferase complex;GO:0016021//integral component of membrane	GO:0004579//dolichyl-diphosphooligosaccharide-protein glycotransferase activity	-
PDE_02837	60.0881	55.9206	32.3839	36.0635	28.9354	-1.05424	0.873476	0.000395229	0.00355485	hypothetical protein	-	-	-	-
PDE_02842	155.536	100.646	149.569	101.387	54.569	-1.5111	0.933233	8.82908e-11	3.68872e-09	hypothetical protein	K09831|1|0.0|990|pcs:Pc16g08330|C-22 sterol desaturase [EC:1.14.14.-] (A)	-	GO:0016705//oxidoreductase activity, acting on paired donors, with incorporation or reduction of molecular oxygen;GO:0005506//iron ion binding;GO:0009055//electron carrier activity;GO:0016705//oxidoreductase activity, acting on paired donors, with incorporation or reduction of molecular oxygen;GO:0020037//heme binding;GO:0004497//monooxygenase activity;GO:0005506//iron ion binding;GO:0016705//oxi…	GO:0055114//oxidation-reduction process;GO:0055114//oxidation-reduction process;GO:0055114//oxidation-reduction process;GO:0055114//oxidation-reduction process;GO:0055114//oxidation-reduction process;GO:0055114//oxidation-reduction process;GO:0055114//oxidation-reduction process;GO:0055114//oxidation-reduction process;GO:0055114//oxidation-reduction process;GO:0055114//oxidation-reduction process…
PDE_02848	131.856	79.5277	214.791	148.124	65.8959	-1.0007	0.897666	0.000389665	0.00350808	hypothetical protein	K15219|1|5e-137|413|pcs:Pc16g08410|RNA polymerase I-specific transcription initiation factor RRN7 (A)	GO:0005840//ribosome	GO:0005515//protein binding;GO:0003735//structural constituent of ribosome;GO:0005515//protein binding	GO:0006412//translation
PDE_02864	535.091	282.081	1035.03	638.702	174.69	-1.61499	0.950136	3.20672e-13	1.98385e-11	hypothetical protein	K02995|1|2e-132|374|ani:AN0465.2|small subunit ribosomal protein S8e (A)	GO:0005622//intracellular;GO:0005840//ribosome	GO:0003735//structural constituent of ribosome	GO:0006412//translation
PDE_02884	49.6653	33.2392	85.1416	48.6441	20.9967	-1.24208	0.878846	2.30633e-05	0.000311743	hypothetical protein	K09829|1|4e-143|403|pcs:Pc16g08670|C-8 sterol isomerase [EC:5.-.-.-] (A)	GO:0005783//endoplasmic reticulum	GO:0000247//C-8 sterol isomerase activity	GO:0006696//ergosterol biosynthetic process
PDE_02907	216.124	122.695	424.667	262.909	84.4751	-1.35526	0.933406	3.51427e-08	8.71882e-07	hypothetical protein	K02877|1|1e-146|409|aor:AOR_1_1580154|large subunit ribosomal protein L15e (A)	GO:0005622//intracellular;GO:0005840//ribosome;GO:0005840//ribosome	GO:0003735//structural constituent of ribosome;GO:0003735//structural constituent of ribosome	GO:0006412//translation;GO:0006412//translation
PDE_02916	303.129	172.863	612.361	356.229	124.951	-1.27857	0.933199	2.73906e-07	5.61246e-06	hypothetical protein	K02882|1|7e-112|321|pcs:Pc16g09260|large subunit ribosomal protein L18Ae (A)	GO:0005840//ribosome	GO:0003735//structural constituent of ribosome	GO:0006412//translation
PDE_02957	24.1668	21.679	127.304	38.6513	9.65766	-1.32328	0.821161	2.44758e-05	0.000326265	hypothetical protein	K14708|1|0.0|1348|pcs:Pc16g10020|solute carrier family 26 (sodium-independent sulfate anion transporter), member 11 (A)	GO:0016021//integral component of membrane;GO:0016020//membrane	GO:0008271//secondary active sulfate transmembrane transporter activity;GO:0015116//sulfate transmembrane transporter activity;GO:0008271//secondary active sulfate transmembrane transporter activity	GO:0008272//sulfate transport;GO:0008272//sulfate transport;GO:0008272//sulfate transport;GO:0055085//transmembrane transport
PDE_02971	257.813	148.556	508.879	298.987	112.432	-1.19727	0.927777	1.82849e-06	3.18534e-05	hypothetical protein	K02941|1|1e-165|466|act:ACLA_029570|large subunit ribosomal protein LP0 (A)	GO:0005622//intracellular;GO:0005622//intracellular;GO:0005840//ribosome	GO:0003735//structural constituent of ribosome	GO:0042254//ribosome biogenesis;GO:0006414//translational elongation
PDE_02975	213.449	223.456	204.687	471.619	78.9994	-1.43398	0.935823	8.17988e-07	1.55402e-05	hypothetical protein	K09503|1|0.0|698|afv:AFLA_030180|DnaJ homolog subfamily A member 2 (A)	-	GO:0005524//ATP binding;GO:0051082//unfolded protein binding;GO:0031072//heat shock protein binding;GO:0051082//unfolded protein binding;GO:0031072//heat shock protein binding;GO:0051082//unfolded protein binding	GO:0006457//protein folding;GO:0009408//response to heat
PDE_03005	335.664	225.759	639.393	341.386	148.399	-1.17754	0.928226	6.39152e-06	9.77568e-05	hypothetical protein	K02870|1|4e-111|316|nfi:NFIA_021260|large subunit ribosomal protein L12e (A)	GO:0005840//ribosome;GO:0005840//ribosome	GO:0003735//structural constituent of ribosome;GO:0003735//structural constituent of ribosome	GO:0006412//translation;GO:0006412//translation
PDE_03013	609.306	297.472	1146.58	538.932	174.036	-1.80778	0.955679	1.55342e-15	1.24934e-13	hypothetical protein	K02905|1|7e-40|129|act:ACLA_031290|large subunit ribosomal protein L29e (A)	GO:0005622//intracellular;GO:0005840//ribosome	GO:0003735//structural constituent of ribosome	GO:0006412//translation
PDE_03033	48.6011	40.0539	63.7365	28.5012	21.4726	-1.17849	0.872181	0.00377773	0.0231196	hypothetical protein	-	-	-	-
PDE_03041	86.6696	58.3438	85.0563	58.75	38.9663	-1.1533	0.900307	0.000685699	0.00561296	hypothetical protein	K09658|1|2e-44|142|afv:AFLA_080460|dolichyl-phosphate mannosyltransferase polypeptide 2, regulatory subunit (A)	GO:0030176//integral component of endoplasmic reticulum membrane	-	GO:0009059//macromolecule biosynthetic process
PDE_03043	40.7052	30.7478	57.2495	52.0058	17.1729	-1.24508	0.865724	6.15411e-05	0.000723426	hypothetical protein	-	-	GO:0003824//catalytic activity;GO:0008081//phosphoric diester hydrolase activity;GO:0046872//metal ion binding	-
PDE_03044	816.323	483.707	2779.3	680.427	255.938	-1.67335	0.954073	1.39737e-14	1.01399e-12	hypothetical protein	-	-	-	-
PDE_03053	1324.64	587.371	392.31	414.96	660.011	-1.00503	0.922615	0.000445873	0.00394059	hypothetical protein	K03809|1|1e-120|343|nfi:NFIA_021810|Trp repressor binding protein (A)	-	GO:0010181//FMN binding;GO:0016491//oxidoreductase activity;GO:0010181//FMN binding;GO:0016491//oxidoreductase activity;GO:0010181//FMN binding	GO:0045892//negative regulation of transcription, DNA-templated
PDE_03065	493.204	322.205	432.186	263.691	214.068	-1.20411	0.933699	1.24642e-06	2.25689e-05	hypothetical protein	K01858|1|0.0|999|pcs:Pc22g25050|myo-inositol-1-phosphate synthase [EC:5.5.1.4] (A)	-	GO:0004512//inositol-3-phosphate synthase activity	GO:0006021//inositol biosynthetic process;GO:0008654//phospholipid biosynthetic process
PDE_03085	48.8566	33.973	45.9549	51.6647	23.0159	-1.08593	0.864429	0.000803783	0.00639514	hypothetical protein	K17428|1|1e-109|318|act:ACLA_070100|large subunit ribosomal protein L47, mitochondrial (A)	GO:0005761//mitochondrial ribosome	GO:0003735//structural constituent of ribosome	GO:0006412//translation
PDE_03149	25.6692	15.9693	27.9889	25.1373	10.6488	-1.26935	0.823354	0.00211493	0.0142836	hypothetical protein	-	GO:0016021//integral component of membrane	-	-
PDE_03178	252.74	151.436	499.78	313.456	111.406	-1.18183	0.925567	2.71348e-06	4.53862e-05	hypothetical protein	K02925|1|0.0|773|pcs:Pc20g14180|large subunit ribosomal protein L3e (A)	GO:0005622//intracellular;GO:0005840//ribosome	GO:0003735//structural constituent of ribosome	GO:0006412//translation
PDE_03183	39.2514	26.4581	35.4224	14.7869	15.929	-1.30108	0.866812	0.000831718	0.00657944	hypothetical protein	-	-	-	-
PDE_03205	24.8651	17.6808	14.5521	65.2122	11.2441	-1.14496	0.806364	0.000872505	0.00683486	hypothetical protein	K15102|1|0.0|580|pcs:Pc20g14390|solute carrier family 25 (mitochondrial phosphate transporter), member 3 (A)	-	-	-
PDE_03214	76.8448	54.3656	89.3708	92.707	36.7173	-1.06549	0.888946	0.00287602	0.0184183	hypothetical protein	K17781|1|5e-39|129|afv:AFLA_135030|mitochondrial import inner membrane translocase subunit TIM13 (A)	-	-	-
PDE_03236	84.4591	46.8978	98.7821	43.5668	29.5978	-1.51276	0.91797	1.77521e-07	3.74891e-06	hypothetical protein	-	-	-	-
PDE_03346	120.083	80.6986	186.837	117.481	38.2309	-1.65122	0.934545	6.17282e-14	4.25528e-12	hypothetical protein	-	-	-	-
PDE_03365	470.958	950.142	5.17067	7.78979	34.9612	-3.75177	0.96811	0.00365866	0.022519	hypothetical protein	K00517|2|0.0|873|afm:AFUA_6G02210|[EC:1.14.-.-] (A)	-	GO:0005506//iron ion binding;GO:0009055//electron carrier activity;GO:0016705//oxidoreductase activity, acting on paired donors, with incorporation or reduction of molecular oxygen;GO:0020037//heme binding;GO:0016705//oxidoreductase activity, acting on paired donors, with incorporation or reduction of molecular oxygen;GO:0005506//iron ion binding;GO:0016705//oxidoreductase activity, acting on pai…	GO:0055114//oxidation-reduction process;GO:0055114//oxidation-reduction process;GO:0055114//oxidation-reduction process;GO:0055114//oxidation-reduction process;GO:0055114//oxidation-reduction process;GO:0055114//oxidation-reduction process;GO:0055114//oxidation-reduction process;GO:0055114//oxidation-reduction process;GO:0055114//oxidation-reduction process;GO:0055114//oxidation-reduction process…
PDE_03371	115.947	84.0388	100.163	94.6522	52.4629	-1.1441	0.909147	4.91082e-05	0.000599928	hypothetical protein	K17788|1|7e-100|292|nfi:NFIA_048530|altered inheritance of mitochondria protein 13 (A)	-	-	-
PDE_03391	49.6635	31.3985	37.6061	33.0506	23.2498	-1.09497	0.865793	0.000171647	0.00176418	hypothetical protein	-	-	GO:0005515//protein binding	-
PDE_03392	88.0403	112.23	63.2393	36.1067	15.6372	-2.49318	0.940416	0.0259182	0.102768	hypothetical protein	K14454|1|0.0|785|pcs:Pc22g23830|aspartate aminotransferase, cytoplasmic [EC:2.6.1.1] (A)	-	GO:0030170//pyridoxal phosphate binding;GO:0003824//catalytic activity;GO:0030170//pyridoxal phosphate binding;GO:0008483//transaminase activity;GO:0008483//transaminase activity;GO:0008483//transaminase activity;GO:0008483//transaminase activity	GO:0009058//biosynthetic process;GO:0009058//biosynthetic process;GO:0006520//cellular amino acid metabolic process;GO:0006520//cellular amino acid metabolic process;GO:0006520//cellular amino acid metabolic process;GO:0006520//cellular amino acid metabolic process
PDE_03397	317.512	178.08	489.193	284.92	127.766	-1.31331	0.935288	9.57317e-08	2.14862e-06	hypothetical protein	K02896|1|5e-86|253|pbl:PAAG_00205|large subunit ribosomal protein L24e (A)	-	-	-
PDE_03417	50.2848	29.796	13.6551	51.382	6.78315	-2.8901	0.926051	8.81707e-12	4.45516e-10	hypothetical protein	-	-	-	-
PDE_03437	71.1185	12.4615	296.508	58.7658	20.3348	-1.80628	0.923374	0.00874816	0.044861	hypothetical protein	-	-	-	-
PDE_03454	34.6772	18.9588	151.657	35.9232	9.88668	-1.81043	0.885545	4.00576e-10	1.45885e-08	hypothetical protein	-	-	-	-
PDE_03475	1559.22	751.523	1166.82	1626.35	128.378	-3.60235	0.971391	1.68235e-23	2.75193e-21	hypothetical protein	-	GO:0016021//integral component of membrane;GO:0016020//membrane;GO:0016020//membrane;GO:0016020//membrane;GO:0016020//membrane;GO:0016020//membrane;GO:0016020//membrane;GO:0016020//membrane;GO:0016020//membrane;GO:0016020//membrane	GO:0022857//transmembrane transporter activity;GO:0005215//transporter activity;GO:0005215//transporter activity;GO:0005215//transporter activity;GO:0022891//substrate-specific transmembrane transporter activity;GO:0022891//substrate-specific transmembrane transporter activity;GO:0022891//substrate-specific transmembrane transporter activity;GO:0022891//substrate-specific transmembrane transporte…	GO:0055085//transmembrane transport;GO:0006810//transport;GO:0055085//transmembrane transport;GO:0006810//transport;GO:0055085//transmembrane transport;GO:0006810//transport;GO:0055085//transmembrane transport;GO:0055085//transmembrane transport;GO:0055085//transmembrane transport;GO:0055085//transmembrane transport;GO:0055085//transmembrane transport;GO:0055085//transmembrane transport;GO:005508…
PDE_03478	75.5218	75.4862	25.0143	38.6664	37.3422	-1.01609	0.880331	0.000930065	0.00723293	hypothetical protein	-	-	-	-
PDE_03482	267.091	265.847	181.956	300.584	132.991	-1.00601	0.911979	0.000945451	0.00733484	hypothetical protein	-	-	-	-
PDE_03483	493.191	784.818	176.466	794.464	154.303	-1.67638	0.951518	6.26793e-07	1.21469e-05	hypothetical protein	K01638|1|0.0|1045|pcs:Pc20g13550|malate synthase [EC:2.3.3.9] (A)	-	GO:0004474//malate synthase activity;GO:0004474//malate synthase activity;GO:0004474//malate synthase activity	GO:0006097//glyoxylate cycle;GO:0006097//glyoxylate cycle;GO:0006097//glyoxylate cycle
PDE_03487	227.188	338.601	51.721	117.344	87.3386	-1.37919	0.934701	5.51859e-09	1.56188e-07	hypothetical protein	K01647|1|0.0|873|pcs:Pc20g13510|citrate synthase [EC:2.3.3.1] (A)	-	GO:0046912//transferase activity, transferring acyl groups, acyl groups converted into alkyl on transfer;GO:0046912//transferase activity, transferring acyl groups, acyl groups converted into alkyl on transfer;GO:0046912//transferase activity, transferring acyl groups, acyl groups converted into alkyl on transfer;GO:0046912//transferase activity, transferring acyl groups, acyl groups converted in…	GO:0044262//cellular carbohydrate metabolic process;GO:0006099//tricarboxylic acid cycle;GO:0044262//cellular carbohydrate metabolic process;GO:0044262//cellular carbohydrate metabolic process;GO:0044262//cellular carbohydrate metabolic process;GO:0044262//cellular carbohydrate metabolic process;GO:0044262//cellular carbohydrate metabolic process;GO:0044262//cellular carbohydrate metabolic process
PDE_03500	25.6321	7.21203	2.23655	4.09701	5.75932	-2.15398	0.870679	3.78419e-17	3.61596e-15	hypothetical protein	-	GO:0016020//membrane	GO:0015171//amino acid transmembrane transporter activity	GO:0003333//amino acid transmembrane transport
PDE_03501	283.994	325.732	82.1704	127.748	103.863	-1.45118	0.939363	2.32835e-10	8.84682e-09	hypothetical protein	K01720|1|0.0|1034|pcs:Pc20g13350|2-methylcitrate dehydratase [EC:4.2.1.79] (A)	-	GO:0047547//2-methylcitrate dehydratase activity;GO:0047547//2-methylcitrate dehydratase activity;GO:0051537//2 iron, 2 sulfur cluster binding	GO:0019543//propionate catabolic process;GO:0019629//propionate catabolic process, 2-methylcitrate cycle
PDE_03505	19.0773	11.0288	24.0901	9.72077	6.0334	-1.66081	0.818726	1.43893e-09	4.64452e-08	hypothetical protein	K00155|3|0.0|967|afm:AFUA_6G03770|[EC:1.2.1.-] (A)	-	GO:0016491//oxidoreductase activity;GO:0016491//oxidoreductase activity;GO:0016491//oxidoreductase activity	GO:0008152//metabolic process;GO:0055114//oxidation-reduction process;GO:0008152//metabolic process;GO:0055114//oxidation-reduction process;GO:0008152//metabolic process;GO:0055114//oxidation-reduction process
PDE_03512	331.624	187.495	679.46	402.769	142.069	-1.22296	0.93142	1.67624e-06	2.936e-05	hypothetical protein	K02875|1|1e-93|271|pcs:Pc20g13260|large subunit ribosomal protein L14e (A)	GO:0005622//intracellular;GO:0005840//ribosome	GO:0003735//structural constituent of ribosome	GO:0006412//translation
PDE_03554	57.7506	33.915	101.841	38.4734	25.9422	-1.15453	0.881073	0.000378652	0.00342169	hypothetical protein	K00505|1|1e-164|466|pcs:Pc15g00990|tyrosinase [EC:1.14.18.1] (A)	-	GO:0016491//oxidoreductase activity;GO:0016491//oxidoreductase activity;GO:0016491//oxidoreductase activity;GO:0016491//oxidoreductase activity;GO:0016491//oxidoreductase activity;GO:0016491//oxidoreductase activity;GO:0016491//oxidoreductase activity	GO:0008152//metabolic process;GO:0008152//metabolic process;GO:0008152//metabolic process;GO:0008152//metabolic process;GO:0008152//metabolic process;GO:0008152//metabolic process;GO:0008152//metabolic process
PDE_03617	54.642	37.3745	64.3751	33.5454	26.9004	-1.02238	0.86196	0.000459013	0.00404191	hypothetical protein	K01379|5|6e-133|396|afm:AFUA_4G07040|cathepsin D [EC:3.4.23.5] (A)	-	GO:0004190//aspartic-type endopeptidase activity;GO:0004190//aspartic-type endopeptidase activity;GO:0004190//aspartic-type endopeptidase activity;GO:0004190//aspartic-type endopeptidase activity;GO:0004190//aspartic-type endopeptidase activity;GO:0004190//aspartic-type endopeptidase activity;GO:0004190//aspartic-type endopeptidase activity	GO:0006508//proteolysis;GO:0006508//proteolysis;GO:0006508//proteolysis;GO:0006508//proteolysis;GO:0006508//proteolysis;GO:0006508//proteolysis;GO:0006508//proteolysis
PDE_03642	109.202	75.1541	118.375	117.717	52.069	-1.0685	0.90162	0.00013049	0.00139619	hypothetical protein	K00611|1|0.0|623|nfi:NFIA_109030|ornithine carbamoyltransferase [EC:2.1.3.3] (A)	-	GO:0016597//amino acid binding;GO:0016743//carboxyl- or carbamoyltransferase activity;GO:0016743//carboxyl- or carbamoyltransferase activity;GO:0016743//carboxyl- or carbamoyltransferase activity;GO:0016743//carboxyl- or carbamoyltransferase activity;GO:0016743//carboxyl- or carbamoyltransferase activity;GO:0016743//carboxyl- or carbamoyltransferase activity;GO:0016597//amino acid binding;GO:0016…	GO:0006520//cellular amino acid metabolic process;GO:0006520//cellular amino acid metabolic process;GO:0006520//cellular amino acid metabolic process;GO:0006520//cellular amino acid metabolic process;GO:0006520//cellular amino acid metabolic process;GO:0006520//cellular amino acid metabolic process;GO:0006520//cellular amino acid metabolic process
PDE_03657	135.175	91.8242	185.067	111.845	62.3771	-1.11574	0.911547	4.97495e-05	0.000606994	hypothetical protein	-	GO:0016021//integral component of membrane;GO:0016021//integral component of membrane	-	GO:0006810//transport;GO:0006810//transport
PDE_03668	282.013	157.034	596.793	297.759	82.3328	-1.77622	0.949031	3.47764e-14	2.46785e-12	hypothetical protein	K02920|1|3e-64|193|ang:ANI_1_384184|large subunit ribosomal protein L36e (A)	GO:0005622//intracellular;GO:0005840//ribosome;GO:0005622//intracellular;GO:0005840//ribosome	GO:0003735//structural constituent of ribosome;GO:0003735//structural constituent of ribosome	GO:0006412//translation;GO:0006412//translation
PDE_03752	121.279	97.7328	144.743	123.046	59.8953	-1.01781	0.897545	0.000507736	0.00441059	hypothetical protein	K03248|1|0.0|503|afv:AFLA_044710|translation initiation factor 3 subunit G (A)	GO:0005737//cytoplasm;GO:0005852//eukaryotic translation initiation factor 3 complex	GO:0003676//nucleic acid binding;GO:0003676//nucleic acid binding;GO:0003743//translation initiation factor activity;GO:0003676//nucleic acid binding	-
PDE_03760	132.04	104.054	192.511	423.372	62.3978	-1.08141	0.907922	4.77996e-05	0.000586168	hypothetical protein	K04043|1|0.0|1208|pcs:Pc22g19990|molecular chaperone DnaK (A)	-	GO:0005524//ATP binding;GO:0051082//unfolded protein binding;GO:0005524//ATP binding;GO:0051082//unfolded protein binding	GO:0006457//protein folding;GO:0006457//protein folding
PDE_03771	28.8497	15.9689	79.0738	38.6492	9.62274	-1.58404	0.859042	3.50492e-11	1.58065e-09	hypothetical protein	K01955|1|0.0|2199|pcs:Pc22g20150|carbamoyl-phosphate synthase large subunit [EC:6.3.5.5] (A)	-	GO:0005524//ATP binding;GO:0005524//ATP binding;GO:0005524//ATP binding;GO:0005524//ATP binding;GO:0005524//ATP binding;GO:0046872//metal ion binding;GO:0005524//ATP binding;GO:0046872//metal ion binding;GO:0005524//ATP binding;GO:0003824//catalytic activity;GO:0003824//catalytic activity	GO:0006807//nitrogen compound metabolic process;GO:0006807//nitrogen compound metabolic process;GO:0006807//nitrogen compound metabolic process;GO:0006807//nitrogen compound metabolic process;GO:0006807//nitrogen compound metabolic process;GO:0006807//nitrogen compound metabolic process;GO:0006807//nitrogen compound metabolic process;GO:0008152//metabolic process;GO:0008152//metabolic process;GO:…
PDE_03776	93.4891	184.324	59.0367	77.3819	44.1887	-1.08112	0.897372	0.0548346	0.177309	hypothetical protein	-	-	GO:0005509//calcium ion binding	-
PDE_03779	494.227	306.381	970.572	487.997	167.469	-1.56128	0.94784	1.758e-11	8.44101e-10	hypothetical protein	K02943|1|2e-34|118|cpw:CPC735_038900|large subunit ribosomal protein LP2 (A)	GO:0005622//intracellular;GO:0005840//ribosome;GO:0005622//intracellular;GO:0005840//ribosome	GO:0003735//structural constituent of ribosome;GO:0003735//structural constituent of ribosome	GO:0006414//translational elongation;GO:0006414//translational elongation
PDE_03780	466.57	272.72	890.489	537.634	194.748	-1.26048	0.936307	3.68123e-07	7.43255e-06	hypothetical protein	K02958|1|2e-108|308|pcs:Pc22g20260|small subunit ribosomal protein S15e (A)	GO:0005840//ribosome;GO:0005840//ribosome;GO:0005840//ribosome;GO:0005840//ribosome;GO:0015935//small ribosomal subunit;GO:0005840//ribosome	GO:0003723//RNA binding;GO:0003735//structural constituent of ribosome;GO:0003735//structural constituent of ribosome;GO:0003735//structural constituent of ribosome;GO:0003735//structural constituent of ribosome;GO:0003735//structural constituent of ribosome;GO:0003735//structural constituent of ribosome	GO:0006412//translation;GO:0006412//translation;GO:0006412//translation;GO:0006412//translation;GO:0006412//translation;GO:0006412//translation
PDE_03791	136.777	110.497	97.484	59.1182	63.2721	-1.11218	0.91027	0.000175074	0.00179367	hypothetical protein	-	-	GO:0003824//catalytic activity;GO:0050662//coenzyme binding	GO:0044237//cellular metabolic process
PDE_03793	433.424	255.651	843.423	460.32	181.041	-1.25946	0.935789	3.91787e-07	7.86099e-06	hypothetical protein	K02962|1|6e-99|283|pcs:Pc22g20470|small subunit ribosomal protein S17e (A)	GO:0005622//intracellular;GO:0005840//ribosome;GO:0005622//intracellular;GO:0005840//ribosome;GO:0005622//intracellular;GO:0005840//ribosome	GO:0003735//structural constituent of ribosome;GO:0003735//structural constituent of ribosome;GO:0003735//structural constituent of ribosome	GO:0006412//translation;GO:0006412//translation;GO:0006412//translation
PDE_03805	17.5124	21.6953	7.9492	6.1635	3.62758	-2.2713	0.833489	2.02121e-05	0.000276691	hypothetical protein	K00826|1|0.0|709|pcs:Pc22g20630|branched-chain amino acid aminotransferase [EC:2.6.1.42] (A)	-	GO:0003824//catalytic activity;GO:0003824//catalytic activity	GO:0008152//metabolic process;GO:0008152//metabolic process
PDE_03807	342.068	208.536	546.501	368.391	155.414	-1.13817	0.92662	1.40089e-05	0.00020119	hypothetical protein	K02955|1|1e-92|268|act:ACLA_069460|small subunit ribosomal protein S14e (A)	GO:0005840//ribosome;GO:0005840//ribosome	GO:0003735//structural constituent of ribosome;GO:0003735//structural constituent of ribosome	GO:0006412//translation;GO:0006412//translation
PDE_03816	23.197	6.76854	65.2799	70.135	5.82954	-1.99248	0.85609	1.58224e-09	5.05634e-08	hypothetical protein	-	GO:0016021//integral component of membrane	GO:0022857//transmembrane transporter activity	GO:0055085//transmembrane transport
PDE_03843	439.813	252.817	870.868	542.711	162.488	-1.43656	0.942747	1.33374e-09	4.31945e-08	hypothetical protein	K02960|1|3e-98|282|afm:AFUA_2G10500|small subunit ribosomal protein S16e (A)	GO:0005840//ribosome;GO:0005840//ribosome	GO:0003735//structural constituent of ribosome;GO:0003735//structural constituent of ribosome	GO:0006412//translation;GO:0006412//translation
PDE_03876	141.824	131.096	136.582	197.116	63.9646	-1.14876	0.914517	0.0023104	0.0153038	hypothetical protein	-	-	-	-
PDE_03882	14.7317	7.49669	147.78	13.5804	3.15399	-2.22368	0.810163	1.24609e-06	2.25689e-05	hypothetical protein	-	-	-	-
PDE_03907	142.967	165.507	41.5322	107.576	42.1719	-1.76133	0.939639	3.52378e-14	2.48234e-12	hypothetical protein	K07511|1|0.0|546|afv:AFLA_043610|enoyl-CoA hydratase [EC:4.2.1.17] (A)	-	GO:0003824//catalytic activity;GO:0003824//catalytic activity	GO:0008152//metabolic process;GO:0008152//metabolic process
PDE_03949	20.67	11.9573	19.4624	13.4007	8.05372	-1.35981	0.806502	0.000216945	0.00212994	hypothetical protein	K10703|1|2e-122|351|pcs:Pc22g12490|very-long-chain (3R)-3-hydroxyacyl-CoA dehydratase [EC:4.2.1.134] (A)	-	-	-
PDE_03964	211.057	147.778	124.498	117.059	0.0727376	-12.7372	0.989537	3.43304e-241	3.31322e-237	hypothetical protein	-	GO:0005634//nucleus;GO:0005634//nucleus;GO:0005634//nucleus;GO:0005634//nucleus;GO:0005634//nucleus;GO:0005634//nucleus	GO:0000981//sequence-specific DNA binding RNA polymerase II transcription factor activity;GO:0008270//zinc ion binding;GO:0000981//sequence-specific DNA binding RNA polymerase II transcription factor activity;GO:0008270//zinc ion binding;GO:0003677//DNA binding;GO:0008270//zinc ion binding;GO:0000981//sequence-specific DNA binding RNA polymerase II transcription factor activity;GO:0008270//zinc i…	GO:0006355//regulation of transcription, DNA-templated;GO:0006355//regulation of transcription, DNA-templated;GO:0006351//transcription, DNA-templated;GO:0006355//regulation of transcription, DNA-templated;GO:0006355//regulation of transcription, DNA-templated;GO:0006351//transcription, DNA-templated
PDE_03966	174.704	20.3908	123.767	38.3466	2.44242	-6.16046	0.980213	7.52026e-164	2.41927e-160	putative alpha-glucosidase	K01187|1|0.0|1458|pcs:Pc22g12350|alpha-glucosidase [EC:3.2.1.20] (A)	-	GO:0004553//hydrolase activity, hydrolyzing O-glycosyl compounds;GO:0004553//hydrolase activity, hydrolyzing O-glycosyl compounds;GO:0004553//hydrolase activity, hydrolyzing O-glycosyl compounds	GO:0005975//carbohydrate metabolic process;GO:0005975//carbohydrate metabolic process;GO:0005975//carbohydrate metabolic process
PDE_03990	1256.58	945.283	1017.08	767.561	584.031	-1.10539	0.931766	2.6337e-05	0.000346293	hypothetical protein	-	-	-	-
PDE_04031	50.9526	74.5535	13.3546	25.3067	11.5763	-2.13798	0.916986	2.11242e-06	3.63405e-05	hypothetical protein	K01697|1|0.0|805|nfi:NFIA_083350|cystathionine beta-synthase [EC:4.2.1.22] (A)	GO:0005737//cytoplasm	GO:0030554//adenyl nucleotide binding;GO:0030554//adenyl nucleotide binding;GO:0004122//cystathionine beta-synthase activity;GO:0030554//adenyl nucleotide binding	GO:0006535//cysteine biosynthetic process from serine;GO:0019343//cysteine biosynthetic process via cystathionine
PDE_04039	45.0264	29.2338	73.7222	24.226	19.8469	-1.18186	0.867226	8.29521e-05	0.000945183	hypothetical protein	K01581|1|9e-121|355|abe:ARB_07853|ornithine decarboxylase [EC:4.1.1.17] (A)	-	GO:0003824//catalytic activity;GO:0003824//catalytic activity;GO:0003824//catalytic activity;GO:0003824//catalytic activity	GO:0006596//polyamine biosynthetic process;GO:0006596//polyamine biosynthetic process;GO:0006596//polyamine biosynthetic process;GO:0006596//polyamine biosynthetic process
PDE_04048	149.031	153.275	75.3062	50.478	73.5242	-1.01932	0.903087	0.00036681	0.00332715	hypothetical protein	K14213|1|0.0|727|pcs:Pc13g05440|Xaa-Pro dipeptidase [EC:3.4.13.9] (A)	-	GO:0004177//aminopeptidase activity;GO:0030145//manganese ion binding;GO:0004177//aminopeptidase activity;GO:0030145//manganese ion binding	GO:0009987//cellular process
PDE_04054	37.4962	23.7729	38.6655	21.6699	11.2211	-1.74052	0.887807	6.99922e-08	1.62379e-06	hypothetical protein	K17362|2|1e-68|207|act:ACLA_079450|acyl-coenzyme A thioesterase 13 [EC:3.1.2.-] (A)	-	-	-
PDE_04056	31.0541	25.6765	30.7572	34.684	12.7362	-1.28585	0.845972	0.000572006	0.00486811	hypothetical protein	-	-	GO:0003677//DNA binding;GO:0003713//transcription coactivator activity	GO:0006355//regulation of transcription, DNA-templated
PDE_04060	301.468	171.459	570.199	342.644	112.852	-1.41757	0.939242	4.10405e-09	1.20757e-07	hypothetical protein	K02883|1|1e-125|354|pcs:Pc13g05540|large subunit ribosomal protein L18e (A)	GO:0005622//intracellular;GO:0005840//ribosome	GO:0003735//structural constituent of ribosome	GO:0006412//translation
PDE_04090	216.592	203.584	55.7354	306.098	78.3541	-1.4669	0.93755	2.62593e-10	9.86102e-09	hypothetical protein	K00600|1|0.0|944|pcs:Pc13g05010|glycine hydroxymethyltransferase [EC:2.1.2.1] (A)	-	GO:0004372//glycine hydroxymethyltransferase activity;GO:0004372//glycine hydroxymethyltransferase activity;GO:0030170//pyridoxal phosphate binding;GO:0004372//glycine hydroxymethyltransferase activity	GO:0006544//glycine metabolic process;GO:0006563//L-serine metabolic process;GO:0006544//glycine metabolic process;GO:0006563//L-serine metabolic process;GO:0006544//glycine metabolic process;GO:0006563//L-serine metabolic process
PDE_04101	236.197	184.331	102.431	117.034	85.2355	-1.47047	0.93843	1.76141e-09	5.53724e-08	hypothetical protein	-	-	-	-
PDE_04105	27.693	24.7977	37.6951	22.1161	10.5841	-1.38762	0.842467	1.29563e-05	0.000187187	hypothetical protein	-	-	GO:0003824//catalytic activity	GO:0008152//metabolic process
PDE_04106	132.325	103.988	173.19	94.3759	53.6083	-1.30356	0.9222	8.41885e-08	1.90728e-06	hypothetical protein	K01739|1|7e-157|461|afv:AFLA_027050|cystathionine gamma-synthase [EC:2.5.1.48] (A)	-	GO:0030170//pyridoxal phosphate binding	-
PDE_04107	31.4748	23.7745	50.8365	21.7758	14.7192	-1.0965	0.826876	0.00227848	0.0151467	hypothetical protein	-	-	-	-
PDE_04127	77.8675	85.2721	51.5125	146.936	33.178	-1.23079	0.90212	0.00140925	0.0102957	hypothetical protein	-	GO:0016021//integral component of membrane	-	-
PDE_04128	94.5969	90.9552	62.904	310.64	35.9564	-1.39554	0.918022	0.000181074	0.00184535	hypothetical protein	-	-	-	-
PDE_04132	403.437	225.023	801.721	406.604	129.429	-1.64019	0.949066	2.64134e-13	1.6553e-11	hypothetical protein	K02929|1|1e-68|207|nfi:NFIA_083820|large subunit ribosomal protein L44e (A)	GO:0005622//intracellular;GO:0005840//ribosome;GO:0005622//intracellular;GO:0005840//ribosome	GO:0003735//structural constituent of ribosome;GO:0003735//structural constituent of ribosome	GO:0006412//translation;GO:0006412//translation
PDE_04142	182.681	160.762	220.928	255.457	88.9544	-1.03819	0.911254	0.000148319	0.00154748	hypothetical protein	K00029|1|0.0|1090|pcs:Pc13g04510|malate dehydrogenase (oxaloacetate-decarboxylating)(NADP+) [EC:1.1.1.40] (A)	-	GO:0016616//oxidoreductase activity, acting on the CH-OH group of donors, NAD or NADP as acceptor;GO:0016619;GO:0051287//NAD binding;GO:0016616//oxidoreductase activity, acting on the CH-OH group of donors, NAD or NADP as acceptor;GO:0016619;GO:0051287//NAD binding;GO:0016616//oxidoreductase activity, acting on the CH-OH group of donors, NAD or NADP as acceptor;GO:0016619;GO:0016491//oxidoreducta…	GO:0055114//oxidation-reduction process;GO:0055114//oxidation-reduction process;GO:0055114//oxidation-reduction process;GO:0055114//oxidation-reduction process;GO:0006108//malate metabolic process;GO:0055114//oxidation-reduction process;GO:0006108//malate metabolic process;GO:0055114//oxidation-reduction process;GO:0006108//malate metabolic process;GO:0055114//oxidation-reduction process;GO:00061…
PDE_04145	36.3451	28.2938	63.563	21.3278	15.9622	-1.1871	0.851169	6.14668e-05	0.000723426	hypothetical protein	K14002|1|0.0|698|pcs:Pc13g04480|DnaJ-related protein SCJ1 (A)	-	GO:0031072//heat shock protein binding;GO:0051082//unfolded protein binding;GO:0031072//heat shock protein binding;GO:0051082//unfolded protein binding	-
PDE_04150	344.904	251.342	263.278	514.063	92.6466	-1.89638	0.952968	1.8876e-08	4.89711e-07	hypothetical protein	K08141|1|0.0|737|npa:UCRNP2_7599|MFS transporter, SP family, general alpha glucoside:H+ symporter (A)	GO:0016020//membrane;GO:0016021//integral component of membrane;GO:0016020//membrane	GO:0022891//substrate-specific transmembrane transporter activity;GO:0022857//transmembrane transporter activity;GO:0005215//transporter activity	GO:0055085//transmembrane transport;GO:0055085//transmembrane transport;GO:0006810//transport;GO:0055085//transmembrane transport
PDE_04151	287.126	201.199	280.9	368.571	64.1679	-2.16176	0.954988	1.21916e-25	2.50344e-23	putative alpha-glucosidase	K01187|1|0.0|760|act:ACLA_008120|alpha-glucosidase [EC:3.2.1.20] (A);K01215|3|0.0|748|afm:AFUA_7G06380|glucan 1,6-alpha-glucosidase [EC:3.2.1.70] (A)	-	GO:0003824//catalytic activity;GO:0043169//cation binding;GO:0003824//catalytic activity;GO:0043169//cation binding	GO:0005975//carbohydrate metabolic process;GO:0005975//carbohydrate metabolic process
PDE_04184	19.3281	5.18445	11.7975	37.3076	2.48887	-2.95714	0.859042	1.19159e-11	5.89743e-10	hypothetical protein	K08197|1|0.0|887|pcs:Pc13g04290|MFS transporter, SIT family, siderophore-iron:H+ symporter (A)	GO:0016021//integral component of membrane	-	GO:0055085//transmembrane transport
PDE_04185	60.3829	50.9276	50.3413	36.8476	28.3202	-1.09231	0.877827	0.000593884	0.00501889	hypothetical protein	-	-	-	-
PDE_04216	71.0485	89.7054	32.8152	52.7469	35.2505	-1.01116	0.876791	0.00189064	0.0129962	hypothetical protein	-	-	GO:0051920//peroxiredoxin activity	GO:0055114//oxidation-reduction process
PDE_04220	82.3569	69.4986	121	104.094	41.1423	-1.00127	0.881419	0.000823731	0.00652695	hypothetical protein	K01738|1|0.0|707|aor:AOR_1_486134|cysteine synthase A [EC:2.5.1.47] (A)	-	-	GO:0006535//cysteine biosynthetic process from serine
PDE_04260	136.073	95.2874	365.99	106.716	29.6675	-2.19742	0.946442	7.23391e-18	7.42707e-16	hypothetical protein	K00505|4|6e-10|58.5|act:ACLA_052770|tyrosinase [EC:1.14.18.1] (A)	-	-	-
PDE_04315	111.513	88.2932	152.365	361.968	39.5811	-1.49433	0.925964	9.79688e-11	4.04059e-09	hypothetical protein	K04077|1|0.0|1082|ang:ANI_1_642104|chaperonin GroEL (A)	GO:0005737//cytoplasm;GO:0005737//cytoplasm;GO:0005737//cytoplasm;GO:0005737//cytoplasm;GO:0005737//cytoplasm;GO:0005737//cytoplasm;GO:0005737//cytoplasm;GO:0005737//cytoplasm	GO:0005524//ATP binding;GO:0005524//ATP binding	GO:0042026//protein refolding;GO:0044267//cellular protein metabolic process;GO:0006457//protein folding;GO:0042026//protein refolding;GO:0042026//protein refolding;GO:0042026//protein refolding;GO:0042026//protein refolding;GO:0042026//protein refolding;GO:0042026//protein refolding
PDE_04321	36.2331	38.711	10.6803	29.1159	13.1789	-1.45908	0.871284	0.0569808	0.181672	hypothetical protein	-	-	-	-
PDE_04326	26.2365	20.1074	102.622	18.8699	10.6521	-1.30044	0.828861	0.000999154	0.00771427	hypothetical protein	K01183|3|2e-06|50.1|cmt:CCM_06535|chitinase [EC:3.2.1.14] (A)	-	-	-
PDE_04366	40.8116	27.2291	69.4129	14.6752	5.83514	-2.80614	0.915225	3.18e-17	3.06902e-15	hypothetical protein	-	-	GO:0016491//oxidoreductase activity;GO:0016491//oxidoreductase activity;GO:0016491//oxidoreductase activity;GO:0016491//oxidoreductase activity;GO:0016491//oxidoreductase activity	GO:0008152//metabolic process;GO:0008152//metabolic process;GO:0008152//metabolic process;GO:0008152//metabolic process
PDE_04403	21.2368	14.5588	98.537	18.524	8.21834	-1.36965	0.810318	1.4609e-05	0.000208259	hypothetical protein	-	-	-	-
PDE_04474	20.4669	16.168	206.429	88.9952	2.518	-3.02294	0.866173	1.74538e-07	3.69401e-06	hypothetical protein	-	-	-	-
PDE_04495	451.212	202.464	1165.81	247.727	70.8124	-2.67173	0.962395	6.78866e-40	3.63986e-37	hypothetical protein	K00059|1|2e-156|439|pcs:Pc21g16430|3-oxoacyl-[acyl-carrier protein] reductase [EC:1.1.1.100] (A)	-	GO:0016491//oxidoreductase activity;GO:0016491//oxidoreductase activity;GO:0016491//oxidoreductase activity;GO:0016491//oxidoreductase activity;GO:0016491//oxidoreductase activity	GO:0008152//metabolic process;GO:0008152//metabolic process;GO:0008152//metabolic process;GO:0008152//metabolic process
PDE_04496	204.41	75.8866	457.882	75.2694	30.6443	-2.73778	0.956162	2.32812e-35	9.36195e-33	hypothetical protein	K17740|1|2e-99|287|pcs:Pc21g16420|scytalone dehydratase [EC:4.2.1.94] (A)	-	GO:0030411	GO:0006582//melanin metabolic process
PDE_04547	26.4436	21.167	38.2883	57.2815	12.1666	-1.11999	0.811181	0.000723077	0.00585438	hypothetical protein	K14820|1|0.0|586|pcs:Pc22g22040|ribosome biogenesis protein BRX1 (A)	-	-	-
PDE_04565	107.256	62.3851	155.047	75.9615	31.4426	-1.77027	0.934096	4.44559e-14	3.08664e-12	hypothetical protein	-	-	-	-
PDE_04588	72.4567	59.4208	7.61725	131.496	20.6007	-1.81442	0.923927	0.000451653	0.00398801	hypothetical protein	K00134|1|0.0|565|afv:AFLA_101470|glyceraldehyde 3-phosphate dehydrogenase [EC:1.2.1.12] (A)	-	GO:0016620//oxidoreductase activity, acting on the aldehyde or oxo group of donors, NAD or NADP as acceptor;GO:0050661//NADP binding;GO:0051287//NAD binding;GO:0016620//oxidoreductase activity, acting on the aldehyde or oxo group of donors, NAD or NADP as acceptor;GO:0016620//oxidoreductase activity, acting on the aldehyde or oxo group of donors, NAD or NADP as acceptor;GO:0016620//oxidoreductase…	GO:0006006//glucose metabolic process;GO:0055114//oxidation-reduction process;GO:0055114//oxidation-reduction process;GO:0055114//oxidation-reduction process;GO:0055114//oxidation-reduction process;GO:0055114//oxidation-reduction process;GO:0055114//oxidation-reduction process;GO:0055114//oxidation-reduction process;GO:0055114//oxidation-reduction process;GO:0055114//oxidation-reduction process
PDE_04598	19.9791	11.1279	11.1357	5.96039	7.54071	-1.40572	0.806278	0.000247869	0.00237792	hypothetical protein	-	GO:0016021//integral component of membrane	-	-
PDE_04625	30.5004	5.33152	9.1361	4.2821	3.07007	-3.31249	0.902276	1.1878e-35	5.21068e-33	hypothetical protein	-	-	-	-
PDE_04645	38.5563	25.863	35.9632	21.5946	18.0671	-1.0936	0.845816	0.000328851	0.00303127	hypothetical protein	K14713|1|0.0|668|pcs:Pc20g05560|solute carrier family 39 (zinc transporter), member 7 (A)	GO:0016020//membrane	GO:0046873//metal ion transmembrane transporter activity	GO:0030001//metal ion transport;GO:0055085//transmembrane transport
PDE_04650	49.9416	33.009	144.839	30.491	24.8976	-1.00424	0.853552	0.000820984	0.00651589	hypothetical protein	-	-	-	-
PDE_04665	13.599	6.86922	244.809	7.06328	0.723834	-4.80673	0.840689	3.87315e-08	9.48725e-07	hypothetical protein	-	-	-	-
PDE_04700	64.7009	63.2634	26.4237	57.2094	30.3025	-1.09435	0.882092	8.52645e-05	0.000964699	hypothetical protein	K00311|1|0.0|1090|ani:AN4977.2|electron-transferring-flavoprotein dehydrogenase [EC:1.5.5.1] (A)	-	GO:0051536//iron-sulfur cluster binding;GO:0004174//electron-transferring-flavoprotein dehydrogenase activity	GO:0055114//oxidation-reduction process
PDE_04708	36.6301	23.3774	17.0388	23.3014	18.304	-1.00087	0.827325	0.0138071	0.0644355	hypothetical protein	-	-	-	-
PDE_04732	84.7682	72.1847	21.7812	70.0708	37.0055	-1.19578	0.903398	1.25772e-05	0.000183081	hypothetical protein	K00059|1|0.0|532|pcs:Pc13g10320|3-oxoacyl-[acyl-carrier protein] reductase [EC:1.1.1.100] (A)	-	GO:0016491//oxidoreductase activity;GO:0016491//oxidoreductase activity;GO:0016491//oxidoreductase activity;GO:0016491//oxidoreductase activity;GO:0016491//oxidoreductase activity	GO:0008152//metabolic process;GO:0008152//metabolic process;GO:0008152//metabolic process;GO:0008152//metabolic process
PDE_04737	139.346	92.6968	195.343	100.321	69.5589	-1.00237	0.89903	0.000635777	0.00529412	putative dolichyl-phosphate beta-D-mannosyltransferase	K00721|1|1e-168|468|pcs:Pc13g10270|dolichol-phosphate mannosyltransferase [EC:2.4.1.83] (A)	-	-	-
PDE_04754	43.0521	24.7858	39.475	36.9955	17.65	-1.28641	0.87358	4.47111e-05	0.000551799	hypothetical protein	K17421|1|9e-107|307|pcs:Pc13g10070|large subunit ribosomal protein L40, mitochondrial (A)	-	-	-
PDE_04823	41.5253	38.1879	73.6273	23.5951	17.8146	-1.22093	0.865085	1.16321e-05	0.00017087	hypothetical protein	K01641|1|0.0|844|pcs:Pc18g01450|hydroxymethylglutaryl-CoA synthase [EC:2.3.3.10] (A)	-	GO:0004421//hydroxymethylglutaryl-CoA synthase activity;GO:0004421//hydroxymethylglutaryl-CoA synthase activity;GO:0004421//hydroxymethylglutaryl-CoA synthase activity;GO:0004421//hydroxymethylglutaryl-CoA synthase activity	GO:0008299//isoprenoid biosynthetic process;GO:0008299//isoprenoid biosynthetic process;GO:0008299//isoprenoid biosynthetic process;GO:0008299//isoprenoid biosynthetic process
PDE_04825	237.172	150.22	513.001	255.345	84.1014	-1.49573	0.938965	1.23986e-09	4.05622e-08	hypothetical protein	K02891|1|1e-75|223|ure:UREG_04581|large subunit ribosomal protein L22e (A)	GO:0005622//intracellular;GO:0005840//ribosome	GO:0003735//structural constituent of ribosome	GO:0006412//translation
PDE_04839	27.3028	19.4834	24.0604	14.3697	13.1241	-1.05683	0.805674	0.000200349	0.00199735	hypothetical protein	-	GO:0005622//intracellular;GO:0005622//intracellular;GO:0005622//intracellular;GO:0005622//intracellular;GO:0005622//intracellular;GO:0005622//intracellular	GO:0005085//guanyl-nucleotide exchange factor activity;GO:0005085//guanyl-nucleotide exchange factor activity;GO:0005085//guanyl-nucleotide exchange factor activity;GO:0005085//guanyl-nucleotide exchange factor activity;GO:0005085//guanyl-nucleotide exchange factor activity;GO:0005085//guanyl-nucleotide exchange factor activity	GO:0007264//small GTPase mediated signal transduction;GO:0051056//regulation of small GTPase mediated signal transduction;GO:0007264//small GTPase mediated signal transduction;GO:0051056//regulation of small GTPase mediated signal transduction;GO:0051056//regulation of small GTPase mediated signal transduction;GO:0007264//small GTPase mediated signal transduction
PDE_04850	143.825	87.8985	103.917	79.1003	63.4442	-1.18075	0.916537	2.57749e-05	0.000340293	hypothetical protein	-	-	-	-
PDE_04897	1092.86	704.627	1989.07	1259.08	513.631	-1.0893	0.930436	2.25724e-05	0.000305963	hypothetical protein	K02977|1|7e-111|315|pcs:Pc13g09510|small subunit ribosomal protein S27Ae (A)	GO:0005622//intracellular;GO:0005840//ribosome	GO:0005515//protein binding;GO:0003735//structural constituent of ribosome;GO:0005515//protein binding	GO:0006412//translation
PDE_04903	99.9947	96.1851	73.3022	207.853	49.8816	-1.00334	0.889067	0.000534069	0.00459385	hypothetical protein	K09051|1|0.0|667|nfi:NFIA_065970|ATF/CREB family transcription factor (A)	GO:0005634//nucleus;GO:0005634//nucleus;GO:0005634//nucleus	GO:0003700//sequence-specific DNA binding transcription factor activity;GO:0043565//sequence-specific DNA binding;GO:0003700//sequence-specific DNA binding transcription factor activity;GO:0043565//sequence-specific DNA binding;GO:0003700//sequence-specific DNA binding transcription factor activity;GO:0003700//sequence-specific DNA binding transcription factor activity;GO:0003700//sequence-specif…	GO:0006355//regulation of transcription, DNA-templated;GO:0006355//regulation of transcription, DNA-templated;GO:0006355//regulation of transcription, DNA-templated;GO:0006355//regulation of transcription, DNA-templated;GO:0006355//regulation of transcription, DNA-templated;GO:0006355//regulation of transcription, DNA-templated
PDE_04915	68.0557	51.9933	67.8753	54.0119	21.0621	-1.69207	0.918419	0.00422058	0.0253313	putative cutinase	K08095|2|4e-86|271|afm:AFUA_2G14420|cutinase [EC:3.1.1.74] (A)	GO:0005576//extracellular region	GO:0050525//cutinase activity;GO:0016787//hydrolase activity	GO:0008152//metabolic process
PDE_04921	274.35	98.7665	704.133	143.952	28.2638	-3.27899	0.961963	4.09189e-58	4.38787e-55	hypothetical protein	-	-	-	-
PDE_04949	345.971	184.003	292.394	160.195	121.568	-1.50889	0.942747	1.87059e-11	8.93714e-10	hypothetical protein	-	-	-	-
PDE_04970	56.5282	39.6329	90.2633	131.725	25.3275	-1.15826	0.880175	2.48325e-05	0.000330563	hypothetical protein	K14564|1|0.0|870|nfi:NFIA_067690|nucleolar protein 56 (A)	-	-	-
PDE_04989	15.8532	9.05805	31.0309	8.58388	3.81088	-2.05658	0.814393	2.54546e-12	1.38793e-10	hypothetical protein	-	GO:0016021//integral component of membrane;GO:0016020//membrane	GO:0015171//amino acid transmembrane transporter activity	GO:0006865//amino acid transport;GO:0055085//transmembrane transport;GO:0003333//amino acid transmembrane transport
PDE_05035	168.649	92.2717	299.516	180.925	65.8549	-1.35666	0.929659	2.03109e-08	5.2133e-07	hypothetical protein	K13199|1|4e-123|359|pcs:Pc18g00860|plasminogen activator inhibitor 1 RNA-binding protein (A)	-	-	-
PDE_05039	177.477	133.001	91.8125	101.372	87.5227	-1.01991	0.906575	0.000542506	0.00464984	hypothetical protein	-	-	GO:0003824//catalytic activity	GO:0008152//metabolic process
PDE_05064	31.7262	34.2958	24.7605	21.7556	14.0494	-1.17517	0.836666	5.18911e-05	0.000626774	hypothetical protein	-	-	-	-
PDE_05092	122.187	68.4616	75.6789	12.3415	12.5423	-3.28422	0.952778	3.16274e-47	2.18026e-44	hypothetical protein	-	-	-	-
PDE_05108	202.331	107.874	414.747	209.273	70.376	-1.52356	0.938137	2.94838e-11	1.36148e-09	hypothetical protein	K02998|2|0.0|535|pcs:Pc13g14510|small subunit ribosomal protein SAe (A)	GO:0005622//intracellular;GO:0005840//ribosome;GO:0005622//intracellular;GO:0005840//ribosome;GO:0005622//intracellular;GO:0005840//ribosome;GO:0005622//intracellular;GO:0005840//ribosome;GO:0005622//intracellular;GO:0005840//ribosome;GO:0005622//intracellular;GO:0005840//ribosome;GO:0015935//small ribosomal subunit;GO:0005622//intracellular;GO:0005840//ribosome;GO:0005622//intracellular;GO:00058…	GO:0003735//structural constituent of ribosome;GO:0003735//structural constituent of ribosome;GO:0003735//structural constituent of ribosome;GO:0003735//structural constituent of ribosome;GO:0003735//structural constituent of ribosome;GO:0003735//structural constituent of ribosome;GO:0003735//structural constituent of ribosome;GO:0003735//structural constituent of ribosome;GO:0003735//structural …	GO:0006412//translation;GO:0006412//translation;GO:0006412//translation;GO:0006412//translation;GO:0006412//translation;GO:0006412//translation;GO:0006412//translation;GO:0006412//translation;GO:0006412//translation;GO:0006412//translation;GO:0006412//translation
PDE_05114	35.1542	25.272	58.82	94.079	16.7541	-1.06918	0.835733	0.000300268	0.00280163	hypothetical protein	K14565|1|0.0|828|act:ACLA_041100|nucleolar protein 58 (A)	-	-	-
PDE_05118	1765.08	3427.01	765.428	1741.17	805.866	-1.13112	0.934891	0.0414639	0.143945	hypothetical protein	-	GO:0016020//membrane;GO:0016020//membrane;GO:0016020//membrane;GO:0016020//membrane;GO:0016020//membrane;GO:0016020//membrane;GO:0016020//membrane	-	-
PDE_05136	37.3982	24.6019	26.9779	70.7089	10.5458	-1.8263	0.890932	4.9923e-12	2.60436e-10	hypothetical protein	-	-	-	-
PDE_05144	381.743	209.405	722.772	406.223	135.693	-1.49225	0.94323	1.23335e-10	4.91863e-09	hypothetical protein	K02993|1|2e-136|383|pcs:Pc18g00610|small subunit ribosomal protein S7e (A)	GO:0005622//intracellular;GO:0005840//ribosome;GO:0005622//intracellular;GO:0005840//ribosome	GO:0003735//structural constituent of ribosome;GO:0003735//structural constituent of ribosome	GO:0006412//translation;GO:0006412//translation
PDE_05177	119.088	74.0215	107.893	50.9196	50.2419	-1.24506	0.917107	4.63533e-06	7.35782e-05	hypothetical protein	K07941|1|1e-130|367|pcs:Pc18g00280|ADP-ribosylation factor 6 (A)	GO:0005622//intracellular;GO:0005622//intracellular;GO:0005622//intracellular	GO:0005525//GTP binding;GO:0005525//GTP binding;GO:0005525//GTP binding;GO:0005525//GTP binding;GO:0005525//GTP binding;GO:0005525//GTP binding;GO:0005525//GTP binding;GO:0005525//GTP binding;GO:0005525//GTP binding	GO:0007264//small GTPase mediated signal transduction;GO:0006886//intracellular protein transport;GO:0007264//small GTPase mediated signal transduction;GO:0015031//protein transport;GO:0007264//small GTPase mediated signal transduction
PDE_05183	50.0247	33.2498	110.553	92.1528	19.8935	-1.33035	0.8857	8.90847e-07	1.67268e-05	hypothetical protein	K05824|1|0.0|658|ang:ANI_1_398134|homoisocitrate dehydrogenase [EC:1.1.1.87] (A)	-	GO:0016616//oxidoreductase activity, acting on the CH-OH group of donors, NAD or NADP as acceptor;GO:0000287//magnesium ion binding;GO:0016616//oxidoreductase activity, acting on the CH-OH group of donors, NAD or NADP as acceptor;GO:0051287//NAD binding	GO:0055114//oxidation-reduction process;GO:0055114//oxidation-reduction process
PDE_05203	427.344	229.901	897.456	529.692	166.102	-1.36333	0.940105	1.13365e-08	3.06466e-07	hypothetical protein	K02949|1|9e-113|320|nfi:NFIA_080930|small subunit ribosomal protein S11e (A)	GO:0005622//intracellular;GO:0005840//ribosome;GO:0005622//intracellular;GO:0005840//ribosome;GO:0005622//intracellular;GO:0005840//ribosome;GO:0005622//intracellular;GO:0005840//ribosome;GO:0005622//intracellular;GO:0005840//ribosome;GO:0005622//intracellular;GO:0005840//ribosome	GO:0003735//structural constituent of ribosome;GO:0003735//structural constituent of ribosome;GO:0003735//structural constituent of ribosome;GO:0003735//structural constituent of ribosome;GO:0003735//structural constituent of ribosome;GO:0003735//structural constituent of ribosome	GO:0006412//translation;GO:0006412//translation;GO:0006412//translation;GO:0006412//translation;GO:0006412//translation;GO:0006412//translation
PDE_05238	45.1159	42.9765	28.6213	31.0303	20.5028	-1.13781	0.864256	0.000193105	0.00193727	hypothetical protein	K10669|3|2e-139|402|nfi:NFIA_035260|2'-phosphotransferase [EC:2.7.1.160] (A)	-	GO:0016772//transferase activity, transferring phosphorus-containing groups	GO:0006388//tRNA splicing, via endonucleolytic cleavage and ligation
PDE_05239	109.984	316.646	94.9662	33.2146	45.0965	-1.28621	0.917314	0.288216	0.537397	hypothetical protein	K03381|1|0.0|506|afm:AFUA_2G02910|catechol 1,2-dioxygenase [EC:1.13.11.1] (A)	-	GO:0003824//catalytic activity;GO:0008199//ferric iron binding;GO:0005506//iron ion binding;GO:0018576//catechol 1,2-dioxygenase activity	GO:0006725//cellular aromatic compound metabolic process;GO:0055114//oxidation-reduction process;GO:0009712//catechol-containing compound metabolic process;GO:0055114//oxidation-reduction process
PDE_05240	109.806	246.387	86.9545	47.3645	46.7767	-1.2311	0.913637	0.125256	0.31505	hypothetical protein	-	-	-	-
PDE_05253	301.184	178.624	618.741	307.389	101.99	-1.56222	0.943783	3.75827e-11	1.67148e-09	hypothetical protein	K02915|1|1e-78|231|ang:ANI_1_920064|large subunit ribosomal protein L34e (A)	GO:0005622//intracellular;GO:0005840//ribosome;GO:0005622//intracellular;GO:0005840//ribosome;GO:0005622//intracellular;GO:0005840//ribosome;GO:0005622//intracellular;GO:0005840//ribosome;GO:0005622//intracellular;GO:0005840//ribosome	GO:0003735//structural constituent of ribosome;GO:0003735//structural constituent of ribosome;GO:0003735//structural constituent of ribosome;GO:0003735//structural constituent of ribosome;GO:0003735//structural constituent of ribosome	GO:0006412//translation;GO:0006412//translation;GO:0006412//translation;GO:0006412//translation;GO:0006412//translation
PDE_05278	817.884	644.464	436.955	552.538	397.848	-1.03968	0.92536	0.000167176	0.00172373	hypothetical protein	-	GO:0005739//mitochondrion	GO:0004857//enzyme inhibitor activity	GO:0045980//negative regulation of nucleotide metabolic process
PDE_05292	263.629	144.135	557.995	291.413	82.1017	-1.68303	0.946165	4.35806e-13	2.6124e-11	hypothetical protein	K02894|1|4e-92|266|pcs:Pc18g03860|large subunit ribosomal protein L23e (A)	GO:0005840//ribosome	GO:0003735//structural constituent of ribosome	GO:0006412//translation
PDE_05315	671.55	400.33	1387.06	585.512	185.446	-1.8565	0.956542	3.96013e-17	3.74698e-15	hypothetical protein	K02971|1|2e-58|177|ani:AN3823.2|small subunit ribosomal protein S21e (A)	GO:0005622//intracellular;GO:0005840//ribosome;GO:0005622//intracellular;GO:0005840//ribosome	GO:0003735//structural constituent of ribosome;GO:0003735//structural constituent of ribosome	GO:0006412//translation;GO:0006412//translation
PDE_05338	154.465	77.5353	76.4732	38.1877	49.4955	-1.64191	0.938465	6.24527e-09	1.75213e-07	hypothetical protein	-	-	-	-
PDE_05339	238.84	186.954	315.86	123.735	96.3147	-1.31022	0.932301	5.46088e-08	1.28231e-06	hypothetical protein	-	-	-	-
PDE_05340	24.9813	11.6065	12.3529	5.67946	6.45868	-1.95154	0.861977	2.2016e-11	1.03144e-09	hypothetical protein	-	-	-	-
PDE_05355	24.8113	12.1424	39.8772	29.2211	5.75526	-2.10805	0.866553	4.69056e-05	0.000575937	hypothetical protein	-	-	-	-
PDE_05356	23.9832	13.4952	41.9232	30.9229	9.12426	-1.39425	0.827066	0.0017987	0.0124977	hypothetical protein	-	-	-	-
PDE_05375	38.9677	34.6093	51.5613	109.474	14.2945	-1.44682	0.87636	0.00144855	0.0105509	hypothetical protein	K02896|1|2e-120|342|pcs:Pc18g05370|large subunit ribosomal protein L24e (A)	-	-	-
PDE_05404	190.775	83.7561	199.414	61.6674	58.8716	-1.69623	0.942816	1.95377e-08	5.05518e-07	hypothetical protein	K13621|2|2e-08|54.7|aor:AOR_1_1016014|betaine lipid synthase (A)	-	-	-
PDE_05414	24.3678	30.9558	65.2312	98.27	9.63742	-1.33826	0.823595	8.3311e-05	0.000948154	hypothetical protein	-	-	-	-
PDE_05452	51.2757	43.0059	23.5186	15.9847	21.8761	-1.22892	0.880262	0.000285341	0.00269455	hypothetical protein	-	-	-	-
PDE_05463	18.4879	9.43967	11.2297	3.66863	5.73745	-1.6881	0.816257	1.69193e-05	0.000238376	hypothetical protein	-	-	-	-
PDE_05524	21.1246	10.5915	96.1481	11.7459	5.25305	-2.0077	0.846611	1.94055e-12	1.0641e-10	hypothetical protein	-	-	-	-
PDE_05527	204.679	64.2266	441.125	128.695	36.814	-2.47504	0.95428	1.15175e-33	3.96983e-31	putative glucoamylase	K01178|1|0.0|785|nfi:NFIA_001210|glucoamylase [EC:3.2.1.3] (A)	-	GO:0004339//glucan 1,4-alpha-glucosidase activity;GO:0004339//glucan 1,4-alpha-glucosidase activity;GO:0004339//glucan 1,4-alpha-glucosidase activity;GO:0004339//glucan 1,4-alpha-glucosidase activity;GO:0004339//glucan 1,4-alpha-glucosidase activity;GO:0004339//glucan 1,4-alpha-glucosidase activity;GO:0004339//glucan 1,4-alpha-glucosidase activity;GO:0004553//hydrolase activity, hydrolyzing O-gly…	GO:0005976//polysaccharide metabolic process;GO:0005976//polysaccharide metabolic process;GO:0005976//polysaccharide metabolic process;GO:0005976//polysaccharide metabolic process;GO:0005976//polysaccharide metabolic process;GO:0005976//polysaccharide metabolic process;GO:0005976//polysaccharide metabolic process;GO:0005976//polysaccharide metabolic process;GO:0005976//polysaccharide metabolic pr…
PDE_05534	433.251	193.359	114.161	182.261	195.052	-1.15134	0.929245	0.000134688	0.00143414	hypothetical protein	K03305|2|0.0|704|gtr:GLOTRDRAFT_66024|proton-dependent oligopeptide transporter, POT family (A)	GO:0016020//membrane;GO:0016020//membrane	GO:0005215//transporter activity;GO:0005215//transporter activity	GO:0006810//transport;GO:0006857//oligopeptide transport
PDE_05549	36.8251	27.4216	26.1803	28.2172	14.5346	-1.3412	0.864515	1.05485e-06	1.95776e-05	hypothetical protein	-	GO:0000785//chromatin;GO:0005634//nucleus;GO:0000785//chromatin;GO:0005634//nucleus;GO:0000785//chromatin;GO:0005634//nucleus	GO:0003677//DNA binding;GO:0003677//DNA binding;GO:0003677//DNA binding;GO:0003677//DNA binding;GO:0003677//DNA binding;GO:0003677//DNA binding;GO:0003677//DNA binding;GO:0003677//DNA binding;GO:0003677//DNA binding;GO:0003677//DNA binding;GO:0003677//DNA binding;GO:0003677//DNA binding;GO:0003677//DNA binding;GO:0003677//DNA binding;GO:0003677//DNA binding	GO:0006355//regulation of transcription, DNA-templated;GO:0006355//regulation of transcription, DNA-templated;GO:0006355//regulation of transcription, DNA-templated;GO:0006355//regulation of transcription, DNA-templated
PDE_05550	353.778	233.632	657.523	249.362	163.967	-1.10944	0.924341	0.058311	0.18433	hypothetical protein	-	-	GO:0016209//antioxidant activity;GO:0016491//oxidoreductase activity;GO:0051920//peroxiredoxin activity	GO:0055114//oxidation-reduction process;GO:0055114//oxidation-reduction process
PDE_05554	37.3533	20.0167	76.5942	20.9996	15.961	-1.22668	0.857177	5.21974e-05	0.000628126	hypothetical protein	K12667|1|2e-144|411|pcs:Pc18g02820|oligosaccharyltransferase complex subunit delta (ribophorin II) (A)	GO:0005789//endoplasmic reticulum membrane;GO:0008250//oligosaccharyltransferase complex	GO:0004579//dolichyl-diphosphooligosaccharide-protein glycotransferase activity	GO:0018279//protein N-linked glycosylation via asparagine
PDE_05572	208.712	150.408	78.256	63.8485	103.79	-1.00784	0.908526	0.000354755	0.00322386	hypothetical protein	-	-	-	-
PDE_05573	51.0226	38.3445	15.6882	30.7305	22.043	-1.21081	0.878552	1.08885e-05	0.000160435	hypothetical protein	K01809|1|0.0|640|pcs:Pc13g08170|mannose-6-phosphate isomerase [EC:5.3.1.8] (A)	-	GO:0004476//mannose-6-phosphate isomerase activity;GO:0008270//zinc ion binding;GO:0004476//mannose-6-phosphate isomerase activity;GO:0004476//mannose-6-phosphate isomerase activity;GO:0004476//mannose-6-phosphate isomerase activity;GO:0004476//mannose-6-phosphate isomerase activity;GO:0004476//mannose-6-phosphate isomerase activity;GO:0004476//mannose-6-phosphate isomerase activity;GO:0004476//m…	GO:0005975//carbohydrate metabolic process;GO:0009298//GDP-mannose biosynthetic process;GO:0009298//GDP-mannose biosynthetic process;GO:0009298//GDP-mannose biosynthetic process;GO:0009298//GDP-mannose biosynthetic process;GO:0009298//GDP-mannose biosynthetic process;GO:0009298//GDP-mannose biosynthetic process;GO:0005975//carbohydrate metabolic process
PDE_05576	114.991	76.6713	48.9802	29.0363	51.6111	-1.15577	0.90989	0.000808382	0.00642644	hypothetical protein	-	-	-	-
PDE_05592	60.8092	31.3543	20.7454	9.45074	25.14	-1.27431	0.893228	1.82012e-07	3.82701e-06	hypothetical protein	-	-	GO:0003676//nucleic acid binding;GO:0005524//ATP binding;GO:0008026//ATP-dependent helicase activity;GO:0003676//nucleic acid binding;GO:0004386//helicase activity;GO:0005524//ATP binding;GO:0003676//nucleic acid binding;GO:0004386//helicase activity;GO:0005524//ATP binding;GO:0003676//nucleic acid binding;GO:0004386//helicase activity;GO:0005524//ATP binding	-
PDE_05623	26.7946	20.0338	16.005	13.0314	12.787	-1.06726	0.80614	0.037741	0.134853	hypothetical protein	-	-	-	-
PDE_05635	453.099	242.071	843.319	465.887	154.875	-1.54872	0.947029	8.64533e-11	3.62765e-09	hypothetical protein	K02923|1|2e-42|135|afv:AFLA_111980|large subunit ribosomal protein L38e (A)	GO:0005622//intracellular;GO:0005840//ribosome	GO:0003735//structural constituent of ribosome	GO:0006412//translation
PDE_05640	30.2379	115.809	4.63531	43.5358	10.6694	-1.50287	0.857678	0.00565867	0.0319554	hypothetical protein	K17989|1|0.0|617|pcs:Pc13g07300|L-serine/L-threonine ammonia-lyase [EC:4.3.1.17 4.3.1.19] (A)	-	GO:0030170//pyridoxal phosphate binding	GO:0006520//cellular amino acid metabolic process
PDE_05649	399.533	219.036	832.932	533.109	153.462	-1.38043	0.939967	6.57198e-09	1.83313e-07	hypothetical protein	K02868|1|3e-122|345|afm:AFUA_4G07730|large subunit ribosomal protein L11e (A)	GO:0005840//ribosome;GO:0005840//ribosome;GO:0005622//intracellular;GO:0005840//ribosome	GO:0003735//structural constituent of ribosome;GO:0003735//structural constituent of ribosome;GO:0003735//structural constituent of ribosome	GO:0006412//translation;GO:0006412//translation;GO:0006412//translation
PDE_05653	706.244	569.115	354.765	869.735	228.911	-1.62538	0.952485	3.61889e-05	0.000457145	hypothetical protein	-	GO:0016021//integral component of membrane	-	GO:0055085//transmembrane transport
PDE_05654	17.8523	15.7212	11.6923	10.8429	5.68587	-1.65066	0.810163	0.000140611	0.0014831	hypothetical protein	-	-	GO:0008757//S-adenosylmethionine-dependent methyltransferase activity	-
PDE_05678	304.548	167.974	651.262	435.425	123.028	-1.30768	0.93477	6.39133e-08	1.48633e-06	hypothetical protein	K02937|1|1e-154|436|afm:AFUA_4G03880|large subunit ribosomal protein L7e (A)	-	-	-
PDE_05730	36.44	25.4365	66.4078	51.5675	15.5084	-1.23247	0.855105	0.000152193	0.00158449	hypothetical protein	K07101|1|2e-134|379|afv:AFLA_115200|(A)	-	-	GO:0009116//nucleoside metabolic process
PDE_05733	141.609	197.686	15.5612	57.4008	29.3937	-2.26834	0.947806	9.08618e-11	3.77977e-09	hypothetical protein	K00074|1|0.0|565|nfi:NFIA_028960|3-hydroxybutyryl-CoA dehydrogenase [EC:1.1.1.157] (A)	-	GO:0003857//3-hydroxyacyl-CoA dehydrogenase activity;GO:0016491//oxidoreductase activity;GO:0003857//3-hydroxyacyl-CoA dehydrogenase activity;GO:0016491//oxidoreductase activity;GO:0003857//3-hydroxyacyl-CoA dehydrogenase activity;GO:0016491//oxidoreductase activity	GO:0006631//fatty acid metabolic process;GO:0055114//oxidation-reduction process;GO:0006631//fatty acid metabolic process;GO:0055114//oxidation-reduction process;GO:0006631//fatty acid metabolic process;GO:0055114//oxidation-reduction process
PDE_05757	87.4285	74.9615	35.6395	48.8611	40.0047	-1.12793	0.899427	2.85433e-05	0.000371255	hypothetical protein	-	GO:0016021//integral component of membrane	-	GO:0055085//transmembrane transport
PDE_05774	226.892	136.356	405.523	286.653	95.8701	-1.24285	0.928174	6.70699e-07	1.292e-05	hypothetical protein	K02873|1|2e-125|357|pcs:Pc13g06740|large subunit ribosomal protein L13e (A)	GO:0005622//intracellular;GO:0005840//ribosome;GO:0005622//intracellular;GO:0005840//ribosome	GO:0003735//structural constituent of ribosome;GO:0003735//structural constituent of ribosome	GO:0006412//translation;GO:0006412//translation
PDE_05793	81.1435	61.1444	58.0612	53.6203	37.9575	-1.09609	0.893246	0.000208694	0.00206999	hypothetical protein	-	-	-	-
PDE_05808	112.983	67.2434	108.703	113.569	54.3076	-1.05688	0.900618	0.000334516	0.00306592	hypothetical protein	K07750|1|8e-163|457|pcs:Pc13g05570|methylsterol monooxygenase [EC:1.14.13.72] (A)	-	GO:0005506//iron ion binding;GO:0016491//oxidoreductase activity	GO:0006633//fatty acid biosynthetic process;GO:0055114//oxidation-reduction process
PDE_05871	372.804	254.06	686.885	475.386	185.899	-1.0039	0.913464	0.000476547	0.00417726	hypothetical protein	K02974|1|6e-90|260|pcs:Pc21g12010|small subunit ribosomal protein S24e (A)	GO:0005622//intracellular;GO:0005840//ribosome	GO:0003735//structural constituent of ribosome	GO:0006412//translation
PDE_05948	210.201	141.973	304.548	81.4556	60.5772	-1.79492	0.946165	2.84632e-10	1.06061e-08	hypothetical protein	-	-	-	-
PDE_05949	917.046	554.105	1302.15	464.155	302.562	-1.59976	0.952536	1.8764e-13	1.22359e-11	hypothetical protein	-	-	-	-
PDE_05979	41.5115	26.0782	25.1996	12.2394	15.0687	-1.46196	0.881643	1.50639e-06	2.68728e-05	hypothetical protein	-	-	-	-
PDE_05982	84.0239	52.389	71.5545	53.5813	30.1763	-1.47739	0.916952	7.23664e-08	1.66288e-06	hypothetical protein	K13348|1|1e-103|298|pcs:Pc21g13610|protein Mpv17 (A)	GO:0016021//integral component of membrane	-	-
PDE_05983	284.482	155.888	612.226	325.243	109.103	-1.38265	0.936997	3.38033e-09	1.01576e-07	hypothetical protein	K02981|1|7e-160|447|afv:AFLA_117990|small subunit ribosomal protein S2e (A)	GO:0005840//ribosome;GO:0005840//ribosome;GO:0005840//ribosome;GO:0015935//small ribosomal subunit	GO:0003723//RNA binding;GO:0003735//structural constituent of ribosome;GO:0003735//structural constituent of ribosome;GO:0003723//RNA binding;GO:0003735//structural constituent of ribosome;GO:0003735//structural constituent of ribosome	GO:0006412//translation;GO:0006412//translation;GO:0006412//translation;GO:0006412//translation
PDE_06013	86.9897	57.5305	94.1081	70.475	39.4639	-1.14031	0.899824	2.43368e-05	0.000325311	hypothetical protein	K00801|1|0.0|800|pcs:Pc21g13930|farnesyl-diphosphate farnesyltransferase [EC:2.5.1.21] (A)	GO:0016021//integral component of membrane	GO:0016740//transferase activity;GO:0016765//transferase activity, transferring alkyl or aryl (other than methyl) groups;GO:0016765//transferase activity, transferring alkyl or aryl (other than methyl) groups;GO:0004310//farnesyl-diphosphate farnesyltransferase activity	GO:0009058//biosynthetic process;GO:0008610//lipid biosynthetic process
PDE_06017	27.19	28.2585	13.2042	18.997	11.6397	-1.22403	0.825391	0.00107858	0.00822228	hypothetical protein	-	-	GO:0016491//oxidoreductase activity	GO:0055114//oxidation-reduction process
PDE_06018	84.4628	112.456	37.1998	96.1934	41.4178	-1.02807	0.887306	0.0154256	0.0700249	hypothetical protein	K16261|1|0.0|945|pcs:Pc21g14020|yeast amino acid transporter (A)	GO:0016020//membrane;GO:0016021//integral component of membrane	-	GO:0006810//transport;GO:0055085//transmembrane transport;GO:0006865//amino acid transport;GO:0055085//transmembrane transport
PDE_06059	45.104	16.7488	17.3099	18.8421	20.1782	-1.16046	0.865862	0.00962946	0.0484238	hypothetical protein	-	-	GO:0003824//catalytic activity	GO:0008152//metabolic process
PDE_06069	143.978	108.92	133.469	128.635	41.3052	-1.80145	0.940865	4.0083e-16	3.48506e-14	hypothetical protein	-	-	GO:0016491//oxidoreductase activity;GO:0016491//oxidoreductase activity;GO:0016491//oxidoreductase activity	GO:0008152//metabolic process;GO:0008152//metabolic process;GO:0008152//metabolic process
PDE_06070	30.3474	20.949	39.6275	12.7915	6.18269	-2.29527	0.888428	4.65844e-10	1.67132e-08	hypothetical protein	-	-	-	-
PDE_06071	37.2671	24.6785	45.6018	20.6616	9.50836	-1.97063	0.894903	3.04819e-15	2.37243e-13	hypothetical protein	-	GO:0016021//integral component of membrane	-	GO:0055085//transmembrane transport
PDE_06187	20.2167	7.1827	8.44674	6.85902	4.77766	-2.08117	0.844314	2.69661e-14	1.94216e-12	hypothetical protein	-	-	-	-
PDE_06231	54.3581	36.3804	74.6162	35.9452	25.3765	-1.099	0.872078	0.000239099	0.00230754	hypothetical protein	K12669|1|0.0|531|pcs:Pc21g11410|oligosaccharyltransferase complex subunit gamma (A)	-	-	-
PDE_06253	43.4156	35.6424	133.321	38.999	20.5008	-1.08253	0.854691	0.0178403	0.0778375	hypothetical protein	-	-	-	-
PDE_06264	32.2881	23.9303	37.8305	45.362	14.7839	-1.12697	0.834041	0.00139087	0.0102	hypothetical protein	-	-	-	-
PDE_06265	51.3685	31.9064	56.704	34.0221	21.2663	-1.27231	0.883214	1.17955e-06	2.15695e-05	hypothetical protein	K05917|1|0.0|901|pcs:Pc20g09070|sterol 14-demethylase [EC:1.14.13.70] (A)	-	-	-
PDE_06281	94.8416	53.8075	23.4349	14.6791	33.4959	-1.50154	0.921631	5.11825e-06	8.00968e-05	hypothetical protein	K06911|1|0.0|551|aor:AOR_1_576144|(A)	-	-	-
PDE_06289	25.5664	27.2153	10.7651	16.7906	9.93316	-1.36393	0.831503	0.0161514	0.0725011	hypothetical protein	K04082|1|4e-120|348|pcs:Pc20g09290|molecular chaperone HscB (A)	-	-	-
PDE_06325	239.687	149.585	256.692	106.771	93.4075	-1.35954	0.934684	1.97145e-08	5.0873e-07	hypothetical protein	-	-	-	-
PDE_06329	27.6199	7.60159	17.9018	2.41824	12.4442	-1.15023	0.819365	0.00054634	0.00467855	hypothetical protein	-	-	-	-
PDE_06333	122.832	65.8682	237.361	271.565	56.0533	-1.13182	0.910166	7.63513e-05	0.00088142	hypothetical protein	-	-	-	-
PDE_06368	25.239	21.9303	12.4497	12.2699	8.79433	-1.52101	0.841207	4.5873e-07	9.09077e-06	hypothetical protein	-	-	-	-
PDE_06400	110.141	79.0359	122.798	74.4112	40.6907	-1.43658	0.923806	0.000501326	0.00437067	putative beta-N-acetylhexosaminidase	K01567|2|4e-149|427|afm:AFUA_4G13770|[EC:3.-.-.-] (A)	-	-	-
PDE_06429	36.4762	22.1574	19.6499	22.5967	17.5099	-1.05878	0.836717	0.000274478	0.00260727	hypothetical protein	K10798|1|0.0|768|pcs:Pc12g02720|poly [ADP-ribose] polymerase [EC:2.4.2.30] (A)	-	-	-
PDE_06534	55.7382	39.3706	54.3645	53.65	22.0233	-1.33963	0.892814	5.5919e-07	1.09246e-05	hypothetical protein	K07748|1|0.0|706|pcs:Pc12g00300|sterol-4alpha-carboxylate 3-dehydrogenase (decarboxylating) [EC:1.1.1.170] (A)	-	-	-
PDE_06556	23.6908	17.9784	18.1975	20.0075	9.66986	-1.29276	0.816655	5.64945e-05	0.000672291	hypothetical protein	-	-	-	-
PDE_06571	206.16	64.8069	613.207	69.7778	39.1682	-2.39601	0.953797	1.33831e-25	2.69083e-23	hypothetical protein	-	-	-	-
PDE_06605	4143.42	3107.85	3325.66	1407.06	2029.86	-1.02945	0.927207	0.540792	0.768997	hypothetical protein	-	-	-	-
PDE_06607	2734.36	1421.86	1615.03	739.323	1041.97	-1.39189	0.948738	0.37451	0.627391	hypothetical protein	-	-	-	-
PDE_06610	436.036	297.66	108.588	354.099	178.74	-1.28658	0.937446	1.86954e-07	3.92237e-06	hypothetical protein	-	-	-	-
PDE_06685	184.385	95.1237	144.673	152.374	90.2195	-1.03121	0.909372	0.00356711	0.022068	hypothetical protein	-	-	-	-
PDE_06703	354.026	200.379	676.695	436.885	135.749	-1.38292	0.939052	5.09694e-09	1.45105e-07	hypothetical protein	K02991|1|1e-153|430|afv:AFLA_026830|small subunit ribosomal protein S6e (A)	GO:0005622//intracellular;GO:0005840//ribosome;GO:0005622//intracellular;GO:0005840//ribosome	GO:0003735//structural constituent of ribosome;GO:0003735//structural constituent of ribosome	GO:0006412//translation;GO:0006412//translation
PDE_06755	620.043	365.259	1212.33	790.28	250.624	-1.30685	0.940485	4.49983e-08	1.08299e-06	hypothetical protein	K02973|1|9e-36|125|pcs:Pc16g02610|small subunit ribosomal protein S23e (A)	GO:0005622//intracellular;GO:0005840//ribosome	GO:0003735//structural constituent of ribosome	GO:0006412//translation
PDE_06758	47.8189	39.2828	49.4904	58.7756	21.5623	-1.14907	0.868918	0.000138499	0.00146724	hypothetical protein	-	GO:0005622//intracellular;GO:0005840//ribosome;GO:0005622//intracellular;GO:0005840//ribosome;GO:0005622//intracellular;GO:0005840//ribosome	GO:0003735//structural constituent of ribosome;GO:0003735//structural constituent of ribosome;GO:0003735//structural constituent of ribosome	GO:0006412//translation;GO:0006412//translation;GO:0006412//translation
PDE_06792	313.338	168.208	611.966	360.214	122.035	-1.36043	0.937515	1.32575e-08	3.53448e-07	hypothetical protein	K02940|1|1e-128|363|afv:AFLA_088370|large subunit ribosomal protein L9e (A)	GO:0005622//intracellular;GO:0005840//ribosome;GO:0005840//ribosome;GO:0005840//ribosome	GO:0003735//structural constituent of ribosome;GO:0003735//structural constituent of ribosome;GO:0019843//rRNA binding;GO:0003735//structural constituent of ribosome;GO:0019843//rRNA binding	GO:0006412//translation;GO:0006412//translation;GO:0006412//translation
PDE_06802	128.612	53.2531	220.259	146.628	40.7254	-1.65902	0.935892	1.95972e-10	7.56529e-09	hypothetical protein	-	-	-	-
PDE_06826	287.7	187.707	301.94	159.214	132.411	-1.11954	0.923806	1.59988e-05	0.0002264	hypothetical protein	K16938|1|0.0|686|afm:AFUA_1G08850|septin 3/9/12 (A)	-	GO:0005525//GTP binding	GO:0007049//cell cycle
PDE_06879	135.753	98.8367	94.0683	39.477	54.9218	-1.30553	0.923305	0.000146997	0.00153536	putative beta-1,3-galactosyltransferase	-	GO:0016020//membrane	GO:0016757//transferase activity, transferring glycosyl groups	-
PDE_06999	34.2214	25.9965	33.9924	38.1566	16.7814	-1.02803	0.826082	0.000714862	0.00581714	hypothetical protein	-	-	-	-
PDE_07006	39.4399	55.1594	21.3784	34.1466	19.4252	-1.02173	0.83708	0.00108393	0.0082435	hypothetical protein	-	GO:0016021//integral component of membrane	-	GO:0055085//transmembrane transport
PDE_07008	3595.56	1050.98	2007.16	1445.19	607.749	-2.56467	0.967126	6.60989e-19	7.33242e-17	hypothetical protein	K03146|1|0.0|619|pcs:Pc22g07960|thiamine thiazole synthase (A)	-	-	GO:0006950//response to stress;GO:0009228//thiamine biosynthetic process
PDE_07056	36.3104	21.7257	30.7359	27.8675	8.85734	-2.03544	0.895352	2.25485e-07	4.66985e-06	hypothetical protein	-	-	-	-
PDE_07066	34.5568	29.081	26.5907	33.3113	16.4149	-1.07396	0.834352	0.0224613	0.0919312	hypothetical protein	K18183|1|1e-55|171|pcs:Pc16g06310|cytochrome c oxidase assembly protein subunit 19 (A)	-	-	-
PDE_07076	49.7909	40.7515	63.4761	89.2874	23.3222	-1.09418	0.865914	0.000705048	0.00574697	hypothetical protein	K02948|1|1e-104|303|afm:AFUA_1G09850|small subunit ribosomal protein S11 (A)	GO:0005840//ribosome;GO:0005840//ribosome	GO:0003735//structural constituent of ribosome;GO:0003735//structural constituent of ribosome	GO:0006412//translation;GO:0006412//translation
PDE_07093	32.4951	21.7083	18.2814	38.0773	13.4477	-1.27287	0.848424	5.20201e-05	0.000626774	hypothetical protein	-	-	-	-
PDE_07097	24.5674	14.8579	19.0894	16.0974	11.1905	-1.13447	0.804068	0.00680928	0.0369608	hypothetical protein	-	-	-	-
PDE_07138	30.7992	10.7475	8.61139	12.0075	12.8764	-1.25817	0.842346	0.000243139	0.00234185	hypothetical protein	-	-	-	-
PDE_07189	328.855	161.585	628.851	307.952	105.003	-1.64702	0.947961	4.05503e-13	2.46133e-11	hypothetical protein	K02918|1|2e-73|221|ang:ANI_1_1772074|large subunit ribosomal protein L35e (A)	-	-	-
PDE_07192	26.0329	17.2136	25.3385	22.9093	10.1809	-1.35448	0.832436	0.000183112	0.00185631	hypothetical protein	-	-	-	-
PDE_07217	76.1135	75.5903	21.1298	157.566	32.4421	-1.23028	0.901067	4.51779e-06	7.21874e-05	hypothetical protein	K00605|1|0.0|743|pcs:Pc16g07470|aminomethyltransferase [EC:2.1.2.10] (A)	-	-	-
PDE_07252	42.2633	31.9099	22.6749	22.8546	20.7459	-1.02658	0.845178	0.00175918	0.0122939	hypothetical protein	-	-	-	-
PDE_07263	150.429	185.714	92.9394	162.697	69.472	-1.11458	0.91279	3.86684e-05	0.000484032	hypothetical protein	-	-	-	-
PDE_07289	33.9264	21.0448	25.8813	15.7881	14.7712	-1.19962	0.846352	0.00116067	0.00877144	hypothetical protein	-	-	-	-
PDE_07292	16.1408	10.8598	8.79383	8.64934	4.15067	-1.9593	0.81239	4.4598e-08	1.07873e-06	hypothetical protein	-	-	-	-
PDE_07326	68.6344	53.964	75.7327	93.8301	25.4918	-1.4289	0.907818	2.27166e-06	3.88032e-05	hypothetical protein	K17424|1|5e-80|235|act:ACLA_016470|large subunit ribosomal protein L43, mitochondrial (A)	-	-	-
PDE_07328	31.5667	24.174	40.696	53.7304	15.4664	-1.02927	0.817362	0.0192766	0.0819915	hypothetical protein	K14815|1|2e-150|422|pcs:Pc21g03380|mRNA turnover protein 4 (A)	-	-	-
PDE_07351	28.8216	16.4736	14.5401	16.1644	12.0909	-1.25323	0.834628	0.0028942	0.0185225	hypothetical protein	-	-	-	-
PDE_07353	100.927	55.7399	208.977	60.3968	26.149	-1.94848	0.936686	1.93603e-17	1.90659e-15	hypothetical protein	-	-	-	-
PDE_07364	22.7068	13.3729	19.4584	13.612	9.7514	-1.21944	0.80431	0.000288439	0.00271848	hypothetical protein	-	-	-	-
PDE_07406	61.2573	53.1183	82.703	98.5384	28.0753	-1.12558	0.882921	0.00102339	0.00789223	hypothetical protein	-	-	-	-
PDE_07473	116.659	78.203	126.76	160.729	46.0538	-1.3409	0.920871	5.42054e-08	1.27847e-06	hypothetical protein	K10808|1|0.0|754|ang:ANI_1_944124|ribonucleoside-diphosphate reductase subunit M2 [EC:1.17.4.1] (A)	-	-	-
PDE_07475	1253.99	1756.17	6051.4	13131.5	561.427	-1.15935	0.935357	4.8909e-06	7.71275e-05	putative cutinase	K08095|1|5e-106|308|nfi:NFIA_102190|cutinase [EC:3.1.1.74] (A)	-	-	-
PDE_07512	31.8092	24.0578	39.7573	43.1122	12.1008	-1.39434	0.856072	9.39105e-05	0.00105756	hypothetical protein	K02867|1|3e-100|288|pcs:Pc21g06920|large subunit ribosomal protein L11 (A)	-	-	-
PDE_07533	33.8757	19.7828	4.39429	11.3914	15.9047	-1.0908	0.834041	0.000664003	0.00546317	hypothetical protein	-	-	-	-
PDE_07548	40.3487	36.1389	42.9414	41.3907	18.9295	-1.09188	0.849805	0.00965457	0.048504	hypothetical protein	-	-	-	-
PDE_07582	28.4874	16.481	21.5627	10.4151	9.31393	-1.61286	0.859474	0.000512565	0.00444055	hypothetical protein	-	-	-	-
PDE_07611	50.8044	27.769	42.9702	48.4807	10.5807	-2.26352	0.918747	5.42508e-06	8.43115e-05	hypothetical protein	K07243|1|0.0|519|pcs:Pc21g08030|high-affinity iron transporter (A)	GO:0016020//membrane	-	GO:0055085//transmembrane transport
PDE_07612	34.5515	23.4038	28.9113	44.2026	12.9841	-1.412	0.864567	0.00159751	0.0113867	hypothetical protein	-	-	GO:0005507//copper ion binding;GO:0005507//copper ion binding;GO:0005507//copper ion binding;GO:0016491//oxidoreductase activity;GO:0005507//copper ion binding;GO:0016491//oxidoreductase activity	GO:0055114//oxidation-reduction process;GO:0055114//oxidation-reduction process
PDE_07667	87.4168	76.5516	159.261	104.298	30.3386	-1.52675	0.920128	3.07864e-05	0.000395632	hypothetical protein	K00381|1|0.0|2696|pcs:Pc21g02880|sulfite reductase (NADPH) hemoprotein beta-component [EC:1.8.1.2] (A)	-	GO:0016491//oxidoreductase activity;GO:0020037//heme binding;GO:0051536//iron-sulfur cluster binding;GO:0005506//iron ion binding;GO:0010181//FMN binding;GO:0005506//iron ion binding;GO:0010181//FMN binding;GO:0005506//iron ion binding;GO:0010181//FMN binding;GO:0005506//iron ion binding;GO:0010181//FMN binding;GO:0016491//oxidoreductase activity;GO:0020037//heme binding;GO:0051536//iron-sulfur c…	GO:0055114//oxidation-reduction process;GO:0055114//oxidation-reduction process;GO:0055114//oxidation-reduction process;GO:0055114//oxidation-reduction process;GO:0055114//oxidation-reduction process;GO:0055114//oxidation-reduction process;GO:0055114//oxidation-reduction process;GO:0055114//oxidation-reduction process;GO:0055114//oxidation-reduction process;GO:0055114//oxidation-reduction process…
PDE_07700	36.9951	16.8877	20.6176	57.9804	14.8243	-1.31937	0.863376	0.000701771	0.0057251	hypothetical protein	-	-	-	-
PDE_07723	158.136	145.579	99.4854	59.7462	51.7774	-1.61077	0.937619	0.0708974	0.21223	hypothetical protein	K15437|1|0.0|641|pcs:Pc21g02360|aminoacyl tRNA synthase complex-interacting multifunctional protein 1 (A)	-	GO:0000049//tRNA binding;GO:0000049//tRNA binding	-
PDE_07724	136.244	113.18	92.0087	61.3928	62.1957	-1.13131	0.912566	1.70019e-05	0.000238844	hypothetical protein	-	-	GO:0004190//aspartic-type endopeptidase activity;GO:0004190//aspartic-type endopeptidase activity;GO:0004190//aspartic-type endopeptidase activity;GO:0004190//aspartic-type endopeptidase activity;GO:0004190//aspartic-type endopeptidase activity;GO:0004190//aspartic-type endopeptidase activity;GO:0004190//aspartic-type endopeptidase activity	GO:0006508//proteolysis;GO:0006508//proteolysis;GO:0006508//proteolysis;GO:0006508//proteolysis;GO:0006508//proteolysis;GO:0006508//proteolysis;GO:0006508//proteolysis
PDE_07725	40.8397	32.6344	25.9235	15.6115	17.2126	-1.2465	0.866104	1.55329e-05	0.00022013	hypothetical protein	-	-	-	-
PDE_07766	31.6122	30.1715	29.854	33.5205	13.8625	-1.1893	0.838444	6.14904e-05	0.000723426	hypothetical protein	K09503|1|0.0|606|nfi:NFIA_091540|DnaJ homolog subfamily A member 2 (A)	-	GO:0005524//ATP binding;GO:0051082//unfolded protein binding;GO:0031072//heat shock protein binding;GO:0051082//unfolded protein binding;GO:0031072//heat shock protein binding;GO:0051082//unfolded protein binding	GO:0006457//protein folding;GO:0009408//response to heat
PDE_07774	566.765	312.825	1097.37	752.749	216.188	-1.39047	0.943748	4.50353e-09	1.30521e-07	hypothetical protein	K02912|1|2e-77|229|pcs:Pc21g01520|large subunit ribosomal protein L32e (A)	GO:0005622//intracellular;GO:0005840//ribosome;GO:0005622//intracellular;GO:0005840//ribosome	GO:0003735//structural constituent of ribosome;GO:0003735//structural constituent of ribosome	GO:0006412//translation;GO:0006412//translation
PDE_07808	54.1636	70.5537	18.0682	28.4801	25.1508	-1.10672	0.872596	0.000215602	0.00212108	hypothetical protein	K15084|1|0.0|546|ang:ANI_1_1306184|solute carrier family 25 (mitochondrial carrier protein), member 16 (A)	GO:0005743//mitochondrial inner membrane;GO:0005743//mitochondrial inner membrane	-	GO:0055085//transmembrane transport;GO:0055085//transmembrane transport;GO:0055085//transmembrane transport;GO:0055085//transmembrane transport
PDE_07836	431.714	229.779	634.867	323.238	112.597	-1.93891	0.955385	4.06622e-19	4.56315e-17	hypothetical protein	K02128|1|6e-72|216|pcs:Pc21g19380|F-type H+-transporting ATPase subunit c (A)	GO:0045263//proton-transporting ATP synthase complex, coupling factor F(o);GO:0045263//proton-transporting ATP synthase complex, coupling factor F(o);GO:0045263//proton-transporting ATP synthase complex, coupling factor F(o);GO:0033177//proton-transporting two-sector ATPase complex, proton-transporting domain	GO:0015078//hydrogen ion transmembrane transporter activity;GO:0015078//hydrogen ion transmembrane transporter activity;GO:0015078//hydrogen ion transmembrane transporter activity;GO:0015078//hydrogen ion transmembrane transporter activity	GO:0015986//ATP synthesis coupled proton transport;GO:0015986//ATP synthesis coupled proton transport;GO:0015986//ATP synthesis coupled proton transport;GO:0015991//ATP hydrolysis coupled proton transport
PDE_07841	34.7137	24.9066	45.6796	56.3335	17.2311	-1.01049	0.824165	0.00321731	0.0203391	hypothetical protein	K17427|1|0.0|526|afv:AFLA_002470|large subunit ribosomal protein L46, mitochondrial (A)	-	-	-
PDE_07853	285.347	163.303	615.211	296.563	99.4107	-1.52124	0.941814	6.05208e-10	2.10861e-08	hypothetical protein	K02921|1|5e-59|179|ang:ANI_1_1328184|large subunit ribosomal protein L37Ae (A)	GO:0005622//intracellular;GO:0005840//ribosome;GO:0005622//intracellular;GO:0005840//ribosome;GO:0005622//intracellular;GO:0005840//ribosome	GO:0003735//structural constituent of ribosome;GO:0003735//structural constituent of ribosome;GO:0003735//structural constituent of ribosome	GO:0006412//translation;GO:0006412//translation;GO:0006412//translation
PDE_07863	270.749	135.987	241.249	299.091	88.406	-1.61474	0.944352	2.99193e-10	1.11058e-08	hypothetical protein	-	-	-	-
PDE_07868	23.2815	8.10726	1.60979	1.4961	8.98874	-1.373	0.821403	0.0229308	0.0934567	hypothetical protein	K00706|1|4e-06|50.8|mtm:MYCTH_140260|1,3-beta-glucan synthase [EC:2.4.1.34] (A)	-	-	-
PDE_07956	56.2685	232.517	16.79	3.04786	11.1266	-2.33831	0.924462	0.240216	0.479687	hypothetical protein	K00480|1|0.0|752|pcs:Pc06g00170|salicylate hydroxylase [EC:1.14.13.1] (A)	-	GO:0016491//oxidoreductase activity;GO:0016491//oxidoreductase activity;GO:0016491//oxidoreductase activity;GO:0016491//oxidoreductase activity;GO:0016491//oxidoreductase activity	GO:0008152//metabolic process;GO:0008152//metabolic process;GO:0008152//metabolic process;GO:0008152//metabolic process;GO:0008152//metabolic process
PDE_07985	40.1149	34.0022	39.0536	38.304	19.818	-1.01733	0.83815	0.00235599	0.0155365	hypothetical protein	K10739|1|6e-149|421|pcs:Pc21g21700|replication factor A2 (A)	-	GO:0003676//nucleic acid binding	-
PDE_07996	113.739	167.9	21.7064	26.1167	35.0876	-1.6967	0.933889	2.70018e-13	1.68125e-11	hypothetical protein	K00020|1|0.0|554|pcs:Pc21g20910|3-hydroxyisobutyrate dehydrogenase [EC:1.1.1.31] (A)	-	GO:0008442//3-hydroxyisobutyrate dehydrogenase activity;GO:0004616//phosphogluconate dehydrogenase (decarboxylating) activity	GO:0006573//valine metabolic process;GO:0055114//oxidation-reduction process;GO:0006098//pentose-phosphate shunt;GO:0055114//oxidation-reduction process
PDE_08014	132.893	25.8117	3.80253	3.3936	18.7749	-2.82339	0.951483	0.000107994	0.00118978	hypothetical protein	-	-	-	-
PDE_08015	65.6971	13.3275	3.22424	2.29706	8.43529	-2.96132	0.935996	9.3537e-05	0.00105459	hypothetical protein	-	-	-	-
PDE_08075	677.892	423.923	514.516	777.9	303.98	-1.15708	0.932853	0.00564269	0.0319025	hypothetical protein	-	-	-	-
PDE_08079	73.8363	25.1291	33.652	42.3011	22.3244	-1.72571	0.922045	1.76522e-08	4.61684e-07	hypothetical protein	-	-	-	-
PDE_08080	76.8297	30.3464	46.9535	51.31	25.522	-1.58993	0.918799	7.42917e-09	2.05441e-07	hypothetical protein	-	-	-	-
PDE_08090	130.336	92.6266	99.5258	184.103	47.8637	-1.44523	0.92833	8.87593e-07	1.6708e-05	hypothetical protein	-	-	-	-
PDE_08100	760.069	438.725	1546.52	1021.2	291.303	-1.38361	0.944145	3.14197e-09	9.50569e-08	hypothetical protein	K02964|1|3e-107|306|pcs:Pc22g00880|small subunit ribosomal protein S18e (A)	GO:0005622//intracellular;GO:0005840//ribosome;GO:0005840//ribosome;GO:0005622//intracellular;GO:0005840//ribosome;GO:0005622//intracellular;GO:0005840//ribosome	GO:0003723//RNA binding;GO:0003735//structural constituent of ribosome;GO:0003723//RNA binding;GO:0003735//structural constituent of ribosome;GO:0003723//RNA binding;GO:0003735//structural constituent of ribosome;GO:0003723//RNA binding;GO:0003735//structural constituent of ribosome	GO:0006412//translation;GO:0006412//translation;GO:0006412//translation;GO:0006412//translation
PDE_08104	199.676	150.933	80.8068	54.9071	92.9274	-1.10349	0.917021	0.0012146	0.0091365	hypothetical protein	-	-	-	-
PDE_08118	64.1134	52.0733	66.0745	105.941	30.3545	-1.07872	0.880642	5.01704e-05	0.000610586	hypothetical protein	K12830|1|0.0|2271|nfi:NFIA_059370|splicing factor 3B subunit 3 (A)	GO:0005634//nucleus	GO:0003676//nucleic acid binding	-
PDE_08142	509.087	306.023	953.018	583.437	208.952	-1.28474	0.937601	1.38244e-07	3.01854e-06	hypothetical protein	K02910|1|2e-74|220|pcs:Pc22g01480|large subunit ribosomal protein L31e (A)	GO:0005622//intracellular;GO:0005840//ribosome	GO:0003735//structural constituent of ribosome	GO:0006412//translation
PDE_08150	150.269	111.132	45.0899	269.483	63.4243	-1.24444	0.921631	4.07093e-07	8.15115e-06	hypothetical protein	K03317|1|0.0|924|pcs:Pc22g02350|concentrative nucleoside transporter, CNT family (A)	GO:0016020//membrane	GO:0005415//nucleoside:sodium symporter activity	GO:0006810//transport
PDE_08167	33.5505	30.6693	28.1229	37.5326	15.9378	-1.07388	0.831313	0.000441685	0.00390715	hypothetical protein	K15272|1|0.0|644|pcs:Pc22g02140|solute carrier family 35 (UDP-sugar transporter), member A1/2/3 (A)	GO:0000139//Golgi membrane;GO:0016021//integral component of membrane;GO:0016021//integral component of membrane	GO:0005351//sugar:proton symporter activity;GO:0005338//nucleotide-sugar transmembrane transporter activity	GO:0008643//carbohydrate transport;GO:0015780//nucleotide-sugar transport
PDE_08174	277.304	151.53	581.048	378.201	106.694	-1.37799	0.936617	8.63652e-09	2.35455e-07	hypothetical protein	K02936|1|2e-178|495|pcs:Pc22g02060|large subunit ribosomal protein L7Ae (A)	GO:0030529//ribonucleoprotein complex	-	GO:0042254//ribosome biogenesis
PDE_08205	451.058	244.154	921.818	460.436	150.334	-1.58514	0.947978	1.1742e-10	4.72174e-09	hypothetical protein	K02980|1|6e-35|115|pcs:Pc22g01560|small subunit ribosomal protein S29e (A)	GO:0005622//intracellular;GO:0005840//ribosome;GO:0005622//intracellular;GO:0005840//ribosome	GO:0003735//structural constituent of ribosome;GO:0003735//structural constituent of ribosome	GO:0006412//translation;GO:0006412//translation
PDE_08216	472.475	246.039	875.676	510.009	164.526	-1.52192	0.946113	2.60974e-11	1.21674e-09	hypothetical protein	K02947|1|2e-91|268|cpw:CPC735_047820|small subunit ribosomal protein S10e (A)	-	-	-
PDE_08230	88.3347	50.6962	91.0599	102.044	36.8853	-1.25993	0.90837	6.26364e-06	9.5953e-05	hypothetical protein	K11187|1|2e-106|306|pcs:Pc22g04430|peroxiredoxin 5, atypical 2-Cys peroxiredoxin [EC:1.11.1.15] (A)	-	GO:0016491//oxidoreductase activity	-
PDE_08272	80.5944	58.9207	92.8756	97.6412	29.9824	-1.42657	0.913706	8.29339e-08	1.88772e-06	hypothetical protein	K11128|1|2e-70|216|ang:ANI_1_1280014|H/ACA ribonucleoprotein complex subunit 1 (A)	-	-	GO:0001522//pseudouridine synthesis;GO:0042254//ribosome biogenesis
PDE_08338	328.844	187.845	722.095	433.295	135.859	-1.2753	0.934079	1.58145e-07	3.38417e-06	hypothetical protein	K14753|1|0.0|643|pcs:Pc22g03140|guanine nucleotide-binding protein subunit beta-2-like 1 protein (A)	-	GO:0005515//protein binding;GO:0005515//protein binding;GO:0005515//protein binding;GO:0005515//protein binding;GO:0005515//protein binding;GO:0005515//protein binding;GO:0005515//protein binding;GO:0005515//protein binding;GO:0005515//protein binding;GO:0005515//protein binding;GO:0005515//protein binding;GO:0005515//protein binding;GO:0005515//protein binding;GO:0005515//protein binding;GO:0005…	-
PDE_08394	45.6578	35.0377	28.5632	25.0614	20.3316	-1.16714	0.867105	0.000128329	0.00138072	hypothetical protein	-	GO:0005783//endoplasmic reticulum;GO:0016021//integral component of membrane	GO:0047750//cholestenol delta-isomerase activity	GO:0016125//sterol metabolic process
PDE_08435	38.5838	29.8536	34.548	18.7524	19.0385	-1.01908	0.834853	0.000791376	0.00631726	hypothetical protein	-	-	-	-
PDE_08477	140.374	135.568	152.936	203.766	50.9752	-1.46141	0.930471	7.96711e-10	2.70741e-08	hypothetical protein	-	-	GO:0001671//ATPase activator activity;GO:0051087//chaperone binding;GO:0001671//ATPase activator activity;GO:0051087//chaperone binding	GO:0006950//response to stress
PDE_08489	102.17	78.7638	69.7084	31.381	35.461	-1.52667	0.925325	1.21154e-08	3.23895e-07	hypothetical protein	-	-	-	-
PDE_08490	218.618	152.347	177.041	85.5735	67.2125	-1.70161	0.944525	4.21261e-15	3.15162e-13	hypothetical protein	-	-	GO:0005515//protein binding;GO:0005543//phospholipid binding;GO:0005515//protein binding;GO:0005543//phospholipid binding	-
PDE_08500	52.2414	28.4227	35.2739	38.5382	25.0156	-1.06236	0.865465	0.00049648	0.00433623	hypothetical protein	-	-	-	-
PDE_08527	36.3635	26.2798	36.7131	34.0918	17.7613	-1.03376	0.832211	0.00182004	0.0126187	hypothetical protein	-	GO:0005840//ribosome;GO:0005840//ribosome;GO:0005622//intracellular;GO:0005840//ribosome	GO:0003735//structural constituent of ribosome;GO:0003735//structural constituent of ribosome;GO:0003735//structural constituent of ribosome	GO:0006412//translation;GO:0006412//translation;GO:0006412//translation
PDE_08539	59.8453	96.736	4.58751	4.56883	9.06685	-2.72256	0.930816	4.08214e-11	1.79894e-09	hypothetical protein	K09699|1|0.0|701|pcs:Pc22g05180|2-oxoisovalerate dehydrogenase E2 component (dihydrolipoyl transacylase) [EC:2.3.1.168] (A)	-	GO:0016746//transferase activity, transferring acyl groups;GO:0016746//transferase activity, transferring acyl groups	GO:0008152//metabolic process;GO:0008152//metabolic process
PDE_08547	109.69	109.954	80.4528	156.501	35.6348	-1.62207	0.930989	5.19743e-05	0.000626774	hypothetical protein	K03009|1|2e-34|115|act:ACLA_051000|DNA-directed RNA polymerases I, II, and III subunit RPABC4 (A)	-	GO:0003677//DNA binding;GO:0003899//DNA-directed RNA polymerase activity;GO:0003677//DNA binding;GO:0003899//DNA-directed RNA polymerase activity	GO:0006351//transcription, DNA-templated;GO:0006351//transcription, DNA-templated
PDE_08578	24.8553	18.8019	24.4076	12.5208	9.97948	-1.31652	0.824079	3.45512e-05	0.000439913	hypothetical protein	-	-	-	-
PDE_08582	57.3098	35.4771	62.8286	112.465	21.6166	-1.40664	0.898615	0.000700902	0.00572285	hypothetical protein	-	-	-	-
PDE_08629	110.9	77.5605	323.989	69.2579	48.7463	-1.18589	0.911323	3.95127e-06	6.39827e-05	hypothetical protein	K08054|1|0.0|927|pcs:Pc22g02800|calnexin (A)	GO:0005783//endoplasmic reticulum;GO:0005783//endoplasmic reticulum;GO:0005783//endoplasmic reticulum;GO:0005783//endoplasmic reticulum;GO:0005783//endoplasmic reticulum;GO:0005783//endoplasmic reticulum;GO:0005783//endoplasmic reticulum	GO:0005509//calcium ion binding;GO:0005509//calcium ion binding;GO:0005509//calcium ion binding;GO:0005509//calcium ion binding;GO:0005509//calcium ion binding;GO:0051082//unfolded protein binding;GO:0005509//calcium ion binding;GO:0051082//unfolded protein binding;GO:0005509//calcium ion binding;GO:0051082//unfolded protein binding;GO:0005509//calcium ion binding;GO:0051082//unfolded protein bin…	GO:0006457//protein folding;GO:0006457//protein folding;GO:0006457//protein folding;GO:0006457//protein folding;GO:0006457//protein folding;GO:0006457//protein folding;GO:0006457//protein folding
PDE_08631	229.91	167.611	128.16	225.085	100.629	-1.19203	0.925705	4.33363e-06	6.97065e-05	hypothetical protein	-	-	-	-
PDE_08640	31.6114	38.6116	13.5645	10.3091	11.6139	-1.44459	0.858196	1.34998e-07	2.95435e-06	hypothetical protein	-	-	GO:0005524//ATP binding;GO:0016772//transferase activity, transferring phosphorus-containing groups;GO:0016772//transferase activity, transferring phosphorus-containing groups;GO:0005524//ATP binding	GO:0016310//phosphorylation;GO:0016310//phosphorylation
PDE_08706	334.831	267.337	148.922	313.356	163.247	-1.03637	0.918816	0.00255546	0.0166528	hypothetical protein	-	-	-	-
PDE_08733	18.0409	41.2014	2.18108	1.78026	2.77043	-2.70309	0.846783	0.243158	0.483361	putative chitosanase	K01233|1|2e-153|435|pcs:Pc12g07820|chitosanase [EC:3.2.1.132] (A)	-	-	-
PDE_08788	56.6259	50.1885	204.248	141.944	12.5921	-2.16894	0.922287	6.03253e-07	1.17616e-05	hypothetical protein	K00380|1|0.0|1806|pcs:Pc12g08580|sulfite reductase (NADPH) flavoprotein alpha-component [EC:1.8.1.2] (A)	-	GO:0016491//oxidoreductase activity;GO:0016491//oxidoreductase activity;GO:0016491//oxidoreductase activity;GO:0016491//oxidoreductase activity;GO:0016491//oxidoreductase activity;GO:0016491//oxidoreductase activity;GO:0016491//oxidoreductase activity;GO:0016491//oxidoreductase activity;GO:0016903//oxidoreductase activity, acting on the aldehyde or oxo group of donors;GO:0016491//oxidoreductase a…	GO:0055114//oxidation-reduction process;GO:0055114//oxidation-reduction process;GO:0055114//oxidation-reduction process;GO:0055114//oxidation-reduction process;GO:0055114//oxidation-reduction process;GO:0055114//oxidation-reduction process;GO:0055114//oxidation-reduction process;GO:0055114//oxidation-reduction process;GO:0055114//oxidation-reduction process;GO:0055114//oxidation-reduction process
PDE_08796	38.9306	26.4026	12.7003	33.3678	15.9189	-1.29017	0.865707	3.60141e-05	0.000455533	hypothetical protein	-	-	GO:0030246//carbohydrate binding;GO:0030246//carbohydrate binding	GO:0005975//carbohydrate metabolic process;GO:0005975//carbohydrate metabolic process
PDE_08806	102.985	176.858	5.60612	9.42738	12.1465	-3.08383	0.948548	1.88588e-23	3.03344e-21	hypothetical protein	K00166|1|0.0|803|pcs:Pc12g08790|2-oxoisovalerate dehydrogenase E1 component alpha subunit [EC:1.2.4.4] (A)	-	GO:0016624//oxidoreductase activity, acting on the aldehyde or oxo group of donors, disulfide as acceptor	GO:0008152//metabolic process
PDE_08813	26.0525	33.616	2.58002	8.91552	11.3641	-1.19693	0.818433	0.000834382	0.0065951	hypothetical protein	K00309|2|0.0|674|afm:AFUA_6G08760|[EC:1.5.3.-] (A)	-	GO:0004657//proline dehydrogenase activity	GO:0006537//glutamate biosynthetic process;GO:0006562//proline catabolic process;GO:0055114//oxidation-reduction process
PDE_08864	22.2163	18.359	9.42693	10.8778	5.91479	-1.90922	0.847906	2.15814e-06	3.69294e-05	hypothetical protein	-	-	-	-
PDE_08878	1621.48	3012.52	1347.74	8331.2	598.358	-1.43823	0.9486	2.01386e-10	7.68214e-09	hypothetical protein	K01610|1|0.0|1140|pcs:Pc12g09360|phosphoenolpyruvate carboxykinase (ATP) [EC:4.1.1.49] (A)	-	GO:0004612//phosphoenolpyruvate carboxykinase (ATP) activity;GO:0005524//ATP binding;GO:0004612//phosphoenolpyruvate carboxykinase (ATP) activity;GO:0005524//ATP binding;GO:0004612//phosphoenolpyruvate carboxykinase (ATP) activity;GO:0005524//ATP binding;GO:0004612//phosphoenolpyruvate carboxykinase (ATP) activity;GO:0005524//ATP binding	GO:0006094//gluconeogenesis;GO:0006094//gluconeogenesis;GO:0006094//gluconeogenesis;GO:0006094//gluconeogenesis
PDE_08879	397.466	253.398	223.721	722.557	150.134	-1.40458	0.941279	0.00204065	0.0138888	hypothetical protein	K15104|1|0.0|537|pcs:Pc12g09330|solute carrier family 25 (mitochondrial oxoglutarate transporter), member 11 (A)	-	-	GO:0055085//transmembrane transport;GO:0055085//transmembrane transport;GO:0055085//transmembrane transport;GO:0055085//transmembrane transport
PDE_08912	145.971	41.7141	79.0933	68.3936	29.6093	-2.30156	0.948669	1.87812e-07	3.93184e-06	hypothetical protein	-	-	-	-
PDE_08917	233.184	393.749	64.4428	58.0527	90.2445	-1.36955	0.934701	0.144229	0.345218	hypothetical protein	K01426|1|0.0|837|pcs:Pc12g09880|amidase [EC:3.5.1.4] (A)	-	GO:0016884//carbon-nitrogen ligase activity, with glutamine as amido-N-donor	-
PDE_08947	173.294	257.863	61.2244	79.7364	44.937	-1.94724	0.946614	0.0927311	0.257095	hypothetical protein	K00391|4|2e-98|288|afm:AFUA_6G07840|[EC:1.8.4.-] (A)	-	GO:0033743//peptide-methionine (R)-S-oxide reductase activity;GO:0033743//peptide-methionine (R)-S-oxide reductase activity	GO:0055114//oxidation-reduction process;GO:0055114//oxidation-reduction process
PDE_08951	86.9231	53.1872	75.5305	71.8954	30.8242	-1.49567	0.918575	2.50688e-05	0.000333249	hypothetical protein	-	-	-	-
PDE_08962	432.981	429.132	331.895	277.315	150.266	-1.52678	0.945578	0.00031918	0.00295909	hypothetical protein	-	-	GO:0020037//heme binding;GO:0020037//heme binding;GO:0020037//heme binding;GO:0020037//heme binding;GO:0020037//heme binding;GO:0020037//heme binding;GO:0020037//heme binding	-
PDE_08980	170.991	122.127	883.961	323.766	82.6121	-1.04949	0.910494	0.000132932	0.00142073	putative Hsp70 molecular chaperone	K09490|1|0.0|1236|pcs:Pc12g10670|heat shock 70kDa protein 5 (A)	-	-	-
PDE_08981	29.4247	23.8249	10.7305	17.2327	10.9457	-1.42667	0.850996	2.08875e-05	0.000285128	hypothetical protein	K13953|3|3e-65|211|ani:AN2061.2|alcohol dehydrogenase, propanol-preferring [EC:1.1.1.1] (A)	-	-	-
PDE_08982	127.28	33.4637	30.5912	199.336	19.3917	-2.71449	0.949826	1.63711e-18	1.75553e-16	hypothetical protein	-	-	-	-
PDE_08990	42.0571	24.7934	33.2761	41.4003	14.1865	-1.56783	0.888083	9.54679e-08	2.14769e-06	putative chitin glucanosyltransferase	-	-	GO:0004553//hydrolase activity, hydrolyzing O-glycosyl compounds	GO:0005975//carbohydrate metabolic process
PDE_08996	37.0129	26.1347	61.759	74.6726	17.9236	-1.04617	0.837132	0.00053248	0.00458427	hypothetical protein	K14826|1|0.0|520|pcs:Pc12g11330|FK506-binding nuclear protein [EC:5.2.1.8] (A)	-	-	GO:0006457//protein folding;GO:0006457//protein folding
PDE_09014	54.0262	33.999	43.5214	22.8379	14.1971	-1.92807	0.915225	8.61708e-15	6.30026e-13	putative endo-beta-1,4-glucanase	-	-	GO:0008810//cellulase activity	GO:0000272//polysaccharide catabolic process
PDE_09016	64.6665	46.3744	50.3589	35.1264	21.2416	-1.60613	0.91336	3.12512e-12	1.65717e-10	putative cellulose synthase	-	-	-	-
PDE_09038	398.439	592.417	118.44	106.785	51.7107	-2.94582	0.963431	0.0529289	0.172982	hypothetical protein	K11173|1|0.0|912|afv:AFLA_035760|hydroxyacid-oxoacid transhydrogenase [EC:1.1.99.24] (A)	-	GO:0016491//oxidoreductase activity;GO:0046872//metal ion binding	GO:0055114//oxidation-reduction process
PDE_09047	158.037	210.17	15.4234	16.3601	34.0268	-2.21552	0.948928	8.36116e-08	1.89867e-06	hypothetical protein	K00167|1|0.0|694|pcs:Pc12g11200|2-oxoisovalerate dehydrogenase E1 component beta subunit [EC:1.2.4.4] (A)	-	GO:0003824//catalytic activity	GO:0008152//metabolic process
PDE_09048	120.09	84.4188	163.057	142.816	44.1228	-1.44451	0.925912	1.30187e-09	4.23043e-08	hypothetical protein	K01940|1|0.0|803|pcs:Pc12g11190|argininosuccinate synthase [EC:6.3.4.5] (A)	-	GO:0004055//argininosuccinate synthase activity;GO:0005524//ATP binding;GO:0004055//argininosuccinate synthase activity;GO:0005524//ATP binding;GO:0004055//argininosuccinate synthase activity;GO:0005524//ATP binding;GO:0004055//argininosuccinate synthase activity;GO:0004055//argininosuccinate synthase activity;GO:0005524//ATP binding	GO:0006526//arginine biosynthetic process;GO:0006526//arginine biosynthetic process;GO:0006526//arginine biosynthetic process;GO:0006526//arginine biosynthetic process
PDE_09101	275.514	201.114	138.097	94.3916	111.661	-1.303	0.933302	7.35928e-08	1.68704e-06	hypothetical protein	-	-	-	-
PDE_09135	138.972	120.825	133.58	338.42	59.3494	-1.22749	0.919507	1.43938e-06	2.58205e-05	hypothetical protein	K01647|1|0.0|918|pcs:Pc12g05400|citrate synthase [EC:2.3.3.1] (A)	-	GO:0004108//citrate (Si)-synthase activity;GO:0046912//transferase activity, transferring acyl groups, acyl groups converted into alkyl on transfer;GO:0046912//transferase activity, transferring acyl groups, acyl groups converted into alkyl on transfer;GO:0046912//transferase activity, transferring acyl groups, acyl groups converted into alkyl on transfer;GO:0046912//transferase activity, transfe…	GO:0044262//cellular carbohydrate metabolic process;GO:0006099//tricarboxylic acid cycle;GO:0044262//cellular carbohydrate metabolic process;GO:0044262//cellular carbohydrate metabolic process;GO:0044262//cellular carbohydrate metabolic process;GO:0044262//cellular carbohydrate metabolic process;GO:0044262//cellular carbohydrate metabolic process;GO:0044262//cellular carbohydrate metabolic proces…
PDE_09141	71.6568	23.0834	317.68	109.707	14.3698	-2.31806	0.93237	4.89251e-05	0.000598449	hypothetical protein	K17069|1|0.0|815|pcs:Pc12g05420|O-acetylhomoserine/O-acetylserine sulfhydrylase [EC:2.5.1.49 2.5.1.47] (A)	-	GO:0016765//transferase activity, transferring alkyl or aryl (other than methyl) groups;GO:0030170//pyridoxal phosphate binding;GO:0030170//pyridoxal phosphate binding	GO:0006520//cellular amino acid metabolic process
PDE_09149	468.375	465.181	560.134	2104	209.283	-1.16221	0.93035	3.78463e-06	6.14906e-05	hypothetical protein	K04079|1|0.0|1208|abe:ARB_01274|molecular chaperone HtpG (A)	-	GO:0005524//ATP binding;GO:0051082//unfolded protein binding;GO:0005524//ATP binding;GO:0051082//unfolded protein binding;GO:0005524//ATP binding;GO:0051082//unfolded protein binding;GO:0005524//ATP binding	GO:0006457//protein folding;GO:0006950//response to stress;GO:0006457//protein folding;GO:0006950//response to stress;GO:0006457//protein folding;GO:0006950//response to stress
PDE_09174	346.946	219.354	602.331	408.85	159.742	-1.11897	0.925602	2.57691e-05	0.000340293	hypothetical protein	K02953|1|7e-103|295|nfi:NFIA_026490|small subunit ribosomal protein S13e (A)	GO:0005622//intracellular;GO:0005840//ribosome;GO:0005840//ribosome;GO:0005622//intracellular;GO:0005840//ribosome	GO:0003735//structural constituent of ribosome;GO:0003735//structural constituent of ribosome;GO:0003735//structural constituent of ribosome	GO:0006412//translation;GO:0006412//translation;GO:0006412//translation
PDE_09249	27.6485	11.7909	9.53665	5.82008	7.58732	-1.86554	0.868003	2.49015e-13	1.57126e-11	putative alpha-mannosidase	K01230|1|0.0|805|ani:AN0551.2|mannosyl-oligosaccharide alpha-1,2-mannosidase [EC:3.2.1.113] (A)	GO:0016020//membrane;GO:0016020//membrane;GO:0016020//membrane;GO:0016020//membrane;GO:0016020//membrane;GO:0016020//membrane;GO:0016020//membrane;GO:0016020//membrane	GO:0004571//mannosyl-oligosaccharide 1,2-alpha-mannosidase activity;GO:0005509//calcium ion binding;GO:0004571//mannosyl-oligosaccharide 1,2-alpha-mannosidase activity;GO:0005509//calcium ion binding;GO:0004571//mannosyl-oligosaccharide 1,2-alpha-mannosidase activity;GO:0005509//calcium ion binding;GO:0004571//mannosyl-oligosaccharide 1,2-alpha-mannosidase activity;GO:0005509//calcium ion binding…	-
PDE_09261	96.6402	57.7821	45.5813	72.2107	43.4107	-1.15457	0.903571	1.66218e-05	0.000234528	hypothetical protein	K08178|1|0.0|843|pcs:Pc12g06700|MFS transporter, SHS family, lactate transporter (A)	GO:0016021//integral component of membrane	GO:0022857//transmembrane transporter activity	GO:0055085//transmembrane transport
PDE_09284	25.0809	18.0812	25.0085	8.42747	9.78365	-1.35815	0.828913	1.78559e-05	0.000247597	hypothetical protein	-	-	-	-
PDE_09312	133.083	106.416	88.0307	210.29	53.4046	-1.31729	0.923012	8.01087e-08	1.82773e-06	hypothetical protein	K09510|1|8e-164|467|ani:AN2238.2|DnaJ homolog subfamily B member 4 (A)	-	-	-
PDE_09351	36.4504	27.7316	43.2443	44.588	17.3368	-1.0721	0.839169	0.000706507	0.00575401	hypothetical protein	K02931|1|0.0|574|afv:AFLA_048890|large subunit ribosomal protein L5 (A)	GO:0005840//ribosome	GO:0003735//structural constituent of ribosome	GO:0006412//translation
PDE_09361	572.5	294.369	1032.26	579.444	214.183	-1.41843	0.944404	5.41369e-10	1.90685e-08	hypothetical protein	K02938|1|1e-177|492|act:ACLA_009680|large subunit ribosomal protein L8e (A)	GO:0005840//ribosome;GO:0005840//ribosome;GO:0005622//intracellular;GO:0005840//ribosome	GO:0003735//structural constituent of ribosome;GO:0003735//structural constituent of ribosome;GO:0003735//structural constituent of ribosome	GO:0006412//translation;GO:0006412//translation;GO:0006412//translation
PDE_09366	48.1418	30.3928	73.3731	31.7719	23.6878	-1.02315	0.853534	0.00074197	0.00598266	hypothetical protein	K12670|1|0.0|769|pcs:Pc21g17310|oligosaccharyltransferase complex subunit beta (A)	GO:0005789//endoplasmic reticulum membrane	GO:0004579//dolichyl-diphosphooligosaccharide-protein glycotransferase activity	GO:0018279//protein N-linked glycosylation via asparagine
PDE_09377	3689.87	1484.76	1465.23	1068.74	321.738	-3.51961	0.971753	1.31767e-73	2.11947e-70	hypothetical protein	-	GO:0016020//membrane;GO:0016020//membrane;GO:0016020//membrane;GO:0016020//membrane;GO:0016020//membrane;GO:0016020//membrane;GO:0016020//membrane;GO:0016020//membrane;GO:0016021//integral component of membrane	GO:0022891//substrate-specific transmembrane transporter activity;GO:0005215//transporter activity;GO:0005215//transporter activity;GO:0022891//substrate-specific transmembrane transporter activity;GO:0022891//substrate-specific transmembrane transporter activity;GO:0022891//substrate-specific transmembrane transporter activity;GO:0022891//substrate-specific transmembrane transporter activity;GO:…	GO:0055085//transmembrane transport;GO:0006810//transport;GO:0055085//transmembrane transport;GO:0006810//transport;GO:0055085//transmembrane transport;GO:0055085//transmembrane transport;GO:0055085//transmembrane transport;GO:0055085//transmembrane transport;GO:0055085//transmembrane transport;GO:0055085//transmembrane transport;GO:0055085//transmembrane transport
PDE_09400	34.4109	17.7598	62.1735	23.209	10.2655	-1.74507	0.881902	1.01585e-13	6.85591e-12	hypothetical protein	K15979|1|0.0|1482|pcs:Pc21g16930|staphylococcal nuclease domain-containing protein 1 (A)	-	GO:0003676//nucleic acid binding;GO:0003676//nucleic acid binding;GO:0003676//nucleic acid binding;GO:0003676//nucleic acid binding;GO:0003676//nucleic acid binding;GO:0003676//nucleic acid binding;GO:0003676//nucleic acid binding;GO:0003676//nucleic acid binding;GO:0003676//nucleic acid binding;GO:0003676//nucleic acid binding;GO:0003676//nucleic acid binding;GO:0003676//nucleic acid binding	-
PDE_09402	83.2877	108.522	84.2396	143.573	32.3651	-1.36367	0.912031	1.05216e-07	2.34513e-06	hypothetical protein	-	-	GO:0005506//iron ion binding;GO:0016491//oxidoreductase activity	GO:0006633//fatty acid biosynthetic process;GO:0055114//oxidation-reduction process
PDE_09417	1313.28	423.454	4559.39	2460.09	21.4762	-5.93429	0.989589	4.02483e-179	1.94218e-175	glucoamylase Amy15A	K01178|1|0.0|1016|afm:AFUA_2G00690|glucoamylase [EC:3.2.1.3] (A)	-	GO:0004339//glucan 1,4-alpha-glucosidase activity;GO:2001070//starch binding;GO:0004339//glucan 1,4-alpha-glucosidase activity;GO:0004339//glucan 1,4-alpha-glucosidase activity;GO:0004339//glucan 1,4-alpha-glucosidase activity;GO:0004339//glucan 1,4-alpha-glucosidase activity;GO:0004339//glucan 1,4-alpha-glucosidase activity;GO:0004339//glucan 1,4-alpha-glucosidase activity;GO:0004339//glucan 1,4…	GO:0005976//polysaccharide metabolic process;GO:0005976//polysaccharide metabolic process;GO:0005976//polysaccharide metabolic process;GO:0005976//polysaccharide metabolic process;GO:0005976//polysaccharide metabolic process;GO:0005976//polysaccharide metabolic process;GO:0005976//polysaccharide metabolic process;GO:0005976//polysaccharide metabolic process;GO:0005976//polysaccharide metabolic pr…
PDE_09430	95.6994	52.1615	34.3677	25.5489	45.8806	-1.06062	0.895577	0.000332768	0.0030557	hypothetical protein	-	-	-	-
PDE_09442	44.4364	25.1208	23.5347	8.63937	15.8714	-1.48531	0.886978	2.84135e-06	4.73607e-05	hypothetical protein	-	-	-	-
PDE_09443	223.602	130.225	403.791	308.297	97.2027	-1.20186	0.925982	1.38799e-06	2.49917e-05	hypothetical protein	K02930|1|0.0|630|ang:ANI_1_1460084|large subunit ribosomal protein L4e (A)	GO:0005840//ribosome	GO:0003735//structural constituent of ribosome	GO:0006412//translation
PDE_09452	123.249	67.3003	409.677	123.122	23.7018	-2.37851	0.946701	1.25161e-28	3.17877e-26	hypothetical protein	-	-	-	-
PDE_09456	295.507	184.505	298.467	163.604	122.167	-1.27434	0.932577	1.68373e-07	3.5936e-06	hypothetical protein	K16948|1|0.0|765|pcs:Pc21g16350|cell division control protein 12 (A)	-	GO:0005525//GTP binding	GO:0007049//cell cycle
PDE_09521	129.988	83.5206	193.963	55.633	44.425	-1.54893	0.932284	1.74884e-11	8.43901e-10	hypothetical protein	-	-	-	-
PDE_09532	68.3756	25.5114	20.829	13.8277	24.5264	-1.47915	0.909959	1.99633e-10	7.66368e-09	putative chitinase	K01183|1|4e-133|425|pcs:Pc22g13690|chitinase [EC:3.2.1.14] (A)	-	GO:0004553//hydrolase activity, hydrolyzing O-glycosyl compounds;GO:0004553//hydrolase activity, hydrolyzing O-glycosyl compounds	GO:0005975//carbohydrate metabolic process;GO:0005975//carbohydrate metabolic process
PDE_09553	120.094	113.326	151.16	144.96	51.8091	-1.21289	0.915001	0.000188301	0.00190093	hypothetical protein	K11130|1|5e-34|114|nfi:NFIA_038110|H/ACA ribonucleoprotein complex subunit 3 (A)	-	-	-
PDE_09556	40.8952	27.6673	46.7176	50.5868	19.0751	-1.10024	0.851894	0.000872259	0.00683486	hypothetical protein	-	-	-	-
PDE_09561	33.3022	27.549	33.4268	21.075	15.8239	-1.07351	0.830623	0.000213002	0.00210193	hypothetical protein	K01852|1|0.0|1351|nfi:NFIA_038030|lanosterol synthase [EC:5.4.99.7] (A)	-	-	-
PDE_09568	25.7544	16.9929	65.6067	15.333	10.5298	-1.29035	0.826151	4.47018e-07	8.87689e-06	hypothetical protein	-	-	-	-
PDE_09571	40.4734	31.3239	28.7556	33.2992	15.3728	-1.39659	0.876705	2.83801e-05	0.00036963	hypothetical protein	K03685|1|1e-15|73.9|afv:AFLA_056830|ribonuclease III [EC:3.1.26.3] (A)	-	-	-
PDE_09589	36.5411	35.6554	22.2609	20.0692	16.7515	-1.12523	0.845437	0.000134506	0.00143414	hypothetical protein	-	-	-	-
PDE_09594	139.852	78.5395	279.677	98.9436	52.1058	-1.42439	0.928796	1.84001e-09	5.76557e-08	hypothetical protein	K10956|1|0.0|952|pcs:Pc22g15970|protein transport protein SEC61 subunit alpha (A)	-	-	-
PDE_09599	66.9667	49.2869	32.2027	31.2085	30.4495	-1.13703	0.888325	2.90825e-05	0.000375736	hypothetical protein	-	-	-	-
PDE_09605	34.0717	30.4116	55.4506	40.6416	14.1894	-1.26376	0.851929	1.68069e-06	2.93847e-05	hypothetical protein	-	-	-	-
PDE_09637	32.3501	15.8393	36.59	12.7749	10.8447	-1.57678	0.869039	2.44925e-09	7.5914e-08	hypothetical protein	-	-	-	-
PDE_09645	29.8882	20.6549	26.6696	47.219	13.938	-1.10056	0.821783	0.00199084	0.0136073	hypothetical protein	K01772|1|0.0|744|pcs:Pc22g15520|ferrochelatase [EC:4.99.1.1] (A)	-	-	-
PDE_09715	2374.91	1355.35	5221.5	1622.02	509.159	-2.22169	0.964415	3.90576e-28	8.97488e-26	hypothetical protein	-	-	-	-
PDE_09728	299.381	202.252	632.442	364.981	149.602	-1.00086	0.911444	0.000768709	0.00615158	hypothetical protein	K02908|1|2e-69|206|pcs:Pc21g18200|large subunit ribosomal protein L30e (A)	-	-	-
PDE_09735	149.478	161.258	73.8129	115.857	57.6115	-1.3755	0.928261	3.65564e-08	9.00014e-07	hypothetical protein	K03521|1|8e-164|457|pcs:Pc21g18110|electron transfer flavoprotein beta subunit (A)	-	-	-
PDE_09756	219.718	303.059	25.3777	38.8834	39.9892	-2.45797	0.95504	1.87163e-10	7.25424e-09	hypothetical protein	K01969|1|0.0|1049|pcs:Pc21g01110|3-methylcrotonyl-CoA carboxylase beta subunit [EC:6.4.1.4] (A)	-	-	-
PDE_09757	217.832	336.39	20.3554	28.5112	37.2074	-2.54956	0.95561	6.50434e-16	5.45855e-14	hypothetical protein	K00253|1|0.0|784|pcs:Pc21g01100|isovaleryl-CoA dehydrogenase [EC:1.3.8.4] (A)	-	-	-
PDE_09769	175.017	238.391	24.6722	44.8029	43.372	-2.01266	0.947788	3.32963e-08	8.34655e-07	hypothetical protein	K01968|1|0.0|1219|pcs:Pc21g01060|3-methylcrotonyl-CoA carboxylase alpha subunit [EC:6.4.1.4] (A)	-	-	-
PDE_09785	70.568	57.2913	29.6357	28.6192	33.9888	-1.05395	0.882455	0.000639713	0.00531772	hypothetical protein	-	-	-	-
PDE_09810	21.3128	16.2914	34.9366	24.6153	5.23788	-2.02467	0.847923	1.57087e-07	3.37349e-06	hypothetical protein	K00641|1|0.0|867|pcs:Pc22g16570|homoserine O-acetyltransferase [EC:2.3.1.31] (A)	-	-	-
PDE_09818	229.333	137.463	239.853	134.899	99.1362	-1.20996	0.926897	1.22208e-06	2.22534e-05	hypothetical protein	K16945|1|0.0|700|nfi:NFIA_078740|cell division control protein 11 (A)	-	-	-
PDE_09830	45.4481	31.4251	128.17	35.2248	15.1754	-1.58248	0.893556	2.38135e-08	6.04283e-07	hypothetical protein	-	-	-	-
PDE_09831	214.058	159.739	135.939	73.9981	102.03	-1.06901	0.916641	8.51366e-05	0.000964382	hypothetical protein	-	-	-	-
PDE_09832	12292.9	7305.12	27678.8	8269.59	2117.16	-2.53762	0.96723	1.14022e-22	1.69297e-20	hypothetical protein	-	-	-	-
PDE_09871	49.6693	35.9723	79.67	22.4404	24.5697	-1.01548	0.855675	0.000614357	0.00516028	hypothetical protein	-	-	-	-
PDE_09872	51.3132	38.1094	89.5668	23.5251	25.2854	-1.02102	0.858006	0.00436164	0.025952	hypothetical protein	-	-	-	-
PDE_09875	84.2825	47.3239	104.616	35.5049	33.3739	-1.33651	0.910926	1.68677e-07	3.5936e-06	hypothetical protein	K10246|1|0.0|594|pcs:Pc21g18830|fatty acid elongase 3 [EC:2.3.1.199] (A)	-	-	-
PDE_09900	6922.5	3712.17	4547.06	3674.37	2342.98	-1.56295	0.954073	9.78565e-13	5.65517e-11	hypothetical protein	K18278|1|0.0|644|pcs:Pc21g15700|pyrimidine precursor biosynthesis enzyme (A)	-	-	-
PDE_09910	154.312	92.1298	381.083	50.1162	42.2653	-1.86831	0.943351	1.3141e-16	1.16352e-14	hypothetical protein	K01003|5|3e-98|292|afm:AFUA_5G07230|carboxyvinyl-carboxyphosphonate phosphorylmutase [EC:2.7.8.23] (A)	-	-	-
PDE_09911	74.6488	42.4998	142.437	24.2637	23.3369	-1.67751	0.921285	7.92684e-13	4.63648e-11	hypothetical protein	K00480|2|1e-70|233|spaa:SPAPADRAFT_64670|salicylate hydroxylase [EC:1.14.13.1] (A)	-	-	-
PDE_09928	31.5735	19.3115	24.0461	15.7669	15.1495	-1.05944	0.82199	0.00810388	0.0425751	hypothetical protein	-	-	-	-
PDE_09953	144.139	122.112	169.432	114.707	70.8502	-1.02461	0.902172	0.000581958	0.00493973	hypothetical protein	-	-	-	-
PDE_09965	29.8884	17.9901	35.1982	32.9491	14.0308	-1.09099	0.820781	0.000509213	0.00441944	hypothetical protein	K10756|1|0.0|711|pcs:Pc21g14450|replication factor C subunit 3/5 (A)	-	-	-
PDE_09986	133.359	195.032	78.2024	44.4979	63.4527	-1.07156	0.907663	0.00017302	0.0017764	hypothetical protein	-	-	-	-
PDE_09994	221.448	149.866	162.686	132.544	107.908	-1.03717	0.914172	0.000159738	0.00165411	hypothetical protein	K08141|1|0.0|981|afm:AFUA_4G00150|MFS transporter, SP family, general alpha glucoside:H+ symporter (A)	-	-	-
PDE_10000	59.8368	32.9429	95.4147	30.1671	12.6797	-2.23852	0.92536	1.03863e-18	1.12627e-16	hypothetical protein	K18387|2|4e-44|152|afv:AFLA_045510|paspaline synthase (A)	-	-	-
PDE_10001	26.3071	12.1808	80.4951	18.8656	4.74576	-2.47074	0.880106	6.80466e-17	6.25445e-15	hypothetical protein	K00804|1|1e-141|407|nfi:NFIA_096070|geranylgeranyl diphosphate synthase, type III [EC:2.5.1.1 2.5.1.10 2.5.1.29] (A)	-	-	-
PDE_10002	36.487	21.5206	83.2802	21.2584	7.98332	-2.19232	0.898874	3.88884e-15	2.93213e-13	hypothetical protein	-	-	-	-
PDE_10003	43.4301	23.1459	90.243	19.6167	7.26379	-2.5799	0.915708	6.37506e-17	5.91593e-15	hypothetical protein	-	-	-	-
PDE_10005	21.9814	12.1716	142.981	35.813	2.73757	-3.00531	0.872734	6.40168e-24	1.0839e-21	hypothetical protein	-	-	-	-
PDE_10007	26.5139	11.8896	116.412	34.0071	3.79928	-2.80295	0.886098	2.04587e-28	4.93618e-26	hypothetical protein	-	-	-	-
PDE_10009	24.8022	8.899	199.953	31.5142	2.64034	-3.23167	0.885925	2.46038e-25	4.84594e-23	hypothetical protein	K17825|2|3e-54|182|ure:UREG_04217|verruculogen synthase [EC:1.14.11.38] (A)	-	-	-

## Sheet: Group_1 195 genes
GeneID	Means (Wild-type on Cellulose)	Means (ΔclrB on Cellulose)	Means (ΔcreA on Cellulose)	Means (ΔcreA-ΔclrB on Cellulose)	Means (ΔamyR on Cellulose)	log2Ratio(ΔamyR/Wild-type)	Probability (ΔamyR/Wild-type)	P-value (ΔamyR/Wild-type)	FDR (ΔamyR/Wild-type)	Description	KEGG Orthology	GO Component	GO Function	GO Process
PDE_00008	183.845	69.4866	329.994	296.742	26.9244	-2.7715	0.955126	4.96966e-08	1.18133e-06	hypothetical protein	K01735|1|0.0|767|act:ACLA_055850|3-dehydroquinate synthase [EC:4.2.3.4] (A)	-	-	-
PDE_00009	124.298	55.0116	97.5749	137.073	33.9932	-1.87049	0.939535	1.55412e-10	6.0724e-09	hypothetical protein	K00545|1|1e-157|444|act:ACLA_055840|catechol O-methyltransferase [EC:2.1.1.6] (A)	-	GO:0016206//catechol O-methyltransferase activity;GO:0008171//O-methyltransferase activity	-
PDE_00021	3297.4	2460.9	4854.75	1592.5	1024.37	-1.68659	0.957302	2.97991e-15	2.33814e-13	hypothetical protein	-	GO:0009277//fungal-type cell wall;GO:0009277//fungal-type cell wall	GO:0005199//structural constituent of cell wall;GO:0005199//structural constituent of cell wall	-
PDE_00080	37.716	32.3805	60.0235	25.0641	14.9882	-1.33135	0.865931	1.78282e-05	0.000247568	hypothetical protein	-	-	-	-
PDE_00081	50.8009	47.2658	89.4533	33.7342	16.8625	-1.59104	0.900722	5.41949e-11	2.35601e-09	hypothetical protein	-	-	GO:0003824//catalytic activity	GO:0008152//metabolic process
PDE_00232	2193.27	1609.64	1914.43	2357.72	975.724	-1.16854	0.936842	3.27872e-06	5.37232e-05	hypothetical protein	K11254|1|5e-67|200|afv:AFLA_017620|histone H4 (A)	GO:0000786//nucleosome;GO:0005634//nucleus;GO:0000786//nucleosome;GO:0005634//nucleus;GO:0005634//nucleus;GO:0000786//nucleosome;GO:0005634//nucleus;GO:0000786//nucleosome;GO:0005634//nucleus;GO:0000786//nucleosome;GO:0005634//nucleus;GO:0000786//nucleosome;GO:0005634//nucleus;GO:0000786//nucleosome;GO:0005634//nucleus;GO:0000786//nucleosome;GO:0005634//nucleus	GO:0003677//DNA binding;GO:0003677//DNA binding;GO:0003677//DNA binding;GO:0003677//DNA binding;GO:0003677//DNA binding;GO:0003677//DNA binding;GO:0003677//DNA binding;GO:0003677//DNA binding;GO:0003677//DNA binding	GO:0006334//nucleosome assembly;GO:0006334//nucleosome assembly;GO:0006352//DNA-templated transcription, initiation;GO:0006334//nucleosome assembly;GO:0006334//nucleosome assembly;GO:0006334//nucleosome assembly;GO:0006334//nucleosome assembly;GO:0006334//nucleosome assembly;GO:0006334//nucleosome assembly
PDE_00404	38.7927	36.7716	55.6267	64.193	14.4387	-1.42585	0.874771	3.55165e-08	8.78896e-07	hypothetical protein	K01649|1|0.0|1139|pcs:Pc21g23240|2-isopropylmalate synthase [EC:2.3.3.13] (A)	-	GO:0003852//2-isopropylmalate synthase activity;GO:0046912//transferase activity, transferring acyl groups, acyl groups converted into alkyl on transfer;GO:0046912//transferase activity, transferring acyl groups, acyl groups converted into alkyl on transfer;GO:0003824//catalytic activity;GO:0003852//2-isopropylmalate synthase activity;GO:0003824//catalytic activity;GO:0003852//2-isopropylmalate s…	GO:0009098//leucine biosynthetic process;GO:0019752//carboxylic acid metabolic process;GO:0019752//carboxylic acid metabolic process;GO:0009098//leucine biosynthetic process;GO:0009098//leucine biosynthetic process;GO:0009098//leucine biosynthetic process
PDE_00444	216.525	202.927	232.352	465.649	82.6141	-1.39008	0.935115	0.000799606	0.00637242	hypothetical protein	K15102|1|0.0|523|pcs:Pc06g01110|solute carrier family 25 (mitochondrial phosphate transporter), member 3 (A)	-	-	GO:0055085//transmembrane transport;GO:0055085//transmembrane transport;GO:0055085//transmembrane transport;GO:0055085//transmembrane transport;GO:0055085//transmembrane transport
PDE_00542	26.1587	15.1155	110.749	33.8339	11.4406	-1.19313	0.817984	0.000200542	0.00199735	hypothetical protein	K00052|1|0.0|679|afv:AFLA_083640|3-isopropylmalate dehydrogenase [EC:1.1.1.85] (A)	GO:0005737//cytoplasm	GO:0003862//3-isopropylmalate dehydrogenase activity;GO:0000287//magnesium ion binding;GO:0016616//oxidoreductase activity, acting on the CH-OH group of donors, NAD or NADP as acceptor;GO:0051287//NAD binding;GO:0016616//oxidoreductase activity, acting on the CH-OH group of donors, NAD or NADP as acceptor	GO:0009098//leucine biosynthetic process;GO:0055114//oxidation-reduction process;GO:0055114//oxidation-reduction process;GO:0055114//oxidation-reduction process
PDE_00552	108.497	47.2079	533.591	75.7936	29.2532	-1.89099	0.93736	1.63977e-12	9.04311e-11	hypothetical protein	-	-	-	-
PDE_00608	30.5384	17.9395	27.1464	16.1703	14.6815	-1.05663	0.818416	0.0013012	0.00965993	hypothetical protein	-	-	-	-
PDE_00723	87.5255	67.517	115.126	110.926	39.3755	-1.15241	0.900601	1.77209e-05	0.000246779	hypothetical protein	K02358|1|0.0|813|pcs:Pc12g15010|elongation factor Tu (A)	GO:0005622//intracellular	GO:0003924//GTPase activity;GO:0005525//GTP binding;GO:0003924//GTPase activity;GO:0005525//GTP binding;GO:0003924//GTPase activity;GO:0005525//GTP binding;GO:0003924//GTPase activity;GO:0005525//GTP binding;GO:0003924//GTPase activity;GO:0005525//GTP binding;GO:0003746//translation elongation factor activity;GO:0005525//GTP binding;GO:0005525//GTP binding;GO:0003924//GTPase activity;GO:0005525//…	GO:0006414//translational elongation
PDE_00734	35.0012	23.937	34.7165	61.3965	13.0619	-1.42204	0.866225	0.000122208	0.00132366	hypothetical protein	K02990|3|4e-76|224|nfi:NFIA_013450|small subunit ribosomal protein S6 (A)	GO:0005840//ribosome;GO:0005840//ribosome	GO:0003735//structural constituent of ribosome;GO:0019843//rRNA binding;GO:0003735//structural constituent of ribosome;GO:0019843//rRNA binding	GO:0006412//translation;GO:0006412//translation
PDE_00748	37.3538	30.3396	42.6664	38.5843	17.6966	-1.07778	0.841673	0.000525329	0.00454001	hypothetical protein	K07008|1|0.0|659|pcs:Pc12g15200|glutamine amidotransferase (A)	-	-	-
PDE_00768	107.604	91.5662	110.271	128.217	53.6703	-1.00354	0.891191	0.00221431	0.0148405	hypothetical protein	K17769|1|5e-78|231|pcs:Pc13g10830|mitochondrial import receptor subunit TOM22 (A)	GO:0005741//mitochondrial outer membrane	-	GO:0006886//intracellular protein transport
PDE_00789	29.2276	19.3347	64.6137	13.4804	7.58776	-1.94559	0.876066	4.33628e-13	2.6124e-11	hypothetical protein	K01932|1|0.0|674|afm:AFUA_6G12080|[EC:6.3.2.-] (A)	-	GO:0003824//catalytic activity	GO:0008152//metabolic process
PDE_00790	76.9297	43.6914	157.45	53.9538	14.759	-2.38194	0.935633	4.2983e-24	7.40765e-22	hypothetical protein	-	-	-	-
PDE_00792	62.7055	30.7868	132.536	25.0142	9.23416	-2.76354	0.932473	3.29191e-24	5.7764e-22	hypothetical protein	-	-	-	-
PDE_00794	80.929	41.8272	373.534	63.2889	11.4527	-2.82097	0.941417	6.77484e-35	2.61536e-32	hypothetical protein	-	-	-	-
PDE_00795	19.7546	10.3878	62.779	10.8646	3.34035	-2.56412	0.854139	4.72766e-21	6.33703e-19	hypothetical protein	-	-	-	-
PDE_00796	24.0306	12.1325	97.704	19.6049	2.95677	-3.02278	0.880642	3.31563e-18	3.44077e-16	hypothetical protein	-	-	-	-
PDE_00797	115.49	71.1906	211.604	70.7701	28.4638	-2.02057	0.940934	8.32908e-21	1.08627e-18	hypothetical protein	-	-	GO:0050364;GO:0050364	GO:0009820//alkaloid metabolic process;GO:0009820//alkaloid metabolic process
PDE_00798	96.6865	52.0881	155.45	55.7066	19.255	-2.32808	0.941158	2.82368e-18	2.9621e-16	hypothetical protein	-	-	-	-
PDE_00799	56.2838	39.294	132.638	42.8457	20.562	-1.45274	0.899461	4.96647e-08	1.18133e-06	hypothetical protein	-	-	-	-
PDE_00800	18.8735	16.4026	48.2646	15.2872	6.81031	-1.47057	0.803861	0.000109965	0.00121011	hypothetical protein	-	-	GO:0016491//oxidoreductase activity;GO:0016491//oxidoreductase activity;GO:0016491//oxidoreductase activity;GO:0016491//oxidoreductase activity	GO:0008152//metabolic process;GO:0008152//metabolic process;GO:0008152//metabolic process;GO:0008152//metabolic process
PDE_00803	22.1567	14.2967	57.808	10.3105	3.28311	-2.75461	0.869661	1.55128e-11	7.52333e-10	hypothetical protein	-	-	-	-
PDE_00804	24.533	13.0327	61.9882	11.5816	2.3837	-3.36345	0.88627	1.35799e-28	3.36051e-26	hypothetical protein	-	-	-	-
PDE_00805	40.13	20.6855	101.4	19.4741	4.10915	-3.28777	0.918799	3.13234e-30	8.6372e-28	hypothetical protein	-	-	-	-
PDE_00806	51.3934	30.7441	170.807	28.0148	6.11527	-3.0711	0.92852	9.22655e-32	2.78267e-29	hypothetical protein	-	-	-	-
PDE_00807	25.9765	10.924	64.7445	12.1404	2.72727	-3.25168	0.889792	2.07484e-31	6.06796e-29	hypothetical protein	-	-	GO:0050364;GO:0050364	GO:0009820//alkaloid metabolic process;GO:0009820//alkaloid metabolic process
PDE_00808	26.2006	13.9542	66.6801	10.7489	4.46901	-2.55158	0.88128	3.3071e-23	5.14787e-21	hypothetical protein	-	-	GO:0005506//iron ion binding;GO:0016705//oxidoreductase activity, acting on paired donors, with incorporation or reduction of molecular oxygen;GO:0020037//heme binding;GO:0005506//iron ion binding;GO:0016705//oxidoreductase activity, acting on paired donors, with incorporation or reduction of molecular oxygen;GO:0020037//heme binding;GO:0005506//iron ion binding;GO:0016705//oxidoreductase activit…	GO:0055114//oxidation-reduction process;GO:0055114//oxidation-reduction process;GO:0055114//oxidation-reduction process;GO:0055114//oxidation-reduction process;GO:0055114//oxidation-reduction process;GO:0055114//oxidation-reduction process;GO:0055114//oxidation-reduction process;GO:0055114//oxidation-reduction process;GO:0055114//oxidation-reduction process;GO:0055114//oxidation-reduction process
PDE_00811	37.5275	21.9563	64.5524	16.5387	10.6849	-1.81237	0.890811	1.60845e-13	1.06323e-11	hypothetical protein	K18389|1|4e-134|401|afv:AFLA_045500|cytochrome P450 monooxygenase [EC:1.14.13.-] (A)	-	GO:0005506//iron ion binding;GO:0016705//oxidoreductase activity, acting on paired donors, with incorporation or reduction of molecular oxygen;GO:0020037//heme binding;GO:0005506//iron ion binding;GO:0016705//oxidoreductase activity, acting on paired donors, with incorporation or reduction of molecular oxygen;GO:0020037//heme binding;GO:0005506//iron ion binding;GO:0016705//oxidoreductase activit…	GO:0055114//oxidation-reduction process;GO:0055114//oxidation-reduction process;GO:0055114//oxidation-reduction process;GO:0055114//oxidation-reduction process;GO:0055114//oxidation-reduction process;GO:0055114//oxidation-reduction process;GO:0055114//oxidation-reduction process
PDE_00857	78.6694	48.1669	81.8466	41.4613	35.9407	-1.13018	0.895162	2.78705e-05	0.000364469	hypothetical protein	-	-	-	GO:0008610//lipid biosynthetic process
PDE_00860	39.9353	34.1472	40.5311	66.972	17.5954	-1.18247	0.857782	0.0221001	0.0909545	hypothetical protein	K17805|1|5e-80|237|afm:AFUA_7G04150|mitochondrial import inner membrane translocase subunit TIM16 (A)	-	-	-
PDE_00917	41.423	27.8789	69.8149	24.0075	19.3758	-1.09618	0.852636	6.62448e-05	0.000775885	putative Dol-PP-alpha-oligosaccharide: protein beta-oligosaccharyltransferase	K07151|1|0.0|1387|pcs:Pc21g05240|dolichyl-diphosphooligosaccharide--protein glycosyltransferase [EC:2.4.99.18] (A)	GO:0016020//membrane	GO:0004576//oligosaccharyl transferase activity	GO:0006486//protein glycosylation
PDE_00924	65.6485	72.9886	158.856	61.3177	32.2826	-1.02401	0.87339	0.000473031	0.00415398	hypothetical protein	-	-	-	-
PDE_01065	81.3708	41.9704	369.326	102.982	12.2152	-2.73583	0.940744	4.26761e-32	1.37289e-29	hypothetical protein	-	-	GO:0008168//methyltransferase activity	GO:0008152//metabolic process
PDE_01066	128.578	74.8873	304.163	115.368	25.1122	-2.35618	0.947201	2.70703e-28	6.37209e-26	hypothetical protein	K14133|1|0.0|613|pcs:Pc21g15430|cyclic dipeptide N-dimethylallyltransferase [EC:2.5.1.-] (A)	-	GO:0050364;GO:0050364	GO:0009820//alkaloid metabolic process;GO:0009820//alkaloid metabolic process
PDE_01068	37.3001	20.6407	177.205	64.1583	5.95998	-2.6458	0.907732	7.58514e-27	1.66373e-24	hypothetical protein	-	-	GO:0016491//oxidoreductase activity;GO:0016491//oxidoreductase activity;GO:0016491//oxidoreductase activity;GO:0016491//oxidoreductase activity	GO:0008152//metabolic process;GO:0008152//metabolic process;GO:0008152//metabolic process;GO:0008152//metabolic process
PDE_01069	30.7237	13.8033	180.043	45.9408	5.83621	-2.39625	0.891485	2.73451e-12	1.48262e-10	hypothetical protein	-	-	GO:0008171//O-methyltransferase activity	-
PDE_01073	40.8026	24.3132	138.306	41.686	11.2578	-1.85774	0.897355	5.14608e-07	1.00945e-05	hypothetical protein	-	-	-	-
PDE_01119	25.5471	14.5413	31.3861	11.3044	10.9673	-1.21995	0.818312	0.000429689	0.00381854	hypothetical protein	K17623|2|7e-68|225|ure:UREG_02228|pseudouridine-5'-monophosphatase [EC:3.1.3.-] (A)	-	-	-
PDE_01156	35.5939	24.4727	36.2148	39.853	16.1421	-1.1408	0.844401	0.0001962	0.00196628	hypothetical protein	K02996|2|3e-153|435|act:ACLA_096200|small subunit ribosomal protein S9 (A)	GO:0005840//ribosome;GO:0005840//ribosome	GO:0003735//structural constituent of ribosome;GO:0003735//structural constituent of ribosome	GO:0006412//translation;GO:0006412//translation
PDE_01201	291.081	118.652	1329.54	355.304	1.62425	-7.4855	0.991264	2.25092e-84	4.34473e-81	alpha-amylase Amy13A	K01176|1|0.0|965|pcs:Pc16g00630|alpha-amylase [EC:3.2.1.1] (A)	-	GO:0003824//catalytic activity;GO:0043169//cation binding;GO:2001070//starch binding;GO:0003824//catalytic activity;GO:0043169//cation binding;GO:2001070//starch binding;GO:0004556//alpha-amylase activity;GO:0005509//calcium ion binding;GO:2001070//starch binding	GO:0005975//carbohydrate metabolic process;GO:0005975//carbohydrate metabolic process;GO:0016052//carbohydrate catabolic process
PDE_01206	40.2644	37.5013	48.7797	102.782	19.8033	-1.02376	0.838945	0.0188561	0.0808799	hypothetical protein	-	-	-	-
PDE_01354	1102.01	171.274	4893.05	1130.97	17.3218	-5.9914	0.989606	1.66591e-101	4.01943e-98	starch binding domain- and chitin binding domain-containing protein	-	GO:0019028//viral capsid	GO:2001070//starch binding;GO:2001070//starch binding;GO:2001070//starch binding	-
PDE_01358	362.545	253.551	990.996	545.078	148.699	-1.28577	0.935892	1.57155e-07	3.37349e-06	hypothetical protein	-	-	-	-
PDE_01368	107.459	60.0254	120.985	62.2599	36.5465	-1.55598	0.92795	5.09616e-11	2.22548e-09	hypothetical protein	K00559|1|0.0|712|pcs:Pc12g14840|sterol 24-C-methyltransferase [EC:2.1.1.41] (A)	-	GO:0008168//methyltransferase activity;GO:0008168//methyltransferase activity;GO:0003838//sterol 24-C-methyltransferase activity	GO:0006694//steroid biosynthetic process;GO:0008152//metabolic process
PDE_01405	105.978	84.8032	144.77	77.8243	37.3485	-1.50464	0.925049	2.56536e-09	7.83677e-08	hypothetical protein	-	-	GO:0008080//N-acetyltransferase activity;GO:0008080//N-acetyltransferase activity	-
PDE_01489	1710.31	1346.63	1474.4	1990.74	829.888	-1.04327	0.927984	9.41979e-05	0.00105956	hypothetical protein	K11252|1|1e-91|265|ang:ANI_1_1488094|histone H2B (A)	GO:0000786//nucleosome;GO:0005634//nucleus;GO:0000786//nucleosome;GO:0005634//nucleus;GO:0000786//nucleosome;GO:0005634//nucleus;GO:0000786//nucleosome;GO:0005634//nucleus;GO:0000786//nucleosome;GO:0005634//nucleus;GO:0000786//nucleosome;GO:0005634//nucleus;GO:0000786//nucleosome;GO:0005634//nucleus	GO:0003677//DNA binding;GO:0003677//DNA binding;GO:0003677//DNA binding;GO:0003677//DNA binding;GO:0003677//DNA binding;GO:0003677//DNA binding;GO:0003677//DNA binding;GO:0003677//DNA binding	GO:0006334//nucleosome assembly;GO:0006334//nucleosome assembly;GO:0006334//nucleosome assembly;GO:0006334//nucleosome assembly;GO:0006334//nucleosome assembly;GO:0006334//nucleosome assembly;GO:0006334//nucleosome assembly
PDE_01490	1222.47	850.76	1258.47	1538.59	482.801	-1.3403	0.944456	1.35215e-08	3.59492e-07	hypothetical protein	K11251|1|6e-88|255|ang:ANI_1_1484094|histone H2A (A)	GO:0000786//nucleosome;GO:0005634//nucleus;GO:0000786//nucleosome;GO:0005634//nucleus;GO:0000786//nucleosome;GO:0005634//nucleus;GO:0000786//nucleosome;GO:0005634//nucleus;GO:0000786//nucleosome;GO:0005634//nucleus;GO:0000786//nucleosome;GO:0005634//nucleus;GO:0000786//nucleosome;GO:0005634//nucleus	GO:0003677//DNA binding;GO:0003677//DNA binding;GO:0003677//DNA binding;GO:0003677//DNA binding;GO:0003677//DNA binding;GO:0003677//DNA binding;GO:0003677//DNA binding;GO:0003677//DNA binding	GO:0006334//nucleosome assembly;GO:0006334//nucleosome assembly;GO:0006334//nucleosome assembly;GO:0006334//nucleosome assembly;GO:0006334//nucleosome assembly;GO:0006334//nucleosome assembly;GO:0006334//nucleosome assembly
PDE_01495	38.6073	28.7808	79.707	34.1594	16.6572	-1.21273	0.858749	1.1735e-05	0.00017212	hypothetical protein	K09523|1|0.0|779|pcs:Pc20g08540|DnaJ homolog subfamily C member 3 (A)	-	GO:0005515//protein binding;GO:0005515//protein binding;GO:0005515//protein binding;GO:0005515//protein binding;GO:0005515//protein binding;GO:0005515//protein binding;GO:0005515//protein binding;GO:0005515//protein binding;GO:0005515//protein binding;GO:0005515//protein binding;GO:0005515//protein binding;GO:0005515//protein binding;GO:0005515//protein binding	-
PDE_01556	60.4524	28.5262	217.645	28.93	15.0848	-2.0027	0.921665	1.71407e-19	1.99308e-17	hypothetical protein	-	GO:0005737//cytoplasm	GO:0016841//ammonia-lyase activity;GO:0016841//ammonia-lyase activity;GO:0016841//ammonia-lyase activity	GO:0009058//biosynthetic process;GO:0006559//L-phenylalanine catabolic process
PDE_01576	109.031	72.5313	233.138	124.082	50.6791	-1.10528	0.903968	0.000233762	0.00226965	hypothetical protein	K00958|1|0.0|1076|pcs:Pc20g07710|sulfate adenylyltransferase [EC:2.7.7.4] (A)	-	GO:0004781//sulfate adenylyltransferase (ATP) activity;GO:0004020//adenylylsulfate kinase activity;GO:0005524//ATP binding;GO:0004781//sulfate adenylyltransferase (ATP) activity;GO:0004020//adenylylsulfate kinase activity;GO:0005524//ATP binding	GO:0000103//sulfate assimilation;GO:0000103//sulfate assimilation;GO:0000103//sulfate assimilation;GO:0000096//sulfur amino acid metabolic process
PDE_01650	26.4605	17.6618	68.8603	41.9037	9.52602	-1.47389	0.843278	1.49918e-07	3.24409e-06	hypothetical protein	K01755|1|0.0|886|act:ACLA_035720|argininosuccinate lyase [EC:4.3.2.1] (A)	-	GO:0003824//catalytic activity;GO:0004056//argininosuccinate lyase activity;GO:0004056//argininosuccinate lyase activity	GO:0042450//arginine biosynthetic process via ornithine;GO:0042450//arginine biosynthetic process via ornithine
PDE_01658	29.0128	21.5283	29.1926	27.2465	14.3611	-1.01452	0.804914	0.00129744	0.00964686	putative Dol-P-Glc: alpha-1,3-glucosyltransferase	K03848|1|0.0|915|nfi:NFIA_069450|alpha-1,3-glucosyltransferase [EC:2.4.1.267] (A)	GO:0005789//endoplasmic reticulum membrane;GO:0005789//endoplasmic reticulum membrane	GO:0016758//transferase activity, transferring hexosyl groups;GO:0016758//transferase activity, transferring hexosyl groups	-
PDE_01674	874.916	916.717	1188.69	2435.07	432.576	-1.01619	0.921682	0.0323958	0.121466	hypothetical protein	K01535|1|0.0|1776|pcs:Pc15g01800|H+-transporting ATPase [EC:3.6.3.6] (A)	GO:0016021//integral component of membrane;GO:0016021//integral component of membrane;GO:0016021//integral component of membrane;GO:0016021//integral component of membrane;GO:0016021//integral component of membrane;GO:0016021//integral component of membrane;GO:0016021//integral component of membrane;GO:0016021//integral component of membrane;GO:0016021//integral component of membrane;GO:0016021//…	GO:0000166//nucleotide binding;GO:0046872//metal ion binding;GO:0016887//ATPase activity;GO:0019829//cation-transporting ATPase activity;GO:0019829//cation-transporting ATPase activity;GO:0019829//cation-transporting ATPase activity;GO:0019829//cation-transporting ATPase activity;GO:0019829//cation-transporting ATPase activity;GO:0019829//cation-transporting ATPase activity;GO:0019829//cation-tra…	GO:0006200//ATP catabolic process;GO:0006754//ATP biosynthetic process;GO:0006812//cation transport;GO:0006812//cation transport;GO:0006812//cation transport;GO:0006812//cation transport;GO:0006812//cation transport;GO:0006812//cation transport;GO:0006812//cation transport;GO:0006812//cation transport;GO:0006812//cation transport;GO:0006812//cation transport;GO:0006812//cation transport;GO:000681…
PDE_01763	56.1542	34.5299	106.652	34.4421	18.9129	-1.57002	0.905245	1.05251e-10	4.30416e-09	hypothetical protein	-	-	-	-
PDE_01810	231.763	172.864	386.168	172.223	107.946	-1.10235	0.919265	0.000217393	0.00213217	hypothetical protein	K07342|1|2e-43|138|pcs:Pc20g02810|protein transport protein SEC61 subunit gamma and related proteins (A)	GO:0016020//membrane;GO:0016020//membrane	GO:0015450//P-P-bond-hydrolysis-driven protein transmembrane transporter activity	GO:0006605//protein targeting;GO:0006886//intracellular protein transport;GO:0015031//protein transport
PDE_01936	32.0621	26.4405	32.9606	36.1168	15.0958	-1.08672	0.827981	0.0060238	0.0335093	hypothetical protein	-	-	-	-
PDE_02003	84.3279	72.6082	338.567	164.723	32.9635	-1.35514	0.91229	0.0012813	0.00956965	hypothetical protein	K00390|1|0.0|562|nfi:NFIA_070720|phosphoadenosine phosphosulfate reductase [EC:1.8.4.8] (A);K00397|2|0.0|562|afm:AFUA_3G06540|anaerobic dimethyl sulfoxide reductase [EC:1.8.99.-] (A)	-	GO:0003824//catalytic activity;GO:0004604//phosphoadenylyl-sulfate reductase (thioredoxin) activity;GO:0004604//phosphoadenylyl-sulfate reductase (thioredoxin) activity	GO:0008152//metabolic process;GO:0009086//methionine biosynthetic process;GO:0019344//cysteine biosynthetic process;GO:0055114//oxidation-reduction process;GO:0019379//sulfate assimilation, phosphoadenylyl sulfate reduction by phosphoadenylyl-sulfate reductase (thioredoxin);GO:0055114//oxidation-reduction process
PDE_02128	208.576	130.91	463.172	98.9017	43.967	-2.24608	0.952536	1.03358e-24	1.95589e-22	hypothetical protein	-	-	-	-
PDE_02138	26.8933	15.1999	57.7	14.2962	6.52792	-2.04255	0.871819	2.86627e-12	1.54538e-10	hypothetical protein	K00507|1|6e-99|302|tve:TRV_02235|stearoyl-CoA desaturase (delta-9 desaturase) [EC:1.14.19.1] (A)	-	-	-
PDE_02139	34.9381	19.6024	77.0131	18.7301	12.1672	-1.5218	0.87175	2.63786e-07	5.42814e-06	hypothetical protein	K07750|1|5e-67|213|aor:AOR_1_348074|methylsterol monooxygenase [EC:1.14.13.72] (A);K00540|2|2e-65|207|afm:AFUA_2G01160|[EC:1.-.-.-] (A)	-	-	-
PDE_02140	47.5846	26.2814	154.857	32.6422	8.84548	-2.42748	0.918229	1.08621e-17	1.10347e-15	hypothetical protein	-	-	-	-
PDE_02182	300.515	169.552	293.349	218.205	138.815	-1.11427	0.922632	4.33894e-05	0.000538241	hypothetical protein	-	-	-	-
PDE_02183	64.1779	36.6108	63.3913	42.6826	26.9481	-1.25189	0.894679	0.000781892	0.0062519	hypothetical protein	-	-	-	-
PDE_02315	25.3963	17.7262	20.3127	17.9238	11.0372	-1.20225	0.81586	0.00143251	0.0104499	hypothetical protein	K18532|1|9e-112|319|ani:AN8860.2|adenylate kinase [EC:2.7.4.3] (A)	-	-	-
PDE_02426	35.196	22.6106	36.6833	17.2787	14.76	-1.25372	0.854035	5.95208e-06	9.20569e-05	hypothetical protein	K00223|1|0.0|948|pcs:Pc22g11560|delta24(24(1))-sterol reductase [EC:1.3.1.71] (A)	-	-	-
PDE_02527	95.4964	63.8088	101.326	75.9603	39.3518	-1.27901	0.911547	3.18228e-07	6.47937e-06	hypothetical protein	-	-	-	-
PDE_02536	295.168	177.494	483.973	207.921	137.429	-1.10285	0.92189	0.000503348	0.00438431	hypothetical protein	-	-	-	-
PDE_02823	64.3056	40.2116	67.0068	43.1705	22.2486	-1.53123	0.909096	3.82593e-10	1.39864e-08	hypothetical protein	-	-	-	-
PDE_02829	52.607	30.4798	77.9674	40.2428	24.5204	-1.10127	0.870127	0.00106887	0.0081611	hypothetical protein	K12668|1|4e-75|225|act:ACLA_030760|oligosaccharyltransferase complex subunit epsilon (A)	GO:0008250//oligosaccharyltransferase complex;GO:0016021//integral component of membrane	GO:0004579//dolichyl-diphosphooligosaccharide-protein glycotransferase activity	-
PDE_02842	155.536	100.646	149.569	101.387	54.569	-1.5111	0.933233	8.82908e-11	3.68872e-09	hypothetical protein	K09831|1|0.0|990|pcs:Pc16g08330|C-22 sterol desaturase [EC:1.14.14.-] (A)	-	GO:0016705//oxidoreductase activity, acting on paired donors, with incorporation or reduction of molecular oxygen;GO:0005506//iron ion binding;GO:0009055//electron carrier activity;GO:0016705//oxidoreductase activity, acting on paired donors, with incorporation or reduction of molecular oxygen;GO:0020037//heme binding;GO:0004497//monooxygenase activity;GO:0005506//iron ion binding;GO:0016705//oxi…	GO:0055114//oxidation-reduction process;GO:0055114//oxidation-reduction process;GO:0055114//oxidation-reduction process;GO:0055114//oxidation-reduction process;GO:0055114//oxidation-reduction process;GO:0055114//oxidation-reduction process;GO:0055114//oxidation-reduction process;GO:0055114//oxidation-reduction process;GO:0055114//oxidation-reduction process;GO:0055114//oxidation-reduction process…
PDE_03033	48.6011	40.0539	63.7365	28.5012	21.4726	-1.17849	0.872181	0.00377773	0.0231196	hypothetical protein	-	-	-	-
PDE_03043	40.7052	30.7478	57.2495	52.0058	17.1729	-1.24508	0.865724	6.15411e-05	0.000723426	hypothetical protein	-	-	GO:0003824//catalytic activity;GO:0008081//phosphoric diester hydrolase activity;GO:0046872//metal ion binding	-
PDE_03044	816.323	483.707	2779.3	680.427	255.938	-1.67335	0.954073	1.39737e-14	1.01399e-12	hypothetical protein	-	-	-	-
PDE_03085	48.8566	33.973	45.9549	51.6647	23.0159	-1.08593	0.864429	0.000803783	0.00639514	hypothetical protein	K17428|1|1e-109|318|act:ACLA_070100|large subunit ribosomal protein L47, mitochondrial (A)	GO:0005761//mitochondrial ribosome	GO:0003735//structural constituent of ribosome	GO:0006412//translation
PDE_03214	76.8448	54.3656	89.3708	92.707	36.7173	-1.06549	0.888946	0.00287602	0.0184183	hypothetical protein	K17781|1|5e-39|129|afv:AFLA_135030|mitochondrial import inner membrane translocase subunit TIM13 (A)	-	-	-
PDE_03236	84.4591	46.8978	98.7821	43.5668	29.5978	-1.51276	0.91797	1.77521e-07	3.74891e-06	hypothetical protein	-	-	-	-
PDE_03346	120.083	80.6986	186.837	117.481	38.2309	-1.65122	0.934545	6.17282e-14	4.25528e-12	hypothetical protein	-	-	-	-
PDE_03371	115.947	84.0388	100.163	94.6522	52.4629	-1.1441	0.909147	4.91082e-05	0.000599928	hypothetical protein	K17788|1|7e-100|292|nfi:NFIA_048530|altered inheritance of mitochondria protein 13 (A)	-	-	-
PDE_03437	71.1185	12.4615	296.508	58.7658	20.3348	-1.80628	0.923374	0.00874816	0.044861	hypothetical protein	-	-	-	-
PDE_03454	34.6772	18.9588	151.657	35.9232	9.88668	-1.81043	0.885545	4.00576e-10	1.45885e-08	hypothetical protein	-	-	-	-
PDE_03505	19.0773	11.0288	24.0901	9.72077	6.0334	-1.66081	0.818726	1.43893e-09	4.64452e-08	hypothetical protein	K00155|3|0.0|967|afm:AFUA_6G03770|[EC:1.2.1.-] (A)	-	GO:0016491//oxidoreductase activity;GO:0016491//oxidoreductase activity;GO:0016491//oxidoreductase activity	GO:0008152//metabolic process;GO:0055114//oxidation-reduction process;GO:0008152//metabolic process;GO:0055114//oxidation-reduction process;GO:0008152//metabolic process;GO:0055114//oxidation-reduction process
PDE_03554	57.7506	33.915	101.841	38.4734	25.9422	-1.15453	0.881073	0.000378652	0.00342169	hypothetical protein	K00505|1|1e-164|466|pcs:Pc15g00990|tyrosinase [EC:1.14.18.1] (A)	-	GO:0016491//oxidoreductase activity;GO:0016491//oxidoreductase activity;GO:0016491//oxidoreductase activity;GO:0016491//oxidoreductase activity;GO:0016491//oxidoreductase activity;GO:0016491//oxidoreductase activity;GO:0016491//oxidoreductase activity	GO:0008152//metabolic process;GO:0008152//metabolic process;GO:0008152//metabolic process;GO:0008152//metabolic process;GO:0008152//metabolic process;GO:0008152//metabolic process;GO:0008152//metabolic process
PDE_03642	109.202	75.1541	118.375	117.717	52.069	-1.0685	0.90162	0.00013049	0.00139619	hypothetical protein	K00611|1|0.0|623|nfi:NFIA_109030|ornithine carbamoyltransferase [EC:2.1.3.3] (A)	-	GO:0016597//amino acid binding;GO:0016743//carboxyl- or carbamoyltransferase activity;GO:0016743//carboxyl- or carbamoyltransferase activity;GO:0016743//carboxyl- or carbamoyltransferase activity;GO:0016743//carboxyl- or carbamoyltransferase activity;GO:0016743//carboxyl- or carbamoyltransferase activity;GO:0016743//carboxyl- or carbamoyltransferase activity;GO:0016597//amino acid binding;GO:0016…	GO:0006520//cellular amino acid metabolic process;GO:0006520//cellular amino acid metabolic process;GO:0006520//cellular amino acid metabolic process;GO:0006520//cellular amino acid metabolic process;GO:0006520//cellular amino acid metabolic process;GO:0006520//cellular amino acid metabolic process;GO:0006520//cellular amino acid metabolic process
PDE_03657	135.175	91.8242	185.067	111.845	62.3771	-1.11574	0.911547	4.97495e-05	0.000606994	hypothetical protein	-	GO:0016021//integral component of membrane;GO:0016021//integral component of membrane	-	GO:0006810//transport;GO:0006810//transport
PDE_03760	132.04	104.054	192.511	423.372	62.3978	-1.08141	0.907922	4.77996e-05	0.000586168	hypothetical protein	K04043|1|0.0|1208|pcs:Pc22g19990|molecular chaperone DnaK (A)	-	GO:0005524//ATP binding;GO:0051082//unfolded protein binding;GO:0005524//ATP binding;GO:0051082//unfolded protein binding	GO:0006457//protein folding;GO:0006457//protein folding
PDE_03771	28.8497	15.9689	79.0738	38.6492	9.62274	-1.58404	0.859042	3.50492e-11	1.58065e-09	hypothetical protein	K01955|1|0.0|2199|pcs:Pc22g20150|carbamoyl-phosphate synthase large subunit [EC:6.3.5.5] (A)	-	GO:0005524//ATP binding;GO:0005524//ATP binding;GO:0005524//ATP binding;GO:0005524//ATP binding;GO:0005524//ATP binding;GO:0046872//metal ion binding;GO:0005524//ATP binding;GO:0046872//metal ion binding;GO:0005524//ATP binding;GO:0003824//catalytic activity;GO:0003824//catalytic activity	GO:0006807//nitrogen compound metabolic process;GO:0006807//nitrogen compound metabolic process;GO:0006807//nitrogen compound metabolic process;GO:0006807//nitrogen compound metabolic process;GO:0006807//nitrogen compound metabolic process;GO:0006807//nitrogen compound metabolic process;GO:0006807//nitrogen compound metabolic process;GO:0008152//metabolic process;GO:0008152//metabolic process;GO:…
PDE_03876	141.824	131.096	136.582	197.116	63.9646	-1.14876	0.914517	0.0023104	0.0153038	hypothetical protein	-	-	-	-
PDE_03882	14.7317	7.49669	147.78	13.5804	3.15399	-2.22368	0.810163	1.24609e-06	2.25689e-05	hypothetical protein	-	-	-	-
PDE_04039	45.0264	29.2338	73.7222	24.226	19.8469	-1.18186	0.867226	8.29521e-05	0.000945183	hypothetical protein	K01581|1|9e-121|355|abe:ARB_07853|ornithine decarboxylase [EC:4.1.1.17] (A)	-	GO:0003824//catalytic activity;GO:0003824//catalytic activity;GO:0003824//catalytic activity;GO:0003824//catalytic activity	GO:0006596//polyamine biosynthetic process;GO:0006596//polyamine biosynthetic process;GO:0006596//polyamine biosynthetic process;GO:0006596//polyamine biosynthetic process
PDE_04054	37.4962	23.7729	38.6655	21.6699	11.2211	-1.74052	0.887807	6.99922e-08	1.62379e-06	hypothetical protein	K17362|2|1e-68|207|act:ACLA_079450|acyl-coenzyme A thioesterase 13 [EC:3.1.2.-] (A)	-	-	-
PDE_04056	31.0541	25.6765	30.7572	34.684	12.7362	-1.28585	0.845972	0.000572006	0.00486811	hypothetical protein	-	-	GO:0003677//DNA binding;GO:0003713//transcription coactivator activity	GO:0006355//regulation of transcription, DNA-templated
PDE_04105	27.693	24.7977	37.6951	22.1161	10.5841	-1.38762	0.842467	1.29563e-05	0.000187187	hypothetical protein	-	-	GO:0003824//catalytic activity	GO:0008152//metabolic process
PDE_04106	132.325	103.988	173.19	94.3759	53.6083	-1.30356	0.9222	8.41885e-08	1.90728e-06	hypothetical protein	K01739|1|7e-157|461|afv:AFLA_027050|cystathionine gamma-synthase [EC:2.5.1.48] (A)	-	GO:0030170//pyridoxal phosphate binding	-
PDE_04107	31.4748	23.7745	50.8365	21.7758	14.7192	-1.0965	0.826876	0.00227848	0.0151467	hypothetical protein	-	-	-	-
PDE_04145	36.3451	28.2938	63.563	21.3278	15.9622	-1.1871	0.851169	6.14668e-05	0.000723426	hypothetical protein	K14002|1|0.0|698|pcs:Pc13g04480|DnaJ-related protein SCJ1 (A)	-	GO:0031072//heat shock protein binding;GO:0051082//unfolded protein binding;GO:0031072//heat shock protein binding;GO:0051082//unfolded protein binding	-
PDE_04150	344.904	251.342	263.278	514.063	92.6466	-1.89638	0.952968	1.8876e-08	4.89711e-07	hypothetical protein	K08141|1|0.0|737|npa:UCRNP2_7599|MFS transporter, SP family, general alpha glucoside:H+ symporter (A)	GO:0016020//membrane;GO:0016021//integral component of membrane;GO:0016020//membrane	GO:0022891//substrate-specific transmembrane transporter activity;GO:0022857//transmembrane transporter activity;GO:0005215//transporter activity	GO:0055085//transmembrane transport;GO:0055085//transmembrane transport;GO:0006810//transport;GO:0055085//transmembrane transport
PDE_04151	287.126	201.199	280.9	368.571	64.1679	-2.16176	0.954988	1.21916e-25	2.50344e-23	putative alpha-glucosidase	K01187|1|0.0|760|act:ACLA_008120|alpha-glucosidase [EC:3.2.1.20] (A);K01215|3|0.0|748|afm:AFUA_7G06380|glucan 1,6-alpha-glucosidase [EC:3.2.1.70] (A)	-	GO:0003824//catalytic activity;GO:0043169//cation binding;GO:0003824//catalytic activity;GO:0043169//cation binding	GO:0005975//carbohydrate metabolic process;GO:0005975//carbohydrate metabolic process
PDE_04220	82.3569	69.4986	121	104.094	41.1423	-1.00127	0.881419	0.000823731	0.00652695	hypothetical protein	K01738|1|0.0|707|aor:AOR_1_486134|cysteine synthase A [EC:2.5.1.47] (A)	-	-	GO:0006535//cysteine biosynthetic process from serine
PDE_04260	136.073	95.2874	365.99	106.716	29.6675	-2.19742	0.946442	7.23391e-18	7.42707e-16	hypothetical protein	K00505|4|6e-10|58.5|act:ACLA_052770|tyrosinase [EC:1.14.18.1] (A)	-	-	-
PDE_04315	111.513	88.2932	152.365	361.968	39.5811	-1.49433	0.925964	9.79688e-11	4.04059e-09	hypothetical protein	K04077|1|0.0|1082|ang:ANI_1_642104|chaperonin GroEL (A)	GO:0005737//cytoplasm;GO:0005737//cytoplasm;GO:0005737//cytoplasm;GO:0005737//cytoplasm;GO:0005737//cytoplasm;GO:0005737//cytoplasm;GO:0005737//cytoplasm;GO:0005737//cytoplasm	GO:0005524//ATP binding;GO:0005524//ATP binding	GO:0042026//protein refolding;GO:0044267//cellular protein metabolic process;GO:0006457//protein folding;GO:0042026//protein refolding;GO:0042026//protein refolding;GO:0042026//protein refolding;GO:0042026//protein refolding;GO:0042026//protein refolding;GO:0042026//protein refolding
PDE_04326	26.2365	20.1074	102.622	18.8699	10.6521	-1.30044	0.828861	0.000999154	0.00771427	hypothetical protein	K01183|3|2e-06|50.1|cmt:CCM_06535|chitinase [EC:3.2.1.14] (A)	-	-	-
PDE_04366	40.8116	27.2291	69.4129	14.6752	5.83514	-2.80614	0.915225	3.18e-17	3.06902e-15	hypothetical protein	-	-	GO:0016491//oxidoreductase activity;GO:0016491//oxidoreductase activity;GO:0016491//oxidoreductase activity;GO:0016491//oxidoreductase activity;GO:0016491//oxidoreductase activity	GO:0008152//metabolic process;GO:0008152//metabolic process;GO:0008152//metabolic process;GO:0008152//metabolic process
PDE_04403	21.2368	14.5588	98.537	18.524	8.21834	-1.36965	0.810318	1.4609e-05	0.000208259	hypothetical protein	-	-	-	-
PDE_04474	20.4669	16.168	206.429	88.9952	2.518	-3.02294	0.866173	1.74538e-07	3.69401e-06	hypothetical protein	-	-	-	-
PDE_04495	451.212	202.464	1165.81	247.727	70.8124	-2.67173	0.962395	6.78866e-40	3.63986e-37	hypothetical protein	K00059|1|2e-156|439|pcs:Pc21g16430|3-oxoacyl-[acyl-carrier protein] reductase [EC:1.1.1.100] (A)	-	GO:0016491//oxidoreductase activity;GO:0016491//oxidoreductase activity;GO:0016491//oxidoreductase activity;GO:0016491//oxidoreductase activity;GO:0016491//oxidoreductase activity	GO:0008152//metabolic process;GO:0008152//metabolic process;GO:0008152//metabolic process;GO:0008152//metabolic process
PDE_04496	204.41	75.8866	457.882	75.2694	30.6443	-2.73778	0.956162	2.32812e-35	9.36195e-33	hypothetical protein	K17740|1|2e-99|287|pcs:Pc21g16420|scytalone dehydratase [EC:4.2.1.94] (A)	-	GO:0030411	GO:0006582//melanin metabolic process
PDE_04565	107.256	62.3851	155.047	75.9615	31.4426	-1.77027	0.934096	4.44559e-14	3.08664e-12	hypothetical protein	-	-	-	-
PDE_04645	38.5563	25.863	35.9632	21.5946	18.0671	-1.0936	0.845816	0.000328851	0.00303127	hypothetical protein	K14713|1|0.0|668|pcs:Pc20g05560|solute carrier family 39 (zinc transporter), member 7 (A)	GO:0016020//membrane	GO:0046873//metal ion transmembrane transporter activity	GO:0030001//metal ion transport;GO:0055085//transmembrane transport
PDE_04650	49.9416	33.009	144.839	30.491	24.8976	-1.00424	0.853552	0.000820984	0.00651589	hypothetical protein	-	-	-	-
PDE_04665	13.599	6.86922	244.809	7.06328	0.723834	-4.80673	0.840689	3.87315e-08	9.48725e-07	hypothetical protein	-	-	-	-
PDE_04737	139.346	92.6968	195.343	100.321	69.5589	-1.00237	0.89903	0.000635777	0.00529412	putative dolichyl-phosphate beta-D-mannosyltransferase	K00721|1|1e-168|468|pcs:Pc13g10270|dolichol-phosphate mannosyltransferase [EC:2.4.1.83] (A)	-	-	-
PDE_04754	43.0521	24.7858	39.475	36.9955	17.65	-1.28641	0.87358	4.47111e-05	0.000551799	hypothetical protein	K17421|1|9e-107|307|pcs:Pc13g10070|large subunit ribosomal protein L40, mitochondrial (A)	-	-	-
PDE_04823	41.5253	38.1879	73.6273	23.5951	17.8146	-1.22093	0.865085	1.16321e-05	0.00017087	hypothetical protein	K01641|1|0.0|844|pcs:Pc18g01450|hydroxymethylglutaryl-CoA synthase [EC:2.3.3.10] (A)	-	GO:0004421//hydroxymethylglutaryl-CoA synthase activity;GO:0004421//hydroxymethylglutaryl-CoA synthase activity;GO:0004421//hydroxymethylglutaryl-CoA synthase activity;GO:0004421//hydroxymethylglutaryl-CoA synthase activity	GO:0008299//isoprenoid biosynthetic process;GO:0008299//isoprenoid biosynthetic process;GO:0008299//isoprenoid biosynthetic process;GO:0008299//isoprenoid biosynthetic process
PDE_04839	27.3028	19.4834	24.0604	14.3697	13.1241	-1.05683	0.805674	0.000200349	0.00199735	hypothetical protein	-	GO:0005622//intracellular;GO:0005622//intracellular;GO:0005622//intracellular;GO:0005622//intracellular;GO:0005622//intracellular;GO:0005622//intracellular	GO:0005085//guanyl-nucleotide exchange factor activity;GO:0005085//guanyl-nucleotide exchange factor activity;GO:0005085//guanyl-nucleotide exchange factor activity;GO:0005085//guanyl-nucleotide exchange factor activity;GO:0005085//guanyl-nucleotide exchange factor activity;GO:0005085//guanyl-nucleotide exchange factor activity	GO:0007264//small GTPase mediated signal transduction;GO:0051056//regulation of small GTPase mediated signal transduction;GO:0007264//small GTPase mediated signal transduction;GO:0051056//regulation of small GTPase mediated signal transduction;GO:0051056//regulation of small GTPase mediated signal transduction;GO:0007264//small GTPase mediated signal transduction
PDE_04921	274.35	98.7665	704.133	143.952	28.2638	-3.27899	0.961963	4.09189e-58	4.38787e-55	hypothetical protein	-	-	-	-
PDE_04989	15.8532	9.05805	31.0309	8.58388	3.81088	-2.05658	0.814393	2.54546e-12	1.38793e-10	hypothetical protein	-	GO:0016021//integral component of membrane;GO:0016020//membrane	GO:0015171//amino acid transmembrane transporter activity	GO:0006865//amino acid transport;GO:0055085//transmembrane transport;GO:0003333//amino acid transmembrane transport
PDE_05183	50.0247	33.2498	110.553	92.1528	19.8935	-1.33035	0.8857	8.90847e-07	1.67268e-05	hypothetical protein	K05824|1|0.0|658|ang:ANI_1_398134|homoisocitrate dehydrogenase [EC:1.1.1.87] (A)	-	GO:0016616//oxidoreductase activity, acting on the CH-OH group of donors, NAD or NADP as acceptor;GO:0000287//magnesium ion binding;GO:0016616//oxidoreductase activity, acting on the CH-OH group of donors, NAD or NADP as acceptor;GO:0051287//NAD binding	GO:0055114//oxidation-reduction process;GO:0055114//oxidation-reduction process
PDE_05339	238.84	186.954	315.86	123.735	96.3147	-1.31022	0.932301	5.46088e-08	1.28231e-06	hypothetical protein	-	-	-	-
PDE_05355	24.8113	12.1424	39.8772	29.2211	5.75526	-2.10805	0.866553	4.69056e-05	0.000575937	hypothetical protein	-	-	-	-
PDE_05356	23.9832	13.4952	41.9232	30.9229	9.12426	-1.39425	0.827066	0.0017987	0.0124977	hypothetical protein	-	-	-	-
PDE_05404	190.775	83.7561	199.414	61.6674	58.8716	-1.69623	0.942816	1.95377e-08	5.05518e-07	hypothetical protein	K13621|2|2e-08|54.7|aor:AOR_1_1016014|betaine lipid synthase (A)	-	-	-
PDE_05414	24.3678	30.9558	65.2312	98.27	9.63742	-1.33826	0.823595	8.3311e-05	0.000948154	hypothetical protein	-	-	-	-
PDE_05524	21.1246	10.5915	96.1481	11.7459	5.25305	-2.0077	0.846611	1.94055e-12	1.0641e-10	hypothetical protein	-	-	-	-
PDE_05527	204.679	64.2266	441.125	128.695	36.814	-2.47504	0.95428	1.15175e-33	3.96983e-31	putative glucoamylase	K01178|1|0.0|785|nfi:NFIA_001210|glucoamylase [EC:3.2.1.3] (A)	-	GO:0004339//glucan 1,4-alpha-glucosidase activity;GO:0004339//glucan 1,4-alpha-glucosidase activity;GO:0004339//glucan 1,4-alpha-glucosidase activity;GO:0004339//glucan 1,4-alpha-glucosidase activity;GO:0004339//glucan 1,4-alpha-glucosidase activity;GO:0004339//glucan 1,4-alpha-glucosidase activity;GO:0004339//glucan 1,4-alpha-glucosidase activity;GO:0004553//hydrolase activity, hydrolyzing O-gly…	GO:0005976//polysaccharide metabolic process;GO:0005976//polysaccharide metabolic process;GO:0005976//polysaccharide metabolic process;GO:0005976//polysaccharide metabolic process;GO:0005976//polysaccharide metabolic process;GO:0005976//polysaccharide metabolic process;GO:0005976//polysaccharide metabolic process;GO:0005976//polysaccharide metabolic process;GO:0005976//polysaccharide metabolic pr…
PDE_05550	353.778	233.632	657.523	249.362	163.967	-1.10944	0.924341	0.058311	0.18433	hypothetical protein	-	-	GO:0016209//antioxidant activity;GO:0016491//oxidoreductase activity;GO:0051920//peroxiredoxin activity	GO:0055114//oxidation-reduction process;GO:0055114//oxidation-reduction process
PDE_05554	37.3533	20.0167	76.5942	20.9996	15.961	-1.22668	0.857177	5.21974e-05	0.000628126	hypothetical protein	K12667|1|2e-144|411|pcs:Pc18g02820|oligosaccharyltransferase complex subunit delta (ribophorin II) (A)	GO:0005789//endoplasmic reticulum membrane;GO:0008250//oligosaccharyltransferase complex	GO:0004579//dolichyl-diphosphooligosaccharide-protein glycotransferase activity	GO:0018279//protein N-linked glycosylation via asparagine
PDE_05948	210.201	141.973	304.548	81.4556	60.5772	-1.79492	0.946165	2.84632e-10	1.06061e-08	hypothetical protein	-	-	-	-
PDE_05949	917.046	554.105	1302.15	464.155	302.562	-1.59976	0.952536	1.8764e-13	1.22359e-11	hypothetical protein	-	-	-	-
PDE_05982	84.0239	52.389	71.5545	53.5813	30.1763	-1.47739	0.916952	7.23664e-08	1.66288e-06	hypothetical protein	K13348|1|1e-103|298|pcs:Pc21g13610|protein Mpv17 (A)	GO:0016021//integral component of membrane	-	-
PDE_06013	86.9897	57.5305	94.1081	70.475	39.4639	-1.14031	0.899824	2.43368e-05	0.000325311	hypothetical protein	K00801|1|0.0|800|pcs:Pc21g13930|farnesyl-diphosphate farnesyltransferase [EC:2.5.1.21] (A)	GO:0016021//integral component of membrane	GO:0016740//transferase activity;GO:0016765//transferase activity, transferring alkyl or aryl (other than methyl) groups;GO:0016765//transferase activity, transferring alkyl or aryl (other than methyl) groups;GO:0004310//farnesyl-diphosphate farnesyltransferase activity	GO:0009058//biosynthetic process;GO:0008610//lipid biosynthetic process
PDE_06070	30.3474	20.949	39.6275	12.7915	6.18269	-2.29527	0.888428	4.65844e-10	1.67132e-08	hypothetical protein	-	-	-	-
PDE_06071	37.2671	24.6785	45.6018	20.6616	9.50836	-1.97063	0.894903	3.04819e-15	2.37243e-13	hypothetical protein	-	GO:0016021//integral component of membrane	-	GO:0055085//transmembrane transport
PDE_06231	54.3581	36.3804	74.6162	35.9452	25.3765	-1.099	0.872078	0.000239099	0.00230754	hypothetical protein	K12669|1|0.0|531|pcs:Pc21g11410|oligosaccharyltransferase complex subunit gamma (A)	-	-	-
PDE_06253	43.4156	35.6424	133.321	38.999	20.5008	-1.08253	0.854691	0.0178403	0.0778375	hypothetical protein	-	-	-	-
PDE_06264	32.2881	23.9303	37.8305	45.362	14.7839	-1.12697	0.834041	0.00139087	0.0102	hypothetical protein	-	-	-	-
PDE_06400	110.141	79.0359	122.798	74.4112	40.6907	-1.43658	0.923806	0.000501326	0.00437067	putative beta-N-acetylhexosaminidase	K01567|2|4e-149|427|afm:AFUA_4G13770|[EC:3.-.-.-] (A)	-	-	-
PDE_06534	55.7382	39.3706	54.3645	53.65	22.0233	-1.33963	0.892814	5.5919e-07	1.09246e-05	hypothetical protein	K07748|1|0.0|706|pcs:Pc12g00300|sterol-4alpha-carboxylate 3-dehydrogenase (decarboxylating) [EC:1.1.1.170] (A)	-	-	-
PDE_06571	206.16	64.8069	613.207	69.7778	39.1682	-2.39601	0.953797	1.33831e-25	2.69083e-23	hypothetical protein	-	-	-	-
PDE_06758	47.8189	39.2828	49.4904	58.7756	21.5623	-1.14907	0.868918	0.000138499	0.00146724	hypothetical protein	-	GO:0005622//intracellular;GO:0005840//ribosome;GO:0005622//intracellular;GO:0005840//ribosome;GO:0005622//intracellular;GO:0005840//ribosome	GO:0003735//structural constituent of ribosome;GO:0003735//structural constituent of ribosome;GO:0003735//structural constituent of ribosome	GO:0006412//translation;GO:0006412//translation;GO:0006412//translation
PDE_06802	128.612	53.2531	220.259	146.628	40.7254	-1.65902	0.935892	1.95972e-10	7.56529e-09	hypothetical protein	-	-	-	-
PDE_06826	287.7	187.707	301.94	159.214	132.411	-1.11954	0.923806	1.59988e-05	0.0002264	hypothetical protein	K16938|1|0.0|686|afm:AFUA_1G08850|septin 3/9/12 (A)	-	GO:0005525//GTP binding	GO:0007049//cell cycle
PDE_06999	34.2214	25.9965	33.9924	38.1566	16.7814	-1.02803	0.826082	0.000714862	0.00581714	hypothetical protein	-	-	-	-
PDE_07076	49.7909	40.7515	63.4761	89.2874	23.3222	-1.09418	0.865914	0.000705048	0.00574697	hypothetical protein	K02948|1|1e-104|303|afm:AFUA_1G09850|small subunit ribosomal protein S11 (A)	GO:0005840//ribosome;GO:0005840//ribosome	GO:0003735//structural constituent of ribosome;GO:0003735//structural constituent of ribosome	GO:0006412//translation;GO:0006412//translation
PDE_07192	26.0329	17.2136	25.3385	22.9093	10.1809	-1.35448	0.832436	0.000183112	0.00185631	hypothetical protein	-	-	-	-
PDE_07326	68.6344	53.964	75.7327	93.8301	25.4918	-1.4289	0.907818	2.27166e-06	3.88032e-05	hypothetical protein	K17424|1|5e-80|235|act:ACLA_016470|large subunit ribosomal protein L43, mitochondrial (A)	-	-	-
PDE_07353	100.927	55.7399	208.977	60.3968	26.149	-1.94848	0.936686	1.93603e-17	1.90659e-15	hypothetical protein	-	-	-	-
PDE_07473	116.659	78.203	126.76	160.729	46.0538	-1.3409	0.920871	5.42054e-08	1.27847e-06	hypothetical protein	K10808|1|0.0|754|ang:ANI_1_944124|ribonucleoside-diphosphate reductase subunit M2 [EC:1.17.4.1] (A)	-	-	-
PDE_07475	1253.99	1756.17	6051.4	13131.5	561.427	-1.15935	0.935357	4.8909e-06	7.71275e-05	putative cutinase	K08095|1|5e-106|308|nfi:NFIA_102190|cutinase [EC:3.1.1.74] (A)	-	-	-
PDE_07512	31.8092	24.0578	39.7573	43.1122	12.1008	-1.39434	0.856072	9.39105e-05	0.00105756	hypothetical protein	K02867|1|3e-100|288|pcs:Pc21g06920|large subunit ribosomal protein L11 (A)	-	-	-
PDE_07548	40.3487	36.1389	42.9414	41.3907	18.9295	-1.09188	0.849805	0.00965457	0.048504	hypothetical protein	-	-	-	-
PDE_07667	87.4168	76.5516	159.261	104.298	30.3386	-1.52675	0.920128	3.07864e-05	0.000395632	hypothetical protein	K00381|1|0.0|2696|pcs:Pc21g02880|sulfite reductase (NADPH) hemoprotein beta-component [EC:1.8.1.2] (A)	-	GO:0016491//oxidoreductase activity;GO:0020037//heme binding;GO:0051536//iron-sulfur cluster binding;GO:0005506//iron ion binding;GO:0010181//FMN binding;GO:0005506//iron ion binding;GO:0010181//FMN binding;GO:0005506//iron ion binding;GO:0010181//FMN binding;GO:0005506//iron ion binding;GO:0010181//FMN binding;GO:0016491//oxidoreductase activity;GO:0020037//heme binding;GO:0051536//iron-sulfur c…	GO:0055114//oxidation-reduction process;GO:0055114//oxidation-reduction process;GO:0055114//oxidation-reduction process;GO:0055114//oxidation-reduction process;GO:0055114//oxidation-reduction process;GO:0055114//oxidation-reduction process;GO:0055114//oxidation-reduction process;GO:0055114//oxidation-reduction process;GO:0055114//oxidation-reduction process;GO:0055114//oxidation-reduction process…
PDE_07836	431.714	229.779	634.867	323.238	112.597	-1.93891	0.955385	4.06622e-19	4.56315e-17	hypothetical protein	K02128|1|6e-72|216|pcs:Pc21g19380|F-type H+-transporting ATPase subunit c (A)	GO:0045263//proton-transporting ATP synthase complex, coupling factor F(o);GO:0045263//proton-transporting ATP synthase complex, coupling factor F(o);GO:0045263//proton-transporting ATP synthase complex, coupling factor F(o);GO:0033177//proton-transporting two-sector ATPase complex, proton-transporting domain	GO:0015078//hydrogen ion transmembrane transporter activity;GO:0015078//hydrogen ion transmembrane transporter activity;GO:0015078//hydrogen ion transmembrane transporter activity;GO:0015078//hydrogen ion transmembrane transporter activity	GO:0015986//ATP synthesis coupled proton transport;GO:0015986//ATP synthesis coupled proton transport;GO:0015986//ATP synthesis coupled proton transport;GO:0015991//ATP hydrolysis coupled proton transport
PDE_07841	34.7137	24.9066	45.6796	56.3335	17.2311	-1.01049	0.824165	0.00321731	0.0203391	hypothetical protein	K17427|1|0.0|526|afv:AFLA_002470|large subunit ribosomal protein L46, mitochondrial (A)	-	-	-
PDE_07985	40.1149	34.0022	39.0536	38.304	19.818	-1.01733	0.83815	0.00235599	0.0155365	hypothetical protein	K10739|1|6e-149|421|pcs:Pc21g21700|replication factor A2 (A)	-	GO:0003676//nucleic acid binding	-
PDE_08090	130.336	92.6266	99.5258	184.103	47.8637	-1.44523	0.92833	8.87593e-07	1.6708e-05	hypothetical protein	-	-	-	-
PDE_08118	64.1134	52.0733	66.0745	105.941	30.3545	-1.07872	0.880642	5.01704e-05	0.000610586	hypothetical protein	K12830|1|0.0|2271|nfi:NFIA_059370|splicing factor 3B subunit 3 (A)	GO:0005634//nucleus	GO:0003676//nucleic acid binding	-
PDE_08477	140.374	135.568	152.936	203.766	50.9752	-1.46141	0.930471	7.96711e-10	2.70741e-08	hypothetical protein	-	-	GO:0001671//ATPase activator activity;GO:0051087//chaperone binding;GO:0001671//ATPase activator activity;GO:0051087//chaperone binding	GO:0006950//response to stress
PDE_08527	36.3635	26.2798	36.7131	34.0918	17.7613	-1.03376	0.832211	0.00182004	0.0126187	hypothetical protein	-	GO:0005840//ribosome;GO:0005840//ribosome;GO:0005622//intracellular;GO:0005840//ribosome	GO:0003735//structural constituent of ribosome;GO:0003735//structural constituent of ribosome;GO:0003735//structural constituent of ribosome	GO:0006412//translation;GO:0006412//translation;GO:0006412//translation
PDE_08582	57.3098	35.4771	62.8286	112.465	21.6166	-1.40664	0.898615	0.000700902	0.00572285	hypothetical protein	-	-	-	-
PDE_08629	110.9	77.5605	323.989	69.2579	48.7463	-1.18589	0.911323	3.95127e-06	6.39827e-05	hypothetical protein	K08054|1|0.0|927|pcs:Pc22g02800|calnexin (A)	GO:0005783//endoplasmic reticulum;GO:0005783//endoplasmic reticulum;GO:0005783//endoplasmic reticulum;GO:0005783//endoplasmic reticulum;GO:0005783//endoplasmic reticulum;GO:0005783//endoplasmic reticulum;GO:0005783//endoplasmic reticulum	GO:0005509//calcium ion binding;GO:0005509//calcium ion binding;GO:0005509//calcium ion binding;GO:0005509//calcium ion binding;GO:0005509//calcium ion binding;GO:0051082//unfolded protein binding;GO:0005509//calcium ion binding;GO:0051082//unfolded protein binding;GO:0005509//calcium ion binding;GO:0051082//unfolded protein binding;GO:0005509//calcium ion binding;GO:0051082//unfolded protein bin…	GO:0006457//protein folding;GO:0006457//protein folding;GO:0006457//protein folding;GO:0006457//protein folding;GO:0006457//protein folding;GO:0006457//protein folding;GO:0006457//protein folding
PDE_08788	56.6259	50.1885	204.248	141.944	12.5921	-2.16894	0.922287	6.03253e-07	1.17616e-05	hypothetical protein	K00380|1|0.0|1806|pcs:Pc12g08580|sulfite reductase (NADPH) flavoprotein alpha-component [EC:1.8.1.2] (A)	-	GO:0016491//oxidoreductase activity;GO:0016491//oxidoreductase activity;GO:0016491//oxidoreductase activity;GO:0016491//oxidoreductase activity;GO:0016491//oxidoreductase activity;GO:0016491//oxidoreductase activity;GO:0016491//oxidoreductase activity;GO:0016491//oxidoreductase activity;GO:0016903//oxidoreductase activity, acting on the aldehyde or oxo group of donors;GO:0016491//oxidoreductase a…	GO:0055114//oxidation-reduction process;GO:0055114//oxidation-reduction process;GO:0055114//oxidation-reduction process;GO:0055114//oxidation-reduction process;GO:0055114//oxidation-reduction process;GO:0055114//oxidation-reduction process;GO:0055114//oxidation-reduction process;GO:0055114//oxidation-reduction process;GO:0055114//oxidation-reduction process;GO:0055114//oxidation-reduction process
PDE_08980	170.991	122.127	883.961	323.766	82.6121	-1.04949	0.910494	0.000132932	0.00142073	putative Hsp70 molecular chaperone	K09490|1|0.0|1236|pcs:Pc12g10670|heat shock 70kDa protein 5 (A)	-	-	-
PDE_09141	71.6568	23.0834	317.68	109.707	14.3698	-2.31806	0.93237	4.89251e-05	0.000598449	hypothetical protein	K17069|1|0.0|815|pcs:Pc12g05420|O-acetylhomoserine/O-acetylserine sulfhydrylase [EC:2.5.1.49 2.5.1.47] (A)	-	GO:0016765//transferase activity, transferring alkyl or aryl (other than methyl) groups;GO:0030170//pyridoxal phosphate binding;GO:0030170//pyridoxal phosphate binding	GO:0006520//cellular amino acid metabolic process
PDE_09351	36.4504	27.7316	43.2443	44.588	17.3368	-1.0721	0.839169	0.000706507	0.00575401	hypothetical protein	K02931|1|0.0|574|afv:AFLA_048890|large subunit ribosomal protein L5 (A)	GO:0005840//ribosome	GO:0003735//structural constituent of ribosome	GO:0006412//translation
PDE_09366	48.1418	30.3928	73.3731	31.7719	23.6878	-1.02315	0.853534	0.00074197	0.00598266	hypothetical protein	K12670|1|0.0|769|pcs:Pc21g17310|oligosaccharyltransferase complex subunit beta (A)	GO:0005789//endoplasmic reticulum membrane	GO:0004579//dolichyl-diphosphooligosaccharide-protein glycotransferase activity	GO:0018279//protein N-linked glycosylation via asparagine
PDE_09400	34.4109	17.7598	62.1735	23.209	10.2655	-1.74507	0.881902	1.01585e-13	6.85591e-12	hypothetical protein	K15979|1|0.0|1482|pcs:Pc21g16930|staphylococcal nuclease domain-containing protein 1 (A)	-	GO:0003676//nucleic acid binding;GO:0003676//nucleic acid binding;GO:0003676//nucleic acid binding;GO:0003676//nucleic acid binding;GO:0003676//nucleic acid binding;GO:0003676//nucleic acid binding;GO:0003676//nucleic acid binding;GO:0003676//nucleic acid binding;GO:0003676//nucleic acid binding;GO:0003676//nucleic acid binding;GO:0003676//nucleic acid binding;GO:0003676//nucleic acid binding	-
PDE_09417	1313.28	423.454	4559.39	2460.09	21.4762	-5.93429	0.989589	4.02483e-179	1.94218e-175	glucoamylase Amy15A	K01178|1|0.0|1016|afm:AFUA_2G00690|glucoamylase [EC:3.2.1.3] (A)	-	GO:0004339//glucan 1,4-alpha-glucosidase activity;GO:2001070//starch binding;GO:0004339//glucan 1,4-alpha-glucosidase activity;GO:0004339//glucan 1,4-alpha-glucosidase activity;GO:0004339//glucan 1,4-alpha-glucosidase activity;GO:0004339//glucan 1,4-alpha-glucosidase activity;GO:0004339//glucan 1,4-alpha-glucosidase activity;GO:0004339//glucan 1,4-alpha-glucosidase activity;GO:0004339//glucan 1,4…	GO:0005976//polysaccharide metabolic process;GO:0005976//polysaccharide metabolic process;GO:0005976//polysaccharide metabolic process;GO:0005976//polysaccharide metabolic process;GO:0005976//polysaccharide metabolic process;GO:0005976//polysaccharide metabolic process;GO:0005976//polysaccharide metabolic process;GO:0005976//polysaccharide metabolic process;GO:0005976//polysaccharide metabolic pr…
PDE_09452	123.249	67.3003	409.677	123.122	23.7018	-2.37851	0.946701	1.25161e-28	3.17877e-26	hypothetical protein	-	-	-	-
PDE_09456	295.507	184.505	298.467	163.604	122.167	-1.27434	0.932577	1.68373e-07	3.5936e-06	hypothetical protein	K16948|1|0.0|765|pcs:Pc21g16350|cell division control protein 12 (A)	-	GO:0005525//GTP binding	GO:0007049//cell cycle
PDE_09521	129.988	83.5206	193.963	55.633	44.425	-1.54893	0.932284	1.74884e-11	8.43901e-10	hypothetical protein	-	-	-	-
PDE_09556	40.8952	27.6673	46.7176	50.5868	19.0751	-1.10024	0.851894	0.000872259	0.00683486	hypothetical protein	-	-	-	-
PDE_09568	25.7544	16.9929	65.6067	15.333	10.5298	-1.29035	0.826151	4.47018e-07	8.87689e-06	hypothetical protein	-	-	-	-
PDE_09594	139.852	78.5395	279.677	98.9436	52.1058	-1.42439	0.928796	1.84001e-09	5.76557e-08	hypothetical protein	K10956|1|0.0|952|pcs:Pc22g15970|protein transport protein SEC61 subunit alpha (A)	-	-	-
PDE_09715	2374.91	1355.35	5221.5	1622.02	509.159	-2.22169	0.964415	3.90576e-28	8.97488e-26	hypothetical protein	-	-	-	-
PDE_09810	21.3128	16.2914	34.9366	24.6153	5.23788	-2.02467	0.847923	1.57087e-07	3.37349e-06	hypothetical protein	K00641|1|0.0|867|pcs:Pc22g16570|homoserine O-acetyltransferase [EC:2.3.1.31] (A)	-	-	-
PDE_09818	229.333	137.463	239.853	134.899	99.1362	-1.20996	0.926897	1.22208e-06	2.22534e-05	hypothetical protein	K16945|1|0.0|700|nfi:NFIA_078740|cell division control protein 11 (A)	-	-	-
PDE_09830	45.4481	31.4251	128.17	35.2248	15.1754	-1.58248	0.893556	2.38135e-08	6.04283e-07	hypothetical protein	-	-	-	-
PDE_09832	12292.9	7305.12	27678.8	8269.59	2117.16	-2.53762	0.96723	1.14022e-22	1.69297e-20	hypothetical protein	-	-	-	-
PDE_09871	49.6693	35.9723	79.67	22.4404	24.5697	-1.01548	0.855675	0.000614357	0.00516028	hypothetical protein	-	-	-	-
PDE_09872	51.3132	38.1094	89.5668	23.5251	25.2854	-1.02102	0.858006	0.00436164	0.025952	hypothetical protein	-	-	-	-
PDE_09875	84.2825	47.3239	104.616	35.5049	33.3739	-1.33651	0.910926	1.68677e-07	3.5936e-06	hypothetical protein	K10246|1|0.0|594|pcs:Pc21g18830|fatty acid elongase 3 [EC:2.3.1.199] (A)	-	-	-
PDE_09910	154.312	92.1298	381.083	50.1162	42.2653	-1.86831	0.943351	1.3141e-16	1.16352e-14	hypothetical protein	K01003|5|3e-98|292|afm:AFUA_5G07230|carboxyvinyl-carboxyphosphonate phosphorylmutase [EC:2.7.8.23] (A)	-	-	-
PDE_09911	74.6488	42.4998	142.437	24.2637	23.3369	-1.67751	0.921285	7.92684e-13	4.63648e-11	hypothetical protein	K00480|2|1e-70|233|spaa:SPAPADRAFT_64670|salicylate hydroxylase [EC:1.14.13.1] (A)	-	-	-
PDE_09953	144.139	122.112	169.432	114.707	70.8502	-1.02461	0.902172	0.000581958	0.00493973	hypothetical protein	-	-	-	-
PDE_10000	59.8368	32.9429	95.4147	30.1671	12.6797	-2.23852	0.92536	1.03863e-18	1.12627e-16	hypothetical protein	K18387|2|4e-44|152|afv:AFLA_045510|paspaline synthase (A)	-	-	-
PDE_10001	26.3071	12.1808	80.4951	18.8656	4.74576	-2.47074	0.880106	6.80466e-17	6.25445e-15	hypothetical protein	K00804|1|1e-141|407|nfi:NFIA_096070|geranylgeranyl diphosphate synthase, type III [EC:2.5.1.1 2.5.1.10 2.5.1.29] (A)	-	-	-
PDE_10002	36.487	21.5206	83.2802	21.2584	7.98332	-2.19232	0.898874	3.88884e-15	2.93213e-13	hypothetical protein	-	-	-	-
PDE_10003	43.4301	23.1459	90.243	19.6167	7.26379	-2.5799	0.915708	6.37506e-17	5.91593e-15	hypothetical protein	-	-	-	-
PDE_10005	21.9814	12.1716	142.981	35.813	2.73757	-3.00531	0.872734	6.40168e-24	1.0839e-21	hypothetical protein	-	-	-	-
PDE_10007	26.5139	11.8896	116.412	34.0071	3.79928	-2.80295	0.886098	2.04587e-28	4.93618e-26	hypothetical protein	-	-	-	-
PDE_10009	24.8022	8.899	199.953	31.5142	2.64034	-3.23167	0.885925	2.46038e-25	4.84594e-23	hypothetical protein	K17825|2|3e-54|182|ure:UREG_04217|verruculogen synthase [EC:1.14.11.38] (A)	-	-	-

## Sheet: Group_2 122 genes
GeneID	Means (Wild-type on Cellulose)	Means (ΔclrB on Cellulose)	Means (ΔcreA on Cellulose)	Means (ΔcreA-ΔclrB on Cellulose)	Means (ΔamyR on Cellulose)	log2Ratio(ΔamyR/Wild-type)	Probability (ΔamyR/Wild-type)	P-value (ΔamyR/Wild-type)	FDR (ΔamyR/Wild-type)	P-value (ΔamyR/Wild-type)	FDR (ΔamyR/Wild-type)	Description	KEGG Orthology	GO Component	GO Function	GO Process
PDE_00155	126.769	88.0839	137.133	122.773	63.1045	-1.00638	0.898218	0.00246183	0.0161079	0.00246183	0.0161079	hypothetical protein	K17784|1|3e-55|169|pcs:Pc13g12160|mitochondrial inner membrane organizing system protein 1 (A)	-	-	-
PDE_00206	76.3776	51.9138	111.639	121.349	29.8449	-1.35566	0.909009	6.05766e-07	1.17868e-05	6.05766e-07	1.17868e-05	hypothetical protein	K11129|1|5e-106|308|pcs:Pc13g12610|H/ACA ribonucleoprotein complex subunit 2 (A)	GO:0030529//ribonucleoprotein complex	-	GO:0042254//ribosome biogenesis
PDE_00266	44.0537	32.5863	46.1946	58.9588	21.1241	-1.06037	0.85274	0.000290769	0.00273311	0.000290769	0.00273311	hypothetical protein	K17807|1|0.0|722|pcs:Pc16g12620|mitochondrial translocator assembly and maintenance protein 41 (A)	-	-	-
PDE_00286	70.4372	54.9375	103.773	131.202	33.1493	-1.08736	0.886132	0.000430689	0.00382039	0.000430689	0.00382039	hypothetical protein	K14563|1|2e-162|459|ang:ANI_1_1646014|rRNA 2'-O-methyltransferase fibrillarin [EC:2.1.1.-] (A)	-	GO:0003723//RNA binding;GO:0008168//methyltransferase activity;GO:0003723//RNA binding;GO:0008168//methyltransferase activity;GO:0003723//RNA binding;GO:0008168//methyltransferase activity;GO:0003723//RNA binding;GO:0008168//methyltransferase activity;GO:0003723//RNA binding;GO:0008168//methyltransferase activity;GO:0003723//RNA binding;GO:0008168//methyltransferase activity;GO:0003723//RNA bindi…	GO:0006364//rRNA processing;GO:0008033//tRNA processing;GO:0006364//rRNA processing;GO:0008033//tRNA processing;GO:0006364//rRNA processing;GO:0008033//tRNA processing;GO:0006364//rRNA processing;GO:0008033//tRNA processing;GO:0006364//rRNA processing;GO:0008033//tRNA processing;GO:0006364//rRNA processing;GO:0008033//tRNA processing;GO:0006364//rRNA processing;GO:0008033//tRNA processing;GO:0006…
PDE_00304	266.4	149.907	502.102	335.839	105.125	-1.34149	0.934476	4.89862e-08	1.17021e-06	4.89862e-08	1.17021e-06	hypothetical protein	K02880|1|1e-116|332|pcs:Pc16g12990|large subunit ribosomal protein L17e (A)	GO:0005622//intracellular;GO:0005840//ribosome;GO:0015934//large ribosomal subunit;GO:0005840//ribosome	GO:0003735//structural constituent of ribosome;GO:0003735//structural constituent of ribosome;GO:0003735//structural constituent of ribosome	GO:0006412//translation;GO:0006412//translation;GO:0006412//translation
PDE_00305	25.4892	17.9596	39.9446	21.1855	6.04989	-2.07491	0.868107	4.49397e-06	7.19259e-05	4.49397e-06	7.19259e-05	hypothetical protein	-	-	-	-
PDE_00374	231.216	126.384	470.533	290.415	91.5658	-1.33636	0.933216	3.04262e-08	7.66693e-07	3.04262e-08	7.66693e-07	hypothetical protein	K02932|1|0.0|549|act:ACLA_022570|large subunit ribosomal protein L5e (A)	GO:0005622//intracellular;GO:0005840//ribosome;GO:0005622//intracellular;GO:0005840//ribosome;GO:0005622//intracellular;GO:0005840//ribosome;GO:0005622//intracellular;GO:0005840//ribosome;GO:0005622//intracellular;GO:0005840//ribosome;GO:0005622//intracellular;GO:0005840//ribosome;GO:0005622//intracellular;GO:0005840//ribosome	GO:0003735//structural constituent of ribosome;GO:0003735//structural constituent of ribosome;GO:0008097//5S rRNA binding;GO:0003735//structural constituent of ribosome;GO:0008097//5S rRNA binding;GO:0003735//structural constituent of ribosome;GO:0008097//5S rRNA binding;GO:0003735//structural constituent of ribosome;GO:0008097//5S rRNA binding;GO:0003735//structural constituent of ribosome;GO:00…	GO:0006412//translation;GO:0006412//translation;GO:0006412//translation;GO:0006412//translation;GO:0006412//translation;GO:0006412//translation;GO:0006412//translation
PDE_00406	451.422	260.138	958.478	548.086	178.655	-1.3373	0.939363	2.19774e-08	5.59642e-07	2.19774e-08	5.59642e-07	hypothetical protein	K02989|1|5e-124|353|cim:CIMG_03305|small subunit ribosomal protein S5e (A)	GO:0015935//small ribosomal subunit	GO:0003723//RNA binding;GO:0003735//structural constituent of ribosome;GO:0003735//structural constituent of ribosome	GO:0006412//translation;GO:0006412//translation
PDE_00491	348.909	198.791	753.956	416.423	121.397	-1.52312	0.943696	6.85769e-11	2.92848e-09	6.85769e-11	2.92848e-09	hypothetical protein	K02957|1|6e-93|268|pcs:Pc16g14740|small subunit ribosomal protein S15Ae (A)	GO:0005840//ribosome;GO:0005840//ribosome	GO:0003735//structural constituent of ribosome;GO:0003735//structural constituent of ribosome	GO:0006412//translation;GO:0006412//translation
PDE_00629	476.417	253.689	912.132	574.85	174.791	-1.44659	0.943714	3.80761e-10	1.39864e-08	3.80761e-10	1.39864e-08	hypothetical protein	K02934|1|1e-125|356|pcs:Pc13g08880|large subunit ribosomal protein L6e (A)	GO:0005622//intracellular;GO:0005840//ribosome	GO:0003735//structural constituent of ribosome	GO:0006412//translation
PDE_00817	301.989	184.694	583.284	307.887	103.084	-1.55067	0.943731	4.6244e-10	1.6653e-08	4.6244e-10	1.6653e-08	hypothetical protein	K02979|1|2e-41|133|pcs:Pc21g08830|small subunit ribosomal protein S28e (A)	GO:0005622//intracellular;GO:0005840//ribosome;GO:0005622//intracellular;GO:0005840//ribosome	GO:0003735//structural constituent of ribosome;GO:0003735//structural constituent of ribosome	GO:0006412//translation;GO:0006412//translation
PDE_00987	174.142	109.969	397.634	470.245	83.3357	-1.06325	0.911323	7.24723e-05	0.000838645	7.24723e-05	0.000838645	hypothetical protein	K03283|1|0.0|1177|afv:AFLA_012200|heat shock 70kDa protein 1/8 (A)	-	-	-
PDE_01007	187.138	104.57	330.451	194.252	73.7823	-1.34276	0.930263	1.17009e-07	2.59003e-06	1.17009e-07	2.59003e-06	hypothetical protein	K02903|1|4e-81|239|pcs:Pc12g04760|large subunit ribosomal protein L28e (A)	-	-	-
PDE_01023	55.6965	43.4807	55.3307	37.2793	27.3854	-1.02418	0.863238	0.000940085	0.00729969	0.000940085	0.00729969	hypothetical protein	K00227|1|0.0|630|pcs:Pc12g04600|lathosterol oxidase [EC:1.14.21.6] (A)	-	GO:0005506//iron ion binding;GO:0016491//oxidoreductase activity	GO:0006633//fatty acid biosynthetic process;GO:0055114//oxidation-reduction process
PDE_01365	82.0361	67.376	122.175	128.344	35.8495	-1.19431	0.901499	6.22897e-06	9.58784e-05	6.22897e-06	9.58784e-05	hypothetical protein	K09522|1|0.0|682|act:ACLA_054750|DnaJ homolog subfamily C member 2 (A)	-	-	-
PDE_01517	336.892	192.079	656.425	362.313	126.323	-1.41517	0.940312	2.56597e-09	7.83677e-08	2.56597e-09	7.83677e-08	hypothetical protein	K02900|1|1e-100|288|ang:ANI_1_1440094|large subunit ribosomal protein L27Ae (A)	GO:0005622//intracellular;GO:0005840//ribosome	GO:0003735//structural constituent of ribosome	GO:0006412//translation
PDE_01695	357.688	211.861	846.666	448.711	136.863	-1.38597	0.940226	1.17074e-08	3.13857e-07	1.17074e-08	3.13857e-07	hypothetical protein	K02969|1|7e-79|231|pcs:Pc20g04380|small subunit ribosomal protein S20e (A)	GO:0005622//intracellular;GO:0005840//ribosome;GO:0015935//small ribosomal subunit;GO:0005840//ribosome;GO:0005840//ribosome;GO:0005840//ribosome;GO:0005840//ribosome	GO:0003723//RNA binding;GO:0003735//structural constituent of ribosome;GO:0003735//structural constituent of ribosome;GO:0003735//structural constituent of ribosome;GO:0003735//structural constituent of ribosome;GO:0003735//structural constituent of ribosome;GO:0003735//structural constituent of ribosome	GO:0006412//translation;GO:0006412//translation;GO:0006412//translation;GO:0006412//translation;GO:0006412//translation;GO:0006412//translation
PDE_01806	498.396	273.345	906.943	523.139	156.82	-1.66818	0.951483	3.35991e-14	2.40196e-12	3.35991e-14	2.40196e-12	hypothetical protein	K02997|1|2e-130|367|afv:AFLA_101160|small subunit ribosomal protein S9e (A)	GO:0005622//intracellular;GO:0005622//intracellular;GO:0015935//small ribosomal subunit	GO:0019843//rRNA binding;GO:0003723//RNA binding;GO:0019843//rRNA binding;GO:0003723//RNA binding;GO:0003735//structural constituent of ribosome;GO:0003723//RNA binding	GO:0006412//translation
PDE_01807	502.056	284.448	1015.91	597.011	191.57	-1.38998	0.942833	3.3859e-09	1.01576e-07	3.3859e-09	1.01576e-07	hypothetical protein	K02889|1|3e-105|301|pcs:Pc20g02750|large subunit ribosomal protein L21e (A)	GO:0005622//intracellular;GO:0005840//ribosome;GO:0005622//intracellular;GO:0005840//ribosome	GO:0003735//structural constituent of ribosome;GO:0003735//structural constituent of ribosome	GO:0006412//translation;GO:0006412//translation
PDE_01817	349.224	185.11	736.919	395.592	131.396	-1.41023	0.940329	1.06042e-09	3.52899e-08	1.06042e-09	3.52899e-08	hypothetical protein	K02987|1|0.0|502|afm:AFUA_3G06840|small subunit ribosomal protein S4e (A)	GO:0005622//intracellular;GO:0005840//ribosome	GO:0003723//RNA binding;GO:0003723//RNA binding;GO:0003723//RNA binding;GO:0003735//structural constituent of ribosome	GO:0006412//translation
PDE_01824	291.562	170.303	552.979	351.663	124.132	-1.23193	0.930384	3.14105e-06	5.1908e-05	3.14105e-06	5.1908e-05	hypothetical protein	K02922|1|1e-57|176|pcs:Pc20g02980|large subunit ribosomal protein L37e (A)	GO:0005622//intracellular;GO:0005840//ribosome;GO:0005622//intracellular;GO:0005840//ribosome;GO:0005622//intracellular;GO:0005840//ribosome	GO:0003735//structural constituent of ribosome;GO:0003735//structural constituent of ribosome;GO:0003735//structural constituent of ribosome	GO:0006412//translation;GO:0006412//translation;GO:0006412//translation
PDE_01832	474.023	303.569	862.17	547.841	231.132	-1.03624	0.921803	0.000238525	0.00230431	0.000238525	0.00230431	hypothetical protein	K02978|1|2e-54|167|pcs:Pc20g03120|small subunit ribosomal protein S27e (A)	GO:0005622//intracellular;GO:0005840//ribosome;GO:0005622//intracellular;GO:0005840//ribosome	GO:0003735//structural constituent of ribosome;GO:0003735//structural constituent of ribosome	GO:0006412//translation;GO:0006412//translation
PDE_01925	417.813	221.988	822.804	426.546	139.899	-1.57848	0.947391	1.90754e-11	9.06881e-10	1.90754e-11	9.06881e-10	hypothetical protein	K02917|1|2e-67|201|pcs:Pc20g03340|large subunit ribosomal protein L35Ae (A)	GO:0005622//intracellular;GO:0005840//ribosome;GO:0005622//intracellular;GO:0005840//ribosome	GO:0003735//structural constituent of ribosome;GO:0003735//structural constituent of ribosome	GO:0006412//translation;GO:0006412//translation
PDE_01951	82.0925	56.4248	128.734	60.0038	30.8214	-1.41332	0.913878	8.41812e-09	2.30151e-07	8.41812e-09	2.30151e-07	hypothetical protein	-	-	-	-
PDE_01971	55.7506	30.9426	20.7863	23.3366	22.3595	-1.3181	0.891467	0.000110931	0.00121521	0.000110931	0.00121521	hypothetical protein	-	-	-	-
PDE_02091	78.7538	38.6257	263.757	108.722	21.7964	-1.85326	0.927242	1.23545e-15	1.01908e-13	1.23545e-15	1.01908e-13	hypothetical protein	K00053|1|0.0|754|ani:AN2526.2|ketol-acid reductoisomerase [EC:1.1.1.86] (A)	-	-	-
PDE_02156	39.9181	34.1413	52.0056	56.4845	18.9787	-1.07266	0.847042	0.000402344	0.00360541	0.000402344	0.00360541	hypothetical protein	K00948|1|0.0|757|pcs:Pc20g01660|ribose-phosphate pyrophosphokinase [EC:2.7.6.1] (A)	-	-	-
PDE_02248	706.149	418.979	1106.02	615.875	258.392	-1.45041	0.946252	2.35044e-09	7.31744e-08	2.35044e-09	7.31744e-08	hypothetical protein	K02924|1|5e-30|102|pan:PODANSg5137|large subunit ribosomal protein L39e (A)	-	-	-
PDE_02298	56.4752	38.6504	82.1149	112.4	23.3786	-1.27243	0.889136	2.5271e-06	4.24896e-05	2.5271e-06	4.24896e-05	hypothetical protein	K11131|1|0.0|805|afm:AFUA_5G05710|H/ACA ribonucleoprotein complex subunit 4 [EC:5.4.99.-] (A)	-	-	-
PDE_02305	357.889	212.984	629.946	380.906	136.031	-1.39557	0.94045	7.86131e-09	2.16152e-07	7.86131e-09	2.16152e-07	hypothetical protein	K02893|1|1e-85|251|nfi:NFIA_037430|large subunit ribosomal protein L23Ae (A)	-	-	-
PDE_02379	523.38	473.068	699.969	2095.31	180.689	-1.53435	0.947063	3.78232e-12	1.99471e-10	3.78232e-12	1.99471e-10	hypothetical protein	K03283|1|0.0|1213|pcs:Pc22g11240|heat shock 70kDa protein 1/8 (A)	-	-	-
PDE_02384	40.5765	25.4306	34.1024	63.5588	19.5919	-1.05039	0.845195	0.00945202	0.0478853	0.00945202	0.0478853	carbohydrate binding domain-containing protein	-	-	-	-
PDE_02440	125.778	84.9878	141.307	133.745	57.5732	-1.12741	0.910546	3.10186e-05	0.000398086	3.10186e-05	0.000398086	hypothetical protein	K00161|1|0.0|777|ang:ANI_1_1206064|pyruvate dehydrogenase E1 component alpha subunit [EC:1.2.4.1] (A)	-	-	-
PDE_02590	484.054	263.058	897.699	450.308	150.542	-1.685	0.951345	1.05284e-13	7.05623e-12	1.05284e-13	7.05623e-12	hypothetical protein	K02942|1|2e-39|131|aor:AOR_1_848164|large subunit ribosomal protein LP1 (A)	GO:0005622//intracellular;GO:0005840//ribosome;GO:0005622//intracellular;GO:0005840//ribosome	GO:0003735//structural constituent of ribosome;GO:0003735//structural constituent of ribosome	GO:0006414//translational elongation;GO:0006414//translational elongation
PDE_02599	408.445	226	808.571	466.235	149.692	-1.44814	0.942609	6.13324e-10	2.1292e-08	6.13324e-10	2.1292e-08	hypothetical protein	K02901|1|3e-90|263|nfi:NFIA_018370|large subunit ribosomal protein L27e (A)	GO:0005622//intracellular;GO:0005840//ribosome	GO:0003735//structural constituent of ribosome	GO:0006412//translation
PDE_02621	37.0774	22.6192	60.8841	49.8615	15.4479	-1.26313	0.859526	1.2943e-05	0.000187187	1.2943e-05	0.000187187	hypothetical protein	K11434|1|0.0|637|pcs:Pc13g02720|protein arginine N-methyltransferase 1 [EC:2.1.1.-] (A)	-	-	-
PDE_02687	496.586	268.914	975.258	546.909	206.859	-1.2634	0.936738	2.72613e-07	5.59785e-06	2.72613e-07	5.59785e-06	hypothetical protein	K02898|1|2e-72|216|ani:AN0570.2|large subunit ribosomal protein L26e (A)	GO:0005622//intracellular;GO:0005840//ribosome;GO:0015934//large ribosomal subunit	GO:0003735//structural constituent of ribosome;GO:0003735//structural constituent of ribosome	GO:0006412//translation;GO:0006412//translation
PDE_02693	411.172	242.497	893.594	433.979	143.986	-1.51382	0.944111	1.06367e-10	4.32993e-09	1.06367e-10	4.32993e-09	hypothetical protein	K02976|1|4e-81|237|ang:ANI_1_772164|small subunit ribosomal protein S26e (A)	GO:0005622//intracellular;GO:0005840//ribosome;GO:0005622//intracellular;GO:0005840//ribosome	GO:0003735//structural constituent of ribosome;GO:0003735//structural constituent of ribosome	GO:0006412//translation;GO:0006412//translation
PDE_02707	655.215	351.336	1230.34	727.704	234.724	-1.481	0.946925	7.9504e-11	3.36532e-09	7.9504e-11	3.36532e-09	hypothetical protein	K02872|1|1e-141|396|pcs:Pc13g01870|large subunit ribosomal protein L13Ae (A)	GO:0005840//ribosome;GO:0005840//ribosome;GO:0015934//large ribosomal subunit	GO:0003735//structural constituent of ribosome;GO:0003735//structural constituent of ribosome;GO:0003735//structural constituent of ribosome	GO:0006412//translation;GO:0006412//translation;GO:0006412//translation
PDE_02743	41.7903	30.9123	42.4554	50.6496	19.907	-1.0699	0.851048	0.0004048	0.00362092	0.0004048	0.00362092	hypothetical protein	K00222|1|0.0|891|pcs:Pc18g02000|delta14-sterol reductase [EC:1.3.1.70] (A)	GO:0016020//membrane	GO:0016628//oxidoreductase activity, acting on the CH-CH group of donors, NAD or NADP as acceptor;GO:0016628//oxidoreductase activity, acting on the CH-CH group of donors, NAD or NADP as acceptor	GO:0055114//oxidation-reduction process;GO:0055114//oxidation-reduction process
PDE_02754	229.217	116.006	478.389	256.63	74.9132	-1.61342	0.942643	1.29116e-12	7.28712e-11	1.29116e-12	7.28712e-11	hypothetical protein	K02985|1|3e-180|499|nfi:NFIA_019120|small subunit ribosomal protein S3e (A)	GO:0005622//intracellular;GO:0005840//ribosome;GO:0005840//ribosome;GO:0015935//small ribosomal subunit	GO:0003723//RNA binding;GO:0003723//RNA binding;GO:0003735//structural constituent of ribosome;GO:0003735//structural constituent of ribosome;GO:0003723//RNA binding;GO:0003735//structural constituent of ribosome	GO:0006412//translation;GO:0006412//translation;GO:0006412//translation
PDE_02775	484.865	246.328	954.436	529.544	165.759	-1.54849	0.947598	1.36449e-11	6.65086e-10	1.36449e-11	6.65086e-10	hypothetical protein	K02951|1|2e-98|283|ang:ANI_1_574164|small subunit ribosomal protein S12e (A)	GO:0005622//intracellular;GO:0005840//ribosome;GO:0005622//intracellular;GO:0005840//ribosome;GO:0005622//intracellular;GO:0005840//ribosome;GO:0005622//intracellular;GO:0005840//ribosome;GO:0005622//intracellular;GO:0005840//ribosome	GO:0003735//structural constituent of ribosome;GO:0003735//structural constituent of ribosome;GO:0003735//structural constituent of ribosome;GO:0003735//structural constituent of ribosome;GO:0003735//structural constituent of ribosome	GO:0006412//translation;GO:0006412//translation;GO:0006412//translation;GO:0006412//translation;GO:0006412//translation
PDE_02785	1172.61	973.211	1524.63	2973.56	525.127	-1.15898	0.935184	8.26647e-06	0.000123689	8.26647e-06	0.000123689	hypothetical protein	K05863|1|0.0|598|nfi:NFIA_019360|solute carrier family 25 (mitochondrial adenine nucleotide translocator), member 4/5/6/31 (A)	GO:0005743//mitochondrial inner membrane;GO:0005743//mitochondrial inner membrane;GO:0005743//mitochondrial inner membrane;GO:0005743//mitochondrial inner membrane;GO:0005743//mitochondrial inner membrane	GO:0005215//transporter activity;GO:0005215//transporter activity;GO:0005215//transporter activity;GO:0005215//transporter activity;GO:0005215//transporter activity	GO:0055085//transmembrane transport;GO:0055085//transmembrane transport;GO:0055085//transmembrane transport;GO:0055085//transmembrane transport;GO:0055085//transmembrane transport;GO:0055085//transmembrane transport;GO:0006810//transport;GO:0055085//transmembrane transport;GO:0006810//transport;GO:0055085//transmembrane transport;GO:0006810//transport;GO:0055085//transmembrane transport;GO:000681…
PDE_02793	296.33	154.921	569.914	341.94	107.223	-1.46658	0.940709	9.26416e-10	3.12617e-08	9.26416e-10	3.12617e-08	hypothetical protein	K02966|1|3e-96|278|pcs:Pc18g02490|small subunit ribosomal protein S19e (A)	GO:0005622//intracellular;GO:0005840//ribosome;GO:0005622//intracellular;GO:0005840//ribosome	GO:0003735//structural constituent of ribosome;GO:0003735//structural constituent of ribosome	GO:0006412//translation;GO:0006412//translation
PDE_02848	131.856	79.5277	214.791	148.124	65.8959	-1.0007	0.897666	0.000389665	0.00350808	0.000389665	0.00350808	hypothetical protein	K15219|1|5e-137|413|pcs:Pc16g08410|RNA polymerase I-specific transcription initiation factor RRN7 (A)	GO:0005840//ribosome	GO:0005515//protein binding;GO:0003735//structural constituent of ribosome;GO:0005515//protein binding	GO:0006412//translation
PDE_02864	535.091	282.081	1035.03	638.702	174.69	-1.61499	0.950136	3.20672e-13	1.98385e-11	3.20672e-13	1.98385e-11	hypothetical protein	K02995|1|2e-132|374|ani:AN0465.2|small subunit ribosomal protein S8e (A)	GO:0005622//intracellular;GO:0005840//ribosome	GO:0003735//structural constituent of ribosome	GO:0006412//translation
PDE_02884	49.6653	33.2392	85.1416	48.6441	20.9967	-1.24208	0.878846	2.30633e-05	0.000311743	2.30633e-05	0.000311743	hypothetical protein	K09829|1|4e-143|403|pcs:Pc16g08670|C-8 sterol isomerase [EC:5.-.-.-] (A)	GO:0005783//endoplasmic reticulum	GO:0000247//C-8 sterol isomerase activity	GO:0006696//ergosterol biosynthetic process
PDE_02907	216.124	122.695	424.667	262.909	84.4751	-1.35526	0.933406	3.51427e-08	8.71882e-07	3.51427e-08	8.71882e-07	hypothetical protein	K02877|1|1e-146|409|aor:AOR_1_1580154|large subunit ribosomal protein L15e (A)	GO:0005622//intracellular;GO:0005840//ribosome;GO:0005840//ribosome	GO:0003735//structural constituent of ribosome;GO:0003735//structural constituent of ribosome	GO:0006412//translation;GO:0006412//translation
PDE_02916	303.129	172.863	612.361	356.229	124.951	-1.27857	0.933199	2.73906e-07	5.61246e-06	2.73906e-07	5.61246e-06	hypothetical protein	K02882|1|7e-112|321|pcs:Pc16g09260|large subunit ribosomal protein L18Ae (A)	GO:0005840//ribosome	GO:0003735//structural constituent of ribosome	GO:0006412//translation
PDE_02957	24.1668	21.679	127.304	38.6513	9.65766	-1.32328	0.821161	2.44758e-05	0.000326265	2.44758e-05	0.000326265	hypothetical protein	K14708|1|0.0|1348|pcs:Pc16g10020|solute carrier family 26 (sodium-independent sulfate anion transporter), member 11 (A)	GO:0016021//integral component of membrane;GO:0016020//membrane	GO:0008271//secondary active sulfate transmembrane transporter activity;GO:0015116//sulfate transmembrane transporter activity;GO:0008271//secondary active sulfate transmembrane transporter activity	GO:0008272//sulfate transport;GO:0008272//sulfate transport;GO:0008272//sulfate transport;GO:0055085//transmembrane transport
PDE_02971	257.813	148.556	508.879	298.987	112.432	-1.19727	0.927777	1.82849e-06	3.18534e-05	1.82849e-06	3.18534e-05	hypothetical protein	K02941|1|1e-165|466|act:ACLA_029570|large subunit ribosomal protein LP0 (A)	GO:0005622//intracellular;GO:0005622//intracellular;GO:0005840//ribosome	GO:0003735//structural constituent of ribosome	GO:0042254//ribosome biogenesis;GO:0006414//translational elongation
PDE_03005	335.664	225.759	639.393	341.386	148.399	-1.17754	0.928226	6.39152e-06	9.77568e-05	6.39152e-06	9.77568e-05	hypothetical protein	K02870|1|4e-111|316|nfi:NFIA_021260|large subunit ribosomal protein L12e (A)	GO:0005840//ribosome;GO:0005840//ribosome	GO:0003735//structural constituent of ribosome;GO:0003735//structural constituent of ribosome	GO:0006412//translation;GO:0006412//translation
PDE_03013	609.306	297.472	1146.58	538.932	174.036	-1.80778	0.955679	1.55342e-15	1.24934e-13	1.55342e-15	1.24934e-13	hypothetical protein	K02905|1|7e-40|129|act:ACLA_031290|large subunit ribosomal protein L29e (A)	GO:0005622//intracellular;GO:0005840//ribosome	GO:0003735//structural constituent of ribosome	GO:0006412//translation
PDE_03149	25.6692	15.9693	27.9889	25.1373	10.6488	-1.26935	0.823354	0.00211493	0.0142836	0.00211493	0.0142836	hypothetical protein	-	GO:0016021//integral component of membrane	-	-
PDE_03178	252.74	151.436	499.78	313.456	111.406	-1.18183	0.925567	2.71348e-06	4.53862e-05	2.71348e-06	4.53862e-05	hypothetical protein	K02925|1|0.0|773|pcs:Pc20g14180|large subunit ribosomal protein L3e (A)	GO:0005622//intracellular;GO:0005840//ribosome	GO:0003735//structural constituent of ribosome	GO:0006412//translation
PDE_03397	317.512	178.08	489.193	284.92	127.766	-1.31331	0.935288	9.57317e-08	2.14862e-06	9.57317e-08	2.14862e-06	hypothetical protein	K02896|1|5e-86|253|pbl:PAAG_00205|large subunit ribosomal protein L24e (A)	-	-	-
PDE_03512	331.624	187.495	679.46	402.769	142.069	-1.22296	0.93142	1.67624e-06	2.936e-05	1.67624e-06	2.936e-05	hypothetical protein	K02875|1|1e-93|271|pcs:Pc20g13260|large subunit ribosomal protein L14e (A)	GO:0005622//intracellular;GO:0005840//ribosome	GO:0003735//structural constituent of ribosome	GO:0006412//translation
PDE_03617	54.642	37.3745	64.3751	33.5454	26.9004	-1.02238	0.86196	0.000459013	0.00404191	0.000459013	0.00404191	hypothetical protein	K01379|5|6e-133|396|afm:AFUA_4G07040|cathepsin D [EC:3.4.23.5] (A)	-	GO:0004190//aspartic-type endopeptidase activity;GO:0004190//aspartic-type endopeptidase activity;GO:0004190//aspartic-type endopeptidase activity;GO:0004190//aspartic-type endopeptidase activity;GO:0004190//aspartic-type endopeptidase activity;GO:0004190//aspartic-type endopeptidase activity;GO:0004190//aspartic-type endopeptidase activity	GO:0006508//proteolysis;GO:0006508//proteolysis;GO:0006508//proteolysis;GO:0006508//proteolysis;GO:0006508//proteolysis;GO:0006508//proteolysis;GO:0006508//proteolysis
PDE_03668	282.013	157.034	596.793	297.759	82.3328	-1.77622	0.949031	3.47764e-14	2.46785e-12	3.47764e-14	2.46785e-12	hypothetical protein	K02920|1|3e-64|193|ang:ANI_1_384184|large subunit ribosomal protein L36e (A)	GO:0005622//intracellular;GO:0005840//ribosome;GO:0005622//intracellular;GO:0005840//ribosome	GO:0003735//structural constituent of ribosome;GO:0003735//structural constituent of ribosome	GO:0006412//translation;GO:0006412//translation
PDE_03752	121.279	97.7328	144.743	123.046	59.8953	-1.01781	0.897545	0.000507736	0.00441059	0.000507736	0.00441059	hypothetical protein	K03248|1|0.0|503|afv:AFLA_044710|translation initiation factor 3 subunit G (A)	GO:0005737//cytoplasm;GO:0005852//eukaryotic translation initiation factor 3 complex	GO:0003676//nucleic acid binding;GO:0003676//nucleic acid binding;GO:0003743//translation initiation factor activity;GO:0003676//nucleic acid binding	-
PDE_03779	494.227	306.381	970.572	487.997	167.469	-1.56128	0.94784	1.758e-11	8.44101e-10	1.758e-11	8.44101e-10	hypothetical protein	K02943|1|2e-34|118|cpw:CPC735_038900|large subunit ribosomal protein LP2 (A)	GO:0005622//intracellular;GO:0005840//ribosome;GO:0005622//intracellular;GO:0005840//ribosome	GO:0003735//structural constituent of ribosome;GO:0003735//structural constituent of ribosome	GO:0006414//translational elongation;GO:0006414//translational elongation
PDE_03780	466.57	272.72	890.489	537.634	194.748	-1.26048	0.936307	3.68123e-07	7.43255e-06	3.68123e-07	7.43255e-06	hypothetical protein	K02958|1|2e-108|308|pcs:Pc22g20260|small subunit ribosomal protein S15e (A)	GO:0005840//ribosome;GO:0005840//ribosome;GO:0005840//ribosome;GO:0005840//ribosome;GO:0015935//small ribosomal subunit;GO:0005840//ribosome	GO:0003723//RNA binding;GO:0003735//structural constituent of ribosome;GO:0003735//structural constituent of ribosome;GO:0003735//structural constituent of ribosome;GO:0003735//structural constituent of ribosome;GO:0003735//structural constituent of ribosome;GO:0003735//structural constituent of ribosome	GO:0006412//translation;GO:0006412//translation;GO:0006412//translation;GO:0006412//translation;GO:0006412//translation;GO:0006412//translation
PDE_03793	433.424	255.651	843.423	460.32	181.041	-1.25946	0.935789	3.91787e-07	7.86099e-06	3.91787e-07	7.86099e-06	hypothetical protein	K02962|1|6e-99|283|pcs:Pc22g20470|small subunit ribosomal protein S17e (A)	GO:0005622//intracellular;GO:0005840//ribosome;GO:0005622//intracellular;GO:0005840//ribosome;GO:0005622//intracellular;GO:0005840//ribosome	GO:0003735//structural constituent of ribosome;GO:0003735//structural constituent of ribosome;GO:0003735//structural constituent of ribosome	GO:0006412//translation;GO:0006412//translation;GO:0006412//translation
PDE_03807	342.068	208.536	546.501	368.391	155.414	-1.13817	0.92662	1.40089e-05	0.00020119	1.40089e-05	0.00020119	hypothetical protein	K02955|1|1e-92|268|act:ACLA_069460|small subunit ribosomal protein S14e (A)	GO:0005840//ribosome;GO:0005840//ribosome	GO:0003735//structural constituent of ribosome;GO:0003735//structural constituent of ribosome	GO:0006412//translation;GO:0006412//translation
PDE_03816	23.197	6.76854	65.2799	70.135	5.82954	-1.99248	0.85609	1.58224e-09	5.05634e-08	1.58224e-09	5.05634e-08	hypothetical protein	-	GO:0016021//integral component of membrane	GO:0022857//transmembrane transporter activity	GO:0055085//transmembrane transport
PDE_03843	439.813	252.817	870.868	542.711	162.488	-1.43656	0.942747	1.33374e-09	4.31945e-08	1.33374e-09	4.31945e-08	hypothetical protein	K02960|1|3e-98|282|afm:AFUA_2G10500|small subunit ribosomal protein S16e (A)	GO:0005840//ribosome;GO:0005840//ribosome	GO:0003735//structural constituent of ribosome;GO:0003735//structural constituent of ribosome	GO:0006412//translation;GO:0006412//translation
PDE_03949	20.67	11.9573	19.4624	13.4007	8.05372	-1.35981	0.806502	0.000216945	0.00212994	0.000216945	0.00212994	hypothetical protein	K10703|1|2e-122|351|pcs:Pc22g12490|very-long-chain (3R)-3-hydroxyacyl-CoA dehydratase [EC:4.2.1.134] (A)	-	-	-
PDE_04060	301.468	171.459	570.199	342.644	112.852	-1.41757	0.939242	4.10405e-09	1.20757e-07	4.10405e-09	1.20757e-07	hypothetical protein	K02883|1|1e-125|354|pcs:Pc13g05540|large subunit ribosomal protein L18e (A)	GO:0005622//intracellular;GO:0005840//ribosome	GO:0003735//structural constituent of ribosome	GO:0006412//translation
PDE_04132	403.437	225.023	801.721	406.604	129.429	-1.64019	0.949066	2.64134e-13	1.6553e-11	2.64134e-13	1.6553e-11	hypothetical protein	K02929|1|1e-68|207|nfi:NFIA_083820|large subunit ribosomal protein L44e (A)	GO:0005622//intracellular;GO:0005840//ribosome;GO:0005622//intracellular;GO:0005840//ribosome	GO:0003735//structural constituent of ribosome;GO:0003735//structural constituent of ribosome	GO:0006412//translation;GO:0006412//translation
PDE_04547	26.4436	21.167	38.2883	57.2815	12.1666	-1.11999	0.811181	0.000723077	0.00585438	0.000723077	0.00585438	hypothetical protein	K14820|1|0.0|586|pcs:Pc22g22040|ribosome biogenesis protein BRX1 (A)	-	-	-
PDE_04825	237.172	150.22	513.001	255.345	84.1014	-1.49573	0.938965	1.23986e-09	4.05622e-08	1.23986e-09	4.05622e-08	hypothetical protein	K02891|1|1e-75|223|ure:UREG_04581|large subunit ribosomal protein L22e (A)	GO:0005622//intracellular;GO:0005840//ribosome	GO:0003735//structural constituent of ribosome	GO:0006412//translation
PDE_04897	1092.86	704.627	1989.07	1259.08	513.631	-1.0893	0.930436	2.25724e-05	0.000305963	2.25724e-05	0.000305963	hypothetical protein	K02977|1|7e-111|315|pcs:Pc13g09510|small subunit ribosomal protein S27Ae (A)	GO:0005622//intracellular;GO:0005840//ribosome	GO:0005515//protein binding;GO:0003735//structural constituent of ribosome;GO:0005515//protein binding	GO:0006412//translation
PDE_04970	56.5282	39.6329	90.2633	131.725	25.3275	-1.15826	0.880175	2.48325e-05	0.000330563	2.48325e-05	0.000330563	hypothetical protein	K14564|1|0.0|870|nfi:NFIA_067690|nucleolar protein 56 (A)	-	-	-
PDE_05035	168.649	92.2717	299.516	180.925	65.8549	-1.35666	0.929659	2.03109e-08	5.2133e-07	2.03109e-08	5.2133e-07	hypothetical protein	K13199|1|4e-123|359|pcs:Pc18g00860|plasminogen activator inhibitor 1 RNA-binding protein (A)	-	-	-
PDE_05108	202.331	107.874	414.747	209.273	70.376	-1.52356	0.938137	2.94838e-11	1.36148e-09	2.94838e-11	1.36148e-09	hypothetical protein	K02998|2|0.0|535|pcs:Pc13g14510|small subunit ribosomal protein SAe (A)	GO:0005622//intracellular;GO:0005840//ribosome;GO:0005622//intracellular;GO:0005840//ribosome;GO:0005622//intracellular;GO:0005840//ribosome;GO:0005622//intracellular;GO:0005840//ribosome;GO:0005622//intracellular;GO:0005840//ribosome;GO:0005622//intracellular;GO:0005840//ribosome;GO:0015935//small ribosomal subunit;GO:0005622//intracellular;GO:0005840//ribosome;GO:0005622//intracellular;GO:00058…	GO:0003735//structural constituent of ribosome;GO:0003735//structural constituent of ribosome;GO:0003735//structural constituent of ribosome;GO:0003735//structural constituent of ribosome;GO:0003735//structural constituent of ribosome;GO:0003735//structural constituent of ribosome;GO:0003735//structural constituent of ribosome;GO:0003735//structural constituent of ribosome;GO:0003735//structural …	GO:0006412//translation;GO:0006412//translation;GO:0006412//translation;GO:0006412//translation;GO:0006412//translation;GO:0006412//translation;GO:0006412//translation;GO:0006412//translation;GO:0006412//translation;GO:0006412//translation;GO:0006412//translation
PDE_05114	35.1542	25.272	58.82	94.079	16.7541	-1.06918	0.835733	0.000300268	0.00280163	0.000300268	0.00280163	hypothetical protein	K14565|1|0.0|828|act:ACLA_041100|nucleolar protein 58 (A)	-	-	-
PDE_05144	381.743	209.405	722.772	406.223	135.693	-1.49225	0.94323	1.23335e-10	4.91863e-09	1.23335e-10	4.91863e-09	hypothetical protein	K02993|1|2e-136|383|pcs:Pc18g00610|small subunit ribosomal protein S7e (A)	GO:0005622//intracellular;GO:0005840//ribosome;GO:0005622//intracellular;GO:0005840//ribosome	GO:0003735//structural constituent of ribosome;GO:0003735//structural constituent of ribosome	GO:0006412//translation;GO:0006412//translation
PDE_05203	427.344	229.901	897.456	529.692	166.102	-1.36333	0.940105	1.13365e-08	3.06466e-07	1.13365e-08	3.06466e-07	hypothetical protein	K02949|1|9e-113|320|nfi:NFIA_080930|small subunit ribosomal protein S11e (A)	GO:0005622//intracellular;GO:0005840//ribosome;GO:0005622//intracellular;GO:0005840//ribosome;GO:0005622//intracellular;GO:0005840//ribosome;GO:0005622//intracellular;GO:0005840//ribosome;GO:0005622//intracellular;GO:0005840//ribosome;GO:0005622//intracellular;GO:0005840//ribosome	GO:0003735//structural constituent of ribosome;GO:0003735//structural constituent of ribosome;GO:0003735//structural constituent of ribosome;GO:0003735//structural constituent of ribosome;GO:0003735//structural constituent of ribosome;GO:0003735//structural constituent of ribosome	GO:0006412//translation;GO:0006412//translation;GO:0006412//translation;GO:0006412//translation;GO:0006412//translation;GO:0006412//translation
PDE_05253	301.184	178.624	618.741	307.389	101.99	-1.56222	0.943783	3.75827e-11	1.67148e-09	3.75827e-11	1.67148e-09	hypothetical protein	K02915|1|1e-78|231|ang:ANI_1_920064|large subunit ribosomal protein L34e (A)	GO:0005622//intracellular;GO:0005840//ribosome;GO:0005622//intracellular;GO:0005840//ribosome;GO:0005622//intracellular;GO:0005840//ribosome;GO:0005622//intracellular;GO:0005840//ribosome;GO:0005622//intracellular;GO:0005840//ribosome	GO:0003735//structural constituent of ribosome;GO:0003735//structural constituent of ribosome;GO:0003735//structural constituent of ribosome;GO:0003735//structural constituent of ribosome;GO:0003735//structural constituent of ribosome	GO:0006412//translation;GO:0006412//translation;GO:0006412//translation;GO:0006412//translation;GO:0006412//translation
PDE_05292	263.629	144.135	557.995	291.413	82.1017	-1.68303	0.946165	4.35806e-13	2.6124e-11	4.35806e-13	2.6124e-11	hypothetical protein	K02894|1|4e-92|266|pcs:Pc18g03860|large subunit ribosomal protein L23e (A)	GO:0005840//ribosome	GO:0003735//structural constituent of ribosome	GO:0006412//translation
PDE_05315	671.55	400.33	1387.06	585.512	185.446	-1.8565	0.956542	3.96013e-17	3.74698e-15	3.96013e-17	3.74698e-15	hypothetical protein	K02971|1|2e-58|177|ani:AN3823.2|small subunit ribosomal protein S21e (A)	GO:0005622//intracellular;GO:0005840//ribosome;GO:0005622//intracellular;GO:0005840//ribosome	GO:0003735//structural constituent of ribosome;GO:0003735//structural constituent of ribosome	GO:0006412//translation;GO:0006412//translation
PDE_05375	38.9677	34.6093	51.5613	109.474	14.2945	-1.44682	0.87636	0.00144855	0.0105509	0.00144855	0.0105509	hypothetical protein	K02896|1|2e-120|342|pcs:Pc18g05370|large subunit ribosomal protein L24e (A)	-	-	-
PDE_05635	453.099	242.071	843.319	465.887	154.875	-1.54872	0.947029	8.64533e-11	3.62765e-09	8.64533e-11	3.62765e-09	hypothetical protein	K02923|1|2e-42|135|afv:AFLA_111980|large subunit ribosomal protein L38e (A)	GO:0005622//intracellular;GO:0005840//ribosome	GO:0003735//structural constituent of ribosome	GO:0006412//translation
PDE_05649	399.533	219.036	832.932	533.109	153.462	-1.38043	0.939967	6.57198e-09	1.83313e-07	6.57198e-09	1.83313e-07	hypothetical protein	K02868|1|3e-122|345|afm:AFUA_4G07730|large subunit ribosomal protein L11e (A)	GO:0005840//ribosome;GO:0005840//ribosome;GO:0005622//intracellular;GO:0005840//ribosome	GO:0003735//structural constituent of ribosome;GO:0003735//structural constituent of ribosome;GO:0003735//structural constituent of ribosome	GO:0006412//translation;GO:0006412//translation;GO:0006412//translation
PDE_05678	304.548	167.974	651.262	435.425	123.028	-1.30768	0.93477	6.39133e-08	1.48633e-06	6.39133e-08	1.48633e-06	hypothetical protein	K02937|1|1e-154|436|afm:AFUA_4G03880|large subunit ribosomal protein L7e (A)	-	-	-
PDE_05730	36.44	25.4365	66.4078	51.5675	15.5084	-1.23247	0.855105	0.000152193	0.00158449	0.000152193	0.00158449	hypothetical protein	K07101|1|2e-134|379|afv:AFLA_115200|(A)	-	-	GO:0009116//nucleoside metabolic process
PDE_05774	226.892	136.356	405.523	286.653	95.8701	-1.24285	0.928174	6.70699e-07	1.292e-05	6.70699e-07	1.292e-05	hypothetical protein	K02873|1|2e-125|357|pcs:Pc13g06740|large subunit ribosomal protein L13e (A)	GO:0005622//intracellular;GO:0005840//ribosome;GO:0005622//intracellular;GO:0005840//ribosome	GO:0003735//structural constituent of ribosome;GO:0003735//structural constituent of ribosome	GO:0006412//translation;GO:0006412//translation
PDE_05808	112.983	67.2434	108.703	113.569	54.3076	-1.05688	0.900618	0.000334516	0.00306592	0.000334516	0.00306592	hypothetical protein	K07750|1|8e-163|457|pcs:Pc13g05570|methylsterol monooxygenase [EC:1.14.13.72] (A)	-	GO:0005506//iron ion binding;GO:0016491//oxidoreductase activity	GO:0006633//fatty acid biosynthetic process;GO:0055114//oxidation-reduction process
PDE_05871	372.804	254.06	686.885	475.386	185.899	-1.0039	0.913464	0.000476547	0.00417726	0.000476547	0.00417726	hypothetical protein	K02974|1|6e-90|260|pcs:Pc21g12010|small subunit ribosomal protein S24e (A)	GO:0005622//intracellular;GO:0005840//ribosome	GO:0003735//structural constituent of ribosome	GO:0006412//translation
PDE_05983	284.482	155.888	612.226	325.243	109.103	-1.38265	0.936997	3.38033e-09	1.01576e-07	3.38033e-09	1.01576e-07	hypothetical protein	K02981|1|7e-160|447|afv:AFLA_117990|small subunit ribosomal protein S2e (A)	GO:0005840//ribosome;GO:0005840//ribosome;GO:0005840//ribosome;GO:0015935//small ribosomal subunit	GO:0003723//RNA binding;GO:0003735//structural constituent of ribosome;GO:0003735//structural constituent of ribosome;GO:0003723//RNA binding;GO:0003735//structural constituent of ribosome;GO:0003735//structural constituent of ribosome	GO:0006412//translation;GO:0006412//translation;GO:0006412//translation;GO:0006412//translation
PDE_06265	51.3685	31.9064	56.704	34.0221	21.2663	-1.27231	0.883214	1.17955e-06	2.15695e-05	1.17955e-06	2.15695e-05	hypothetical protein	K05917|1|0.0|901|pcs:Pc20g09070|sterol 14-demethylase [EC:1.14.13.70] (A)	-	-	-
PDE_06333	122.832	65.8682	237.361	271.565	56.0533	-1.13182	0.910166	7.63513e-05	0.00088142	7.63513e-05	0.00088142	hypothetical protein	-	-	-	-
PDE_06703	354.026	200.379	676.695	436.885	135.749	-1.38292	0.939052	5.09694e-09	1.45105e-07	5.09694e-09	1.45105e-07	hypothetical protein	K02991|1|1e-153|430|afv:AFLA_026830|small subunit ribosomal protein S6e (A)	GO:0005622//intracellular;GO:0005840//ribosome;GO:0005622//intracellular;GO:0005840//ribosome	GO:0003735//structural constituent of ribosome;GO:0003735//structural constituent of ribosome	GO:0006412//translation;GO:0006412//translation
PDE_06755	620.043	365.259	1212.33	790.28	250.624	-1.30685	0.940485	4.49983e-08	1.08299e-06	4.49983e-08	1.08299e-06	hypothetical protein	K02973|1|9e-36|125|pcs:Pc16g02610|small subunit ribosomal protein S23e (A)	GO:0005622//intracellular;GO:0005840//ribosome	GO:0003735//structural constituent of ribosome	GO:0006412//translation
PDE_06792	313.338	168.208	611.966	360.214	122.035	-1.36043	0.937515	1.32575e-08	3.53448e-07	1.32575e-08	3.53448e-07	hypothetical protein	K02940|1|1e-128|363|afv:AFLA_088370|large subunit ribosomal protein L9e (A)	GO:0005622//intracellular;GO:0005840//ribosome;GO:0005840//ribosome;GO:0005840//ribosome	GO:0003735//structural constituent of ribosome;GO:0003735//structural constituent of ribosome;GO:0019843//rRNA binding;GO:0003735//structural constituent of ribosome;GO:0019843//rRNA binding	GO:0006412//translation;GO:0006412//translation;GO:0006412//translation
PDE_07189	328.855	161.585	628.851	307.952	105.003	-1.64702	0.947961	4.05503e-13	2.46133e-11	4.05503e-13	2.46133e-11	hypothetical protein	K02918|1|2e-73|221|ang:ANI_1_1772074|large subunit ribosomal protein L35e (A)	-	-	-
PDE_07328	31.5667	24.174	40.696	53.7304	15.4664	-1.02927	0.817362	0.0192766	0.0819915	0.0192766	0.0819915	hypothetical protein	K14815|1|2e-150|422|pcs:Pc21g03380|mRNA turnover protein 4 (A)	-	-	-
PDE_07364	22.7068	13.3729	19.4584	13.612	9.7514	-1.21944	0.80431	0.000288439	0.00271848	0.000288439	0.00271848	hypothetical protein	-	-	-	-
PDE_07406	61.2573	53.1183	82.703	98.5384	28.0753	-1.12558	0.882921	0.00102339	0.00789223	0.00102339	0.00789223	hypothetical protein	-	-	-	-
PDE_07766	31.6122	30.1715	29.854	33.5205	13.8625	-1.1893	0.838444	6.14904e-05	0.000723426	6.14904e-05	0.000723426	hypothetical protein	K09503|1|0.0|606|nfi:NFIA_091540|DnaJ homolog subfamily A member 2 (A)	-	GO:0005524//ATP binding;GO:0051082//unfolded protein binding;GO:0031072//heat shock protein binding;GO:0051082//unfolded protein binding;GO:0031072//heat shock protein binding;GO:0051082//unfolded protein binding	GO:0006457//protein folding;GO:0009408//response to heat
PDE_07774	566.765	312.825	1097.37	752.749	216.188	-1.39047	0.943748	4.50353e-09	1.30521e-07	4.50353e-09	1.30521e-07	hypothetical protein	K02912|1|2e-77|229|pcs:Pc21g01520|large subunit ribosomal protein L32e (A)	GO:0005622//intracellular;GO:0005840//ribosome;GO:0005622//intracellular;GO:0005840//ribosome	GO:0003735//structural constituent of ribosome;GO:0003735//structural constituent of ribosome	GO:0006412//translation;GO:0006412//translation
PDE_07853	285.347	163.303	615.211	296.563	99.4107	-1.52124	0.941814	6.05208e-10	2.10861e-08	6.05208e-10	2.10861e-08	hypothetical protein	K02921|1|5e-59|179|ang:ANI_1_1328184|large subunit ribosomal protein L37Ae (A)	GO:0005622//intracellular;GO:0005840//ribosome;GO:0005622//intracellular;GO:0005840//ribosome;GO:0005622//intracellular;GO:0005840//ribosome	GO:0003735//structural constituent of ribosome;GO:0003735//structural constituent of ribosome;GO:0003735//structural constituent of ribosome	GO:0006412//translation;GO:0006412//translation;GO:0006412//translation
PDE_08100	760.069	438.725	1546.52	1021.2	291.303	-1.38361	0.944145	3.14197e-09	9.50569e-08	3.14197e-09	9.50569e-08	hypothetical protein	K02964|1|3e-107|306|pcs:Pc22g00880|small subunit ribosomal protein S18e (A)	GO:0005622//intracellular;GO:0005840//ribosome;GO:0005840//ribosome;GO:0005622//intracellular;GO:0005840//ribosome;GO:0005622//intracellular;GO:0005840//ribosome	GO:0003723//RNA binding;GO:0003735//structural constituent of ribosome;GO:0003723//RNA binding;GO:0003735//structural constituent of ribosome;GO:0003723//RNA binding;GO:0003735//structural constituent of ribosome;GO:0003723//RNA binding;GO:0003735//structural constituent of ribosome	GO:0006412//translation;GO:0006412//translation;GO:0006412//translation;GO:0006412//translation
PDE_08142	509.087	306.023	953.018	583.437	208.952	-1.28474	0.937601	1.38244e-07	3.01854e-06	1.38244e-07	3.01854e-06	hypothetical protein	K02910|1|2e-74|220|pcs:Pc22g01480|large subunit ribosomal protein L31e (A)	GO:0005622//intracellular;GO:0005840//ribosome	GO:0003735//structural constituent of ribosome	GO:0006412//translation
PDE_08174	277.304	151.53	581.048	378.201	106.694	-1.37799	0.936617	8.63652e-09	2.35455e-07	8.63652e-09	2.35455e-07	hypothetical protein	K02936|1|2e-178|495|pcs:Pc22g02060|large subunit ribosomal protein L7Ae (A)	GO:0030529//ribonucleoprotein complex	-	GO:0042254//ribosome biogenesis
PDE_08205	451.058	244.154	921.818	460.436	150.334	-1.58514	0.947978	1.1742e-10	4.72174e-09	1.1742e-10	4.72174e-09	hypothetical protein	K02980|1|6e-35|115|pcs:Pc22g01560|small subunit ribosomal protein S29e (A)	GO:0005622//intracellular;GO:0005840//ribosome;GO:0005622//intracellular;GO:0005840//ribosome	GO:0003735//structural constituent of ribosome;GO:0003735//structural constituent of ribosome	GO:0006412//translation;GO:0006412//translation
PDE_08216	472.475	246.039	875.676	510.009	164.526	-1.52192	0.946113	2.60974e-11	1.21674e-09	2.60974e-11	1.21674e-09	hypothetical protein	K02947|1|2e-91|268|cpw:CPC735_047820|small subunit ribosomal protein S10e (A)	-	-	-
PDE_08230	88.3347	50.6962	91.0599	102.044	36.8853	-1.25993	0.90837	6.26364e-06	9.5953e-05	6.26364e-06	9.5953e-05	hypothetical protein	K11187|1|2e-106|306|pcs:Pc22g04430|peroxiredoxin 5, atypical 2-Cys peroxiredoxin [EC:1.11.1.15] (A)	-	GO:0016491//oxidoreductase activity	-
PDE_08272	80.5944	58.9207	92.8756	97.6412	29.9824	-1.42657	0.913706	8.29339e-08	1.88772e-06	8.29339e-08	1.88772e-06	hypothetical protein	K11128|1|2e-70|216|ang:ANI_1_1280014|H/ACA ribonucleoprotein complex subunit 1 (A)	-	-	GO:0001522//pseudouridine synthesis;GO:0042254//ribosome biogenesis
PDE_08338	328.844	187.845	722.095	433.295	135.859	-1.2753	0.934079	1.58145e-07	3.38417e-06	1.58145e-07	3.38417e-06	hypothetical protein	K14753|1|0.0|643|pcs:Pc22g03140|guanine nucleotide-binding protein subunit beta-2-like 1 protein (A)	-	GO:0005515//protein binding;GO:0005515//protein binding;GO:0005515//protein binding;GO:0005515//protein binding;GO:0005515//protein binding;GO:0005515//protein binding;GO:0005515//protein binding;GO:0005515//protein binding;GO:0005515//protein binding;GO:0005515//protein binding;GO:0005515//protein binding;GO:0005515//protein binding;GO:0005515//protein binding;GO:0005515//protein binding;GO:0005…	-
PDE_08996	37.0129	26.1347	61.759	74.6726	17.9236	-1.04617	0.837132	0.00053248	0.00458427	0.00053248	0.00458427	hypothetical protein	K14826|1|0.0|520|pcs:Pc12g11330|FK506-binding nuclear protein [EC:5.2.1.8] (A)	-	-	GO:0006457//protein folding;GO:0006457//protein folding
PDE_09048	120.09	84.4188	163.057	142.816	44.1228	-1.44451	0.925912	1.30187e-09	4.23043e-08	1.30187e-09	4.23043e-08	hypothetical protein	K01940|1|0.0|803|pcs:Pc12g11190|argininosuccinate synthase [EC:6.3.4.5] (A)	-	GO:0004055//argininosuccinate synthase activity;GO:0005524//ATP binding;GO:0004055//argininosuccinate synthase activity;GO:0005524//ATP binding;GO:0004055//argininosuccinate synthase activity;GO:0005524//ATP binding;GO:0004055//argininosuccinate synthase activity;GO:0004055//argininosuccinate synthase activity;GO:0005524//ATP binding	GO:0006526//arginine biosynthetic process;GO:0006526//arginine biosynthetic process;GO:0006526//arginine biosynthetic process;GO:0006526//arginine biosynthetic process
PDE_09135	138.972	120.825	133.58	338.42	59.3494	-1.22749	0.919507	1.43938e-06	2.58205e-05	1.43938e-06	2.58205e-05	hypothetical protein	K01647|1|0.0|918|pcs:Pc12g05400|citrate synthase [EC:2.3.3.1] (A)	-	GO:0004108//citrate (Si)-synthase activity;GO:0046912//transferase activity, transferring acyl groups, acyl groups converted into alkyl on transfer;GO:0046912//transferase activity, transferring acyl groups, acyl groups converted into alkyl on transfer;GO:0046912//transferase activity, transferring acyl groups, acyl groups converted into alkyl on transfer;GO:0046912//transferase activity, transfe…	GO:0044262//cellular carbohydrate metabolic process;GO:0006099//tricarboxylic acid cycle;GO:0044262//cellular carbohydrate metabolic process;GO:0044262//cellular carbohydrate metabolic process;GO:0044262//cellular carbohydrate metabolic process;GO:0044262//cellular carbohydrate metabolic process;GO:0044262//cellular carbohydrate metabolic process;GO:0044262//cellular carbohydrate metabolic proces…
PDE_09149	468.375	465.181	560.134	2104	209.283	-1.16221	0.93035	3.78463e-06	6.14906e-05	3.78463e-06	6.14906e-05	hypothetical protein	K04079|1|0.0|1208|abe:ARB_01274|molecular chaperone HtpG (A)	-	GO:0005524//ATP binding;GO:0051082//unfolded protein binding;GO:0005524//ATP binding;GO:0051082//unfolded protein binding;GO:0005524//ATP binding;GO:0051082//unfolded protein binding;GO:0005524//ATP binding	GO:0006457//protein folding;GO:0006950//response to stress;GO:0006457//protein folding;GO:0006950//response to stress;GO:0006457//protein folding;GO:0006950//response to stress
PDE_09174	346.946	219.354	602.331	408.85	159.742	-1.11897	0.925602	2.57691e-05	0.000340293	2.57691e-05	0.000340293	hypothetical protein	K02953|1|7e-103|295|nfi:NFIA_026490|small subunit ribosomal protein S13e (A)	GO:0005622//intracellular;GO:0005840//ribosome;GO:0005840//ribosome;GO:0005622//intracellular;GO:0005840//ribosome	GO:0003735//structural constituent of ribosome;GO:0003735//structural constituent of ribosome;GO:0003735//structural constituent of ribosome	GO:0006412//translation;GO:0006412//translation;GO:0006412//translation
PDE_09361	572.5	294.369	1032.26	579.444	214.183	-1.41843	0.944404	5.41369e-10	1.90685e-08	5.41369e-10	1.90685e-08	hypothetical protein	K02938|1|1e-177|492|act:ACLA_009680|large subunit ribosomal protein L8e (A)	GO:0005840//ribosome;GO:0005840//ribosome;GO:0005622//intracellular;GO:0005840//ribosome	GO:0003735//structural constituent of ribosome;GO:0003735//structural constituent of ribosome;GO:0003735//structural constituent of ribosome	GO:0006412//translation;GO:0006412//translation;GO:0006412//translation
PDE_09443	223.602	130.225	403.791	308.297	97.2027	-1.20186	0.925982	1.38799e-06	2.49917e-05	1.38799e-06	2.49917e-05	hypothetical protein	K02930|1|0.0|630|ang:ANI_1_1460084|large subunit ribosomal protein L4e (A)	GO:0005840//ribosome	GO:0003735//structural constituent of ribosome	GO:0006412//translation
PDE_09553	120.094	113.326	151.16	144.96	51.8091	-1.21289	0.915001	0.000188301	0.00190093	0.000188301	0.00190093	hypothetical protein	K11130|1|5e-34|114|nfi:NFIA_038110|H/ACA ribonucleoprotein complex subunit 3 (A)	-	-	-
PDE_09605	34.0717	30.4116	55.4506	40.6416	14.1894	-1.26376	0.851929	1.68069e-06	2.93847e-05	1.68069e-06	2.93847e-05	hypothetical protein	-	-	-	-
PDE_09637	32.3501	15.8393	36.59	12.7749	10.8447	-1.57678	0.869039	2.44925e-09	7.5914e-08	2.44925e-09	7.5914e-08	hypothetical protein	-	-	-	-
PDE_09728	299.381	202.252	632.442	364.981	149.602	-1.00086	0.911444	0.000768709	0.00615158	0.000768709	0.00615158	hypothetical protein	K02908|1|2e-69|206|pcs:Pc21g18200|large subunit ribosomal protein L30e (A)	-	-	-
PDE_09965	29.8884	17.9901	35.1982	32.9491	14.0308	-1.09099	0.820781	0.000509213	0.00441944	0.000509213	0.00441944	hypothetical protein	K10756|1|0.0|711|pcs:Pc21g14450|replication factor C subunit 3/5 (A)	-	-	-

## Sheet: Group_3 7 genes
GeneID	Means (Wild-type on Cellulose)	Means (ΔclrB on Cellulose)	Means (ΔcreA on Cellulose)	Means (ΔcreA-ΔclrB on Cellulose)	Means (ΔamyR on Cellulose)	log2Ratio(ΔamyR/Wild-type)	Probability (ΔamyR/Wild-type)	P-value (ΔamyR/Wild-type)	FDR (ΔamyR/Wild-type)	Description	KEGG Orthology	GO Component	GO Function	GO Process
PDE_00121	12.847	2.70451	3.45074	5.74552	1.81726	-2.82159	0.80652	1.20731e-05	0.000176274	hypothetical protein	-	-	GO:0016791//phosphatase activity;GO:0016791//phosphatase activity	GO:0008152//metabolic process
PDE_02152	142.429	84.5066	87.5505	304.461	57.6453	-1.30497	0.923858	6.37733e-07	1.23342e-05	hypothetical protein	K00627|4|4e-57|193|pcs:Pc20g01630|pyruvate dehydrogenase E2 component (dihydrolipoamide acetyltransferase) [EC:2.3.1.12] (A)	-	-	-
PDE_02525	33.6959	18.4432	23.3003	31.8363	15.3305	-1.13616	0.83929	0.00225804	0.01505	hypothetical protein	-	-	-	-
PDE_04142	182.681	160.762	220.928	255.457	88.9544	-1.03819	0.911254	0.000148319	0.00154748	hypothetical protein	K00029|1|0.0|1090|pcs:Pc13g04510|malate dehydrogenase (oxaloacetate-decarboxylating)(NADP+) [EC:1.1.1.40] (A)	-	GO:0016616//oxidoreductase activity, acting on the CH-OH group of donors, NAD or NADP as acceptor;GO:0016619;GO:0051287//NAD binding;GO:0016616//oxidoreductase activity, acting on the CH-OH group of donors, NAD or NADP as acceptor;GO:0016619;GO:0051287//NAD binding;GO:0016616//oxidoreductase activity, acting on the CH-OH group of donors, NAD or NADP as acceptor;GO:0016619;GO:0016491//oxidoreducta…	GO:0055114//oxidation-reduction process;GO:0055114//oxidation-reduction process;GO:0055114//oxidation-reduction process;GO:0055114//oxidation-reduction process;GO:0006108//malate metabolic process;GO:0055114//oxidation-reduction process;GO:0006108//malate metabolic process;GO:0055114//oxidation-reduction process;GO:0006108//malate metabolic process;GO:0055114//oxidation-reduction process;GO:00061…
PDE_07700	36.9951	16.8877	20.6176	57.9804	14.8243	-1.31937	0.863376	0.000701771	0.0057251	hypothetical protein	-	-	-	-
PDE_08150	150.269	111.132	45.0899	269.483	63.4243	-1.24444	0.921631	4.07093e-07	8.15115e-06	hypothetical protein	K03317|1|0.0|924|pcs:Pc22g02350|concentrative nucleoside transporter, CNT family (A)	GO:0016020//membrane	GO:0005415//nucleoside:sodium symporter activity	GO:0006810//transport
PDE_09645	29.8882	20.6549	26.6696	47.219	13.938	-1.10056	0.821783	0.00199084	0.0136073	hypothetical protein	K01772|1|0.0|744|pcs:Pc22g15520|ferrochelatase [EC:4.99.1.1] (A)	-	-	-

## Sheet: Group_4 162 genes
GeneID	Means (Wild-type on Cellulose)	Means (ΔclrB on Cellulose)	Means (ΔcreA on Cellulose)	Means (ΔcreA-ΔclrB on Cellulose)	Means (ΔamyR on Cellulose)	log2Ratio(ΔamyR/Wild-type)	Probability (ΔamyR/Wild-type)	P-value (ΔamyR/Wild-type)	FDR (ΔamyR/Wild-type)	Description	KEGG Orthology	GO Component	GO Function	GO Process
PDE_00095	59.9606	45.8376	54.5398	19.8605	29.589	-1.01896	0.867658	0.0116952	0.0563286	hypothetical protein	-	-	-	-
PDE_00224	88.0966	71.1707	47.7086	73.5287	32.34	-1.44577	0.917211	1.72611e-09	5.44403e-08	hypothetical protein	-	-	GO:0016705//oxidoreductase activity, acting on paired donors, with incorporation or reduction of molecular oxygen;GO:0005506//iron ion binding;GO:0009055//electron carrier activity;GO:0016705//oxidoreductase activity, acting on paired donors, with incorporation or reduction of molecular oxygen;GO:0020037//heme binding;GO:0005506//iron ion binding;GO:0016705//oxidoreductase activity, acting on pai…	GO:0055114//oxidation-reduction process;GO:0055114//oxidation-reduction process;GO:0055114//oxidation-reduction process;GO:0055114//oxidation-reduction process;GO:0055114//oxidation-reduction process;GO:0055114//oxidation-reduction process;GO:0055114//oxidation-reduction process;GO:0055114//oxidation-reduction process;GO:0055114//oxidation-reduction process;GO:0055114//oxidation-reduction process…
PDE_00226	164.454	112.546	97.6963	129.861	54.6554	-1.58925	0.937463	6.78915e-12	3.48522e-10	hypothetical protein	-	-	-	-
PDE_00248	79.183	31.3558	41.8967	12.3165	20.5868	-1.94347	0.92959	1.64918e-09	5.2356e-08	SUN domain-containing protein	K01238|4|2e-162|472|afm:AFUA_1G13940|[EC:3.2.1.-] (A)	-	-	-
PDE_00253	36.4527	37.1398	25.8428	36.9899	16.6115	-1.13384	0.845644	0.000862666	0.00679086	hypothetical protein	-	-	-	-
PDE_00272	35.8863	30.9551	21.1724	28.1835	16.3213	-1.13668	0.844815	0.00434082	0.025876	hypothetical protein	-	-	-	-
PDE_00274	23.2056	14.9378	18.6653	17.1982	8.35267	-1.47416	0.828844	2.54116e-05	0.000336878	hypothetical protein	-	-	-	-
PDE_00400	798.024	287.445	690.317	314.561	246.017	-1.69768	0.954246	1.77356e-15	1.4146e-13	putative alpha-glucosidase	K01187|1|0.0|1297|afm:AFUA_1G16250|alpha-glucosidase [EC:3.2.1.20] (A)	-	GO:0004553//hydrolase activity, hydrolyzing O-glycosyl compounds;GO:0004553//hydrolase activity, hydrolyzing O-glycosyl compounds	GO:0005975//carbohydrate metabolic process;GO:0005975//carbohydrate metabolic process
PDE_00487	22.8263	17.051	15.1237	14.7563	9.50802	-1.26348	0.809282	0.000107153	0.00118404	hypothetical protein	-	-	-	-
PDE_00538	34.32	13.9893	10.5096	7.22201	9.8027	-1.8078	0.884526	4.09231e-08	9.94834e-07	hypothetical protein	-	-	GO:0003700//sequence-specific DNA binding transcription factor activity;GO:0043565//sequence-specific DNA binding	GO:0006355//regulation of transcription, DNA-templated
PDE_00592	27.9519	23.4527	11.9073	46.3204	10.8951	-1.35927	0.840792	0.00209231	0.0141622	hypothetical protein	-	GO:0016021//integral component of membrane	-	GO:0055085//transmembrane transport
PDE_00836	26.5395	2.5788	2.47002	1.10826	3.14174	-3.07851	0.889516	5.30072e-05	0.000635494	hypothetical protein	-	-	GO:0008270//zinc ion binding	-
PDE_00961	391.392	197.673	73.6998	148.476	180.426	-1.11721	0.926845	1.34026e-05	0.000193346	hypothetical protein	-	-	-	-
PDE_00963	27.7004	11.4026	15.5621	13.7187	4.98304	-2.47481	0.884406	3.66346e-11	1.63686e-09	hypothetical protein	K01288|5|0.0|825|afm:AFUA_8G04120|carboxypeptidase D [EC:3.4.16.6] (A)	-	GO:0004185//serine-type carboxypeptidase activity;GO:0004185//serine-type carboxypeptidase activity;GO:0004185//serine-type carboxypeptidase activity;GO:0004185//serine-type carboxypeptidase activity;GO:0004185//serine-type carboxypeptidase activity;GO:0004185//serine-type carboxypeptidase activity	GO:0006508//proteolysis;GO:0006508//proteolysis;GO:0006508//proteolysis;GO:0006508//proteolysis;GO:0006508//proteolysis;GO:0006508//proteolysis
PDE_00968	61.6822	59.9056	28.8727	52.5535	28.4889	-1.11445	0.880987	0.000146372	0.00153048	hypothetical protein	K00130|1|0.0|894|pcs:Pc22g10030|betaine-aldehyde dehydrogenase [EC:1.2.1.8] (A)	-	GO:0016491//oxidoreductase activity;GO:0016491//oxidoreductase activity;GO:0016491//oxidoreductase activity	GO:0008152//metabolic process;GO:0055114//oxidation-reduction process;GO:0008152//metabolic process;GO:0055114//oxidation-reduction process;GO:0008152//metabolic process;GO:0055114//oxidation-reduction process
PDE_01100	206.23	142.105	199.541	99.4769	94.9093	-1.11963	0.919697	0.000277751	0.00262545	hypothetical protein	-	-	-	-
PDE_01105	28.3318	20.6028	20.6363	25.1421	12.0314	-1.23561	0.831261	0.00167193	0.0118211	hypothetical protein	K11495|1|2e-87|256|pcs:Pc20g11740|histone H3-like centromeric protein A (A)	GO:0000786//nucleosome;GO:0000786//nucleosome;GO:0000786//nucleosome;GO:0000786//nucleosome;GO:0000786//nucleosome;GO:0000786//nucleosome	GO:0003677//DNA binding;GO:0003677//DNA binding;GO:0003677//DNA binding;GO:0003677//DNA binding;GO:0003677//DNA binding;GO:0003677//DNA binding;GO:0003677//DNA binding	GO:0006334//nucleosome assembly;GO:0006334//nucleosome assembly;GO:0006334//nucleosome assembly;GO:0006334//nucleosome assembly;GO:0006334//nucleosome assembly;GO:0006334//nucleosome assembly
PDE_01118	384.394	274.457	310.783	147.327	183.685	-1.06535	0.923081	0.000744509	0.00599771	hypothetical protein	-	-	-	-
PDE_01180	140.094	38.6159	26.4967	18.2907	56.1478	-1.31909	0.924169	1.57297e-07	3.37349e-06	hypothetical protein	-	-	-	-
PDE_01232	31.9611	22.0752	4.65206	26.9003	14.8104	-1.1097	0.829794	0.0673664	0.205031	hypothetical protein	-	-	-	-
PDE_01238	34.3633	21.2359	18.2662	12.881	14.9122	-1.20437	0.847647	8.21514e-05	0.000938276	hypothetical protein	K15385|1|7e-127|372|aor:AOR_1_492164|aspyridone synthetase trans-acting enoyl reductase (A)	-	GO:0016491//oxidoreductase activity;GO:0016747//transferase activity, transferring acyl groups other than amino-acyl groups;GO:0016491//oxidoreductase activity	GO:0055114//oxidation-reduction process
PDE_01331	1455.14	1064.49	712.09	847.471	532.321	-1.45079	0.948876	1.30491e-10	5.18261e-09	hypothetical protein	-	-	GO:0005515//protein binding	-
PDE_01353	380.302	124.997	204.649	109.936	58.2237	-2.70747	0.961376	1.78716e-42	1.07799e-39	hypothetical protein	K01279|1|0.0|894|pcs:Pc12g14680|tripeptidyl-peptidase I [EC:3.4.14.9] (A)	-	GO:0008236//serine-type peptidase activity;GO:0008236//serine-type peptidase activity;GO:0004252//serine-type endopeptidase activity	GO:0006508//proteolysis
PDE_01375	70.9192	68.9024	24.3386	37.6218	34.0314	-1.05931	0.883093	0.000553737	0.0047335	hypothetical protein	K01951|1|1e-107|315|afm:AFUA_4G03700|GMP synthase (glutamine-hydrolysing) [EC:6.3.5.2] (A)	-	-	-
PDE_01380	297.439	208.727	91.0346	214.49	133.928	-1.15113	0.925654	1.1105e-05	0.000163375	hypothetical protein	-	-	GO:0008080//N-acetyltransferase activity;GO:0008080//N-acetyltransferase activity	-
PDE_01390	28.821	21.2048	7.55584	6.81275	12.0044	-1.26356	0.835543	0.000191707	0.00192927	hypothetical protein	-	-	GO:0016491//oxidoreductase activity	GO:0008152//metabolic process
PDE_01627	191.045	136.059	116.515	260.224	87.9453	-1.11924	0.918402	8.20997e-05	0.000938276	hypothetical protein	-	-	-	-
PDE_01705	26.1646	20.1227	15.5886	14.6107	8.58958	-1.60696	0.851083	1.77458e-05	0.000246779	hypothetical protein	K00567|1|2e-59|185|afm:AFUA_2G02090|methylated-DNA-[protein]-cysteine S-methyltransferase [EC:2.1.1.63] (A)	-	GO:0003908//methylated-DNA-[protein]-cysteine S-methyltransferase activity;GO:0003824//catalytic activity;GO:0003824//catalytic activity	GO:0006281//DNA repair;GO:0006281//DNA repair;GO:0006281//DNA repair
PDE_01716	19.082	20.0366	21.6605	14.0548	4.10373	-2.2172	0.841863	6.57583e-10	2.26655e-08	hypothetical protein	K01895|1|0.0|775|pfj:MYCFIDRAFT_55238|acetyl-CoA synthetase [EC:6.2.1.1] (A)	-	GO:0003824//catalytic activity;GO:0016747//transferase activity, transferring acyl groups other than amino-acyl groups;GO:0003987//acetate-CoA ligase activity;GO:0016208//AMP binding	GO:0008152//metabolic process;GO:0019427//acetyl-CoA biosynthetic process from acetate
PDE_01717	61.9165	57.9996	56.3185	52.6015	13.5235	-2.19485	0.925999	1.25827e-09	4.10257e-08	hypothetical protein	-	-	GO:0045482//trichodiene synthase activity	GO:0016106//sesquiterpenoid biosynthetic process
PDE_01718	25.8396	30.4	28.8959	9.86106	5.07132	-2.34915	0.87598	1.36666e-10	5.38352e-09	hypothetical protein	K00787|1|2e-105|316|ang:ANI_1_1456024|farnesyl diphosphate synthase [EC:2.5.1.1 2.5.1.10] (A)	-	-	GO:0008299//isoprenoid biosynthetic process;GO:0008299//isoprenoid biosynthetic process;GO:0008299//isoprenoid biosynthetic process
PDE_01742	97.1083	53.5676	74.1987	66.9198	46.6586	-1.05745	0.895956	0.0369587	0.132913	hypothetical protein	-	-	-	-
PDE_01752	70.6527	33.4223	8.26393	27.6274	18.9854	-1.89586	0.924894	0.000464256	0.00408436	hypothetical protein	K06911|1|0.0|511|pcs:Pc13g13510|(A)	-	-	-
PDE_01762	29.0323	16.0006	25.8121	23.5092	11.0385	-1.39511	0.848027	7.49373e-08	1.71379e-06	hypothetical protein	-	-	-	-
PDE_01833	46.4692	41.6116	37.2079	22.1764	10.2096	-2.18635	0.913395	7.04967e-09	1.9607e-07	hypothetical protein	-	-	-	-
PDE_01834	60.4025	47.3488	48.4665	36.598	21.6836	-1.478	0.904296	4.19509e-09	1.22317e-07	hypothetical protein	K00993|1|0.0|679|pcs:Pc20g03110|ethanolaminephosphotransferase [EC:2.7.8.1] (A)	GO:0016020//membrane;GO:0016020//membrane	GO:0016780//phosphotransferase activity, for other substituted phosphate groups;GO:0016780//phosphotransferase activity, for other substituted phosphate groups	GO:0008654//phospholipid biosynthetic process;GO:0008654//phospholipid biosynthetic process
PDE_01855	34.3892	31.5323	28.1534	25.1686	13.3376	-1.36646	0.860751	5.03653e-06	7.92945e-05	hypothetical protein	-	-	-	-
PDE_01906	54.2726	52.8594	43.305	33.9337	21.4945	-1.33626	0.891226	2.955e-08	7.46564e-07	hypothetical protein	-	-	GO:0005515//protein binding;GO:0005515//protein binding;GO:0005515//protein binding;GO:0005515//protein binding;GO:0005515//protein binding;GO:0005515//protein binding;GO:0005515//protein binding;GO:0005515//protein binding;GO:0005515//protein binding;GO:0005515//protein binding	-
PDE_01913	46.3539	20.8783	7.43744	16.2071	12.7475	-1.86247	0.905383	0.00136608	0.0100565	hypothetical protein	-	GO:0016021//integral component of membrane	-	GO:0055085//transmembrane transport
PDE_01916	362.098	152.625	186.394	191.058	75.6535	-2.2589	0.957716	4.21384e-12	2.21021e-10	hypothetical protein	-	-	-	GO:0055085//transmembrane transport;GO:0055085//transmembrane transport
PDE_01917	28.2457	23.5732	8.00723	7.17329	11.577	-1.28676	0.835992	1.19012e-05	0.000174027	hypothetical protein	-	-	GO:0003824//catalytic activity;GO:0030170//pyridoxal phosphate binding;GO:0030170//pyridoxal phosphate binding	GO:0009058//biosynthetic process;GO:0009058//biosynthetic process
PDE_01918	5433.87	4408.91	1499.87	2032.66	2236.92	-1.28047	0.944042	1.45094e-06	2.59797e-05	hypothetical protein	-	-	GO:0016846//carbon-sulfur lyase activity	GO:0008152//metabolic process
PDE_02146	693.849	664.44	332.468	552.725	302.394	-1.19819	0.93603	1.20208e-06	2.19305e-05	hypothetical protein	K01269|2|0.0|655|afm:AFUA_3G00650|aminopeptidase [EC:3.4.11.-] (A)	-	-	-
PDE_02288	95.7831	98.7507	93.2391	31.0381	42.2884	-1.17951	0.904848	0.000203936	0.00202905	hypothetical protein	-	-	-	-
PDE_02466	185.739	147.289	43.8325	179.804	69.099	-1.42654	0.93382	4.77223e-09	1.37074e-07	hypothetical protein	-	-	-	-
PDE_02475	28.2917	23.1421	18.4567	16.295	12.5664	-1.1708	0.823923	0.000197859	0.0019788	hypothetical protein	-	-	-	-
PDE_02535	53.8454	40.2177	42.2665	24.8133	25.4611	-1.08053	0.869954	0.00012234	0.00132366	hypothetical protein	-	-	-	-
PDE_02566	23.7562	9.79012	11.2677	5.93819	7.40014	-1.68268	0.844901	0.00243441	0.0159551	hypothetical protein	-	-	-	-
PDE_02595	56.2293	38.8165	32.8534	40.2281	19.2725	-1.54478	0.903864	1.34596e-06	2.42801e-05	hypothetical protein	K03019|1|4e-72|214|afv:AFLA_090770|DNA-directed RNA polymerase III subunit RPC10 (A)	-	GO:0003676//nucleic acid binding;GO:0008270//zinc ion binding;GO:0003677//DNA binding;GO:0003899//DNA-directed RNA polymerase activity;GO:0003676//nucleic acid binding;GO:0008270//zinc ion binding;GO:0003676//nucleic acid binding;GO:0008270//zinc ion binding;GO:0003677//DNA binding;GO:0003899//DNA-directed RNA polymerase activity	GO:0006351//transcription, DNA-templated;GO:0006351//transcription, DNA-templated;GO:0006351//transcription, DNA-templated;GO:0006351//transcription, DNA-templated;GO:0006351//transcription, DNA-templated
PDE_02837	60.0881	55.9206	32.3839	36.0635	28.9354	-1.05424	0.873476	0.000395229	0.00355485	hypothetical protein	-	-	-	-
PDE_03041	86.6696	58.3438	85.0563	58.75	38.9663	-1.1533	0.900307	0.000685699	0.00561296	hypothetical protein	K09658|1|2e-44|142|afv:AFLA_080460|dolichyl-phosphate mannosyltransferase polypeptide 2, regulatory subunit (A)	GO:0030176//integral component of endoplasmic reticulum membrane	-	GO:0009059//macromolecule biosynthetic process
PDE_03053	1324.64	587.371	392.31	414.96	660.011	-1.00503	0.922615	0.000445873	0.00394059	hypothetical protein	K03809|1|1e-120|343|nfi:NFIA_021810|Trp repressor binding protein (A)	-	GO:0010181//FMN binding;GO:0016491//oxidoreductase activity;GO:0010181//FMN binding;GO:0016491//oxidoreductase activity;GO:0010181//FMN binding	GO:0045892//negative regulation of transcription, DNA-templated
PDE_03065	493.204	322.205	432.186	263.691	214.068	-1.20411	0.933699	1.24642e-06	2.25689e-05	hypothetical protein	K01858|1|0.0|999|pcs:Pc22g25050|myo-inositol-1-phosphate synthase [EC:5.5.1.4] (A)	-	GO:0004512//inositol-3-phosphate synthase activity	GO:0006021//inositol biosynthetic process;GO:0008654//phospholipid biosynthetic process
PDE_03183	39.2514	26.4581	35.4224	14.7869	15.929	-1.30108	0.866812	0.000831718	0.00657944	hypothetical protein	-	-	-	-
PDE_03205	24.8651	17.6808	14.5521	65.2122	11.2441	-1.14496	0.806364	0.000872505	0.00683486	hypothetical protein	K15102|1|0.0|580|pcs:Pc20g14390|solute carrier family 25 (mitochondrial phosphate transporter), member 3 (A)	-	-	-
PDE_03391	49.6635	31.3985	37.6061	33.0506	23.2498	-1.09497	0.865793	0.000171647	0.00176418	hypothetical protein	-	-	GO:0005515//protein binding	-
PDE_03417	50.2848	29.796	13.6551	51.382	6.78315	-2.8901	0.926051	8.81707e-12	4.45516e-10	hypothetical protein	-	-	-	-
PDE_03475	1559.22	751.523	1166.82	1626.35	128.378	-3.60235	0.971391	1.68235e-23	2.75193e-21	hypothetical protein	-	GO:0016021//integral component of membrane;GO:0016020//membrane;GO:0016020//membrane;GO:0016020//membrane;GO:0016020//membrane;GO:0016020//membrane;GO:0016020//membrane;GO:0016020//membrane;GO:0016020//membrane;GO:0016020//membrane	GO:0022857//transmembrane transporter activity;GO:0005215//transporter activity;GO:0005215//transporter activity;GO:0005215//transporter activity;GO:0022891//substrate-specific transmembrane transporter activity;GO:0022891//substrate-specific transmembrane transporter activity;GO:0022891//substrate-specific transmembrane transporter activity;GO:0022891//substrate-specific transmembrane transporte…	GO:0055085//transmembrane transport;GO:0006810//transport;GO:0055085//transmembrane transport;GO:0006810//transport;GO:0055085//transmembrane transport;GO:0006810//transport;GO:0055085//transmembrane transport;GO:0055085//transmembrane transport;GO:0055085//transmembrane transport;GO:0055085//transmembrane transport;GO:0055085//transmembrane transport;GO:0055085//transmembrane transport;GO:005508…
PDE_03478	75.5218	75.4862	25.0143	38.6664	37.3422	-1.01609	0.880331	0.000930065	0.00723293	hypothetical protein	-	-	-	-
PDE_03500	25.6321	7.21203	2.23655	4.09701	5.75932	-2.15398	0.870679	3.78419e-17	3.61596e-15	hypothetical protein	-	GO:0016020//membrane	GO:0015171//amino acid transmembrane transporter activity	GO:0003333//amino acid transmembrane transport
PDE_03791	136.777	110.497	97.484	59.1182	63.2721	-1.11218	0.91027	0.000175074	0.00179367	hypothetical protein	-	-	GO:0003824//catalytic activity;GO:0050662//coenzyme binding	GO:0044237//cellular metabolic process
PDE_03964	211.057	147.778	124.498	117.059	0.0727376	-12.7372	0.989537	3.43304e-241	3.31322e-237	hypothetical protein	-	GO:0005634//nucleus;GO:0005634//nucleus;GO:0005634//nucleus;GO:0005634//nucleus;GO:0005634//nucleus;GO:0005634//nucleus	GO:0000981//sequence-specific DNA binding RNA polymerase II transcription factor activity;GO:0008270//zinc ion binding;GO:0000981//sequence-specific DNA binding RNA polymerase II transcription factor activity;GO:0008270//zinc ion binding;GO:0003677//DNA binding;GO:0008270//zinc ion binding;GO:0000981//sequence-specific DNA binding RNA polymerase II transcription factor activity;GO:0008270//zinc i…	GO:0006355//regulation of transcription, DNA-templated;GO:0006355//regulation of transcription, DNA-templated;GO:0006351//transcription, DNA-templated;GO:0006355//regulation of transcription, DNA-templated;GO:0006355//regulation of transcription, DNA-templated;GO:0006351//transcription, DNA-templated
PDE_03966	174.704	20.3908	123.767	38.3466	2.44242	-6.16046	0.980213	7.52026e-164	2.41927e-160	putative alpha-glucosidase	K01187|1|0.0|1458|pcs:Pc22g12350|alpha-glucosidase [EC:3.2.1.20] (A)	-	GO:0004553//hydrolase activity, hydrolyzing O-glycosyl compounds;GO:0004553//hydrolase activity, hydrolyzing O-glycosyl compounds;GO:0004553//hydrolase activity, hydrolyzing O-glycosyl compounds	GO:0005975//carbohydrate metabolic process;GO:0005975//carbohydrate metabolic process;GO:0005975//carbohydrate metabolic process
PDE_03990	1256.58	945.283	1017.08	767.561	584.031	-1.10539	0.931766	2.6337e-05	0.000346293	hypothetical protein	-	-	-	-
PDE_04101	236.197	184.331	102.431	117.034	85.2355	-1.47047	0.93843	1.76141e-09	5.53724e-08	hypothetical protein	-	-	-	-
PDE_04184	19.3281	5.18445	11.7975	37.3076	2.48887	-2.95714	0.859042	1.19159e-11	5.89743e-10	hypothetical protein	K08197|1|0.0|887|pcs:Pc13g04290|MFS transporter, SIT family, siderophore-iron:H+ symporter (A)	GO:0016021//integral component of membrane	-	GO:0055085//transmembrane transport
PDE_04185	60.3829	50.9276	50.3413	36.8476	28.3202	-1.09231	0.877827	0.000593884	0.00501889	hypothetical protein	-	-	-	-
PDE_04588	72.4567	59.4208	7.61725	131.496	20.6007	-1.81442	0.923927	0.000451653	0.00398801	hypothetical protein	K00134|1|0.0|565|afv:AFLA_101470|glyceraldehyde 3-phosphate dehydrogenase [EC:1.2.1.12] (A)	-	GO:0016620//oxidoreductase activity, acting on the aldehyde or oxo group of donors, NAD or NADP as acceptor;GO:0050661//NADP binding;GO:0051287//NAD binding;GO:0016620//oxidoreductase activity, acting on the aldehyde or oxo group of donors, NAD or NADP as acceptor;GO:0016620//oxidoreductase activity, acting on the aldehyde or oxo group of donors, NAD or NADP as acceptor;GO:0016620//oxidoreductase…	GO:0006006//glucose metabolic process;GO:0055114//oxidation-reduction process;GO:0055114//oxidation-reduction process;GO:0055114//oxidation-reduction process;GO:0055114//oxidation-reduction process;GO:0055114//oxidation-reduction process;GO:0055114//oxidation-reduction process;GO:0055114//oxidation-reduction process;GO:0055114//oxidation-reduction process;GO:0055114//oxidation-reduction process
PDE_04598	19.9791	11.1279	11.1357	5.96039	7.54071	-1.40572	0.806278	0.000247869	0.00237792	hypothetical protein	-	GO:0016021//integral component of membrane	-	-
PDE_04625	30.5004	5.33152	9.1361	4.2821	3.07007	-3.31249	0.902276	1.1878e-35	5.21068e-33	hypothetical protein	-	-	-	-
PDE_04708	36.6301	23.3774	17.0388	23.3014	18.304	-1.00087	0.827325	0.0138071	0.0644355	hypothetical protein	-	-	-	-
PDE_04732	84.7682	72.1847	21.7812	70.0708	37.0055	-1.19578	0.903398	1.25772e-05	0.000183081	hypothetical protein	K00059|1|0.0|532|pcs:Pc13g10320|3-oxoacyl-[acyl-carrier protein] reductase [EC:1.1.1.100] (A)	-	GO:0016491//oxidoreductase activity;GO:0016491//oxidoreductase activity;GO:0016491//oxidoreductase activity;GO:0016491//oxidoreductase activity;GO:0016491//oxidoreductase activity	GO:0008152//metabolic process;GO:0008152//metabolic process;GO:0008152//metabolic process;GO:0008152//metabolic process
PDE_04850	143.825	87.8985	103.917	79.1003	63.4442	-1.18075	0.916537	2.57749e-05	0.000340293	hypothetical protein	-	-	-	-
PDE_04903	99.9947	96.1851	73.3022	207.853	49.8816	-1.00334	0.889067	0.000534069	0.00459385	hypothetical protein	K09051|1|0.0|667|nfi:NFIA_065970|ATF/CREB family transcription factor (A)	GO:0005634//nucleus;GO:0005634//nucleus;GO:0005634//nucleus	GO:0003700//sequence-specific DNA binding transcription factor activity;GO:0043565//sequence-specific DNA binding;GO:0003700//sequence-specific DNA binding transcription factor activity;GO:0043565//sequence-specific DNA binding;GO:0003700//sequence-specific DNA binding transcription factor activity;GO:0003700//sequence-specific DNA binding transcription factor activity;GO:0003700//sequence-specif…	GO:0006355//regulation of transcription, DNA-templated;GO:0006355//regulation of transcription, DNA-templated;GO:0006355//regulation of transcription, DNA-templated;GO:0006355//regulation of transcription, DNA-templated;GO:0006355//regulation of transcription, DNA-templated;GO:0006355//regulation of transcription, DNA-templated
PDE_04915	68.0557	51.9933	67.8753	54.0119	21.0621	-1.69207	0.918419	0.00422058	0.0253313	putative cutinase	K08095|2|4e-86|271|afm:AFUA_2G14420|cutinase [EC:3.1.1.74] (A)	GO:0005576//extracellular region	GO:0050525//cutinase activity;GO:0016787//hydrolase activity	GO:0008152//metabolic process
PDE_04949	345.971	184.003	292.394	160.195	121.568	-1.50889	0.942747	1.87059e-11	8.93714e-10	hypothetical protein	-	-	-	-
PDE_05039	177.477	133.001	91.8125	101.372	87.5227	-1.01991	0.906575	0.000542506	0.00464984	hypothetical protein	-	-	GO:0003824//catalytic activity	GO:0008152//metabolic process
PDE_05064	31.7262	34.2958	24.7605	21.7556	14.0494	-1.17517	0.836666	5.18911e-05	0.000626774	hypothetical protein	-	-	-	-
PDE_05092	122.187	68.4616	75.6789	12.3415	12.5423	-3.28422	0.952778	3.16274e-47	2.18026e-44	hypothetical protein	-	-	-	-
PDE_05136	37.3982	24.6019	26.9779	70.7089	10.5458	-1.8263	0.890932	4.9923e-12	2.60436e-10	hypothetical protein	-	-	-	-
PDE_05177	119.088	74.0215	107.893	50.9196	50.2419	-1.24506	0.917107	4.63533e-06	7.35782e-05	hypothetical protein	K07941|1|1e-130|367|pcs:Pc18g00280|ADP-ribosylation factor 6 (A)	GO:0005622//intracellular;GO:0005622//intracellular;GO:0005622//intracellular	GO:0005525//GTP binding;GO:0005525//GTP binding;GO:0005525//GTP binding;GO:0005525//GTP binding;GO:0005525//GTP binding;GO:0005525//GTP binding;GO:0005525//GTP binding;GO:0005525//GTP binding;GO:0005525//GTP binding	GO:0007264//small GTPase mediated signal transduction;GO:0006886//intracellular protein transport;GO:0007264//small GTPase mediated signal transduction;GO:0015031//protein transport;GO:0007264//small GTPase mediated signal transduction
PDE_05278	817.884	644.464	436.955	552.538	397.848	-1.03968	0.92536	0.000167176	0.00172373	hypothetical protein	-	GO:0005739//mitochondrion	GO:0004857//enzyme inhibitor activity	GO:0045980//negative regulation of nucleotide metabolic process
PDE_05338	154.465	77.5353	76.4732	38.1877	49.4955	-1.64191	0.938465	6.24527e-09	1.75213e-07	hypothetical protein	-	-	-	-
PDE_05340	24.9813	11.6065	12.3529	5.67946	6.45868	-1.95154	0.861977	2.2016e-11	1.03144e-09	hypothetical protein	-	-	-	-
PDE_05452	51.2757	43.0059	23.5186	15.9847	21.8761	-1.22892	0.880262	0.000285341	0.00269455	hypothetical protein	-	-	-	-
PDE_05534	433.251	193.359	114.161	182.261	195.052	-1.15134	0.929245	0.000134688	0.00143414	hypothetical protein	K03305|2|0.0|704|gtr:GLOTRDRAFT_66024|proton-dependent oligopeptide transporter, POT family (A)	GO:0016020//membrane;GO:0016020//membrane	GO:0005215//transporter activity;GO:0005215//transporter activity	GO:0006810//transport;GO:0006857//oligopeptide transport
PDE_05549	36.8251	27.4216	26.1803	28.2172	14.5346	-1.3412	0.864515	1.05485e-06	1.95776e-05	hypothetical protein	-	GO:0000785//chromatin;GO:0005634//nucleus;GO:0000785//chromatin;GO:0005634//nucleus;GO:0000785//chromatin;GO:0005634//nucleus	GO:0003677//DNA binding;GO:0003677//DNA binding;GO:0003677//DNA binding;GO:0003677//DNA binding;GO:0003677//DNA binding;GO:0003677//DNA binding;GO:0003677//DNA binding;GO:0003677//DNA binding;GO:0003677//DNA binding;GO:0003677//DNA binding;GO:0003677//DNA binding;GO:0003677//DNA binding;GO:0003677//DNA binding;GO:0003677//DNA binding;GO:0003677//DNA binding	GO:0006355//regulation of transcription, DNA-templated;GO:0006355//regulation of transcription, DNA-templated;GO:0006355//regulation of transcription, DNA-templated;GO:0006355//regulation of transcription, DNA-templated
PDE_05572	208.712	150.408	78.256	63.8485	103.79	-1.00784	0.908526	0.000354755	0.00322386	hypothetical protein	-	-	-	-
PDE_05573	51.0226	38.3445	15.6882	30.7305	22.043	-1.21081	0.878552	1.08885e-05	0.000160435	hypothetical protein	K01809|1|0.0|640|pcs:Pc13g08170|mannose-6-phosphate isomerase [EC:5.3.1.8] (A)	-	GO:0004476//mannose-6-phosphate isomerase activity;GO:0008270//zinc ion binding;GO:0004476//mannose-6-phosphate isomerase activity;GO:0004476//mannose-6-phosphate isomerase activity;GO:0004476//mannose-6-phosphate isomerase activity;GO:0004476//mannose-6-phosphate isomerase activity;GO:0004476//mannose-6-phosphate isomerase activity;GO:0004476//mannose-6-phosphate isomerase activity;GO:0004476//m…	GO:0005975//carbohydrate metabolic process;GO:0009298//GDP-mannose biosynthetic process;GO:0009298//GDP-mannose biosynthetic process;GO:0009298//GDP-mannose biosynthetic process;GO:0009298//GDP-mannose biosynthetic process;GO:0009298//GDP-mannose biosynthetic process;GO:0009298//GDP-mannose biosynthetic process;GO:0005975//carbohydrate metabolic process
PDE_05576	114.991	76.6713	48.9802	29.0363	51.6111	-1.15577	0.90989	0.000808382	0.00642644	hypothetical protein	-	-	-	-
PDE_05592	60.8092	31.3543	20.7454	9.45074	25.14	-1.27431	0.893228	1.82012e-07	3.82701e-06	hypothetical protein	-	-	GO:0003676//nucleic acid binding;GO:0005524//ATP binding;GO:0008026//ATP-dependent helicase activity;GO:0003676//nucleic acid binding;GO:0004386//helicase activity;GO:0005524//ATP binding;GO:0003676//nucleic acid binding;GO:0004386//helicase activity;GO:0005524//ATP binding;GO:0003676//nucleic acid binding;GO:0004386//helicase activity;GO:0005524//ATP binding	-
PDE_05623	26.7946	20.0338	16.005	13.0314	12.787	-1.06726	0.80614	0.037741	0.134853	hypothetical protein	-	-	-	-
PDE_05653	706.244	569.115	354.765	869.735	228.911	-1.62538	0.952485	3.61889e-05	0.000457145	hypothetical protein	-	GO:0016021//integral component of membrane	-	GO:0055085//transmembrane transport
PDE_05654	17.8523	15.7212	11.6923	10.8429	5.68587	-1.65066	0.810163	0.000140611	0.0014831	hypothetical protein	-	-	GO:0008757//S-adenosylmethionine-dependent methyltransferase activity	-
PDE_05757	87.4285	74.9615	35.6395	48.8611	40.0047	-1.12793	0.899427	2.85433e-05	0.000371255	hypothetical protein	-	GO:0016021//integral component of membrane	-	GO:0055085//transmembrane transport
PDE_05793	81.1435	61.1444	58.0612	53.6203	37.9575	-1.09609	0.893246	0.000208694	0.00206999	hypothetical protein	-	-	-	-
PDE_05979	41.5115	26.0782	25.1996	12.2394	15.0687	-1.46196	0.881643	1.50639e-06	2.68728e-05	hypothetical protein	-	-	-	-
PDE_06059	45.104	16.7488	17.3099	18.8421	20.1782	-1.16046	0.865862	0.00962946	0.0484238	hypothetical protein	-	-	GO:0003824//catalytic activity	GO:0008152//metabolic process
PDE_06069	143.978	108.92	133.469	128.635	41.3052	-1.80145	0.940865	4.0083e-16	3.48506e-14	hypothetical protein	-	-	GO:0016491//oxidoreductase activity;GO:0016491//oxidoreductase activity;GO:0016491//oxidoreductase activity	GO:0008152//metabolic process;GO:0008152//metabolic process;GO:0008152//metabolic process
PDE_06187	20.2167	7.1827	8.44674	6.85902	4.77766	-2.08117	0.844314	2.69661e-14	1.94216e-12	hypothetical protein	-	-	-	-
PDE_06281	94.8416	53.8075	23.4349	14.6791	33.4959	-1.50154	0.921631	5.11825e-06	8.00968e-05	hypothetical protein	K06911|1|0.0|551|aor:AOR_1_576144|(A)	-	-	-
PDE_06325	239.687	149.585	256.692	106.771	93.4075	-1.35954	0.934684	1.97145e-08	5.0873e-07	hypothetical protein	-	-	-	-
PDE_06368	25.239	21.9303	12.4497	12.2699	8.79433	-1.52101	0.841207	4.5873e-07	9.09077e-06	hypothetical protein	-	-	-	-
PDE_06429	36.4762	22.1574	19.6499	22.5967	17.5099	-1.05878	0.836717	0.000274478	0.00260727	hypothetical protein	K10798|1|0.0|768|pcs:Pc12g02720|poly [ADP-ribose] polymerase [EC:2.4.2.30] (A)	-	-	-
PDE_06556	23.6908	17.9784	18.1975	20.0075	9.66986	-1.29276	0.816655	5.64945e-05	0.000672291	hypothetical protein	-	-	-	-
PDE_06610	436.036	297.66	108.588	354.099	178.74	-1.28658	0.937446	1.86954e-07	3.92237e-06	hypothetical protein	-	-	-	-
PDE_06685	184.385	95.1237	144.673	152.374	90.2195	-1.03121	0.909372	0.00356711	0.022068	hypothetical protein	-	-	-	-
PDE_06879	135.753	98.8367	94.0683	39.477	54.9218	-1.30553	0.923305	0.000146997	0.00153536	putative beta-1,3-galactosyltransferase	-	GO:0016020//membrane	GO:0016757//transferase activity, transferring glycosyl groups	-
PDE_07008	3595.56	1050.98	2007.16	1445.19	607.749	-2.56467	0.967126	6.60989e-19	7.33242e-17	hypothetical protein	K03146|1|0.0|619|pcs:Pc22g07960|thiamine thiazole synthase (A)	-	-	GO:0006950//response to stress;GO:0009228//thiamine biosynthetic process
PDE_07056	36.3104	21.7257	30.7359	27.8675	8.85734	-2.03544	0.895352	2.25485e-07	4.66985e-06	hypothetical protein	-	-	-	-
PDE_07066	34.5568	29.081	26.5907	33.3113	16.4149	-1.07396	0.834352	0.0224613	0.0919312	hypothetical protein	K18183|1|1e-55|171|pcs:Pc16g06310|cytochrome c oxidase assembly protein subunit 19 (A)	-	-	-
PDE_07093	32.4951	21.7083	18.2814	38.0773	13.4477	-1.27287	0.848424	5.20201e-05	0.000626774	hypothetical protein	-	-	-	-
PDE_07252	42.2633	31.9099	22.6749	22.8546	20.7459	-1.02658	0.845178	0.00175918	0.0122939	hypothetical protein	-	-	-	-
PDE_07292	16.1408	10.8598	8.79383	8.64934	4.15067	-1.9593	0.81239	4.4598e-08	1.07873e-06	hypothetical protein	-	-	-	-
PDE_07351	28.8216	16.4736	14.5401	16.1644	12.0909	-1.25323	0.834628	0.0028942	0.0185225	hypothetical protein	-	-	-	-
PDE_07533	33.8757	19.7828	4.39429	11.3914	15.9047	-1.0908	0.834041	0.000664003	0.00546317	hypothetical protein	-	-	-	-
PDE_07582	28.4874	16.481	21.5627	10.4151	9.31393	-1.61286	0.859474	0.000512565	0.00444055	hypothetical protein	-	-	-	-
PDE_07611	50.8044	27.769	42.9702	48.4807	10.5807	-2.26352	0.918747	5.42508e-06	8.43115e-05	hypothetical protein	K07243|1|0.0|519|pcs:Pc21g08030|high-affinity iron transporter (A)	GO:0016020//membrane	-	GO:0055085//transmembrane transport
PDE_07612	34.5515	23.4038	28.9113	44.2026	12.9841	-1.412	0.864567	0.00159751	0.0113867	hypothetical protein	-	-	GO:0005507//copper ion binding;GO:0005507//copper ion binding;GO:0005507//copper ion binding;GO:0016491//oxidoreductase activity;GO:0005507//copper ion binding;GO:0016491//oxidoreductase activity	GO:0055114//oxidation-reduction process;GO:0055114//oxidation-reduction process
PDE_07724	136.244	113.18	92.0087	61.3928	62.1957	-1.13131	0.912566	1.70019e-05	0.000238844	hypothetical protein	-	-	GO:0004190//aspartic-type endopeptidase activity;GO:0004190//aspartic-type endopeptidase activity;GO:0004190//aspartic-type endopeptidase activity;GO:0004190//aspartic-type endopeptidase activity;GO:0004190//aspartic-type endopeptidase activity;GO:0004190//aspartic-type endopeptidase activity;GO:0004190//aspartic-type endopeptidase activity	GO:0006508//proteolysis;GO:0006508//proteolysis;GO:0006508//proteolysis;GO:0006508//proteolysis;GO:0006508//proteolysis;GO:0006508//proteolysis;GO:0006508//proteolysis
PDE_07725	40.8397	32.6344	25.9235	15.6115	17.2126	-1.2465	0.866104	1.55329e-05	0.00022013	hypothetical protein	-	-	-	-
PDE_07863	270.749	135.987	241.249	299.091	88.406	-1.61474	0.944352	2.99193e-10	1.11058e-08	hypothetical protein	-	-	-	-
PDE_07868	23.2815	8.10726	1.60979	1.4961	8.98874	-1.373	0.821403	0.0229308	0.0934567	hypothetical protein	K00706|1|4e-06|50.8|mtm:MYCTH_140260|1,3-beta-glucan synthase [EC:2.4.1.34] (A)	-	-	-
PDE_08014	132.893	25.8117	3.80253	3.3936	18.7749	-2.82339	0.951483	0.000107994	0.00118978	hypothetical protein	-	-	-	-
PDE_08015	65.6971	13.3275	3.22424	2.29706	8.43529	-2.96132	0.935996	9.3537e-05	0.00105459	hypothetical protein	-	-	-	-
PDE_08079	73.8363	25.1291	33.652	42.3011	22.3244	-1.72571	0.922045	1.76522e-08	4.61684e-07	hypothetical protein	-	-	-	-
PDE_08080	76.8297	30.3464	46.9535	51.31	25.522	-1.58993	0.918799	7.42917e-09	2.05441e-07	hypothetical protein	-	-	-	-
PDE_08104	199.676	150.933	80.8068	54.9071	92.9274	-1.10349	0.917021	0.0012146	0.0091365	hypothetical protein	-	-	-	-
PDE_08167	33.5505	30.6693	28.1229	37.5326	15.9378	-1.07388	0.831313	0.000441685	0.00390715	hypothetical protein	K15272|1|0.0|644|pcs:Pc22g02140|solute carrier family 35 (UDP-sugar transporter), member A1/2/3 (A)	GO:0000139//Golgi membrane;GO:0016021//integral component of membrane;GO:0016021//integral component of membrane	GO:0005351//sugar:proton symporter activity;GO:0005338//nucleotide-sugar transmembrane transporter activity	GO:0008643//carbohydrate transport;GO:0015780//nucleotide-sugar transport
PDE_08394	45.6578	35.0377	28.5632	25.0614	20.3316	-1.16714	0.867105	0.000128329	0.00138072	hypothetical protein	-	GO:0005783//endoplasmic reticulum;GO:0016021//integral component of membrane	GO:0047750//cholestenol delta-isomerase activity	GO:0016125//sterol metabolic process
PDE_08435	38.5838	29.8536	34.548	18.7524	19.0385	-1.01908	0.834853	0.000791376	0.00631726	hypothetical protein	-	-	-	-
PDE_08489	102.17	78.7638	69.7084	31.381	35.461	-1.52667	0.925325	1.21154e-08	3.23895e-07	hypothetical protein	-	-	-	-
PDE_08490	218.618	152.347	177.041	85.5735	67.2125	-1.70161	0.944525	4.21261e-15	3.15162e-13	hypothetical protein	-	-	GO:0005515//protein binding;GO:0005543//phospholipid binding;GO:0005515//protein binding;GO:0005543//phospholipid binding	-
PDE_08500	52.2414	28.4227	35.2739	38.5382	25.0156	-1.06236	0.865465	0.00049648	0.00433623	hypothetical protein	-	-	-	-
PDE_08578	24.8553	18.8019	24.4076	12.5208	9.97948	-1.31652	0.824079	3.45512e-05	0.000439913	hypothetical protein	-	-	-	-
PDE_08631	229.91	167.611	128.16	225.085	100.629	-1.19203	0.925705	4.33363e-06	6.97065e-05	hypothetical protein	-	-	-	-
PDE_08706	334.831	267.337	148.922	313.356	163.247	-1.03637	0.918816	0.00255546	0.0166528	hypothetical protein	-	-	-	-
PDE_08864	22.2163	18.359	9.42693	10.8778	5.91479	-1.90922	0.847906	2.15814e-06	3.69294e-05	hypothetical protein	-	-	-	-
PDE_08879	397.466	253.398	223.721	722.557	150.134	-1.40458	0.941279	0.00204065	0.0138888	hypothetical protein	K15104|1|0.0|537|pcs:Pc12g09330|solute carrier family 25 (mitochondrial oxoglutarate transporter), member 11 (A)	-	-	GO:0055085//transmembrane transport;GO:0055085//transmembrane transport;GO:0055085//transmembrane transport;GO:0055085//transmembrane transport
PDE_08951	86.9231	53.1872	75.5305	71.8954	30.8242	-1.49567	0.918575	2.50688e-05	0.000333249	hypothetical protein	-	-	-	-
PDE_08981	29.4247	23.8249	10.7305	17.2327	10.9457	-1.42667	0.850996	2.08875e-05	0.000285128	hypothetical protein	K13953|3|3e-65|211|ani:AN2061.2|alcohol dehydrogenase, propanol-preferring [EC:1.1.1.1] (A)	-	-	-
PDE_08982	127.28	33.4637	30.5912	199.336	19.3917	-2.71449	0.949826	1.63711e-18	1.75553e-16	hypothetical protein	-	-	-	-
PDE_08990	42.0571	24.7934	33.2761	41.4003	14.1865	-1.56783	0.888083	9.54679e-08	2.14769e-06	putative chitin glucanosyltransferase	-	-	GO:0004553//hydrolase activity, hydrolyzing O-glycosyl compounds	GO:0005975//carbohydrate metabolic process
PDE_09014	54.0262	33.999	43.5214	22.8379	14.1971	-1.92807	0.915225	8.61708e-15	6.30026e-13	putative endo-beta-1,4-glucanase	-	-	GO:0008810//cellulase activity	GO:0000272//polysaccharide catabolic process
PDE_09016	64.6665	46.3744	50.3589	35.1264	21.2416	-1.60613	0.91336	3.12512e-12	1.65717e-10	putative cellulose synthase	-	-	-	-
PDE_09101	275.514	201.114	138.097	94.3916	111.661	-1.303	0.933302	7.35928e-08	1.68704e-06	hypothetical protein	-	-	-	-
PDE_09249	27.6485	11.7909	9.53665	5.82008	7.58732	-1.86554	0.868003	2.49015e-13	1.57126e-11	putative alpha-mannosidase	K01230|1|0.0|805|ani:AN0551.2|mannosyl-oligosaccharide alpha-1,2-mannosidase [EC:3.2.1.113] (A)	GO:0016020//membrane;GO:0016020//membrane;GO:0016020//membrane;GO:0016020//membrane;GO:0016020//membrane;GO:0016020//membrane;GO:0016020//membrane;GO:0016020//membrane	GO:0004571//mannosyl-oligosaccharide 1,2-alpha-mannosidase activity;GO:0005509//calcium ion binding;GO:0004571//mannosyl-oligosaccharide 1,2-alpha-mannosidase activity;GO:0005509//calcium ion binding;GO:0004571//mannosyl-oligosaccharide 1,2-alpha-mannosidase activity;GO:0005509//calcium ion binding;GO:0004571//mannosyl-oligosaccharide 1,2-alpha-mannosidase activity;GO:0005509//calcium ion binding…	-
PDE_09261	96.6402	57.7821	45.5813	72.2107	43.4107	-1.15457	0.903571	1.66218e-05	0.000234528	hypothetical protein	K08178|1|0.0|843|pcs:Pc12g06700|MFS transporter, SHS family, lactate transporter (A)	GO:0016021//integral component of membrane	GO:0022857//transmembrane transporter activity	GO:0055085//transmembrane transport
PDE_09284	25.0809	18.0812	25.0085	8.42747	9.78365	-1.35815	0.828913	1.78559e-05	0.000247597	hypothetical protein	-	-	-	-
PDE_09312	133.083	106.416	88.0307	210.29	53.4046	-1.31729	0.923012	8.01087e-08	1.82773e-06	hypothetical protein	K09510|1|8e-164|467|ani:AN2238.2|DnaJ homolog subfamily B member 4 (A)	-	-	-
PDE_09377	3689.87	1484.76	1465.23	1068.74	321.738	-3.51961	0.971753	1.31767e-73	2.11947e-70	hypothetical protein	-	GO:0016020//membrane;GO:0016020//membrane;GO:0016020//membrane;GO:0016020//membrane;GO:0016020//membrane;GO:0016020//membrane;GO:0016020//membrane;GO:0016020//membrane;GO:0016021//integral component of membrane	GO:0022891//substrate-specific transmembrane transporter activity;GO:0005215//transporter activity;GO:0005215//transporter activity;GO:0022891//substrate-specific transmembrane transporter activity;GO:0022891//substrate-specific transmembrane transporter activity;GO:0022891//substrate-specific transmembrane transporter activity;GO:0022891//substrate-specific transmembrane transporter activity;GO:…	GO:0055085//transmembrane transport;GO:0006810//transport;GO:0055085//transmembrane transport;GO:0006810//transport;GO:0055085//transmembrane transport;GO:0055085//transmembrane transport;GO:0055085//transmembrane transport;GO:0055085//transmembrane transport;GO:0055085//transmembrane transport;GO:0055085//transmembrane transport;GO:0055085//transmembrane transport
PDE_09430	95.6994	52.1615	34.3677	25.5489	45.8806	-1.06062	0.895577	0.000332768	0.0030557	hypothetical protein	-	-	-	-
PDE_09442	44.4364	25.1208	23.5347	8.63937	15.8714	-1.48531	0.886978	2.84135e-06	4.73607e-05	hypothetical protein	-	-	-	-
PDE_09532	68.3756	25.5114	20.829	13.8277	24.5264	-1.47915	0.909959	1.99633e-10	7.66368e-09	putative chitinase	K01183|1|4e-133|425|pcs:Pc22g13690|chitinase [EC:3.2.1.14] (A)	-	GO:0004553//hydrolase activity, hydrolyzing O-glycosyl compounds;GO:0004553//hydrolase activity, hydrolyzing O-glycosyl compounds	GO:0005975//carbohydrate metabolic process;GO:0005975//carbohydrate metabolic process
PDE_09561	33.3022	27.549	33.4268	21.075	15.8239	-1.07351	0.830623	0.000213002	0.00210193	hypothetical protein	K01852|1|0.0|1351|nfi:NFIA_038030|lanosterol synthase [EC:5.4.99.7] (A)	-	-	-
PDE_09571	40.4734	31.3239	28.7556	33.2992	15.3728	-1.39659	0.876705	2.83801e-05	0.00036963	hypothetical protein	K03685|1|1e-15|73.9|afv:AFLA_056830|ribonuclease III [EC:3.1.26.3] (A)	-	-	-
PDE_09599	66.9667	49.2869	32.2027	31.2085	30.4495	-1.13703	0.888325	2.90825e-05	0.000375736	hypothetical protein	-	-	-	-
PDE_09785	70.568	57.2913	29.6357	28.6192	33.9888	-1.05395	0.882455	0.000639713	0.00531772	hypothetical protein	-	-	-	-
PDE_09831	214.058	159.739	135.939	73.9981	102.03	-1.06901	0.916641	8.51366e-05	0.000964382	hypothetical protein	-	-	-	-
PDE_09900	6922.5	3712.17	4547.06	3674.37	2342.98	-1.56295	0.954073	9.78565e-13	5.65517e-11	hypothetical protein	K18278|1|0.0|644|pcs:Pc21g15700|pyrimidine precursor biosynthesis enzyme (A)	-	-	-
PDE_09928	31.5735	19.3115	24.0461	15.7669	15.1495	-1.05944	0.82199	0.00810388	0.0425751	hypothetical protein	-	-	-	-
PDE_09994	221.448	149.866	162.686	132.544	107.908	-1.03717	0.914172	0.000159738	0.00165411	hypothetical protein	K08141|1|0.0|981|afm:AFUA_4G00150|MFS transporter, SP family, general alpha glucoside:H+ symporter (A)	-	-	-

## Sheet: Group_5 11 genes
GeneID	Means (Wild-type on Cellulose)	Means (ΔclrB on Cellulose)	Means (ΔcreA on Cellulose)	Means (ΔcreA-ΔclrB on Cellulose)	Means (ΔamyR on Cellulose)	log2Ratio(ΔamyR/Wild-type)	Probability (ΔamyR/Wild-type)	P-value (ΔamyR/Wild-type)	FDR (ΔamyR/Wild-type)	Description	KEGG Orthology	GO Component	GO Function	GO Process
PDE_00599	49.1578	9.14401	19.1033	13.3602	15.9798	-1.62117	0.900601	1.01645e-10	4.17435e-09	hypothetical protein	-	GO:0016020//membrane	GO:0004888//transmembrane signaling receptor activity	GO:0007166//cell surface receptor signaling pathway
PDE_02145	638.881	210.013	169.995	143.652	185.312	-1.78559	0.955109	1.43313e-12	7.99489e-11	hypothetical protein	-	-	-	-
PDE_02469	49.2611	20.3293	25.514	27.8281	21.4319	-1.20069	0.875462	0.000118276	0.00128545	hypothetical protein	-	-	-	-
PDE_05463	18.4879	9.43967	11.2297	3.66863	5.73745	-1.6881	0.816257	1.69193e-05	0.000238376	hypothetical protein	-	-	-	-
PDE_06329	27.6199	7.60159	17.9018	2.41824	12.4442	-1.15023	0.819365	0.00054634	0.00467855	hypothetical protein	-	-	-	-
PDE_07097	24.5674	14.8579	19.0894	16.0974	11.1905	-1.13447	0.804068	0.00680928	0.0369608	hypothetical protein	-	-	-	-
PDE_07138	30.7992	10.7475	8.61139	12.0075	12.8764	-1.25817	0.842346	0.000243139	0.00234185	hypothetical protein	-	-	-	-
PDE_07289	33.9264	21.0448	25.8813	15.7881	14.7712	-1.19962	0.846352	0.00116067	0.00877144	hypothetical protein	-	-	-	-
PDE_08075	677.892	423.923	514.516	777.9	303.98	-1.15708	0.932853	0.00564269	0.0319025	hypothetical protein	-	-	-	-
PDE_08796	38.9306	26.4026	12.7003	33.3678	15.9189	-1.29017	0.865707	3.60141e-05	0.000455533	hypothetical protein	-	-	GO:0030246//carbohydrate binding;GO:0030246//carbohydrate binding	GO:0005975//carbohydrate metabolic process;GO:0005975//carbohydrate metabolic process
PDE_08912	145.971	41.7141	79.0933	68.3936	29.6093	-2.30156	0.948669	1.87812e-07	3.93184e-06	hypothetical protein	-	-	-	-

## Sheet: Group _6 10 genes
GeneID	Means (Wild-type on Cellulose)	Means (ΔclrB on Cellulose)	Means (ΔcreA on Cellulose)	Means (ΔcreA-ΔclrB on Cellulose)	Means (ΔamyR on Cellulose)	log2Ratio(ΔamyR/Wild-type)	Probability (ΔamyR/Wild-type)	P-value (ΔamyR/Wild-type)	FDR (ΔamyR/Wild-type)	Description	KEGG Orthology	GO Component	GO Function	GO Process
PDE_00965	30.291	33.8943	3.94596	8.03075	15.0209	-1.01192	0.809507	0.0298006	0.114084	putative N-acetyl-glucosamine-6-phosphate deacetylase	K01443|1|0.0|729|pcs:Pc22g10010|N-acetylglucosamine-6-phosphate deacetylase [EC:3.5.1.25] (A)	-	GO:0008448//N-acetylglucosamine-6-phosphate deacetylase activity	GO:0006044//N-acetylglucosamine metabolic process
PDE_01018	129.917	124.08	103.806	126.095	59.8719	-1.11764	0.910719	0.000692119	0.00566072	hypothetical protein	K03783|1|5e-174|487|pcs:Pc12g04650|purine-nucleoside phosphorylase [EC:2.4.2.1] (A)	-	GO:0004731//purine-nucleoside phosphorylase activity;GO:0004731//purine-nucleoside phosphorylase activity;GO:0016763//transferase activity, transferring pentosyl groups;GO:0003824//catalytic activity	GO:0006139//nucleobase-containing compound metabolic process;GO:0006139//nucleobase-containing compound metabolic process;GO:0009116//nucleoside metabolic process
PDE_02975	213.449	223.456	204.687	471.619	78.9994	-1.43398	0.935823	8.17988e-07	1.55402e-05	hypothetical protein	K09503|1|0.0|698|afv:AFLA_030180|DnaJ homolog subfamily A member 2 (A)	-	GO:0005524//ATP binding;GO:0051082//unfolded protein binding;GO:0031072//heat shock protein binding;GO:0051082//unfolded protein binding;GO:0031072//heat shock protein binding;GO:0051082//unfolded protein binding	GO:0006457//protein folding;GO:0009408//response to heat
PDE_03482	267.091	265.847	181.956	300.584	132.991	-1.00601	0.911979	0.000945451	0.00733484	hypothetical protein	-	-	-	-
PDE_04321	36.2331	38.711	10.6803	29.1159	13.1789	-1.45908	0.871284	0.0569808	0.181672	hypothetical protein	-	-	-	-
PDE_07006	39.4399	55.1594	21.3784	34.1466	19.4252	-1.02173	0.83708	0.00108393	0.0082435	hypothetical protein	-	GO:0016021//integral component of membrane	-	GO:0055085//transmembrane transport
PDE_07263	150.429	185.714	92.9394	162.697	69.472	-1.11458	0.91279	3.86684e-05	0.000484032	hypothetical protein	-	-	-	-
PDE_08547	109.69	109.954	80.4528	156.501	35.6348	-1.62207	0.930989	5.19743e-05	0.000626774	hypothetical protein	K03009|1|2e-34|115|act:ACLA_051000|DNA-directed RNA polymerases I, II, and III subunit RPABC4 (A)	-	GO:0003677//DNA binding;GO:0003899//DNA-directed RNA polymerase activity;GO:0003677//DNA binding;GO:0003899//DNA-directed RNA polymerase activity	GO:0006351//transcription, DNA-templated;GO:0006351//transcription, DNA-templated
PDE_09402	83.2877	108.522	84.2396	143.573	32.3651	-1.36367	0.912031	1.05216e-07	2.34513e-06	hypothetical protein	-	-	GO:0005506//iron ion binding;GO:0016491//oxidoreductase activity	GO:0006633//fatty acid biosynthetic process;GO:0055114//oxidation-reduction process
PDE_09986	133.359	195.032	78.2024	44.4979	63.4527	-1.07156	0.907663	0.00017302	0.0017764	hypothetical protein	-	-	-	-

## Sheet: Group_7 67 genes
GeneID	Means (Wild-type on Cellulose)	Means (ΔclrB on Cellulose)	Means (ΔcreA on Cellulose)	Means (ΔcreA-ΔclrB on Cellulose)	Means (ΔamyR on Cellulose)	log2Ratio(ΔamyR/Wild-type)	Probability (ΔamyR/Wild-type)	P-value (ΔamyR/Wild-type)	FDR (ΔamyR/Wild-type)	Description	KEGG Orthology	GO Component	GO Function	GO Process
PDE_00223	109.806	143.089	98.5104	78.2871	25.929	-2.08232	0.941141	0.0633393	0.195988	hypothetical protein	K13830|1|0.0|2877|pcs:Pc16g12160|pentafunctional AROM polypeptide [EC:4.2.3.4 4.2.1.10 1.1.1.25 2.7.1.71 2.5.1.19] (A)	GO:0005737//cytoplasm;GO:0005737//cytoplasm;GO:0005737//cytoplasm	GO:0003856//3-dehydroquinate synthase activity;GO:0003866//3-phosphoshikimate 1-carboxyvinyltransferase activity;GO:0003855//3-dehydroquinate dehydratase activity;GO:0003855//3-dehydroquinate dehydratase activity;GO:0003856//3-dehydroquinate synthase activity;GO:0003866//3-phosphoshikimate 1-carboxyvinyltransferase activity;GO:0004764//shikimate 3-dehydrogenase (NADP+) activity;GO:0004765//shikim…	GO:0009073//aromatic amino acid family biosynthetic process;GO:0009073//aromatic amino acid family biosynthetic process;GO:0055114//oxidation-reduction process;GO:0009073//aromatic amino acid family biosynthetic process;GO:0055114//oxidation-reduction process;GO:0055114//oxidation-reduction process
PDE_00454	33.0181	48.4206	15.434	8.89051	7.73815	-2.0932	0.89019	0.093529	0.25849	hypothetical protein	-	-	GO:0046872//metal ion binding;GO:0046872//metal ion binding;GO:0003700//sequence-specific DNA binding transcription factor activity;GO:0043565//sequence-specific DNA binding;GO:0046872//metal ion binding;GO:0003677//DNA binding;GO:0003700//sequence-specific DNA binding transcription factor activity;GO:0043565//sequence-specific DNA binding	GO:0006355//regulation of transcription, DNA-templated;GO:0006355//regulation of transcription, DNA-templated;GO:0006355//regulation of transcription, DNA-templated
PDE_00455	511.343	734.083	192.408	120.93	82.7776	-2.62698	0.963017	0.137907	0.335673	hypothetical protein	K01866|1|0.0|600|ani:AN0057.2|tyrosyl-tRNA synthetase [EC:6.1.1.1] (A)	GO:0005737//cytoplasm;GO:0005737//cytoplasm;GO:0005737//cytoplasm;GO:0005737//cytoplasm;GO:0005737//cytoplasm	GO:0000166//nucleotide binding;GO:0004831//tyrosine-tRNA ligase activity;GO:0005524//ATP binding;GO:0000166//nucleotide binding;GO:0004812//aminoacyl-tRNA ligase activity;GO:0005524//ATP binding;GO:0000166//nucleotide binding;GO:0004831//tyrosine-tRNA ligase activity;GO:0005524//ATP binding;GO:0000166//nucleotide binding;GO:0004831//tyrosine-tRNA ligase activity;GO:0005524//ATP binding;GO:0000166…	GO:0006437//tyrosyl-tRNA aminoacylation;GO:0006418//tRNA aminoacylation for protein translation;GO:0006437//tyrosyl-tRNA aminoacylation;GO:0006437//tyrosyl-tRNA aminoacylation;GO:0006437//tyrosyl-tRNA aminoacylation;GO:0006437//tyrosyl-tRNA aminoacylation
PDE_00537	269.253	426.08	32.1098	119.391	108.292	-1.31403	0.93344	0.00186616	0.0128553	hypothetical protein	K00257|1|0.0|800|pcs:Pc16g13490|[EC:1.3.99.-] (A)	-	GO:0003995//acyl-CoA dehydrogenase activity;GO:0003995//acyl-CoA dehydrogenase activity;GO:0016627//oxidoreductase activity, acting on the CH-CH group of donors;GO:0003995//acyl-CoA dehydrogenase activity;GO:0003995//acyl-CoA dehydrogenase activity	GO:0055114//oxidation-reduction process;GO:0055114//oxidation-reduction process;GO:0055114//oxidation-reduction process;GO:0055114//oxidation-reduction process;GO:0055114//oxidation-reduction process
PDE_00710	144.774	242.914	59.3998	860.834	61.1848	-1.24256	0.920923	0.0178623	0.0778983	hypothetical protein	-	-	-	-
PDE_00873	328.557	513.749	228.856	262.279	127.627	-1.36421	0.937895	0.334739	0.59095	hypothetical protein	K01626|1|0.0|676|pcs:Pc21g04710|3-deoxy-7-phosphoheptulonate synthase [EC:2.5.1.54] (A)	-	GO:0003849//3-deoxy-7-phosphoheptulonate synthase activity	GO:0009073//aromatic amino acid family biosynthetic process;GO:0009058//biosynthetic process
PDE_00913	49.5184	40.7303	21.2822	24.3893	18.6362	-1.40985	0.890138	0.0329185	0.123041	hypothetical protein	-	GO:0016021//integral component of membrane	-	GO:0055085//transmembrane transport
PDE_01187	958.517	1670.1	331.308	113.115	111.207	-3.10756	0.968058	0.146362	0.348567	hypothetical protein	-	GO:0016021//integral component of membrane	-	GO:0055085//transmembrane transport
PDE_01188	608.633	1167.52	162.955	78.6293	27.5924	-4.46323	0.973618	0.0937408	0.258954	hypothetical protein	-	-	GO:0016491//oxidoreductase activity	GO:0055114//oxidation-reduction process
PDE_01189	362.38	747.281	101.535	47.9858	13.0131	-4.79947	0.973756	0.0660833	0.202467	hypothetical protein	K01101|1|0.0|580|nfi:NFIA_043770|4-nitrophenyl phosphatase [EC:3.1.3.41] (A)	-	GO:0016791//phosphatase activity	GO:0008152//metabolic process
PDE_01191	672.631	1348.6	373.933	103.387	85.2008	-2.98088	0.966349	0.181684	0.401242	hypothetical protein	-	-	-	-
PDE_01192	132.141	230.756	60.4196	86.8665	39.3389	-1.74805	0.938258	0.306926	0.558368	hypothetical protein	-	-	-	-
PDE_01193	236.413	589.457	54.9493	14.7161	6.74047	-5.13231	0.972996	0.0884107	0.248183	hypothetical protein	-	-	-	-
PDE_01194	3263.29	7164.04	704.307	227.852	131.26	-4.63583	0.97828	0.117166	0.301458	hypothetical protein	K00799|1|2e-162|451|nfi:NFIA_043710|glutathione S-transferase [EC:2.5.1.18] (A)	-	GO:0005515//protein binding;GO:0005515//protein binding	-
PDE_01195	1348.55	2836.44	270.572	135.657	44.2048	-4.93106	0.979885	0.0946884	0.260674	hypothetical protein	-	-	-	-
PDE_01265	275.408	704.563	116.654	165.627	132.916	-1.05105	0.917521	0.377854	0.630585	hypothetical protein	-	GO:0016021//integral component of membrane	GO:0015299//solute:proton antiporter activity	GO:0006812//cation transport;GO:0055085//transmembrane transport
PDE_01370	17.8211	50.1228	19.7732	5.45964	4.48428	-1.99064	0.826289	0.237465	0.476262	hypothetical protein	K06001|1|0.0|635|aor:AOR_1_1380024|tryptophan synthase beta chain [EC:4.2.1.20] (A)	-	GO:0004834//tryptophan synthase activity;GO:0004834//tryptophan synthase activity	GO:0000162//tryptophan biosynthetic process;GO:0006568//tryptophan metabolic process
PDE_01384	65.1332	84.8311	7.17101	169.767	7.6134	-3.09678	0.936755	1.05287e-45	6.77415e-43	hypothetical protein	K00281|1|0.0|1888|pcs:Pc14g00390|glycine dehydrogenase [EC:1.4.4.2] (A)	-	GO:0004375//glycine dehydrogenase (decarboxylating) activity;GO:0004375//glycine dehydrogenase (decarboxylating) activity;GO:0004375//glycine dehydrogenase (decarboxylating) activity;GO:0004375//glycine dehydrogenase (decarboxylating) activity	GO:0006546//glycine catabolic process;GO:0055114//oxidation-reduction process;GO:0006546//glycine catabolic process;GO:0055114//oxidation-reduction process;GO:0006544//glycine metabolic process;GO:0055114//oxidation-reduction process;GO:0006544//glycine metabolic process;GO:0055114//oxidation-reduction process
PDE_01793	194.743	238.525	67.7473	39.9632	51.9947	-1.90514	0.947357	0.121862	0.30897	hypothetical protein	-	GO:0016021//integral component of membrane	-	GO:0055085//transmembrane transport
PDE_02215	313.281	1098.87	194.776	110.57	126.204	-1.3117	0.935012	0.372311	0.625117	hypothetical protein	K14333|1|0.0|648|pcs:Pc20g01500|2,3-dihydroxybenzoate decarboxylase [EC:4.1.1.46] (A)	-	-	-
PDE_02578	133.723	127.967	109.661	79.0092	57.9151	-1.20724	0.917677	0.133047	0.327194	hypothetical protein	K01736|1|0.0|725|aor:AOR_1_144154|chorismate synthase [EC:4.2.3.5] (A)	-	-	-
PDE_02593	36.7942	73.1994	12.4784	22.83	18.0014	-1.03137	0.833299	0.00415679	0.0250263	hypothetical protein	K17989|1|1e-168|479|nfi:NFIA_018580|L-serine/L-threonine ammonia-lyase [EC:4.3.1.17 4.3.1.19] (A)	-	GO:0030170//pyridoxal phosphate binding	GO:0006520//cellular amino acid metabolic process
PDE_02816	125.614	129.24	47.3856	67.8826	45.2689	-1.4724	0.928502	0.0345571	0.126644	hypothetical protein	-	GO:0016021//integral component of membrane	-	GO:0055085//transmembrane transport
PDE_03365	470.958	950.142	5.17067	7.78979	34.9612	-3.75177	0.96811	0.00365866	0.022519	hypothetical protein	K00517|2|0.0|873|afm:AFUA_6G02210|[EC:1.14.-.-] (A)	-	GO:0005506//iron ion binding;GO:0009055//electron carrier activity;GO:0016705//oxidoreductase activity, acting on paired donors, with incorporation or reduction of molecular oxygen;GO:0020037//heme binding;GO:0016705//oxidoreductase activity, acting on paired donors, with incorporation or reduction of molecular oxygen;GO:0005506//iron ion binding;GO:0016705//oxidoreductase activity, acting on pai…	GO:0055114//oxidation-reduction process;GO:0055114//oxidation-reduction process;GO:0055114//oxidation-reduction process;GO:0055114//oxidation-reduction process;GO:0055114//oxidation-reduction process;GO:0055114//oxidation-reduction process;GO:0055114//oxidation-reduction process;GO:0055114//oxidation-reduction process;GO:0055114//oxidation-reduction process;GO:0055114//oxidation-reduction process…
PDE_03392	88.0403	112.23	63.2393	36.1067	15.6372	-2.49318	0.940416	0.0259182	0.102768	hypothetical protein	K14454|1|0.0|785|pcs:Pc22g23830|aspartate aminotransferase, cytoplasmic [EC:2.6.1.1] (A)	-	GO:0030170//pyridoxal phosphate binding;GO:0003824//catalytic activity;GO:0030170//pyridoxal phosphate binding;GO:0008483//transaminase activity;GO:0008483//transaminase activity;GO:0008483//transaminase activity;GO:0008483//transaminase activity	GO:0009058//biosynthetic process;GO:0009058//biosynthetic process;GO:0006520//cellular amino acid metabolic process;GO:0006520//cellular amino acid metabolic process;GO:0006520//cellular amino acid metabolic process;GO:0006520//cellular amino acid metabolic process
PDE_03483	493.191	784.818	176.466	794.464	154.303	-1.67638	0.951518	6.26793e-07	1.21469e-05	hypothetical protein	K01638|1|0.0|1045|pcs:Pc20g13550|malate synthase [EC:2.3.3.9] (A)	-	GO:0004474//malate synthase activity;GO:0004474//malate synthase activity;GO:0004474//malate synthase activity	GO:0006097//glyoxylate cycle;GO:0006097//glyoxylate cycle;GO:0006097//glyoxylate cycle
PDE_03487	227.188	338.601	51.721	117.344	87.3386	-1.37919	0.934701	5.51859e-09	1.56188e-07	hypothetical protein	K01647|1|0.0|873|pcs:Pc20g13510|citrate synthase [EC:2.3.3.1] (A)	-	GO:0046912//transferase activity, transferring acyl groups, acyl groups converted into alkyl on transfer;GO:0046912//transferase activity, transferring acyl groups, acyl groups converted into alkyl on transfer;GO:0046912//transferase activity, transferring acyl groups, acyl groups converted into alkyl on transfer;GO:0046912//transferase activity, transferring acyl groups, acyl groups converted in…	GO:0044262//cellular carbohydrate metabolic process;GO:0006099//tricarboxylic acid cycle;GO:0044262//cellular carbohydrate metabolic process;GO:0044262//cellular carbohydrate metabolic process;GO:0044262//cellular carbohydrate metabolic process;GO:0044262//cellular carbohydrate metabolic process;GO:0044262//cellular carbohydrate metabolic process;GO:0044262//cellular carbohydrate metabolic process
PDE_03501	283.994	325.732	82.1704	127.748	103.863	-1.45118	0.939363	2.32835e-10	8.84682e-09	hypothetical protein	K01720|1|0.0|1034|pcs:Pc20g13350|2-methylcitrate dehydratase [EC:4.2.1.79] (A)	-	GO:0047547//2-methylcitrate dehydratase activity;GO:0047547//2-methylcitrate dehydratase activity;GO:0051537//2 iron, 2 sulfur cluster binding	GO:0019543//propionate catabolic process;GO:0019629//propionate catabolic process, 2-methylcitrate cycle
PDE_03776	93.4891	184.324	59.0367	77.3819	44.1887	-1.08112	0.897372	0.0548346	0.177309	hypothetical protein	-	-	GO:0005509//calcium ion binding	-
PDE_03805	17.5124	21.6953	7.9492	6.1635	3.62758	-2.2713	0.833489	2.02121e-05	0.000276691	hypothetical protein	K00826|1|0.0|709|pcs:Pc22g20630|branched-chain amino acid aminotransferase [EC:2.6.1.42] (A)	-	GO:0003824//catalytic activity;GO:0003824//catalytic activity	GO:0008152//metabolic process;GO:0008152//metabolic process
PDE_03907	142.967	165.507	41.5322	107.576	42.1719	-1.76133	0.939639	3.52378e-14	2.48234e-12	hypothetical protein	K07511|1|0.0|546|afv:AFLA_043610|enoyl-CoA hydratase [EC:4.2.1.17] (A)	-	GO:0003824//catalytic activity;GO:0003824//catalytic activity	GO:0008152//metabolic process;GO:0008152//metabolic process
PDE_04031	50.9526	74.5535	13.3546	25.3067	11.5763	-2.13798	0.916986	2.11242e-06	3.63405e-05	hypothetical protein	K01697|1|0.0|805|nfi:NFIA_083350|cystathionine beta-synthase [EC:4.2.1.22] (A)	GO:0005737//cytoplasm	GO:0030554//adenyl nucleotide binding;GO:0030554//adenyl nucleotide binding;GO:0004122//cystathionine beta-synthase activity;GO:0030554//adenyl nucleotide binding	GO:0006535//cysteine biosynthetic process from serine;GO:0019343//cysteine biosynthetic process via cystathionine
PDE_04048	149.031	153.275	75.3062	50.478	73.5242	-1.01932	0.903087	0.00036681	0.00332715	hypothetical protein	K14213|1|0.0|727|pcs:Pc13g05440|Xaa-Pro dipeptidase [EC:3.4.13.9] (A)	-	GO:0004177//aminopeptidase activity;GO:0030145//manganese ion binding;GO:0004177//aminopeptidase activity;GO:0030145//manganese ion binding	GO:0009987//cellular process
PDE_04090	216.592	203.584	55.7354	306.098	78.3541	-1.4669	0.93755	2.62593e-10	9.86102e-09	hypothetical protein	K00600|1|0.0|944|pcs:Pc13g05010|glycine hydroxymethyltransferase [EC:2.1.2.1] (A)	-	GO:0004372//glycine hydroxymethyltransferase activity;GO:0004372//glycine hydroxymethyltransferase activity;GO:0030170//pyridoxal phosphate binding;GO:0004372//glycine hydroxymethyltransferase activity	GO:0006544//glycine metabolic process;GO:0006563//L-serine metabolic process;GO:0006544//glycine metabolic process;GO:0006563//L-serine metabolic process;GO:0006544//glycine metabolic process;GO:0006563//L-serine metabolic process
PDE_04127	77.8675	85.2721	51.5125	146.936	33.178	-1.23079	0.90212	0.00140925	0.0102957	hypothetical protein	-	GO:0016021//integral component of membrane	-	-
PDE_04216	71.0485	89.7054	32.8152	52.7469	35.2505	-1.01116	0.876791	0.00189064	0.0129962	hypothetical protein	-	-	GO:0051920//peroxiredoxin activity	GO:0055114//oxidation-reduction process
PDE_04700	64.7009	63.2634	26.4237	57.2094	30.3025	-1.09435	0.882092	8.52645e-05	0.000964699	hypothetical protein	K00311|1|0.0|1090|ani:AN4977.2|electron-transferring-flavoprotein dehydrogenase [EC:1.5.5.1] (A)	-	GO:0051536//iron-sulfur cluster binding;GO:0004174//electron-transferring-flavoprotein dehydrogenase activity	GO:0055114//oxidation-reduction process
PDE_05118	1765.08	3427.01	765.428	1741.17	805.866	-1.13112	0.934891	0.0414639	0.143945	hypothetical protein	-	GO:0016020//membrane;GO:0016020//membrane;GO:0016020//membrane;GO:0016020//membrane;GO:0016020//membrane;GO:0016020//membrane;GO:0016020//membrane	-	-
PDE_05238	45.1159	42.9765	28.6213	31.0303	20.5028	-1.13781	0.864256	0.000193105	0.00193727	hypothetical protein	K10669|3|2e-139|402|nfi:NFIA_035260|2'-phosphotransferase [EC:2.7.1.160] (A)	-	GO:0016772//transferase activity, transferring phosphorus-containing groups	GO:0006388//tRNA splicing, via endonucleolytic cleavage and ligation
PDE_05239	109.984	316.646	94.9662	33.2146	45.0965	-1.28621	0.917314	0.288216	0.537397	hypothetical protein	K03381|1|0.0|506|afm:AFUA_2G02910|catechol 1,2-dioxygenase [EC:1.13.11.1] (A)	-	GO:0003824//catalytic activity;GO:0008199//ferric iron binding;GO:0005506//iron ion binding;GO:0018576//catechol 1,2-dioxygenase activity	GO:0006725//cellular aromatic compound metabolic process;GO:0055114//oxidation-reduction process;GO:0009712//catechol-containing compound metabolic process;GO:0055114//oxidation-reduction process
PDE_05240	109.806	246.387	86.9545	47.3645	46.7767	-1.2311	0.913637	0.125256	0.31505	hypothetical protein	-	-	-	-
PDE_05640	30.2379	115.809	4.63531	43.5358	10.6694	-1.50287	0.857678	0.00565867	0.0319554	hypothetical protein	K17989|1|0.0|617|pcs:Pc13g07300|L-serine/L-threonine ammonia-lyase [EC:4.3.1.17 4.3.1.19] (A)	-	GO:0030170//pyridoxal phosphate binding	GO:0006520//cellular amino acid metabolic process
PDE_05733	141.609	197.686	15.5612	57.4008	29.3937	-2.26834	0.947806	9.08618e-11	3.77977e-09	hypothetical protein	K00074|1|0.0|565|nfi:NFIA_028960|3-hydroxybutyryl-CoA dehydrogenase [EC:1.1.1.157] (A)	-	GO:0003857//3-hydroxyacyl-CoA dehydrogenase activity;GO:0016491//oxidoreductase activity;GO:0003857//3-hydroxyacyl-CoA dehydrogenase activity;GO:0016491//oxidoreductase activity;GO:0003857//3-hydroxyacyl-CoA dehydrogenase activity;GO:0016491//oxidoreductase activity	GO:0006631//fatty acid metabolic process;GO:0055114//oxidation-reduction process;GO:0006631//fatty acid metabolic process;GO:0055114//oxidation-reduction process;GO:0006631//fatty acid metabolic process;GO:0055114//oxidation-reduction process
PDE_06017	27.19	28.2585	13.2042	18.997	11.6397	-1.22403	0.825391	0.00107858	0.00822228	hypothetical protein	-	-	GO:0016491//oxidoreductase activity	GO:0055114//oxidation-reduction process
PDE_06018	84.4628	112.456	37.1998	96.1934	41.4178	-1.02807	0.887306	0.0154256	0.0700249	hypothetical protein	K16261|1|0.0|945|pcs:Pc21g14020|yeast amino acid transporter (A)	GO:0016020//membrane;GO:0016021//integral component of membrane	-	GO:0006810//transport;GO:0055085//transmembrane transport;GO:0006865//amino acid transport;GO:0055085//transmembrane transport
PDE_06289	25.5664	27.2153	10.7651	16.7906	9.93316	-1.36393	0.831503	0.0161514	0.0725011	hypothetical protein	K04082|1|4e-120|348|pcs:Pc20g09290|molecular chaperone HscB (A)	-	-	-
PDE_07217	76.1135	75.5903	21.1298	157.566	32.4421	-1.23028	0.901067	4.51779e-06	7.21874e-05	hypothetical protein	K00605|1|0.0|743|pcs:Pc16g07470|aminomethyltransferase [EC:2.1.2.10] (A)	-	-	-
PDE_07723	158.136	145.579	99.4854	59.7462	51.7774	-1.61077	0.937619	0.0708974	0.21223	hypothetical protein	K15437|1|0.0|641|pcs:Pc21g02360|aminoacyl tRNA synthase complex-interacting multifunctional protein 1 (A)	-	GO:0000049//tRNA binding;GO:0000049//tRNA binding	-
PDE_07808	54.1636	70.5537	18.0682	28.4801	25.1508	-1.10672	0.872596	0.000215602	0.00212108	hypothetical protein	K15084|1|0.0|546|ang:ANI_1_1306184|solute carrier family 25 (mitochondrial carrier protein), member 16 (A)	GO:0005743//mitochondrial inner membrane;GO:0005743//mitochondrial inner membrane	-	GO:0055085//transmembrane transport;GO:0055085//transmembrane transport;GO:0055085//transmembrane transport;GO:0055085//transmembrane transport
PDE_07956	56.2685	232.517	16.79	3.04786	11.1266	-2.33831	0.924462	0.240216	0.479687	hypothetical protein	K00480|1|0.0|752|pcs:Pc06g00170|salicylate hydroxylase [EC:1.14.13.1] (A)	-	GO:0016491//oxidoreductase activity;GO:0016491//oxidoreductase activity;GO:0016491//oxidoreductase activity;GO:0016491//oxidoreductase activity;GO:0016491//oxidoreductase activity	GO:0008152//metabolic process;GO:0008152//metabolic process;GO:0008152//metabolic process;GO:0008152//metabolic process;GO:0008152//metabolic process
PDE_07996	113.739	167.9	21.7064	26.1167	35.0876	-1.6967	0.933889	2.70018e-13	1.68125e-11	hypothetical protein	K00020|1|0.0|554|pcs:Pc21g20910|3-hydroxyisobutyrate dehydrogenase [EC:1.1.1.31] (A)	-	GO:0008442//3-hydroxyisobutyrate dehydrogenase activity;GO:0004616//phosphogluconate dehydrogenase (decarboxylating) activity	GO:0006573//valine metabolic process;GO:0055114//oxidation-reduction process;GO:0006098//pentose-phosphate shunt;GO:0055114//oxidation-reduction process
PDE_08539	59.8453	96.736	4.58751	4.56883	9.06685	-2.72256	0.930816	4.08214e-11	1.79894e-09	hypothetical protein	K09699|1|0.0|701|pcs:Pc22g05180|2-oxoisovalerate dehydrogenase E2 component (dihydrolipoyl transacylase) [EC:2.3.1.168] (A)	-	GO:0016746//transferase activity, transferring acyl groups;GO:0016746//transferase activity, transferring acyl groups	GO:0008152//metabolic process;GO:0008152//metabolic process
PDE_08640	31.6114	38.6116	13.5645	10.3091	11.6139	-1.44459	0.858196	1.34998e-07	2.95435e-06	hypothetical protein	-	-	GO:0005524//ATP binding;GO:0016772//transferase activity, transferring phosphorus-containing groups;GO:0016772//transferase activity, transferring phosphorus-containing groups;GO:0005524//ATP binding	GO:0016310//phosphorylation;GO:0016310//phosphorylation
PDE_08733	18.0409	41.2014	2.18108	1.78026	2.77043	-2.70309	0.846783	0.243158	0.483361	putative chitosanase	K01233|1|2e-153|435|pcs:Pc12g07820|chitosanase [EC:3.2.1.132] (A)	-	-	-
PDE_08806	102.985	176.858	5.60612	9.42738	12.1465	-3.08383	0.948548	1.88588e-23	3.03344e-21	hypothetical protein	K00166|1|0.0|803|pcs:Pc12g08790|2-oxoisovalerate dehydrogenase E1 component alpha subunit [EC:1.2.4.4] (A)	-	GO:0016624//oxidoreductase activity, acting on the aldehyde or oxo group of donors, disulfide as acceptor	GO:0008152//metabolic process
PDE_08813	26.0525	33.616	2.58002	8.91552	11.3641	-1.19693	0.818433	0.000834382	0.0065951	hypothetical protein	K00309|2|0.0|674|afm:AFUA_6G08760|[EC:1.5.3.-] (A)	-	GO:0004657//proline dehydrogenase activity	GO:0006537//glutamate biosynthetic process;GO:0006562//proline catabolic process;GO:0055114//oxidation-reduction process
PDE_08878	1621.48	3012.52	1347.74	8331.2	598.358	-1.43823	0.9486	2.01386e-10	7.68214e-09	hypothetical protein	K01610|1|0.0|1140|pcs:Pc12g09360|phosphoenolpyruvate carboxykinase (ATP) [EC:4.1.1.49] (A)	-	GO:0004612//phosphoenolpyruvate carboxykinase (ATP) activity;GO:0005524//ATP binding;GO:0004612//phosphoenolpyruvate carboxykinase (ATP) activity;GO:0005524//ATP binding;GO:0004612//phosphoenolpyruvate carboxykinase (ATP) activity;GO:0005524//ATP binding;GO:0004612//phosphoenolpyruvate carboxykinase (ATP) activity;GO:0005524//ATP binding	GO:0006094//gluconeogenesis;GO:0006094//gluconeogenesis;GO:0006094//gluconeogenesis;GO:0006094//gluconeogenesis
PDE_08917	233.184	393.749	64.4428	58.0527	90.2445	-1.36955	0.934701	0.144229	0.345218	hypothetical protein	K01426|1|0.0|837|pcs:Pc12g09880|amidase [EC:3.5.1.4] (A)	-	GO:0016884//carbon-nitrogen ligase activity, with glutamine as amido-N-donor	-
PDE_08947	173.294	257.863	61.2244	79.7364	44.937	-1.94724	0.946614	0.0927311	0.257095	hypothetical protein	K00391|4|2e-98|288|afm:AFUA_6G07840|[EC:1.8.4.-] (A)	-	GO:0033743//peptide-methionine (R)-S-oxide reductase activity;GO:0033743//peptide-methionine (R)-S-oxide reductase activity	GO:0055114//oxidation-reduction process;GO:0055114//oxidation-reduction process
PDE_08962	432.981	429.132	331.895	277.315	150.266	-1.52678	0.945578	0.00031918	0.00295909	hypothetical protein	-	-	GO:0020037//heme binding;GO:0020037//heme binding;GO:0020037//heme binding;GO:0020037//heme binding;GO:0020037//heme binding;GO:0020037//heme binding;GO:0020037//heme binding	-
PDE_09038	398.439	592.417	118.44	106.785	51.7107	-2.94582	0.963431	0.0529289	0.172982	hypothetical protein	K11173|1|0.0|912|afv:AFLA_035760|hydroxyacid-oxoacid transhydrogenase [EC:1.1.99.24] (A)	-	GO:0016491//oxidoreductase activity;GO:0046872//metal ion binding	GO:0055114//oxidation-reduction process
PDE_09047	158.037	210.17	15.4234	16.3601	34.0268	-2.21552	0.948928	8.36116e-08	1.89867e-06	hypothetical protein	K00167|1|0.0|694|pcs:Pc12g11200|2-oxoisovalerate dehydrogenase E1 component beta subunit [EC:1.2.4.4] (A)	-	GO:0003824//catalytic activity	GO:0008152//metabolic process
PDE_09589	36.5411	35.6554	22.2609	20.0692	16.7515	-1.12523	0.845437	0.000134506	0.00143414	hypothetical protein	-	-	-	-
PDE_09735	149.478	161.258	73.8129	115.857	57.6115	-1.3755	0.928261	3.65564e-08	9.00014e-07	hypothetical protein	K03521|1|8e-164|457|pcs:Pc21g18110|electron transfer flavoprotein beta subunit (A)	-	-	-
PDE_09756	219.718	303.059	25.3777	38.8834	39.9892	-2.45797	0.95504	1.87163e-10	7.25424e-09	hypothetical protein	K01969|1|0.0|1049|pcs:Pc21g01110|3-methylcrotonyl-CoA carboxylase beta subunit [EC:6.4.1.4] (A)	-	-	-
PDE_09757	217.832	336.39	20.3554	28.5112	37.2074	-2.54956	0.95561	6.50434e-16	5.45855e-14	hypothetical protein	K00253|1|0.0|784|pcs:Pc21g01100|isovaleryl-CoA dehydrogenase [EC:1.3.8.4] (A)	-	-	-
PDE_09769	175.017	238.391	24.6722	44.8029	43.372	-2.01266	0.947788	3.32963e-08	8.34655e-07	hypothetical protein	K01968|1|0.0|1219|pcs:Pc21g01060|3-methylcrotonyl-CoA carboxylase alpha subunit [EC:6.4.1.4] (A)	-	-	-

## Sheet: Group_8 2 genes
GeneID	Means (Wild-type on Cellulose)	Means (ΔclrB on Cellulose)	Means (ΔcreA on Cellulose)	Means (ΔcreA-ΔclrB on Cellulose)	Means (ΔamyR on Cellulose)	log2Ratio(ΔamyR/Wild-type)	Probability (ΔamyR/Wild-type)	P-value (ΔamyR/Wild-type)	FDR (ΔamyR/Wild-type)	Description	KEGG Orthology	GO Component	GO Function	GO Process
PDE_00082	104.892	135.934	175.289	61.8756	48.7383	-1.10577	0.902638	5.24258e-05	0.000629936	hypothetical protein	-	-	GO:0008146//sulfotransferase activity	-
PDE_02512	32.2556	29.7966	32.9517	91.252	12.2076	-1.40177	0.858075	0.0959866	0.262956	hypothetical protein	-	-	-	-

## Sheet: Group_9 2 genes
GeneID	Means (Wild-type on Cellulose)	Means (ΔclrB on Cellulose)	Means (ΔcreA on Cellulose)	Means (ΔcreA-ΔclrB on Cellulose)	Means (ΔamyR on Cellulose)	log2Ratio(ΔamyR/Wild-type)	Probability (ΔamyR/Wild-type)	P-value (ΔamyR/Wild-type)	FDR (ΔamyR/Wild-type)	Description	KEGG Orthology	GO Component	GO Function	GO Process
PDE_06605	4143.42	3107.85	3325.66	1407.06	2029.86	-1.02945	0.927207	0.540792	0.768997	hypothetical protein	-	-	-	-
PDE_06607	2734.36	1421.86	1615.03	739.323	1041.97	-1.39189	0.948738	0.37451	0.627391	hypothetical protein	-	-	-	-
